# Supplementary material for: Senescence-associated lineage-aberrant plasticity evokes T-cell-mediated tumor control
Source: Springer Nature journal article supplement (doi:10.1038/s41467-025-57429-x), 2025-03-31
Supplement: MOESM2 [file 41467_2025_57429_MOESM2_ESM.pdf › 41467_2025_57429_MOESM2_ESM.pdf]

## **Description of Additional Supplementary Files**

|                       |                                                                                                          |
|-----------------------|----------------------------------------------------------------------------------------------------------|
| Supplementary Data 1: | Induced network modules analysis                                                                         |
| Supplementary Data 2: | Immune deconvolution analyses                                                                            |
| Supplementary Data 3: | sh_TF differential expression analyses                                                                   |
| Supplementary Data 4: | DLBCL cell line ADR treatment and FACS data                                                              |
| Supplementary Data 5: | PU.1 targets in lymphoma TIS                                                                             |
| Supplementary Data 6: | Antibodies and Taqman assays                                                                             |
| Supplementary Data 7: | Central gene sets for gene set enrichment analyses                                                       |
| Source Data:          | Statistical source data for all appropriate figures and uncropped Western and Simple Western blot images |
