# Supplementary material for: Senescence-associated lineage-aberrant plasticity evokes T-cell-mediated tumor control
Source: Springer Nature journal article supplement (doi:10.1038/s41467-025-57429-x), 2025-03-31
Supplement: MOESM11 [file 41467_2025_57429_MOESM11_ESM.pdf › 41467_2025_57429_MOESM11_ESM.pdf]

# **Senescence-associated lineage-aberrant plasticity evokes T-cell-mediated tumor control**

Corresponding Author: Professor Clemens Schmitt

This manuscript has been previously reviewed at another journal. This document only contains information relating to versions considered at Nature Communications.

**This file contains all reviewer reports in order by version, followed by all author rebuttals in order by version.**

Version 0:

Reviewer comments:

Reviewer #1

(Remarks to the Author)

The revised version of the manuscript addresses most reviewers' comments and is now much improved. A change in terminology addressed the main concern regarding the lack of evidence of transdifferentiation of senescent B cells into myeloid-like cells—the new term “cross-differentiation” better reflects the findings. The manuscript was also strengthened by additional data showing a similar pattern lineage lineage-induced plasticity occurring beyond B cell lymphomas.

Reviewer #2

(Remarks to the Author)

Although the authors did not provide experimental data or additional analysis for every point raised, they made a thorough effort to address all the concerns. Their responses were thoughtful and comprehensive, demonstrating a commitment to improving the manuscript based on the feedback. The revisions have significantly strengthened the paper, and it is now suitable for publication in its current form.

Reviewer #3

(Remarks to the Author)

The authors have addressed my questions adequately. I have no further comments.

**Open Access** This Peer Review File is licensed under a Creative Commons Attribution 4.0 International License, which permits use, sharing, adaptation, distribution and reproduction in any medium or format, as long as you give appropriate credit to the original author(s) and the source, provide a link to the Creative Commons license, and indicate if changes were made.

In cases where reviewers are anonymous, credit should be given to 'Anonymous Referee' and the source.

The images or other third party material in this Peer Review File are included in the article's Creative Commons license, unless indicated otherwise in a credit line to the material. If material is not included in the article's Creative Commons license and your intended use is not permitted by statutory regulation or exceeds the permitted use, you will need to obtain permission directly from the copyright holder.

To view a copy of this license, visit <https://creativecommons.org/licenses/by/4.0/>
