# Supplementary material for: Senescence-associated lineage-aberrant plasticity evokes T-cell-mediated tumor control
Source: Nat Commun. 2025 Mar 31;16:3079. doi: 10.1038/s41467-025-57429-x (PMC11955568; doi:10.1038/s41467-025-57429-x)
Supplement: Supplementary file 3 — Supplementary Data 1 [file 41467_2025_57429_MOESM3_ESM.xlsx]

## Sheet: Data S1
Supplementary Data 1 lists the input and output used to generate the gene regulatory interaction map shown in Fig. 1a.
Note that this file contains the following worksheets:
Worksheet	Description
A	TIS-upregulated genes from TIS model GEPs (GSE134753)
B	Readable network results of induced network module analysis using input from A

## Sheet: S1A - Input
Supplementary Data 1A lists differentially upregulated genes between TIS and non-TIS conditions from TIS model GEPs (GSE134753) as published in Schleich et al., Nat Commun, 2020 and relates to Fig. 1 a.
This gene list was fed into the ConsensusPathDB - induced network modules tool (at http://cpdb.molgen.mpg.de/) using gene regulatory interactions and allowing for intermediate nodes. Described in Berger, S.I., Posner, J.M. & Ma'ayan, A. Genes2Networks: connecting lists of gene symbols using mammalian protein interactions databases. BMC Bioinformatics 8, 372 (2007)
Symbol	Signature	logFC	adj.P.Val	Entrez	Name	Organism	HugoSymbol
CXCL6	TIS up	2.89863	1.11774e-05	6372	C-X-C motif chemokine ligand 6	human	CXCL6
LCN2	TIS up	2.85964	9.54304e-05	3934	lipocalin 2	human	LCN2
MS4A6A	TIS up	2.81499	3.47033e-05	64231	membrane spanning 4-domains A6A	human	MS4A6A
CALD1	TIS up	2.77801	3.71842e-05	800	caldesmon 1	human	CALD1
MMP13	TIS up	2.74699	0.00049013	4322	matrix metallopeptidase 13	human	MMP13
FKBP9	TIS up	2.58491	0.00012272	11328	FK506 binding protein 9	human	FKBP9
FN1	TIS up	2.55561	2.24778e-05	2335	fibronectin 1	human	FN1
TM4SF1	TIS up	2.52057	5.28966e-05	4071	transmembrane 4 L six family member 1	human	TM4SF1
AHNAK2	TIS up	2.50079	8.096e-10	113146	AHNAK nucleoprotein 2	human	AHNAK2
LOX	TIS up	2.46302	5.3082e-05	4015	lysyl oxidase	human	LOX
CTGF	TIS up	2.45391	4.45689e-05	1490	connective tissue growth factor	human	CTGF
EFEMP1	TIS up	2.43393	0.000673047	2202	EGF containing fibulin extracellular matrix protein 1	human	EFEMP1
GRB10	TIS up	2.41115	2.65674e-07	2887	growth factor receptor bound protein 10	human	GRB10
ACOD1	TIS up	2.3942	0.00113035	730249	aconitate decarboxylase 1	human	ACOD1
CPE	TIS up	2.39363	0.000251804	1363	carboxypeptidase E	human	CPE
MMP12	TIS up	2.3715	0.00168836	4321	matrix metallopeptidase 12	human	MMP12
PTGS2	TIS up	2.36115	0.000498434	5743	prostaglandin-endoperoxide synthase 2	human	PTGS2
CXCL2	TIS up	2.36103	4.51519e-05	2920	C-X-C motif chemokine ligand 2	human	CXCL2
BGN	TIS up	2.34831	0.000112456	633	biglycan	human	BGN
IL6	TIS up	2.33882	0.000320882	3569	interleukin 6	human	IL6
CTTN	TIS up	2.32615	7.0778e-05	2017	cortactin	human	CTTN
CXCL3	TIS up	2.29817	0.000236658	2921	C-X-C motif chemokine ligand 3	human	CXCL3
F2R	TIS up	2.2659	7.68647e-05	2149	coagulation factor II thrombin receptor	human	F2R
PRSS23	TIS up	2.25889	9.20758e-05	11098	serine protease 23	human	PRSS23
KITLG	TIS up	2.24634	0.000104178	4254	KIT ligand	human	KITLG
NID1	TIS up	2.2373	4.5653e-05	4811	nidogen 1	human	NID1
HMGA2	TIS up	2.22889	4.19758e-06	8091	high mobility group AT-hook 2	human	HMGA2
MS4A7	TIS up	2.21944	5.3676e-05	58475	membrane spanning 4-domains A7	human	MS4A7
CLEC4D	TIS up	2.18145	0.00743796	338339	C-type lectin domain family 4 member D	human	CLEC4D
SPP1	TIS up	2.17914	0.000221765	6696	secreted phosphoprotein 1	human	SPP1
MMP8	TIS up	2.1704	0.000863732	4317	matrix metallopeptidase 8	human	MMP8
EREG	TIS up	2.1652	0.000112854	2069	epiregulin	human	EREG
FAM198B	TIS up	2.13181	8.08186e-06	51313	family with sequence similarity 198 member B	human	FAM198B
LYZ	TIS up	2.12047	0.00460487	4069	lysozyme	human	LYZ
PRNP	TIS up	2.08446	0.000400491	5621	prion protein	human	PRNP
CCL13	TIS up	2.08227	0.000352705	6357	C-C motif chemokine ligand 13	human	CCL13
FPR1	TIS up	2.07683	0.000648604	2357	formyl peptide receptor 1	human	FPR1
SERPINH1	TIS up	2.06354	1.80349e-05	871	serpin family H member 1	human	SERPINH1
EMP1	TIS up	2.06095	0.00199599	2012	epithelial membrane protein 1	human	EMP1
CFP	TIS up	2.05968	2.79356e-05	5199	complement factor properdin	human	CFP
PLIN2	TIS up	2.0438	1.57046e-05	123	perilipin 2	human	PLIN2
FGF7	TIS up	2.03133	7.68927e-05	2252	fibroblast growth factor 7	human	FGF7
COL1A2	TIS up	2.02836	0.00120379	1278	collagen type I alpha 2 chain	human	COL1A2
AXL	TIS up	2.02805	9.87458e-06	558	AXL receptor tyrosine kinase	human	AXL
VASN	TIS up	2.02316	9.64738e-05	114990	vasorin	human	VASN
LPL	TIS up	2.00903	0.00740505	4023	lipoprotein lipase	human	LPL
TIMP2	TIS up	2.0005	0.000107595	7077	TIMP metallopeptidase inhibitor 2	human	TIMP2
FBLN2	TIS up	1.9978	8.36985e-05	2199	fibulin 2	human	FBLN2
AK1	TIS up	1.99673	1.1357e-07	203	adenylate kinase 1	human	AK1
RPL39L	TIS up	1.98727	0.000198242	116832	ribosomal protein L39 like	human	RPL39L
IL1RN	TIS up	1.98703	0.00385955	3557	interleukin 1 receptor antagonist	human	IL1RN
PCOLCE	TIS up	1.98632	0.000190741	5118	procollagen C-endopeptidase enhancer	human	PCOLCE
CCL7	TIS up	1.93655	0.000381369	6354	C-C motif chemokine ligand 7	human	CCL7
TNFAIP2	TIS up	1.93649	0.00201124	7127	TNF alpha induced protein 2	human	TNFAIP2
SPARC	TIS up	1.935	0.000117091	6678	secreted protein acidic and cysteine rich	human	SPARC
IL1B	TIS up	1.92475	0.000308944	3553	interleukin 1 beta	human	IL1B
CRYAB	TIS up	1.90073	0.000471358	1410	crystallin alpha B	human	CRYAB
CAV1	TIS up	1.89784	0.000577854	857	caveolin 1	human	CAV1
PRKG2	TIS up	1.89775	0.000197452	5593	protein kinase, cGMP-dependent, type II	human	PRKG2
OSMR	TIS up	1.89387	5.51561e-05	9180	oncostatin M receptor	human	OSMR
CD36	TIS up	1.8557	1.2774e-05	948	CD36 molecule	human	CD36
TIMP1	TIS up	1.85173	0.000285352	7076	TIMP metallopeptidase inhibitor 1	human	TIMP1
IFITM3	TIS up	1.8481	0.00107078	10410	interferon induced transmembrane protein 3	human	IFITM3
RTP4	TIS up	1.84761	0.00264497	64108	receptor transporter protein 4	human	RTP4
ANXA8L1	TIS up	1.8383	1.53337e-05	728113	annexin A8 like 1	human	ANXA8L1
ANXA8	TIS up	1.8383	1.53337e-05	653145	annexin A8	human	ANXA8
ADGRE1	TIS up	1.82851	0.00533431	2015	adhesion G protein-coupled receptor E1	human	ADGRE1
PLA2G7	TIS up	1.82777	0.00213016	7941	phospholipase A2 group VII	human	PLA2G7
PLS3	TIS up	1.82762	0.000184977	5358	plastin 3	human	PLS3
EPHX1	TIS up	1.82334	6.75514e-06	2052	epoxide hydrolase 1	human	EPHX1
FSCN1	TIS up	1.8112	0.00304036	6624	fascin actin-bundling protein 1	human	FSCN1
CAVIN2	TIS up	1.8056	0.000483639	8436	caveolae associated protein 2	human	CAVIN2
MPEG1	TIS up	1.80433	8.03937e-05	219972	macrophage expressed 1	human	MPEG1
ARMCX2	TIS up	1.79998	0.00109929	9823	armadillo repeat containing, X-linked 2	human	ARMCX2
DCN	TIS up	1.79771	0.00284742	1634	decorin	human	DCN
SLC25A24	TIS up	1.79744	0.000657826	29957	solute carrier family 25 member 24	human	SLC25A24
COL1A1	TIS up	1.79486	3.45134e-05	1277	collagen type I alpha 1 chain	human	COL1A1
RAI14	TIS up	1.7918	0.000924032	26064	retinoic acid induced 14	human	RAI14
FYB1	TIS up	1.79033	0.0050922	2533	FYN binding protein 1	human	FYB1
NRN1	TIS up	1.78589	2.42789e-05	51299	neuritin 1	human	NRN1
CCR1	TIS up	1.77974	0.000863018	1230	C-C motif chemokine receptor 1	human	CCR1
USP18	TIS up	1.77675	0.00266274	11274	ubiquitin specific peptidase 18	human	USP18
CD34	TIS up	1.77566	0.000190833	947	CD34 molecule	human	CD34
ECM1	TIS up	1.75702	2.80625e-06	1893	extracellular matrix protein 1	human	ECM1
DLK1	TIS up	1.75473	3.61151e-05	8788	delta like non-canonical Notch ligand 1	human	DLK1
THBS2	TIS up	1.75204	0.000606614	7058	thrombospondin 2	human	THBS2
CEBPD	TIS up	1.74277	0.0002424	1052	CCAAT enhancer binding protein delta	human	CEBPD
CLEC4E	TIS up	1.74268	0.00827547	26253	C-type lectin domain family 4 member E	human	CLEC4E
THBS1	TIS up	1.7416	0.00119923	7057	thrombospondin 1	human	THBS1
IFIT1B	TIS up	1.73597	0.000118702	439996	interferon induced protein with tetratricopeptide repeats 1B	human	IFIT1B
FSTL1	TIS up	1.73302	0.00115713	11167	follistatin like 1	human	FSTL1
MIR22HG	TIS up	1.7327	4.30282e-07	84981	MIR22 host gene	human	MIR22HG
UGT1A6	TIS up	1.73054	0.00607768	54578	UDP glucuronosyltransferase family 1 member A6	human	UGT1A6
C3	TIS up	1.7225	0.000970348	718	complement C3	human	C3
PLPP3	TIS up	1.72177	0.000106281	8613	phospholipid phosphatase 3	human	PLPP3
RSAD2	TIS up	1.70055	0.000158406	91543	radical S-adenosyl methionine domain containing 2	human	RSAD2
WWTR1	TIS up	1.69773	9.99383e-05	25937	WW domain containing transcription regulator 1	human	WWTR1
LILRB3	TIS up	1.69167	0.000749986	11025	leukocyte immunoglobulin like receptor B3	human	LILRB3
CTSD	TIS up	1.69046	5.87884e-07	1509	cathepsin D	human	CTSD
MARCKS	TIS up	1.68728	0.000260247	4082	myristoylated alanine rich protein kinase C substrate	human	MARCKS
ADAM8	TIS up	1.67819	0.00167047	101	ADAM metallopeptidase domain 8	human	ADAM8
IL1RL1	TIS up	1.67733	0.000373068	9173	interleukin 1 receptor like 1	human	IL1RL1
MDFIC	TIS up	1.67412	0.00458837	29969	MyoD family inhibitor domain containing	human	MDFIC
CLEC6A	TIS up	1.67222	0.00503116	93978	C-type lectin domain containing 6A	human	CLEC6A
CAVIN1	TIS up	1.67196	0.000122172	284119	caveolae associated protein 1	human	CAVIN1
NCKAP1	TIS up	1.66385	0.000145781	10787	NCK associated protein 1	human	NCKAP1
PLOD2	TIS up	1.65792	0.00552861	5352	procollagen-lysine,2-oxoglutarate 5-dioxygenase 2	human	PLOD2
CD300A	TIS up	1.6544	0.000345198	11314	CD300a molecule	human	CD300A
CCL3L3	TIS up	1.64115	0.00495165	414062	C-C motif chemokine ligand 3 like 3	human	CCL3L3
PTX3	TIS up	1.63773	0.00091018	5806	pentraxin 3	human	PTX3
COL5A2	TIS up	1.61823	0.000688567	1290	collagen type V alpha 2 chain	human	COL5A2
SERPINF1	TIS up	1.61296	0.00489511	5176	serpin family F member 1	human	SERPINF1
PFN2	TIS up	1.61053	0.00431465	5217	profilin 2	human	PFN2
LOXL1	TIS up	1.60995	9.644e-05	4016	lysyl oxidase like 1	human	LOXL1
CD109	TIS up	1.60611	0.000111167	135228	CD109 molecule	human	CD109
FCGR3A	TIS up	1.60457	0.00256073	2214	Fc fragment of IgG receptor IIIa	human	FCGR3A
FCGR3B	TIS up	1.60457	0.00256073	2215	Fc fragment of IgG receptor IIIb	human	FCGR3B
SERPINE1	TIS up	1.60365	0.00143937	5054	serpin family E member 1	human	SERPINE1
IFI16	TIS up	1.60097	0.00243766	3428	interferon gamma inducible protein 16	human	IFI16
GBP2	TIS up	1.59729	0.000551714	2634	guanylate binding protein 2	human	GBP2
CTSC	TIS up	1.59498	0.000254062	1075	cathepsin C	human	CTSC
ANGPTL2	TIS up	1.59282	4.51519e-05	23452	angiopoietin like 2	human	ANGPTL2
COL6A1	TIS up	1.58322	1.40107e-05	1291	collagen type VI alpha 1 chain	human	COL6A1
VCAN	TIS up	1.57827	0.000303748	1462	versican	human	VCAN
IGFBP6	TIS up	1.57571	0.000455188	3489	insulin like growth factor binding protein 6	human	IGFBP6
IL10	TIS up	1.57419	0.00049013	3586	interleukin 10	human	IL10
FOSL2	TIS up	1.57243	4.40151e-05	2355	FOS like 2, AP-1 transcription factor subunit	human	FOSL2
WLS	TIS up	1.56091	0.000474914	79971	wntless Wnt ligand secretion mediator	human	WLS
XDH	TIS up	1.55872	0.00126849	7498	xanthine dehydrogenase	human	XDH
PRRX1	TIS up	1.5566	6.33155e-05	5396	paired related homeobox 1	human	PRRX1
SPEG	TIS up	1.53671	0.00191994	10290	SPEG complex locus	human	SPEG
EPB41L3	TIS up	1.53375	9.78412e-05	23136	erythrocyte membrane protein band 4.1 like 3	human	EPB41L3
PROCR	TIS up	1.53104	0.00088082	10544	protein C receptor	human	PROCR
MARCH1	TIS up	1.53095	0.000352705	55016	membrane associated ring-CH-type finger 1	human	MARCH1
KLF6	TIS up	1.52717	3.33697e-08	1316	Kruppel like factor 6	human	KLF6
ZNF365	TIS up	1.52672	0.000802794	22891	zinc finger protein 365	human	ZNF365
CD300LF	TIS up	1.52634	2.1882e-05	146722	CD300 molecule like family member f	human	CD300LF
EFEMP2	TIS up	1.52387	0.000535931	30008	EGF containing fibulin extracellular matrix protein 2	human	EFEMP2
S100A6	TIS up	1.51417	0.00114627	6277	S100 calcium binding protein A6	human	S100A6
AIF1	TIS up	1.50825	0.00352598	199	allograft inflammatory factor 1	human	AIF1
SEMA3C	TIS up	1.50768	0.00118623	10512	semaphorin 3C	human	SEMA3C
TCEAL8	TIS up	1.50397	0.000229505	90843	transcription elongation factor A like 8	human	TCEAL8
FAT1	TIS up	1.50255	0.000324611	2195	FAT atypical cadherin 1	human	FAT1
CD300LD	TIS up	1.50216	0.000694773	100131439	CD300 molecule like family member d	human	CD300LD
COL5A1	TIS up	1.49893	0.000500281	1289	collagen type V alpha 1 chain	human	COL5A1
CSF2RB	TIS up	1.49776	0.000296519	1439	colony stimulating factor 2 receptor beta common subunit	human	CSF2RB
CD68	TIS up	1.4948	0.000938308	968	CD68 molecule	human	CD68
PDGFRA	TIS up	1.49194	0.000104131	5156	platelet derived growth factor receptor alpha	human	PDGFRA
SIRPA	TIS up	1.4895	0.00036926	140885	signal regulatory protein alpha	human	SIRPA
NEAT1	TIS up	1.48191	4.04633e-07	283131	nuclear paraspeckle assembly transcript 1 (non-protein coding)	human	NEAT1
DUSP4	TIS up	1.48023	0.000634657	1846	dual specificity phosphatase 4	human	DUSP4
PHLDA3	TIS up	1.47913	9.23572e-07	23612	pleckstrin homology like domain family A member 3	human	PHLDA3
ACKR3	TIS up	1.46573	0.00107486	57007	atypical chemokine receptor 3	human	ACKR3
PEA15	TIS up	1.46185	0.000812497	8682	proliferation and apoptosis adaptor protein 15	human	PEA15
SQSTM1	TIS up	1.4617	8.96753e-10	8878	sequestosome 1	human	SQSTM1
MMP9	TIS up	1.46068	0.00141994	4318	matrix metallopeptidase 9	human	MMP9
TNFRSF1B	TIS up	1.4598	2.26147e-05	7133	TNF receptor superfamily member 1B	human	TNFRSF1B
DNASE1L1	TIS up	1.45867	1.79541e-06	1774	deoxyribonuclease 1 like 1	human	DNASE1L1
ITGAM	TIS up	1.45692	0.00375835	3684	integrin subunit alpha M	human	ITGAM
EXT1	TIS up	1.45249	6.56454e-05	2131	exostosin glycosyltransferase 1	human	EXT1
CYR61	TIS up	1.45011	4.91095e-05	3491	cysteine rich angiogenic inducer 61	human	CYR61
ACTN1	TIS up	1.44834	0.00016639	87	actinin alpha 1	human	ACTN1
MALAT1	TIS up	1.44442	4.91017e-06	378938	metastasis associated lung adenocarcinoma transcript 1 (non-protein coding)	human	MALAT1
PILRA	TIS up	1.44005	0.00505917	29992	paired immunoglobin like type 2 receptor alpha	human	PILRA
MMP2	TIS up	1.43872	0.000470985	4313	matrix metallopeptidase 2	human	MMP2
TMEM140	TIS up	1.43706	2.98727e-09	55281	transmembrane protein 140	human	TMEM140
FNDC3B	TIS up	1.43286	0.0051143	64778	fibronectin type III domain containing 3B	human	FNDC3B
HCK	TIS up	1.42981	0.00892775	3055	HCK proto-oncogene, Src family tyrosine kinase	human	HCK
SLAMF9	TIS up	1.42387	7.16809e-06	89886	SLAM family member 9	human	SLAMF9
IFIT3	TIS up	1.42281	7.67281e-05	3437	interferon induced protein with tetratricopeptide repeats 3	human	IFIT3
FABP7	TIS up	1.41645	7.90178e-05	2173	fatty acid binding protein 7	human	FABP7
TSPAN17	TIS up	1.41532	1.68389e-06	26262	tetraspanin 17	human	TSPAN17
CSF1	TIS up	1.41361	3.84381e-05	1435	colony stimulating factor 1	human	CSF1
GREM2	TIS up	1.41033	8.72874e-05	64388	gremlin 2, DAN family BMP antagonist	human	GREM2
TLR2	TIS up	1.40762	0.000460106	7097	toll like receptor 2	human	TLR2
LHFPL6	TIS up	1.40294	0.00375632	10186	LHFPL tetraspan subfamily member 6	human	LHFPL6
VOPP1	TIS up	1.4025	1.45181e-05	81552	VOPP1, WBP1/VOPP1 family member	human	VOPP1
ARHGAP24	TIS up	1.40019	0.000330193	83478	Rho GTPase activating protein 24	human	ARHGAP24
S100A4	TIS up	1.39998	0.00645583	6275	S100 calcium binding protein A4	human	S100A4
VSIR	TIS up	1.39515	5.91586e-06	64115	V-set immunoregulatory receptor	human	VSIR
LRP11	TIS up	1.3938	3.11275e-05	84918	LDL receptor related protein 11	human	LRP11
PLD4	TIS up	1.3933	1.87093e-06	122618	phospholipase D family member 4	human	PLD4
MCUB	TIS up	1.39189	0.00709369	55013	mitochondrial calcium uniporter dominant negative beta subunit	human	MCUB
RGS1	TIS up	1.38952	0.00409434	5996	regulator of G protein signaling 1	human	RGS1
CTSB	TIS up	1.38547	6.48115e-05	1508	cathepsin B	human	CTSB
ACVR1	TIS up	1.38192	0.000749986	90	activin A receptor type 1	human	ACVR1
CAV2	TIS up	1.38164	0.00536121	858	caveolin 2	human	CAV2
FOXG1	TIS up	1.38142	0.00307374	2290	forkhead box G1	human	FOXG1
EGR3	TIS up	1.38012	0.00816608	1960	early growth response 3	human	EGR3
SERPINB6	TIS up	1.37997	0.00331145	5269	serpin family B member 6	human	SERPINB6
APP	TIS up	1.37976	0.00138116	351	amyloid beta precursor protein	human	APP
RHOB	TIS up	1.37889	4.02388e-09	388	ras homolog family member B	human	RHOB
AQP1	TIS up	1.37752	0.000886633	358	aquaporin 1 (Colton blood group)	human	AQP1
RBP1	TIS up	1.37579	0.00126673	5947	retinol binding protein 1	human	RBP1
P2RX4	TIS up	1.37564	6.65687e-08	5025	purinergic receptor P2X 4	human	P2RX4
OAF	TIS up	1.37462	0.000356368	220323	out at first homolog	human	OAF
ITGAL	TIS up	1.37408	0.00211342	3683	integrin subunit alpha L	human	ITGAL
ACTA2	TIS up	1.36944	2.41265e-05	59	actin, alpha 2, smooth muscle, aorta	human	ACTA2
COL4A5	TIS up	1.368	0.00209934	1287	collagen type IV alpha 5 chain	human	COL4A5
COL6A3	TIS up	1.36036	0.000190142	1293	collagen type VI alpha 3 chain	human	COL6A3
FAM129B	TIS up	1.35762	9.75816e-05	64855	family with sequence similarity 129 member B	human	FAM129B
HSPB8	TIS up	1.35662	0.000148582	26353	heat shock protein family B (small) member 8	human	HSPB8
SLC31A2	TIS up	1.35212	2.16906e-05	1318	solute carrier family 31 member 2	human	SLC31A2
TNC	TIS up	1.35147	0.000487928	3371	tenascin C	human	TNC
TGFBR3	TIS up	1.34659	0.00110546	7049	transforming growth factor beta receptor 3	human	TGFBR3
FBLN5	TIS up	1.346	0.000236432	10516	fibulin 5	human	FBLN5
PTGIR	TIS up	1.34228	0.000429919	5739	prostaglandin I2 receptor	human	PTGIR
SQOR	TIS up	1.34143	0.000971565	58472	sulfide quinone oxidoreductase	human	SQOR
GHR	TIS up	1.3413	0.000330193	2690	growth hormone receptor	human	GHR
SULF2	TIS up	1.33746	3.73335e-06	55959	sulfatase 2	human	SULF2
FERMT2	TIS up	1.33435	0.000794229	10979	fermitin family member 2	human	FERMT2
ATP6V0A1	TIS up	1.33425	1.59983e-10	535	ATPase H+ transporting V0 subunit a1	human	ATP6V0A1
STX3	TIS up	1.33211	5.74321e-05	6809	syntaxin 3	human	STX3
CTSV	TIS up	1.33164	0.00450654	1515	cathepsin V	human	CTSV
P2RY6	TIS up	1.33078	0.00946213	5031	pyrimidinergic receptor P2Y6	human	P2RY6
CCR5	TIS up	1.3268	0.00109725	1234	C-C motif chemokine receptor 5 (gene/pseudogene)	human	CCR5
GPX8	TIS up	1.32469	0.0008672	493869	glutathione peroxidase 8 (putative)	human	GPX8
TPM2	TIS up	1.32427	0.000102757	7169	tropomyosin 2	human	TPM2
AKAP2	TIS up	1.32325	0.000469741	11217	A-kinase anchoring protein 2	human	AKAP2
CA13	TIS up	1.32265	0.00135297	377677	carbonic anhydrase 13	human	CA13
PTPRE	TIS up	1.32215	0.000296856	5791	protein tyrosine phosphatase, receptor type E	human	PTPRE
LAMB1	TIS up	1.32077	0.00101107	3912	laminin subunit beta 1	human	LAMB1
CPNE2	TIS up	1.31924	2.47978e-09	221184	copine 2	human	CPNE2
GNS	TIS up	1.31739	2.60529e-08	2799	glucosamine (N-acetyl)-6-sulfatase	human	GNS
LGALS3BP	TIS up	1.31618	5.50041e-05	3959	galectin 3 binding protein	human	LGALS3BP
ITPRIPL2	TIS up	1.30909	0.00089404	162073	ITPRIP like 2	human	ITPRIPL2
RHOC	TIS up	1.30404	0.00168855	389	ras homolog family member C	human	RHOC
SIRPB1	TIS up	1.2991	0.00401332	10326	signal regulatory protein beta 1	human	SIRPB1
UGT1A10	TIS up	1.29731	0.0054905	54575	UDP glucuronosyltransferase family 1 member A10	human	UGT1A10
UGT1A8	TIS up	1.29731	0.0054905	54576	UDP glucuronosyltransferase family 1 member A8	human	UGT1A8
UGT1A7	TIS up	1.29731	0.0054905	54577	UDP glucuronosyltransferase family 1 member A7	human	UGT1A7
UGT1A9	TIS up	1.29731	0.0054905	54600	UDP glucuronosyltransferase family 1 member A9	human	UGT1A9
SGPL1	TIS up	1.29631	2.25191e-07	8879	sphingosine-1-phosphate lyase 1	human	SGPL1
SLFN13	TIS up	1.2956	8.25166e-06	146857	schlafen family member 13	human	SLFN13
ATP11A	TIS up	1.29429	0.000262907	23250	ATPase phospholipid transporting 11A	human	ATP11A
LRP1	TIS up	1.28916	0.000174651	4035	LDL receptor related protein 1	human	LRP1
NQO1	TIS up	1.28896	3.58605e-05	1728	NAD(P)H quinone dehydrogenase 1	human	NQO1
TCIM	TIS up	1.28556	0.00178393	56892	transcriptional and immune response regulator	human	TCIM
TMEM45A	TIS up	1.28541	8.50306e-05	55076	transmembrane protein 45A	human	TMEM45A
ZYX	TIS up	1.28499	0.000160353	7791	zyxin	human	ZYX
ZFAND2A	TIS up	1.2848	1.32583e-07	90637	zinc finger AN1-type containing 2A	human	ZFAND2A
MMP14	TIS up	1.28407	1.28624e-05	4323	matrix metallopeptidase 14	human	MMP14
LMNA	TIS up	1.27895	0.00184971	4000	lamin A/C	human	LMNA
SOAT1	TIS up	1.27859	0.000285787	6646	sterol O-acyltransferase 1	human	SOAT1
AMPD3	TIS up	1.27715	0.00185118	272	adenosine monophosphate deaminase 3	human	AMPD3
RIN2	TIS up	1.2743	0.00338204	54453	Ras and Rab interactor 2	human	RIN2
MYO1F	TIS up	1.27406	0.0016598	4542	myosin IF	human	MYO1F
MET	TIS up	1.27138	0.0069922	4233	MET proto-oncogene, receptor tyrosine kinase	human	MET
TRAF1	TIS up	1.26889	1.94255e-05	7185	TNF receptor associated factor 1	human	TRAF1
TDRD7	TIS up	1.26831	1.48305e-05	23424	tudor domain containing 7	human	TDRD7
PKD2	TIS up	1.26579	0.000141491	5311	polycystin 2, transient receptor potential cation channel	human	PKD2
PLK2	TIS up	1.26496	0.000215716	10769	polo like kinase 2	human	PLK2
THY1	TIS up	1.26393	0.000341501	7070	Thy-1 cell surface antigen	human	THY1
EGR2	TIS up	1.26151	0.007847	1959	early growth response 2	human	EGR2
CYTH4	TIS up	1.25778	0.000142733	27128	cytohesin 4	human	CYTH4
SGK1	TIS up	1.25476	0.000222594	6446	serum/glucocorticoid regulated kinase 1	human	SGK1
PLXNA1	TIS up	1.25398	8.09624e-08	5361	plexin A1	human	PLXNA1
CYBB	TIS up	1.25056	0.00137873	1536	cytochrome b-245 beta chain	human	CYBB
SLC11A1	TIS up	1.2492	0.00740216	6556	solute carrier family 11 member 1	human	SLC11A1
RAB34	TIS up	1.24654	0.000805882	83871	RAB34, member RAS oncogene family	human	RAB34
PDPN	TIS up	1.2456	0.000387454	10630	podoplanin	human	PDPN
PLTP	TIS up	1.23865	0.00591402	5360	phospholipid transfer protein	human	PLTP
CELF5	TIS up	1.23845	1.05945e-05	60680	CUGBP Elav-like family member 5	human	CELF5
SLC15A3	TIS up	1.23824	0.000131235	51296	solute carrier family 15 member 3	human	SLC15A3
RNF11	TIS up	1.23698	4.38268e-07	26994	ring finger protein 11	human	RNF11
AEBP1	TIS up	1.23665	2.69859e-05	165	AE binding protein 1	human	AEBP1
ZNFX1	TIS up	1.23606	6.76341e-07	57169	zinc finger NFX1-type containing 1	human	ZNFX1
DUSP1	TIS up	1.23295	0.000281869	1843	dual specificity phosphatase 1	human	DUSP1
METRNL	TIS up	1.23215	0.00274126	284207	meteorin like, glial cell differentiation regulator	human	METRNL
PIK3R3	TIS up	1.23022	0.000185171	8503	phosphoinositide-3-kinase regulatory subunit 3	human	PIK3R3
KLF4	TIS up	1.22897	0.000605574	9314	Kruppel like factor 4	human	KLF4
RAB31	TIS up	1.22704	3.66451e-05	11031	RAB31, member RAS oncogene family	human	RAB31
IKBKE	TIS up	1.22392	0.000430963	9641	inhibitor of nuclear factor kappa B kinase subunit epsilon	human	IKBKE
FKBP10	TIS up	1.22325	2.50081e-05	60681	FK506 binding protein 10	human	FKBP10
LURAP1L	TIS up	1.22164	0.000455339	286343	leucine rich adaptor protein 1 like	human	LURAP1L
NRP1	TIS up	1.22081	0.00317364	8829	neuropilin 1	human	NRP1
SEPT8	TIS up	1.2192	0.000365791	23176	septin 8	human	SEPT8
ANTXR2	TIS up	1.21776	0.00840865	118429	anthrax toxin receptor 2	human	ANTXR2
PLEKHO2	TIS up	1.21756	5.98934e-08	80301	pleckstrin homology domain containing O2	human	PLEKHO2
TP53INP2	TIS up	1.21367	7.0815e-06	58476	tumor protein p53 inducible nuclear protein 2	human	TP53INP2
SPECC1	TIS up	1.21147	0.00395874	92521	sperm antigen with calponin homology and coiled-coil domains 1	human	SPECC1
ZBP1	TIS up	1.21127	3.42385e-05	81030	Z-DNA binding protein 1	human	ZBP1
LIF	TIS up	1.20441	0.000476636	3976	LIF, interleukin 6 family cytokine	human	LIF
ID1	TIS up	1.20353	0.00134782	3397	inhibitor of DNA binding 1, HLH protein	human	ID1
GSTM5	TIS up	1.20261	0.000185354	2949	glutathione S-transferase mu 5	human	GSTM5
AOAH	TIS up	1.20198	0.00242592	313	acyloxyacyl hydrolase	human	AOAH
TMEM86A	TIS up	1.20017	3.07214e-06	144110	transmembrane protein 86A	human	TMEM86A
NDRG4	TIS up	1.1994	1.9266e-05	65009	NDRG family member 4	human	NDRG4
HMOX1	TIS up	1.19835	0.00584036	3162	heme oxygenase 1	human	HMOX1
DPP7	TIS up	1.19658	0.000113139	29952	dipeptidyl peptidase 7	human	DPP7
PCDH7	TIS up	1.19231	8.93036e-05	5099	protocadherin 7	human	PCDH7
C20orf194	TIS up	1.19168	1.40651e-06	25943	chromosome 20 open reading frame 194	human	C20orf194
SRXN1	TIS up	1.19141	8.07875e-05	140809	sulfiredoxin 1	human	SRXN1
GAS1	TIS up	1.19113	0.000203681	2619	growth arrest specific 1	human	GAS1
CHI3L1	TIS up	1.19112	0.000100719	1116	chitinase 3 like 1	human	CHI3L1
STEAP2	TIS up	1.19	0.00555959	261729	STEAP2 metalloreductase	human	STEAP2
RND3	TIS up	1.18784	0.000651533	390	Rho family GTPase 3	human	RND3
SEZ6L2	TIS up	1.18676	0.000215567	26470	seizure related 6 homolog like 2	human	SEZ6L2
DEGS1	TIS up	1.18623	3.95738e-08	8560	delta 4-desaturase, sphingolipid 1	human	DEGS1
SDC2	TIS up	1.18352	0.000185136	6383	syndecan 2	human	SDC2
IRF7	TIS up	1.18163	0.000424618	3665	interferon regulatory factor 7	human	IRF7
PALLD	TIS up	1.18162	0.000903622	23022	palladin, cytoskeletal associated protein	human	PALLD
SLC37A2	TIS up	1.18016	3.61463e-06	219855	solute carrier family 37 member 2	human	SLC37A2
CSTB	TIS up	1.17772	1.25459e-06	1476	cystatin B	human	CSTB
CDH2	TIS up	1.17733	0.000461865	1000	cadherin 2	human	CDH2
CSF2RA	TIS up	1.17641	0.000179521	1438	colony stimulating factor 2 receptor alpha subunit	human	CSF2RA
PDK4	TIS up	1.17569	5.35721e-05	5166	pyruvate dehydrogenase kinase 4	human	PDK4
GPR35	TIS up	1.1753	4.74057e-07	2859	G protein-coupled receptor 35	human	GPR35
CYB5R3	TIS up	1.1731	3.14696e-06	1727	cytochrome b5 reductase 3	human	CYB5R3
ANKRD1	TIS up	1.17152	0.0008672	27063	ankyrin repeat domain 1	human	ANKRD1
OPTN	TIS up	1.17121	0.00196424	10133	optineurin	human	OPTN
ATF3	TIS up	1.1694	0.000326975	467	activating transcription factor 3	human	ATF3
CD274	TIS up	1.16928	2.55676e-05	29126	CD274 molecule	human	CD274
LPAR1	TIS up	1.16868	0.000201629	1902	lysophosphatidic acid receptor 1	human	LPAR1
GSTO2	TIS up	1.16618	7.24624e-05	119391	glutathione S-transferase omega 2	human	GSTO2
PILRB	TIS up	1.16556	0.000510081	29990	paired immunoglobin-like type 2 receptor beta	human	PILRB
APBB2	TIS up	1.1644	0.000514316	323	amyloid beta precursor protein binding family B member 2	human	APBB2
MGST1	TIS up	1.16364	0.00442207	4257	microsomal glutathione S-transferase 1	human	MGST1
CPEB4	TIS up	1.16345	4.7135e-06	80315	cytoplasmic polyadenylation element binding protein 4	human	CPEB4
RAB7B	TIS up	1.16307	0.00331988	338382	RAB7B, member RAS oncogene family	human	RAB7B
MDM2	TIS up	1.16258	2.36025e-07	4193	MDM2 proto-oncogene	human	MDM2
MEG3	TIS up	1.16041	0.00126533	55384	maternally expressed 3 (non-protein coding)	human	MEG3
SLC6A8	TIS up	1.14679	3.2631e-05	6535	solute carrier family 6 member 8	human	SLC6A8
AKR1B10	TIS up	1.14644	0.00758207	57016	aldo-keto reductase family 1 member B10	human	AKR1B10
CDKN1A	TIS up	1.14632	0.0001476	1026	cyclin dependent kinase inhibitor 1A	human	CDKN1A
FAM114A1	TIS up	1.14465	0.000116784	92689	family with sequence similarity 114 member A1	human	FAM114A1
CLMP	TIS up	1.14301	0.000123755	79827	CXADR like membrane protein	human	CLMP
ENO2	TIS up	1.14253	0.000135872	2026	enolase 2	human	ENO2
SNX7	TIS up	1.14103	0.000392785	51375	sorting nexin 7	human	SNX7
POR	TIS up	1.14101	1.65606e-06	5447	cytochrome p450 oxidoreductase	human	POR
DHRS3	TIS up	1.14039	0.000759355	9249	dehydrogenase/reductase 3	human	DHRS3
IMPACT	TIS up	1.13909	1.91535e-08	55364	impact RWD domain protein	human	IMPACT
TNF	TIS up	1.13753	0.000140495	7124	tumor necrosis factor	human	TNF
GAS2L1	TIS up	1.13736	0.000437029	10634	growth arrest specific 2 like 1	human	GAS2L1
SLC6A12	TIS up	1.137	3.54934e-05	6539	solute carrier family 6 member 12	human	SLC6A12
CPQ	TIS up	1.13392	0.00406452	10404	carboxypeptidase Q	human	CPQ
RHOU	TIS up	1.13192	1.99058e-05	58480	ras homolog family member U	human	RHOU
GRN	TIS up	1.12936	5.54688e-05	2896	granulin precursor	human	GRN
FGFR1	TIS up	1.12875	0.000258807	2260	fibroblast growth factor receptor 1	human	FGFR1
MX1	TIS up	1.12839	0.00427236	4599	MX dynamin like GTPase 1	human	MX1
TJP1	TIS up	1.12714	0.00173271	7082	tight junction protein 1	human	TJP1
C11orf88	TIS up	1.12647	0.000313519	399949	chromosome 11 open reading frame 88	human	C11orf88
SOCS5	TIS up	1.12486	2.80122e-05	9655	suppressor of cytokine signaling 5	human	SOCS5
FCGR2A	TIS up	1.1246	0.000380303	2212	Fc fragment of IgG receptor IIa	human	FCGR2A
FLNA	TIS up	1.12447	1.26791e-05	2316	filamin A	human	FLNA
CMTM3	TIS up	1.12397	0.000153504	123920	CKLF like MARVEL transmembrane domain containing 3	human	CMTM3
ANKH	TIS up	1.12146	6.20238e-08	56172	ANKH inorganic pyrophosphate transport regulator	human	ANKH
NPDC1	TIS up	1.12056	0.000139591	56654	neural proliferation, differentiation and control 1	human	NPDC1
GAB2	TIS up	1.11268	0.00891124	9846	GRB2 associated binding protein 2	human	GAB2
P4HA2	TIS up	1.11204	0.00852477	8974	prolyl 4-hydroxylase subunit alpha 2	human	P4HA2
COX6B2	TIS up	1.11162	0.0073467	125965	cytochrome c oxidase subunit 6B2	human	COX6B2
GJC1	TIS up	1.10583	0.000417882	10052	gap junction protein gamma 1	human	GJC1
TAX1BP3	TIS up	1.10358	0.000648636	30851	Tax1 binding protein 3	human	TAX1BP3
UCHL1	TIS up	1.10331	0.00643234	7345	ubiquitin C-terminal hydrolase L1	human	UCHL1
LY96	TIS up	1.10276	1.44379e-05	23643	lymphocyte antigen 96	human	LY96
NAGK	TIS up	1.10271	0.000111917	55577	N-acetylglucosamine kinase	human	NAGK
CCDC80	TIS up	1.1017	5.25543e-05	151887	coiled-coil domain containing 80	human	CCDC80
CYP2C18	TIS up	1.09896	0.00327935	1562	cytochrome P450 family 2 subfamily C member 18	human	CYP2C18
PDGFC	TIS up	1.09852	0.000773847	56034	platelet derived growth factor C	human	PDGFC
RIN1	TIS up	1.0978	0.000227633	9610	Ras and Rab interactor 1	human	RIN1
ANXA5	TIS up	1.09677	0.00101784	308	annexin A5	human	ANXA5
CNDP2	TIS up	1.09416	2.83557e-06	55748	carnosine dipeptidase 2	human	CNDP2
FEZ1	TIS up	1.08841	0.000551231	9638	fasciculation and elongation protein zeta 1	human	FEZ1
FAS	TIS up	1.08553	3.99694e-05	355	Fas cell surface death receptor	human	FAS
RNF149	TIS up	1.08464	0.000109773	284996	ring finger protein 149	human	RNF149
FAM20C	TIS up	1.08347	0.00080908	56975	FAM20C, golgi associated secretory pathway kinase	human	FAM20C
SLIT2	TIS up	1.08297	0.000911076	9353	slit guidance ligand 2	human	SLIT2
PTGFRN	TIS up	1.08265	0.00284156	5738	prostaglandin F2 receptor inhibitor	human	PTGFRN
TPP1	TIS up	1.0811	2.1291e-10	1200	tripeptidyl peptidase 1	human	TPP1
PLB1	TIS up	1.08033	2.20714e-06	151056	phospholipase B1	human	PLB1
ATP6V0C	TIS up	1.07761	1.45687e-07	527	ATPase H+ transporting V0 subunit c	human	ATP6V0C
HIST1H2BI	TIS up	1.07615	0.000102444	8346	histone cluster 1 H2B family member i	human	HIST1H2BI
XAF1	TIS up	1.07305	0.00355163	54739	XIAP associated factor 1	human	XAF1
PSEN2	TIS up	1.06968	3.17251e-06	5664	presenilin 2	human	PSEN2
LTBP2	TIS up	1.06875	0.000300488	4053	latent transforming growth factor beta binding protein 2	human	LTBP2
ZBTB4	TIS up	1.06849	5.21883e-07	57659	zinc finger and BTB domain containing 4	human	ZBTB4
P3H4	TIS up	1.06835	0.0002424	10609	prolyl 3-hydroxylase family member 4 (non-enzymatic)	human	P3H4
CD80	TIS up	1.06677	0.000248455	941	CD80 molecule	human	CD80
GSN	TIS up	1.06667	0.00805779	2934	gelsolin	human	GSN
ST3GAL2	TIS up	1.06561	8.77361e-05	6483	ST3 beta-galactoside alpha-2,3-sialyltransferase 2	human	ST3GAL2
ASB2	TIS up	1.06552	0.00429111	51676	ankyrin repeat and SOCS box containing 2	human	ASB2
ARL8A	TIS up	1.06385	1.47023e-11	127829	ADP ribosylation factor like GTPase 8A	human	ARL8A
NAB2	TIS up	1.0634	1.1463e-06	4665	NGFI-A binding protein 2	human	NAB2
ZSWIM8	TIS up	1.06263	1.73811e-10	23053	zinc finger SWIM-type containing 8	human	ZSWIM8
TRIP6	TIS up	1.0615	3.46519e-06	7205	thyroid hormone receptor interactor 6	human	TRIP6
SELENOP	TIS up	1.0614	0.00352454	6414	selenoprotein P	human	SELENOP
JDP2	TIS up	1.06126	0.00720765	122953	Jun dimerization protein 2	human	JDP2
LPP	TIS up	1.06078	0.00286561	4026	LIM domain containing preferred translocation partner in lipoma	human	LPP
MYO1B	TIS up	1.06016	0.00114441	4430	myosin IB	human	MYO1B
NPR2	TIS up	1.05974	1.05014e-05	4882	natriuretic peptide receptor 2	human	NPR2
PCDH19	TIS up	1.05745	0.00162461	57526	protocadherin 19	human	PCDH19
GSAP	TIS up	1.05645	1.5422e-06	54103	gamma-secretase activating protein	human	GSAP
CD38	TIS up	1.05594	0.00474721	952	CD38 molecule	human	CD38
MSR1	TIS up	1.0556	0.00379198	4481	macrophage scavenger receptor 1	human	MSR1
SLC43A2	TIS up	1.05226	1.0959e-05	124935	solute carrier family 43 member 2	human	SLC43A2
LACC1	TIS up	1.04964	3.51754e-05	144811	laccase domain containing 1	human	LACC1
IGF2R	TIS up	1.04738	4.33432e-08	3482	insulin like growth factor 2 receptor	human	IGF2R
DUBR	TIS up	1.04722	0.000751419	344595	DPPA2 upstream binding RNA	human	DUBR
TRAFD1	TIS up	1.04676	5.76051e-07	10906	TRAF-type zinc finger domain containing 1	human	TRAFD1
MAP4K3	TIS up	1.04661	9.644e-05	8491	mitogen-activated protein kinase kinase kinase kinase 3	human	MAP4K3
UGDH	TIS up	1.04409	0.00030499	7358	UDP-glucose 6-dehydrogenase	human	UGDH
OAS2	TIS up	1.0439	0.000286111	4939	2'-5'-oligoadenylate synthetase 2	human	OAS2
CLCN7	TIS up	1.04087	4.21972e-09	1186	chloride voltage-gated channel 7	human	CLCN7
PTGIS	TIS up	1.04019	0.000471049	5740	prostaglandin I2 synthase	human	PTGIS
SAMD4A	TIS up	1.03956	0.00104767	23034	sterile alpha motif domain containing 4A	human	SAMD4A
MAGED1	TIS up	1.03852	0.00241998	9500	MAGE family member D1	human	MAGED1
CORO1B	TIS up	1.03818	1.55682e-06	57175	coronin 1B	human	CORO1B
CEBPB	TIS up	1.03778	0.000143146	1051	CCAAT enhancer binding protein beta	human	CEBPB
IL1A	TIS up	1.03694	0.00556342	3552	interleukin 1 alpha	human	IL1A
LST1	TIS up	1.02843	0.00412421	7940	leukocyte specific transcript 1	human	LST1
GLA	TIS up	1.027	1.48305e-05	2717	galactosidase alpha	human	GLA
PBXIP1	TIS up	1.02667	0.000164616	57326	PBX homeobox interacting protein 1	human	PBXIP1
RUNX2	TIS up	1.02539	0.00701121	860	runt related transcription factor 2	human	RUNX2
ETS2	TIS up	1.02432	0.00010584	2114	ETS proto-oncogene 2, transcription factor	human	ETS2
EMP2	TIS up	1.02425	0.00122072	2013	epithelial membrane protein 2	human	EMP2
B3GALNT1	TIS up	1.02225	0.00509424	8706	beta-1,3-N-acetylgalactosaminyltransferase 1 (globoside blood group)	human	B3GALNT1
ALDH3A1	TIS up	1.0203	0.00202952	218	aldehyde dehydrogenase 3 family member A1	human	ALDH3A1
CAPN2	TIS up	1.02028	0.00508044	824	calpain 2	human	CAPN2
SLC4A2	TIS up	1.0194	1.06667e-08	6522	solute carrier family 4 member 2	human	SLC4A2
COL8A1	TIS up	1.01808	0.000455194	1295	collagen type VIII alpha 1 chain	human	COL8A1
SBNO2	TIS up	1.01474	5.93977e-07	22904	strawberry notch homolog 2	human	SBNO2
MFAP5	TIS up	1.01471	0.000285352	8076	microfibril associated protein 5	human	MFAP5
VGLL3	TIS up	1.01393	0.00233543	389136	vestigial like family member 3	human	VGLL3
TBC1D9	TIS up	1.01233	1.87555e-06	23158	TBC1 domain family member 9	human	TBC1D9
AP1S2	TIS up	1.01128	3.3823e-05	8905	adaptor related protein complex 1 sigma 2 subunit	human	AP1S2
PLEK	TIS up	1.00951	0.000510081	5341	pleckstrin	human	PLEK
IL18	TIS up	1.00945	0.00359786	3606	interleukin 18	human	IL18
GBA	TIS up	1.00858	1.11767e-07	2629	glucosylceramidase beta	human	GBA
P2RX7	TIS up	1.00463	8.97225e-07	5027	purinergic receptor P2X 7	human	P2RX7
SLC41A2	TIS up	1.00168	0.00106614	84102	solute carrier family 41 member 2	human	SLC41A2

## Sheet: S1B - Results
Supplementary Data 1B displays the network results obtained using the input gene list from worksheet "S1A - Input" and performing an induced network modules analysis via ConsensusPathDB.
interactorA_cpdbID	interactorA_name	interactorA_type	interactorA_externalIdentifiers	interactorA_role	interactorB_cpdbID	interactorB_name	interactorB_type	interactorB_externalIdentifiers	interactorB_role	interaction_cpdbIDs	interaction_type	interaction_sourceDBs	interaction_pubmedIds
4176580	AP-1_I.complex	protein		transcription factor	249771	CEBPB	gene	ensembl:ENSP00000305422;entrez-gene:1051;hgnc-id:1834;hprd:01801;refseq:NC_000020;refseq:NM_001285878;refseq:NM_001285879;refseq:NM_005194;refseq:NP_001272807;refseq:NP_001272808;refseq:NP_005185;uniprot:P17676	transcribed gene	652325	gene regulatory interaction	Spike	12215258
15482	SPI1 Gene	protein	dip:DIP-953N;ensembl:ENSG00000066336;ensembl:ENSP00000227163;ensembl:ENSP00000367799;ensembl:ENST00000227163;ensembl:ENST00000378538;entrez-gene:6688;hgnc-id:11241;hgnc-symbol:SPI1;hprd:01305;intact:EBI-2293548;reactome:R-HSA-8865489;reactome:R-HSA-8865503;reactome:R-HSA-8939236;reactome:R-HSA-9616222;refseq:NC_000011;refseq:NM_001080547;refseq:NM_003120;refseq:NP_001074016;refseq:NP_003111;unipr…	transcription factor	246603	SLC11A1	gene	ensembl:ENSG00000018280;entrez-gene:6556;hgnc-symbol:SLC11A1;uniprot:P49279	transcribed gene	33841	gene regulatory interaction	PID	15506972;18045875
11985	HDAC4	protein	chembl:3524;dip:DIP-34565N;ensembl:ENSG00000068024;ensembl:ENSP00000264606;ensembl:ENST00000345617;entrez-gene:9759;hgnc-id:14063;hgnc-symbol:HDAC4;hprd:05610;humancyc:HS00927-MONOMER;intact:EBI-308629;pdb:2H8N;pdb:2O94;pdb:2VQJ;pdb:2VQM;pdb:2VQO;pdb:2VQQ;pdb:2VQV;pdb:2VQW;pdb:3UXG;pdb:3UZD;pdb:3V31;pdb:4CBT;pdb:4CBY;pdb:5A2S;pdb:5ZOO;pdb:5ZOP;pdb:6FYZ;reactome:R-HSA-2122947;reactome:R-HSA-264460…	repressor	233428	CDKN1A	gene	ensembl:ENSG00000124762;ensembl:ENSP00000244741;ensembl:ENSP00000384849;ensembl:ENSP00000409259;ensembl:ENSP00000482768;entrez-gene:1026;hgnc-id:1784;hgnc-symbol:CDKN1A;hprd:00298;intact:EBI-1550784;refseq:NC_000006;refseq:NM_000389;refseq:NM_001220777;refseq:NM_001220778;refseq:NM_001291549;refseq:NM_078467;refseq:NP_000380;refseq:NP_001207706;refseq:NP_001207707;refseq:NP_001278478;refseq:NP_00…	transcribed gene	650959	gene regulatory interaction	Spike	18632985;18850004
51166	MMP12	protein	chembl:4393;ensembl:ENSG00000110347;ensembl:ENSG00000262406;ensembl:ENSP00000458585;ensembl:ENST00000571244;entrez-gene:4321;hgnc-id:7158;hgnc-symbol:MMP12;hprd:03027;humancyc:HS03303-MONOMER;intact:EBI-7881912;intact:MINT-7709562;pdb:1JIZ;pdb:1JK3;pdb:1OS2;pdb:1OS9;pdb:1RMZ;pdb:1ROS;pdb:1UTT;pdb:1UTZ;pdb:1Y93;pdb:1YCM;pdb:1Z3J;pdb:2HU6;pdb:2JXY;pdb:2K2G;pdb:2K9C;pdb:2KRJ;pdb:2MLR;pdb:2MLS;pdb:2N…	transcription factor	435080	CCL7	gene	ensembl:ENSG00000108688;ensembl:ENSP00000367832;entrez-gene:6354;hgnc-id:10634;hgnc-symbol:CCL7;hprd:01150;intact:EBI-26478626;refseq:NM_006273;refseq:NP_006264;uniprot:P80098	transcribed gene	59173	gene regulatory interaction	InnateDB	18660381
15482	SPI1 Gene	protein	dip:DIP-953N;ensembl:ENSG00000066336;ensembl:ENSP00000227163;ensembl:ENSP00000367799;ensembl:ENST00000227163;ensembl:ENST00000378538;entrez-gene:6688;hgnc-id:11241;hgnc-symbol:SPI1;hprd:01305;intact:EBI-2293548;reactome:R-HSA-8865489;reactome:R-HSA-8865503;reactome:R-HSA-8939236;reactome:R-HSA-9616222;refseq:NC_000011;refseq:NM_001080547;refseq:NM_003120;refseq:NP_001074016;refseq:NP_003111;unipr…	transcription factor	33700	PTGIR	protein	chembl:1995;ensembl:ENSG00000160013;ensembl:ENSP00000291294;ensembl:ENST00000291294;entrez-gene:5739;hgnc-id:9602;hgnc-symbol:PTGIR;hprd:08959;intact:EBI-21748840;reactome:R-HSA-391834;reactome:R-HSA-391908;reactome:R-HSA-392851;reactome:R-HSA-418555;reactome:R-HSA-9660821;refseq:NM_000960;refseq:NP_000951;refseq:XM_005259093;refseq:XM_005259095;uniprot:P43119;uniprot:PI2R_HUMAN	product	651853	gene regulatory interaction	Spike	19118563
4176580	AP-1_I.complex	protein		transcription factor	17724	IL6	protein	dip:DIP-482N;ensembl:ENSG00000136244;ensembl:ENSP00000258743;ensembl:ENSP00000385675;ensembl:ENST00000258743;ensembl:ENST00000404625;entrez-gene:3569;hgnc-id:6018;hgnc-symbol:IL6;hprd:00970;intact:EBI-720533;pdb:1ALU;pdb:1IL6;pdb:1N2Q;pdb:1P9M;pdb:2IL6;pdb:4CNI;pdb:4J4L;pdb:4NI7;pdb:4NI9;pdb:4O9H;pdb:4ZS7;pdb:5FUC;reactome:R-HSA-1059683;reactome:R-HSA-110056;reactome:R-HSA-112411;reactome:R-HSA-2…	product	651900	gene regulatory interaction	Spike	10405202;11028561;12626566;12727841;19251936
4176476	NFkB.complex	protein		transcription factor	235895	IL1B	gene	ensembl:ENSG00000125538;ensembl:ENSP00000263341;entrez-gene:3553;hgnc-id:5992;hprd:00985;intact:EBI-26484208;refseq:NC_000002;refseq:NM_000576;refseq:NP_000567;refseq:XM_006712496;uniprot:P01584	transcribed gene	650723	gene regulatory interaction	Spike	8021507;8413223
232859	STAT1-3 (dimer)	group		transcription factor	232598	TNF	gene	ensembl:ENSG00000204490;ensembl:ENSG00000206439;ensembl:ENSG00000223952;ensembl:ENSG00000228321;ensembl:ENSG00000228849;ensembl:ENSG00000230108;ensembl:ENSG00000232810;ensembl:ENSP00000398698;entrez-gene:7124;hgnc-id:11892;hgnc-symbol:TNF;hprd:01855;intact:EBI-26489272;refseq:NC_000006;refseq:NM_000594;refseq:NP_000585;uniprot:P01375	transcribed gene	35947	gene regulatory interaction	PID	14764690
15482	SPI1 Gene	protein	dip:DIP-953N;ensembl:ENSG00000066336;ensembl:ENSP00000227163;ensembl:ENSP00000367799;ensembl:ENST00000227163;ensembl:ENST00000378538;entrez-gene:6688;hgnc-id:11241;hgnc-symbol:SPI1;hprd:01305;intact:EBI-2293548;reactome:R-HSA-8865489;reactome:R-HSA-8865503;reactome:R-HSA-8939236;reactome:R-HSA-9616222;refseq:NC_000011;refseq:NM_001080547;refseq:NM_003120;refseq:NP_001074016;refseq:NP_003111;unipr…	transcription factor	3005097	CYBB	gene	ensembl:ENSP00000367851;entrez-gene:1536;hgnc-id:2578;hprd:02382;refseq:NM_000397;refseq:NP_000388;uniprot:P04839	transcribed gene	651713	gene regulatory interaction	Spike	10233904
431693	CD68	gene	ensembl:ENSG00000129226;entrez-gene:968;hgnc-symbol:CD68;refseq:NM_001251	transcribed gene	133810	CD68	protein	ensembl:ENSG00000129226;ensembl:ENSP00000250092;ensembl:ENSP00000369867;ensembl:ENST00000250092;ensembl:ENST00000380498;entrez-gene:968;hgnc-id:1693;hprd:01093;intact:EBI-2826276;reactome:R-HSA-6798695;reactome:R-HSA-6806033;reactome:R-HSA-6806163;refseq:NM_001040059;refseq:NM_001251;refseq:NP_001035148;refseq:NP_001242;uniprot:B4DVT4;uniprot:CD68_HUMAN;uniprot:P34810;uniprot:Q53HR6;uniprot:Q53XI…	product	638687;652279	gene regulatory interaction	BIND;Spike	12676954;14988562
74575	CSF2RB	protein	dip:DIP-127N;ensembl:ENSG00000100368;ensembl:ENSP00000384053;ensembl:ENSP00000385271;ensembl:ENST00000403662;ensembl:ENST00000406230;entrez-gene:1439;hgnc-id:2436;hgnc-symbol:CSF2RB;hprd:00739;intact:EBI-1809771;pdb:1C8P;pdb:1EGJ;pdb:1GH7;pdb:2GYS;pdb:2NA8;pdb:2NA9;pdb:4NKQ;pdb:5DWU;reactome:R-HSA-512988;reactome:R-HSA-5673001;reactome:R-HSA-5683826;reactome:R-HSA-5688849;reactome:R-HSA-5688863;r…	transcription factor	74588	CSF2RA	protein	dip:DIP-635N;ensembl:ENSG00000198223;ensembl:ENSP00000347606;ensembl:ENSP00000348058;ensembl:ENSP00000370911;ensembl:ENSP00000370920;ensembl:ENSP00000370935;ensembl:ENSP00000370940;ensembl:ENSP00000394227;ensembl:ENSP00000416437;ensembl:ENSP00000440491;ensembl:ENST00000355432;ensembl:ENST00000355805;ensembl:ENST00000381500;ensembl:ENST00000381509;ensembl:ENST00000381524;ensembl:ENST00000381529;en…	transcription factor	51877;55596	gene regulatory interaction	InnateDB	10572088;18322230
4176476	NFkB.complex	protein		transcription factor	55165	IL10	protein	dip:DIP-3511N;ensembl:ENSG00000136634;ensembl:ENSP00000412237;ensembl:ENST00000423557;entrez-gene:3586;hgnc-id:5962;hgnc-symbol:IL10;hprd:00495;intact:EBI-1031632;pdb:1ILK;pdb:1INR;pdb:1J7V;pdb:1LK3;pdb:1Y6K;pdb:2H24;pdb:2ILK;reactome:R-HSA-447125;reactome:R-HSA-6783783;reactome:R-HSA-6785807;reactome:R-HSA-6790020;reactome:R-HSA-8950505;reactome:R-HSA-9662834;reactome:R-HSA-9664323;refseq:NM_000…	product	650716	gene regulatory interaction	Spike	8704212
238097	SMAD3/SMAD4/SP1	complex		transcription factor	233428	CDKN1A	gene	ensembl:ENSG00000124762;ensembl:ENSP00000244741;ensembl:ENSP00000384849;ensembl:ENSP00000409259;ensembl:ENSP00000482768;entrez-gene:1026;hgnc-id:1784;hgnc-symbol:CDKN1A;hprd:00298;intact:EBI-1550784;refseq:NC_000006;refseq:NM_000389;refseq:NM_001220777;refseq:NM_001220778;refseq:NM_001291549;refseq:NM_078467;refseq:NP_000380;refseq:NP_001207706;refseq:NP_001207707;refseq:NP_001278478;refseq:NP_00…	transcribed gene	36412	gene regulatory interaction	PID	10878024;9618481
441476	NQO1	gene	ensembl:ENSG00000181019;ensembl:ENSP00000319788;ensembl:ENSP00000368335;entrez-gene:1728;hgnc-id:2874;hgnc-symbol:NQO1;hprd:00518;refseq:NC_000016;refseq:NM_000903;refseq:NM_001025433;refseq:NM_001025434;refseq:NM_001286137;refseq:NP_000894;refseq:NP_001020604;refseq:NP_001020605;refseq:NP_001273066;uniprot:P15559	transcribed gene	141801	NQO1	protein	chembl:3623;dip:DIP-24210N;ensembl:ENSG00000181019;ensembl:ENSP00000319788;ensembl:ENSP00000368334;ensembl:ENSP00000368335;ensembl:ENST00000320623;ensembl:ENST00000379046;ensembl:ENST00000379047;entrez-gene:1728;hgnc-id:2874;hgnc-symbol:NQO1;hprd:00518;humancyc:HS11566-MONOMER;intact:EBI-3989435;kegg:hsa:1728;pdb:1D4A;pdb:1DXO;pdb:1GG5;pdb:1H66;pdb:1H69;pdb:1KBO;pdb:1KBQ;pdb:1QBG;pdb:2F1O;pdb:3JS…	product	640734;650782;651701;651747	gene regulatory interaction	BIND;Spike	15734732;15988478;18241676;18535259;8962164
236686	MMP9	gene	ensembl:ENSG00000100985;entrez-gene:4318;intact:EBI-2677274;uniprot:P14780	transcribed gene	51150	MMP9	protein	chembl:321;dip:DIP-29518N;ensembl:ENSG00000100985;ensembl:ENSP00000361405;ensembl:ENST00000372330;entrez-gene:4318;hgnc-id:7176;hgnc-symbol:MMP9;hprd:00387;humancyc:HS02175-MONOMER;intact:EBI-1382326;pdb:1GKC;pdb:1GKD;pdb:1ITV;pdb:1L6J;pdb:1LKG;pdb:2OVX;pdb:2OVZ;pdb:2OW0;pdb:2OW1;pdb:2OW2;pdb:4H1Q;pdb:4H2E;pdb:4H3X;pdb:4H82;pdb:4HMA;pdb:4JIJ;pdb:4JQG;pdb:4WZV;pdb:4XCT;pdb:5CUH;pdb:5I12;pdb:5TH6;p…	product	32639;34543;34817;35089;35452;35555;36367;651861;652223;652230	gene regulatory interaction	PID;Spike	10022836;12398894;12816956;15169910;15608675;15630457;15894584;16474180;16554298;16691505;17005551;17306568;17409417;18976709;19208844;20392257;4565943;9585425
15482	SPI1 Gene	protein	dip:DIP-953N;ensembl:ENSG00000066336;ensembl:ENSP00000227163;ensembl:ENSP00000367799;ensembl:ENST00000227163;ensembl:ENST00000378538;entrez-gene:6688;hgnc-id:11241;hgnc-symbol:SPI1;hprd:01305;intact:EBI-2293548;reactome:R-HSA-8865489;reactome:R-HSA-8865503;reactome:R-HSA-8939236;reactome:R-HSA-9616222;refseq:NC_000011;refseq:NM_001080547;refseq:NM_003120;refseq:NP_001074016;refseq:NP_003111;unipr…	transcription factor	93421	ITGAM	protein	ensembl:ENSG00000169896;ensembl:ENSP00000441691;ensembl:ENSP00000496959;ensembl:ENST00000544665;ensembl:ENST00000648685;entrez-gene:3684;hgnc-id:6149;hgnc-symbol:ITGAM;hprd:00411;intact:EBI-2568251;pdb:1A8X;pdb:1BHO;pdb:1BHQ;pdb:1IDN;pdb:1IDO;pdb:1JLM;pdb:1M1U;pdb:1MF7;pdb:1N9Z;pdb:1NA5;pdb:2LKE;pdb:2LKJ;pdb:3Q3G;pdb:3QA3;pdb:4M76;pdb:4XW2;pdb:6RHW;reactome:R-HSA-166016;reactome:R-HSA-202733;reac…	product	650987	gene regulatory interaction	Spike	15676205;8095266
4176476	NFkB.complex	protein		transcription factor	17724	IL6	protein	dip:DIP-482N;ensembl:ENSG00000136244;ensembl:ENSP00000258743;ensembl:ENSP00000385675;ensembl:ENST00000258743;ensembl:ENST00000404625;entrez-gene:3569;hgnc-id:6018;hgnc-symbol:IL6;hprd:00970;intact:EBI-720533;pdb:1ALU;pdb:1IL6;pdb:1N2Q;pdb:1P9M;pdb:2IL6;pdb:4CNI;pdb:4J4L;pdb:4NI7;pdb:4NI9;pdb:4O9H;pdb:4ZS7;pdb:5FUC;reactome:R-HSA-1059683;reactome:R-HSA-110056;reactome:R-HSA-112411;reactome:R-HSA-2…	product	650990	gene regulatory interaction	Spike	10501190;1644898;2183031
17735	CEBPB	protein	dip:DIP-35345N;ensembl:ENSG00000172216;ensembl:ENSP00000305422;ensembl:ENST00000303004;entrez-gene:1051;hgnc-id:1834;hgnc-symbol:CEBPB;hprd:01801;intact:EBI-969696;pdb:1GTW;pdb:1GU4;pdb:1GU5;pdb:1H88;pdb:1H89;pdb:1H8A;pdb:1HJB;pdb:1IO4;pdb:2E42;pdb:2E43;pdb:6MG1;pdb:6MG2;pdb:6MG3;reactome:R-HSA-2559582;reactome:R-HSA-380994;reactome:R-HSA-381340;reactome:R-HSA-381378;reactome:R-HSA-3857339;reacto…	transcription factor	237384	IL6	gene	ensembl:ENSG00000136244;ensembl:ENSP00000258743;entrez-gene:3569;hgnc-id:6018;hgnc-symbol:IL6;hprd:00970;intact:EBI-11316349;refseq:NM_000600;refseq:NP_000591;refseq:XM_005249745;refseq:XP_011513692;uniprot:P05231	product	57986	gene regulatory interaction	InnateDB;IntAct	12706815;24012417;27577074
15482	SPI1 Gene	protein	dip:DIP-953N;ensembl:ENSG00000066336;ensembl:ENSP00000227163;ensembl:ENSP00000367799;ensembl:ENST00000227163;ensembl:ENST00000378538;entrez-gene:6688;hgnc-id:11241;hgnc-symbol:SPI1;hprd:01305;intact:EBI-2293548;reactome:R-HSA-8865489;reactome:R-HSA-8865503;reactome:R-HSA-8939236;reactome:R-HSA-9616222;refseq:NC_000011;refseq:NM_001080547;refseq:NM_003120;refseq:NP_001074016;refseq:NP_003111;unipr…	transcription factor	4300539	ITGAM	gene	entrez-gene:3684	transcribed gene	650987	gene regulatory interaction	Spike	15676205;8095266
4176580	AP-1_I.complex	protein		transcription factor	241450	IL10	gene	ensembl:ENSG00000136634;ensembl:ENSP00000412237;entrez-gene:3586;hgnc-id:5962;hprd:00495;intact:EBI-9975278;refseq:NM_000572;refseq:NP_000563;uniprot:P22301	transcribed gene	652104	gene regulatory interaction	Spike	12649301
15482	SPI1 Gene	protein	dip:DIP-953N;ensembl:ENSG00000066336;ensembl:ENSP00000227163;ensembl:ENSP00000367799;ensembl:ENST00000227163;ensembl:ENST00000378538;entrez-gene:6688;hgnc-id:11241;hgnc-symbol:SPI1;hprd:01305;intact:EBI-2293548;reactome:R-HSA-8865489;reactome:R-HSA-8865503;reactome:R-HSA-8939236;reactome:R-HSA-9616222;refseq:NC_000011;refseq:NM_001080547;refseq:NM_003120;refseq:NP_001074016;refseq:NP_003111;unipr…	transcription factor	431693	CD68	gene	ensembl:ENSG00000129226;entrez-gene:968;hgnc-symbol:CD68;refseq:NM_001251	transcribed gene	53284	gene regulatory interaction	InnateDB	12676954
15482	SPI1 Gene	protein	dip:DIP-953N;ensembl:ENSG00000066336;ensembl:ENSP00000227163;ensembl:ENSP00000367799;ensembl:ENST00000227163;ensembl:ENST00000378538;entrez-gene:6688;hgnc-id:11241;hgnc-symbol:SPI1;hprd:01305;intact:EBI-2293548;reactome:R-HSA-8865489;reactome:R-HSA-8865503;reactome:R-HSA-8939236;reactome:R-HSA-9616222;refseq:NC_000011;refseq:NM_001080547;refseq:NM_003120;refseq:NP_001074016;refseq:NP_003111;unipr…	transcription factor	530284	KLF4	gene	ensembl:ENSG00000136826;entrez-gene:9314;intact:EBI-11177920;refseq:NP_004226;refseq:XP_005252362	transcribed gene	71930	gene regulatory interaction	IntAct	17762869
4176476	NFkB.complex	protein		transcription factor	247782	MMP14	gene	ensembl:ENSP00000308208;entrez-gene:4323;hgnc-id:7160;hprd:02856;refseq:NC_000014;refseq:NM_004995;refseq:NP_004986;uniprot:P50281	transcribed gene	652074	gene regulatory interaction	Spike	11112697
231345	COL1A2	gene	ensembl:ENSG00000164692;ensembl:ENSP00000297268;entrez-gene:1278;hgnc-id:2198;hgnc-symbol:COL1A2;hprd:00363;intact:EBI-9095879;refseq:NM_000089;refseq:NP_000080;uniprot:P08123	transcribed gene	70793	COL1A2	protein	dip:DIP-36079N;ensembl:ENSG00000164692;ensembl:ENSP00000297268;ensembl:ENST00000297268;entrez-gene:1278;hgnc-id:2198;hprd:00363;intact:EBI-9095879;intact:EBI-923254;intact:EBI-983038;pdb:5CTD;pdb:5CTI;pdb:5CVA;pdb:6JEC;reactome:R-HSA-114604;reactome:R-HSA-141093;reactome:R-HSA-1442490;reactome:R-HSA-1474244;reactome:R-HSA-1650814;reactome:R-HSA-1980213;reactome:R-HSA-198933;reactome:R-HSA-2022070…	product	33029;33091;33426;34023;34721;34728;34998;35480;35559;651794	gene regulatory interaction	PID;Spike	11114293;11231316;11555647;12424255;12760745;14603527;16391002;17152050;19561194;19995753;20837772;9989795
4176580	AP-1_I.complex	protein		transcription factor	237384	IL6	gene	ensembl:ENSG00000136244;ensembl:ENSP00000258743;entrez-gene:3569;hgnc-id:6018;hgnc-symbol:IL6;hprd:00970;intact:EBI-11316349;refseq:NM_000600;refseq:NP_000591;refseq:XM_005249745;refseq:XP_011513692;uniprot:P05231	transcribed gene	651900	gene regulatory interaction	Spike	10405202;11028561;12626566;12727841;19251936
4176580	AP-1_I.complex	protein		transcription factor	65539	IL1B	protein	dip:DIP-474N;ensembl:ENSG00000125538;ensembl:ENSP00000263341;ensembl:ENST00000263341;entrez-gene:3553;hgnc-id:5992;hgnc-symbol:IL1B;hprd:00985;intact:EBI-10051097;intact:EBI-1026290;pdb:1HIB;pdb:1I1B;pdb:1IOB;pdb:1ITB;pdb:1L2H;pdb:1S0L;pdb:1T4Q;pdb:1TOO;pdb:1TP0;pdb:1TWE;pdb:1TWM;pdb:21BI;pdb:2I1B;pdb:2KH2;pdb:2NVH;pdb:31BI;pdb:3LTQ;pdb:3O4O;pdb:3POK;pdb:41BI;pdb:4DEP;pdb:4G6J;pdb:4G6M;pdb:4GAF;p…	product	652080	gene regulatory interaction	Spike	8386622
4114774	CSF2RB	gene	entrez-gene:1439	transcribed gene	74575	CSF2RB	protein	dip:DIP-127N;ensembl:ENSG00000100368;ensembl:ENSP00000384053;ensembl:ENSP00000385271;ensembl:ENST00000403662;ensembl:ENST00000406230;entrez-gene:1439;hgnc-id:2436;hgnc-symbol:CSF2RB;hprd:00739;intact:EBI-1809771;pdb:1C8P;pdb:1EGJ;pdb:1GH7;pdb:2GYS;pdb:2NA8;pdb:2NA9;pdb:4NKQ;pdb:5DWU;reactome:R-HSA-512988;reactome:R-HSA-5673001;reactome:R-HSA-5683826;reactome:R-HSA-5688849;reactome:R-HSA-5688863;r…	product	637078;641762;651068	gene regulatory interaction	BIND;Spike	12808131;9808557
232364	PTGS2	gene	ensembl:ENSG00000073756;ensembl:ENSP00000356438;entrez-gene:5743;hgnc-id:9605;hgnc-symbol:PTGS2;hprd:02599;intact:EBI-5590670;refseq:NM_000963;refseq:NP_000954;uniprot:P35354	transcribed gene	4213	PTGS2	protein	chembl:230;dip:DIP-28131N;ensembl:ENSG00000073756;ensembl:ENSP00000356438;ensembl:ENST00000367468;entrez-gene:5743;hgnc-id:9605;hgnc-symbol:PTGS2;hprd:02599;humancyc:HS01115-MONOMER;intact:EBI-21293019;intact:EBI-21293046;intact:EBI-5590949;intact:EBI-6662113;kegg:hsa:5743;pdb:1V0X;pdb:5F19;pdb:5F1A;pdb:5IKQ;pdb:5IKR;pdb:5IKT;pdb:5IKV;pdb:5KIR;reactome:R-HSA-197264;reactome:R-HSA-2142770;reactome…	product	35489;36452;36954;37177;650652;650814;651021;651297;651464;651599;651674;651676;651763;651858;651964;652066;652369	gene regulatory interaction	PID;Spike	10766162;10816557;11292836;11356833;12068008;12529332;12796504;12860389;15867358;17138645;17360647;18309368;18319725;19861462;21084670;9414121;9582321
238097	SMAD3/SMAD4/SP1	complex		transcription factor	13423	CDKN1A	protein	dip:DIP-246N;ensembl:ENSG00000124762;ensembl:ENSP00000244741;ensembl:ENSP00000362815;ensembl:ENSP00000384849;ensembl:ENSP00000409259;ensembl:ENSP00000482768;ensembl:ENST00000244741;ensembl:ENST00000373711;ensembl:ENST00000405375;ensembl:ENST00000448526;ensembl:ENST00000615513;entrez-gene:1026;hgnc-id:1784;hgnc-symbol:CDKN1A;hprd:00298;intact:EBI-1550784;intact:EBI-1800051;intact:EBI-21019594;inta…	product	36412	gene regulatory interaction	PID	10878024;9618481
17735	CEBPB	protein	dip:DIP-35345N;ensembl:ENSG00000172216;ensembl:ENSP00000305422;ensembl:ENST00000303004;entrez-gene:1051;hgnc-id:1834;hgnc-symbol:CEBPB;hprd:01801;intact:EBI-969696;pdb:1GTW;pdb:1GU4;pdb:1GU5;pdb:1H88;pdb:1H89;pdb:1H8A;pdb:1HJB;pdb:1IO4;pdb:2E42;pdb:2E43;pdb:6MG1;pdb:6MG2;pdb:6MG3;reactome:R-HSA-2559582;reactome:R-HSA-380994;reactome:R-HSA-381340;reactome:R-HSA-381378;reactome:R-HSA-3857339;reacto…	transcription factor	249771	CEBPB	gene	ensembl:ENSP00000305422;entrez-gene:1051;hgnc-id:1834;hprd:01801;refseq:NC_000020;refseq:NM_001285878;refseq:NM_001285879;refseq:NM_005194;refseq:NP_001272807;refseq:NP_001272808;refseq:NP_005185;uniprot:P17676	transcribed gene	35332	gene regulatory interaction	PID	10542314
15482	SPI1 Gene	protein	dip:DIP-953N;ensembl:ENSG00000066336;ensembl:ENSP00000227163;ensembl:ENSP00000367799;ensembl:ENST00000227163;ensembl:ENST00000378538;entrez-gene:6688;hgnc-id:11241;hgnc-symbol:SPI1;hprd:01305;intact:EBI-2293548;reactome:R-HSA-8865489;reactome:R-HSA-8865503;reactome:R-HSA-8939236;reactome:R-HSA-9616222;refseq:NC_000011;refseq:NM_001080547;refseq:NM_003120;refseq:NP_001074016;refseq:NP_003111;unipr…	transcription factor	74575	CSF2RB	protein	dip:DIP-127N;ensembl:ENSG00000100368;ensembl:ENSP00000384053;ensembl:ENSP00000385271;ensembl:ENST00000403662;ensembl:ENST00000406230;entrez-gene:1439;hgnc-id:2436;hgnc-symbol:CSF2RB;hprd:00739;intact:EBI-1809771;pdb:1C8P;pdb:1EGJ;pdb:1GH7;pdb:2GYS;pdb:2NA8;pdb:2NA9;pdb:4NKQ;pdb:5DWU;reactome:R-HSA-512988;reactome:R-HSA-5673001;reactome:R-HSA-5683826;reactome:R-HSA-5688849;reactome:R-HSA-5688863;r…	product	651068	gene regulatory interaction	Spike	9808557
32341	APP	protein	chembl:2487;dip:DIP-574N;ensembl:ENSG00000142192;ensembl:ENSP00000284981;ensembl:ENSP00000345463;ensembl:ENSP00000346129;ensembl:ENSP00000350578;ensembl:ENSP00000351796;ensembl:ENSP00000352760;ensembl:ENSP00000387483;ensembl:ENST00000346798;ensembl:ENST00000348990;ensembl:ENST00000354192;ensembl:ENST00000357903;ensembl:ENST00000358918;ensembl:ENST00000440126;entrez-gene:351;hgnc-id:620;hgnc-symbo…	transcription factor	431775	OAS2	gene	ensembl:ENSG00000111335;entrez-gene:4939;hgnc-symbol:OAS2	transcribed gene	59070	gene regulatory interaction	InnateDB	21832049
233423	TAp63g (tetramer)/SSRP1	complex		transcription factor	235740	MDM2	gene	ensembl:ENSG00000135679;ensembl:ENSP00000348637;ensembl:ENSP00000417281;entrez-gene:4193;hgnc-id:6973;hprd:01272;intact:EBI-1550787;refseq:NC_000012;refseq:NM_001145337;refseq:NM_001145339;refseq:NM_001145340;refseq:NM_001278462;refseq:NM_002392;refseq:XM_005268872;refseq:XM_006719399;refseq:XM_006719400;refseq:XP_005268929;uniprot:Q00987	transcribed gene	35971	gene regulatory interaction	PID	12374749
4176476	NFkB.complex	protein		transcription factor	65541	IL18	protein	dip:DIP-3785N;ensembl:ENSG00000150782;ensembl:ENSP00000280357;ensembl:ENSP00000434161;ensembl:ENSP00000434561;ensembl:ENST00000280357;ensembl:ENST00000524595;ensembl:ENST00000528832;entrez-gene:3606;hgnc-id:5986;hgnc-symbol:IL18;hprd:02976;intact:EBI-11016725;intact:EBI-3910835;pdb:1J0S;pdb:2VXT;pdb:3F62;pdb:3WO2;pdb:3WO3;pdb:3WO4;pdb:4EEE;pdb:4EKX;pdb:4HJJ;pdb:4R6U;pdb:4XFS;pdb:4XFT;pdb:4XFU;rea…	product	650722	gene regulatory interaction	Spike	11377701;12684057
249771	CEBPB	gene	ensembl:ENSP00000305422;entrez-gene:1051;hgnc-id:1834;hprd:01801;refseq:NC_000020;refseq:NM_001285878;refseq:NM_001285879;refseq:NM_005194;refseq:NP_001272807;refseq:NP_001272808;refseq:NP_005185;uniprot:P17676	transcribed gene	17735	CEBPB	protein	dip:DIP-35345N;ensembl:ENSG00000172216;ensembl:ENSP00000305422;ensembl:ENST00000303004;entrez-gene:1051;hgnc-id:1834;hgnc-symbol:CEBPB;hprd:01801;intact:EBI-969696;pdb:1GTW;pdb:1GU4;pdb:1GU5;pdb:1H88;pdb:1H89;pdb:1H8A;pdb:1HJB;pdb:1IO4;pdb:2E42;pdb:2E43;pdb:6MG1;pdb:6MG2;pdb:6MG3;reactome:R-HSA-2559582;reactome:R-HSA-380994;reactome:R-HSA-381340;reactome:R-HSA-381378;reactome:R-HSA-3857339;reacto…	product	35332;637747;642165;652325	gene regulatory interaction	BIND;PID;Spike	10542314;12215258;14988562;15546613
54049	CCR1	protein	chembl:2413;dip:DIP-5832N;ensembl:ENSG00000163823;ensembl:ENSP00000296140;ensembl:ENST00000296140;entrez-gene:1230;hgnc-id:1602;hgnc-symbol:CCR1;hprd:03101;intact:EBI-608322;pdb:1Y5D;reactome:R-HSA-373107;reactome:R-HSA-380108;reactome:R-HSA-418594;reactome:R-HSA-6783783;refseq:NM_001295;refseq:NP_001286;uniprot:CCR1_HUMAN;uniprot:P32246;uniprot:Q5U003;uniprot:Q86VA9	transcription factor	435080	CCL7	gene	ensembl:ENSG00000108688;ensembl:ENSP00000367832;entrez-gene:6354;hgnc-id:10634;hgnc-symbol:CCL7;hprd:01150;intact:EBI-26478626;refseq:NM_006273;refseq:NP_006264;uniprot:P80098	transcribed gene	58235	gene regulatory interaction	InnateDB	12381680;7545673;8530354
11985	HDAC4	protein	chembl:3524;dip:DIP-34565N;ensembl:ENSG00000068024;ensembl:ENSP00000264606;ensembl:ENST00000345617;entrez-gene:9759;hgnc-id:14063;hgnc-symbol:HDAC4;hprd:05610;humancyc:HS00927-MONOMER;intact:EBI-308629;pdb:2H8N;pdb:2O94;pdb:2VQJ;pdb:2VQM;pdb:2VQO;pdb:2VQQ;pdb:2VQV;pdb:2VQW;pdb:3UXG;pdb:3UZD;pdb:3V31;pdb:4CBT;pdb:4CBY;pdb:5A2S;pdb:5ZOO;pdb:5ZOP;pdb:6FYZ;reactome:R-HSA-2122947;reactome:R-HSA-264460…	transcription factor	232364	PTGS2	gene	ensembl:ENSG00000073756;ensembl:ENSP00000356438;entrez-gene:5743;hgnc-id:9605;hgnc-symbol:PTGS2;hprd:02599;intact:EBI-5590670;refseq:NM_000963;refseq:NP_000954;uniprot:P35354	transcribed gene	52801;55427;58729	gene regulatory interaction	InnateDB;IntAct	18820298
4176476	NFkB.complex	protein		transcription factor	232364	PTGS2	gene	ensembl:ENSG00000073756;ensembl:ENSP00000356438;entrez-gene:5743;hgnc-id:9605;hgnc-symbol:PTGS2;hprd:02599;intact:EBI-5590670;refseq:NM_000963;refseq:NP_000954;uniprot:P35354	transcribed gene	651676	gene regulatory interaction	Spike	12529332;12860389;9414121
15482	SPI1 Gene	protein	dip:DIP-953N;ensembl:ENSG00000066336;ensembl:ENSP00000227163;ensembl:ENSP00000367799;ensembl:ENST00000227163;ensembl:ENST00000378538;entrez-gene:6688;hgnc-id:11241;hgnc-symbol:SPI1;hprd:01305;intact:EBI-2293548;reactome:R-HSA-8865489;reactome:R-HSA-8865503;reactome:R-HSA-8939236;reactome:R-HSA-9616222;refseq:NC_000011;refseq:NM_001080547;refseq:NM_003120;refseq:NP_001074016;refseq:NP_003111;unipr…	transcription factor	4304438	LY96	gene	entrez-gene:23643	transcribed gene	651878	gene regulatory interaction	Spike	19632992
15482	SPI1 Gene	protein	dip:DIP-953N;ensembl:ENSG00000066336;ensembl:ENSP00000227163;ensembl:ENSP00000367799;ensembl:ENST00000227163;ensembl:ENST00000378538;entrez-gene:6688;hgnc-id:11241;hgnc-symbol:SPI1;hprd:01305;intact:EBI-2293548;reactome:R-HSA-8865489;reactome:R-HSA-8865503;reactome:R-HSA-8939236;reactome:R-HSA-9616222;refseq:NC_000011;refseq:NM_001080547;refseq:NM_003120;refseq:NP_001074016;refseq:NP_003111;unipr…	transcription factor	245034	LYZ	gene	ensembl:ENSG00000090382;entrez-gene:4069;hgnc-symbol:LYZ;uniprot:P61626	transcribed gene	35317	gene regulatory interaction	PID	17959653
4176476	NFkB.complex	protein		transcription factor	236686	MMP9	gene	ensembl:ENSG00000100985;entrez-gene:4318;intact:EBI-2677274;uniprot:P14780	transcribed gene	651861	gene regulatory interaction	Spike	15169910
4176476	NFkB.complex	protein		transcription factor	443616	CXCL2	gene	ensembl:ENSG00000081041;entrez-gene:2920;hgnc-symbol:CXCL2;intact:EBI-10050550;refseq:NP_002080	transcribed gene	651895	gene regulatory interaction	Spike	8576166
232859	STAT1-3 (dimer)	group		transcription factor	23275	TNF	protein	chembl:1825;dip:DIP-2895N;ensembl:ENSG00000204490;ensembl:ENSG00000206439;ensembl:ENSG00000223952;ensembl:ENSG00000228321;ensembl:ENSG00000228849;ensembl:ENSG00000230108;ensembl:ENSG00000232810;ensembl:ENSP00000365290;ensembl:ENSP00000372988;ensembl:ENSP00000389490;ensembl:ENSP00000389492;ensembl:ENSP00000392858;ensembl:ENSP00000398698;ensembl:ENSP00000410668;ensembl:ENST00000376122;ensembl:ENST0…	product	35947	gene regulatory interaction	PID	14764690
3445230	CSF2RA	gene	ensembl:ENSP00000347606;ensembl:ENSP00000348058;ensembl:ENSP00000370911;ensembl:ENSP00000370920;ensembl:ENSP00000370935;ensembl:ENSP00000370940;ensembl:ENSP00000394227;ensembl:ENSP00000416437;ensembl:ENSP00000440491;entrez-gene:1438;hgnc-id:2435;hprd:02381;refseq:NM_001161529;refseq:NM_001161530;refseq:NM_001161531;refseq:NM_001161532;refseq:NM_006140;refseq:NM_172245;refseq:NM_172246;refseq:NM_1…	transcribed gene	74588	CSF2RA	protein	dip:DIP-635N;ensembl:ENSG00000198223;ensembl:ENSP00000347606;ensembl:ENSP00000348058;ensembl:ENSP00000370911;ensembl:ENSP00000370920;ensembl:ENSP00000370935;ensembl:ENSP00000370940;ensembl:ENSP00000394227;ensembl:ENSP00000416437;ensembl:ENSP00000440491;ensembl:ENST00000355432;ensembl:ENST00000355805;ensembl:ENST00000381500;ensembl:ENST00000381509;ensembl:ENST00000381524;ensembl:ENST00000381529;en…	product	651014;651069;651946	gene regulatory interaction	Spike	15676205;7565736
4176476	NFkB.complex	protein		transcription factor	250359	IL18	gene	ensembl:ENSG00000150782;ensembl:ENSP00000280357;ensembl:ENSP00000434561;entrez-gene:3606;hgnc-id:5986;hprd:02976;intact:EBI-26483990;refseq:NM_001243211;refseq:NM_001562;refseq:NP_001230140;refseq:NP_001553;refseq:XM_011542805;refseq:XM_011542806;refseq:XP_011541107;refseq:XP_011541108;uniprot:Q14116	transcribed gene	650722	gene regulatory interaction	Spike	11377701;12684057
4176476	NFkB.complex	protein		transcription factor	51150	MMP9	protein	chembl:321;dip:DIP-29518N;ensembl:ENSG00000100985;ensembl:ENSP00000361405;ensembl:ENST00000372330;entrez-gene:4318;hgnc-id:7176;hgnc-symbol:MMP9;hprd:00387;humancyc:HS02175-MONOMER;intact:EBI-1382326;pdb:1GKC;pdb:1GKD;pdb:1ITV;pdb:1L6J;pdb:1LKG;pdb:2OVX;pdb:2OVZ;pdb:2OW0;pdb:2OW1;pdb:2OW2;pdb:4H1Q;pdb:4H2E;pdb:4H3X;pdb:4H82;pdb:4HMA;pdb:4JIJ;pdb:4JQG;pdb:4WZV;pdb:4XCT;pdb:5CUH;pdb:5I12;pdb:5TH6;p…	product	651861	gene regulatory interaction	Spike	15169910
4176580	AP-1_I.complex	protein		transcription factor	232364	PTGS2	gene	ensembl:ENSG00000073756;ensembl:ENSP00000356438;entrez-gene:5743;hgnc-id:9605;hgnc-symbol:PTGS2;hprd:02599;intact:EBI-5590670;refseq:NM_000963;refseq:NP_000954;uniprot:P35354	transcribed gene	652369	gene regulatory interaction	Spike	11292836;12068008
51166	MMP12	protein	chembl:4393;ensembl:ENSG00000110347;ensembl:ENSG00000262406;ensembl:ENSP00000458585;ensembl:ENST00000571244;entrez-gene:4321;hgnc-id:7158;hgnc-symbol:MMP12;hprd:03027;humancyc:HS03303-MONOMER;intact:EBI-7881912;intact:MINT-7709562;pdb:1JIZ;pdb:1JK3;pdb:1OS2;pdb:1OS9;pdb:1RMZ;pdb:1ROS;pdb:1UTT;pdb:1UTZ;pdb:1Y93;pdb:1YCM;pdb:1Z3J;pdb:2HU6;pdb:2JXY;pdb:2K2G;pdb:2K9C;pdb:2KRJ;pdb:2MLR;pdb:2MLS;pdb:2N…	transcription factor	438795	CCL13	gene	ensembl:ENSG00000181374;entrez-gene:6357;hgnc-symbol:CCL13;intact:EBI-26475337	transcribed gene	54195	gene regulatory interaction	InnateDB	18660381
4176580	AP-1_I.complex	protein		transcription factor	51150	MMP9	protein	chembl:321;dip:DIP-29518N;ensembl:ENSG00000100985;ensembl:ENSP00000361405;ensembl:ENST00000372330;entrez-gene:4318;hgnc-id:7176;hgnc-symbol:MMP9;hprd:00387;humancyc:HS02175-MONOMER;intact:EBI-1382326;pdb:1GKC;pdb:1GKD;pdb:1ITV;pdb:1L6J;pdb:1LKG;pdb:2OVX;pdb:2OVZ;pdb:2OW0;pdb:2OW1;pdb:2OW2;pdb:4H1Q;pdb:4H2E;pdb:4H3X;pdb:4H82;pdb:4HMA;pdb:4JIJ;pdb:4JQG;pdb:4WZV;pdb:4XCT;pdb:5CUH;pdb:5I12;pdb:5TH6;p…	product	652230	gene regulatory interaction	Spike	15608675;19208844;4565943
4176580	AP-1_I.complex	protein		transcription factor	65541	IL18	protein	dip:DIP-3785N;ensembl:ENSG00000150782;ensembl:ENSP00000280357;ensembl:ENSP00000434161;ensembl:ENSP00000434561;ensembl:ENST00000280357;ensembl:ENST00000524595;ensembl:ENST00000528832;entrez-gene:3606;hgnc-id:5986;hgnc-symbol:IL18;hprd:02976;intact:EBI-11016725;intact:EBI-3910835;pdb:1J0S;pdb:2VXT;pdb:3F62;pdb:3WO2;pdb:3WO3;pdb:3WO4;pdb:4EEE;pdb:4EKX;pdb:4HJJ;pdb:4R6U;pdb:4XFS;pdb:4XFT;pdb:4XFU;rea…	product	650851	gene regulatory interaction	Spike	10975835
19009	KLF4	protein	dip:DIP-57667N;ensembl:ENSG00000136826;ensembl:ENSP00000363804;ensembl:ENST00000374672;ensembl:ENST00000374672.4;entrez-gene:9314;hgnc-id:6348;hgnc-symbol:KLF4;hprd:03769;intact:EBI-20740118;intact:EBI-7232405;intact:MINT-7261942;reactome:R-HSA-381340;reactome:R-HSA-422085;reactome:R-HSA-434463;reactome:R-HSA-452723;reactome:R-HSA-5660404;reactome:R-HSA-9617828;refseq:NM_001314052;refseq:NM_00423…	transcription factor	430833	TJP1	gene	ensembl:ENSG00000104067;ensembl:ENSP00000281537;ensembl:ENSP00000348416;ensembl:ENSP00000382890;ensembl:ENSP00000483470;entrez-gene:7082;hgnc-id:11827;hgnc-symbol:TJP1;hprd:03002;refseq:NM_001301025;refseq:NM_001301026;refseq:NM_001330239;refseq:NM_003257;refseq:NM_175610;refseq:XM_005254617;refseq:XM_005254618;refseq:XM_005254619;refseq:XM_005254620;refseq:XM_005254621;refseq:XM_006720660;refseq…	product	53124	gene regulatory interaction	InnateDB	24318462
32341	APP	protein	chembl:2487;dip:DIP-574N;ensembl:ENSG00000142192;ensembl:ENSP00000284981;ensembl:ENSP00000345463;ensembl:ENSP00000346129;ensembl:ENSP00000350578;ensembl:ENSP00000351796;ensembl:ENSP00000352760;ensembl:ENSP00000387483;ensembl:ENST00000346798;ensembl:ENST00000348990;ensembl:ENST00000354192;ensembl:ENST00000357903;ensembl:ENST00000358918;ensembl:ENST00000440126;entrez-gene:351;hgnc-id:620;hgnc-symbo…	transcription factor	233428	CDKN1A	gene	ensembl:ENSG00000124762;ensembl:ENSP00000244741;ensembl:ENSP00000384849;ensembl:ENSP00000409259;ensembl:ENSP00000482768;entrez-gene:1026;hgnc-id:1784;hgnc-symbol:CDKN1A;hprd:00298;intact:EBI-1550784;refseq:NC_000006;refseq:NM_000389;refseq:NM_001220777;refseq:NM_001220778;refseq:NM_001291549;refseq:NM_078467;refseq:NP_000380;refseq:NP_001207706;refseq:NP_001207707;refseq:NP_001278478;refseq:NP_00…	transcribed gene	53982	gene regulatory interaction	InnateDB	21832049
241450	IL10	gene	ensembl:ENSG00000136634;ensembl:ENSP00000412237;entrez-gene:3586;hgnc-id:5962;hprd:00495;intact:EBI-9975278;refseq:NM_000572;refseq:NP_000563;uniprot:P22301	transcribed gene	55165	IL10	protein	dip:DIP-3511N;ensembl:ENSG00000136634;ensembl:ENSP00000412237;ensembl:ENST00000423557;entrez-gene:3586;hgnc-id:5962;hgnc-symbol:IL10;hprd:00495;intact:EBI-1031632;pdb:1ILK;pdb:1INR;pdb:1J7V;pdb:1LK3;pdb:1Y6K;pdb:2H24;pdb:2ILK;reactome:R-HSA-447125;reactome:R-HSA-6783783;reactome:R-HSA-6785807;reactome:R-HSA-6790020;reactome:R-HSA-8950505;reactome:R-HSA-9662834;reactome:R-HSA-9664323;refseq:NM_000…	product	35678;36235;36650;650716;651037;651101;651571;651634;651638;651822;651910;651952;652104	gene regulatory interaction	PID;Spike	11790301;12649301;15699140;15749884;18093541;18843277;20154735;21084670;8602263;8602264;8704212
4300408	TLR2	gene	entrez-gene:7097	transcribed gene	72310	TLR2	protein	chembl:4163;dip:DIP-35138N;ensembl:ENSG00000137462;ensembl:ENSP00000260010;ensembl:ENSP00000494425;ensembl:ENSP00000495339;ensembl:ENST00000260010;ensembl:ENST00000642580;ensembl:ENST00000642700;entrez-gene:7097;hgnc-id:11848;hgnc-symbol:TLR2;hprd:04323;intact:EBI-973722;pdb:1FYW;pdb:1FYX;pdb:1O77;pdb:2Z7X;pdb:2Z80;pdb:6NIG;reactome:R-HSA-1236974;reactome:R-HSA-1461957;reactome:R-HSA-166058;react…	product	650957	gene regulatory interaction	Spike	11254708
3005097	CYBB	gene	ensembl:ENSP00000367851;entrez-gene:1536;hgnc-id:2578;hprd:02382;refseq:NM_000397;refseq:NP_000388;uniprot:P04839	transcribed gene	52782	CYBB	protein	dip:DIP-42005N;ensembl:ENSG00000165168;ensembl:ENSP00000367851;ensembl:ENST00000378588;entrez-gene:1536;hgnc-id:2578;hgnc-symbol:CYBB;hprd:02382;humancyc:HS09192-MONOMER;intact:EBI-6253630;pdb:3A1F;reactome:R-HSA-1222445;reactome:R-HSA-1222556;reactome:R-HSA-1236973;reactome:R-HSA-3299685;reactome:R-HSA-4420097;reactome:R-HSA-5218720;reactome:R-HSA-5668599;reactome:R-HSA-6798695;reactome:R-HSA-67…	product	651713	gene regulatory interaction	Spike	10233904
237384	IL6	gene	ensembl:ENSG00000136244;ensembl:ENSP00000258743;entrez-gene:3569;hgnc-id:6018;hgnc-symbol:IL6;hprd:00970;intact:EBI-11316349;refseq:NM_000600;refseq:NP_000591;refseq:XM_005249745;refseq:XP_011513692;uniprot:P05231	transcribed gene	17724	IL6	protein	dip:DIP-482N;ensembl:ENSG00000136244;ensembl:ENSP00000258743;ensembl:ENSP00000385675;ensembl:ENST00000258743;ensembl:ENST00000404625;entrez-gene:3569;hgnc-id:6018;hgnc-symbol:IL6;hprd:00970;intact:EBI-720533;pdb:1ALU;pdb:1IL6;pdb:1N2Q;pdb:1P9M;pdb:2IL6;pdb:4CNI;pdb:4J4L;pdb:4NI7;pdb:4NI9;pdb:4O9H;pdb:4ZS7;pdb:5FUC;reactome:R-HSA-1059683;reactome:R-HSA-110056;reactome:R-HSA-112411;reactome:R-HSA-2…	product	34162;34925;35641;35679;35853;36725;38778;38924;39085;650935;650990;651900	gene regulatory interaction	BioCarta;PID;Spike	10037779;10405202;10501190;11028561;12626566;12727841;15657292;1644898;19251936;19687301;19918056;19966854;20386569;21084670;2183031;8290595
436787	CSF1	gene	ensembl:ENSG00000184371;ensembl:ENSP00000327513;ensembl:ENSP00000358817;entrez-gene:1435;hgnc-id:2432;hgnc-symbol:CSF1;hprd:00388;intact:EBI-26478827;refseq:NC_000001;refseq:NM_000757;refseq:NM_172210;refseq:NM_172211;refseq:NM_172212;refseq:NP_000748;refseq:NP_757349;refseq:NP_757350;refseq:NP_757351;uniprot:P09603	transcribed gene	95186	CSF1	protein	dip:DIP-41860N;ensembl:ENSG00000184371;ensembl:ENSP00000327513;ensembl:ENSP00000358816;ensembl:ENSP00000358817;ensembl:ENSP00000407317;ensembl:ENST00000329608;ensembl:ENST00000369801;ensembl:ENST00000369802;ensembl:ENST00000420111;entrez-gene:1435;hgnc-id:2432;hgnc-symbol:CSF1;hprd:00388;intact:EBI-2872294;pdb:1HMC;pdb:3UEZ;pdb:3UF2;pdb:4ADF;pdb:4FA8;pdb:4WRL;pdb:4WRM;pdb:5LXF;reactome:R-HSA-3814…	product	632425;641787;650929	gene regulatory interaction	BIND;Spike	15676205;15780937;15988478
14013	MDM2	protein	chembl:5023;dip:DIP-392N;ensembl:ENSG00000135679;ensembl:ENSP00000348637;ensembl:ENSP00000417281;entrez-gene:4193;hgnc-id:6973;hgnc-symbol:MDM2;hprd:01272;intact:EBI-2694074;intact:EBI-389668;intact:EBI-5279149;pdb:1RV1;reactome:R-HSA-198638;reactome:R-HSA-198644;reactome:R-HSA-3000408;reactome:R-HSA-3700996;reactome:R-HSA-416843;reactome:R-HSA-416849;reactome:R-HSA-6782472;reactome:R-HSA-6792862…	transcription factor	13423	CDKN1A	protein	dip:DIP-246N;ensembl:ENSG00000124762;ensembl:ENSP00000244741;ensembl:ENSP00000362815;ensembl:ENSP00000384849;ensembl:ENSP00000409259;ensembl:ENSP00000482768;ensembl:ENST00000244741;ensembl:ENST00000373711;ensembl:ENST00000405375;ensembl:ENST00000448526;ensembl:ENST00000615513;entrez-gene:1026;hgnc-id:1784;hgnc-symbol:CDKN1A;hprd:00298;intact:EBI-1550784;intact:EBI-1800051;intact:EBI-21019594;inta…	product	632266	gene regulatory interaction	BIND	15546622
17735	CEBPB	protein	dip:DIP-35345N;ensembl:ENSG00000172216;ensembl:ENSP00000305422;ensembl:ENST00000303004;entrez-gene:1051;hgnc-id:1834;hgnc-symbol:CEBPB;hprd:01801;intact:EBI-969696;pdb:1GTW;pdb:1GU4;pdb:1GU5;pdb:1H88;pdb:1H89;pdb:1H8A;pdb:1HJB;pdb:1IO4;pdb:2E42;pdb:2E43;pdb:6MG1;pdb:6MG2;pdb:6MG3;reactome:R-HSA-2559582;reactome:R-HSA-380994;reactome:R-HSA-381340;reactome:R-HSA-381378;reactome:R-HSA-3857339;reacto…	transcription factor	232364	PTGS2	gene	ensembl:ENSG00000073756;ensembl:ENSP00000356438;entrez-gene:5743;hgnc-id:9605;hgnc-symbol:PTGS2;hprd:02599;intact:EBI-5590670;refseq:NM_000963;refseq:NP_000954;uniprot:P35354	transcribed gene	52439;57896;58729	gene regulatory interaction	InnateDB;IntAct	18820298
4176476	NFkB.complex	protein		transcription factor	4300408	TLR2	gene	entrez-gene:7097	transcribed gene	650957	gene regulatory interaction	Spike	11254708
15482	SPI1 Gene	protein	dip:DIP-953N;ensembl:ENSG00000066336;ensembl:ENSP00000227163;ensembl:ENSP00000367799;ensembl:ENST00000227163;ensembl:ENST00000378538;entrez-gene:6688;hgnc-id:11241;hgnc-symbol:SPI1;hprd:01305;intact:EBI-2293548;reactome:R-HSA-8865489;reactome:R-HSA-8865503;reactome:R-HSA-8939236;reactome:R-HSA-9616222;refseq:NC_000011;refseq:NM_001080547;refseq:NM_003120;refseq:NP_001074016;refseq:NP_003111;unipr…	transcription factor	74588	CSF2RA	protein	dip:DIP-635N;ensembl:ENSG00000198223;ensembl:ENSP00000347606;ensembl:ENSP00000348058;ensembl:ENSP00000370911;ensembl:ENSP00000370920;ensembl:ENSP00000370935;ensembl:ENSP00000370940;ensembl:ENSP00000394227;ensembl:ENSP00000416437;ensembl:ENSP00000440491;ensembl:ENST00000355432;ensembl:ENST00000355805;ensembl:ENST00000381500;ensembl:ENST00000381509;ensembl:ENST00000381524;ensembl:ENST00000381529;en…	product	651069	gene regulatory interaction	Spike	7565736
4176580	AP-1_I.complex	protein		transcription factor	23275	TNF	protein	chembl:1825;dip:DIP-2895N;ensembl:ENSG00000204490;ensembl:ENSG00000206439;ensembl:ENSG00000223952;ensembl:ENSG00000228321;ensembl:ENSG00000228849;ensembl:ENSG00000230108;ensembl:ENSG00000232810;ensembl:ENSP00000365290;ensembl:ENSP00000372988;ensembl:ENSP00000389490;ensembl:ENSP00000389492;ensembl:ENSP00000392858;ensembl:ENSP00000398698;ensembl:ENSP00000410668;ensembl:ENST00000376122;ensembl:ENST0…	product	651085	gene regulatory interaction	Spike	10954918;11991968
235740	MDM2	gene	ensembl:ENSG00000135679;ensembl:ENSP00000348637;ensembl:ENSP00000417281;entrez-gene:4193;hgnc-id:6973;hprd:01272;intact:EBI-1550787;refseq:NC_000012;refseq:NM_001145337;refseq:NM_001145339;refseq:NM_001145340;refseq:NM_001278462;refseq:NM_002392;refseq:XM_005268872;refseq:XM_006719399;refseq:XM_006719400;refseq:XP_005268929;uniprot:Q00987	transcribed gene	14013	MDM2	protein	chembl:5023;dip:DIP-392N;ensembl:ENSG00000135679;ensembl:ENSP00000348637;ensembl:ENSP00000417281;entrez-gene:4193;hgnc-id:6973;hgnc-symbol:MDM2;hprd:01272;intact:EBI-2694074;intact:EBI-389668;intact:EBI-5279149;pdb:1RV1;reactome:R-HSA-198638;reactome:R-HSA-198644;reactome:R-HSA-3000408;reactome:R-HSA-3700996;reactome:R-HSA-416843;reactome:R-HSA-416849;reactome:R-HSA-6782472;reactome:R-HSA-6792862…	product	33113;35224;35971;37072;39010;173381;640418;641585;650666;651194;652160	gene regulatory interaction	BIND;BioCarta;IntAct;PID;Spike	10435630;12138177;12374749;14988562;15525514;15545268;15550242;15735750;16009130;16360036;17226766;17409421;17719542;18037962;20228809;21459846;7651818;8319905
4176476	NFkB.complex	protein		transcription factor	241450	IL10	gene	ensembl:ENSG00000136634;ensembl:ENSP00000412237;entrez-gene:3586;hgnc-id:5962;hprd:00495;intact:EBI-9975278;refseq:NM_000572;refseq:NP_000563;uniprot:P22301	transcribed gene	650716	gene regulatory interaction	Spike	8704212
4176476	NFkB.complex	protein		transcription factor	233241	FAS	gene	ensembl:ENSP00000347979;ensembl:ENSP00000477997;entrez-gene:355;hgnc-id:11920;hprd:00609;refseq:NC_000010;refseq:NM_000043;refseq:NM_152871;refseq:NM_152872;refseq:XM_006717819;refseq:XM_011539764;refseq:XM_011539765;refseq:XM_011539766;refseq:XM_011539767;refseq:XP_011538069;uniprot:P25445	transcribed gene	651247	gene regulatory interaction	Spike	12761580
4176476	NFkB.complex	protein		transcription factor	142972	DUSP1	protein	ensembl:ENSG00000120129;ensembl:ENSP00000239223;ensembl:ENST00000239223;entrez-gene:1843;hgnc-id:3064;hgnc-symbol:DUSP1;hprd:02835;humancyc:HS04371-MONOMER;intact:EBI-975493;pdb:6APX;pdb:6D65;pdb:6D66;pdb:6D67;reactome:R-HSA-112409;reactome:R-HSA-203796;reactome:R-HSA-5675221;refseq:NC_000005;refseq:NM_004417;refseq:NP_004408;unigene:171695;uniprot:B4DU40;uniprot:D3DQL9;uniprot:DUS1_HUMAN;uniprot…	product	651058	gene regulatory interaction	Spike	18508759
238097	SMAD3/SMAD4/SP1	complex		transcription factor	70793	COL1A2	protein	dip:DIP-36079N;ensembl:ENSG00000164692;ensembl:ENSP00000297268;ensembl:ENST00000297268;entrez-gene:1278;hgnc-id:2198;hprd:00363;intact:EBI-9095879;intact:EBI-923254;intact:EBI-983038;pdb:5CTD;pdb:5CTI;pdb:5CVA;pdb:6JEC;reactome:R-HSA-114604;reactome:R-HSA-141093;reactome:R-HSA-1442490;reactome:R-HSA-1474244;reactome:R-HSA-1650814;reactome:R-HSA-1980213;reactome:R-HSA-198933;reactome:R-HSA-2022070…	product	33426	gene regulatory interaction	PID	11114293;11555647
4176476	NFkB.complex	protein		transcription factor	235844	DUSP1	gene	ensembl:ENSG00000120129;entrez-gene:1843;hgnc-id:3064;hgnc-symbol:DUSP1;intact:EBI-6081112;refseq:NC_000005;uniprot:P28562	transcribed gene	651058	gene regulatory interaction	Spike	18508759
4176580	AP-1_I.complex	protein		repressor	13423	CDKN1A	protein	dip:DIP-246N;ensembl:ENSG00000124762;ensembl:ENSP00000244741;ensembl:ENSP00000362815;ensembl:ENSP00000384849;ensembl:ENSP00000409259;ensembl:ENSP00000482768;ensembl:ENST00000244741;ensembl:ENST00000373711;ensembl:ENST00000405375;ensembl:ENST00000448526;ensembl:ENST00000615513;entrez-gene:1026;hgnc-id:1784;hgnc-symbol:CDKN1A;hprd:00298;intact:EBI-1550784;intact:EBI-1800051;intact:EBI-21019594;inta…	product	651686	gene regulatory interaction	Spike	11136975
443615	KLF6	protein	ensembl:ENSG00000067082;ensembl:ENSP00000419079;ensembl:ENSP00000419923;ensembl:ENSP00000445301;ensembl:ENST00000469435;ensembl:ENST00000497571;ensembl:ENST00000542957;entrez-gene:1316;hgnc-id:2235;hgnc-symbol:KLF6;hprd:03632;intact:EBI-714994;refseq:NC_000010;refseq:NM_001160124;refseq:NM_001160125;refseq:NM_001300;refseq:NP_001153596;refseq:NP_001153597;refseq:NP_001291;uniprot:B2RE86;uniprot:B…	transcription factor	443616	CXCL2	gene	ensembl:ENSG00000081041;entrez-gene:2920;hgnc-symbol:CXCL2;intact:EBI-10050550;refseq:NP_002080	transcribed gene	50891	gene regulatory interaction	InnateDB;IntAct	24634218
4176580	AP-1_I.complex	protein		transcription factor	236686	MMP9	gene	ensembl:ENSG00000100985;entrez-gene:4318;intact:EBI-2677274;uniprot:P14780	transcribed gene	652230	gene regulatory interaction	Spike	15608675;19208844;4565943
15482	SPI1 Gene	protein	dip:DIP-953N;ensembl:ENSG00000066336;ensembl:ENSP00000227163;ensembl:ENSP00000367799;ensembl:ENST00000227163;ensembl:ENST00000378538;entrez-gene:6688;hgnc-id:11241;hgnc-symbol:SPI1;hprd:01305;intact:EBI-2293548;reactome:R-HSA-8865489;reactome:R-HSA-8865503;reactome:R-HSA-8939236;reactome:R-HSA-9616222;refseq:NC_000011;refseq:NM_001080547;refseq:NM_003120;refseq:NP_001074016;refseq:NP_003111;unipr…	transcription factor	4306008	MSR1	gene	entrez-gene:4481	transcribed gene	652240	gene regulatory interaction	Spike	8007948
17735	CEBPB	protein	dip:DIP-35345N;ensembl:ENSG00000172216;ensembl:ENSP00000305422;ensembl:ENST00000303004;entrez-gene:1051;hgnc-id:1834;hgnc-symbol:CEBPB;hprd:01801;intact:EBI-969696;pdb:1GTW;pdb:1GU4;pdb:1GU5;pdb:1H88;pdb:1H89;pdb:1H8A;pdb:1HJB;pdb:1IO4;pdb:2E42;pdb:2E43;pdb:6MG1;pdb:6MG2;pdb:6MG3;reactome:R-HSA-2559582;reactome:R-HSA-380994;reactome:R-HSA-381340;reactome:R-HSA-381378;reactome:R-HSA-3857339;reacto…	transcription factor	235844	DUSP1	gene	ensembl:ENSG00000120129;entrez-gene:1843;hgnc-id:3064;hgnc-symbol:DUSP1;intact:EBI-6081112;refseq:NC_000005;uniprot:P28562	product	47679	gene regulatory interaction	InnateDB	18682532
4306008	MSR1	gene	entrez-gene:4481	transcribed gene	70774	MSR1	protein	ensembl:ENSG00000038945;ensembl:ENSP00000262100;ensembl:ENSP00000262101;ensembl:ENSP00000347430;ensembl:ENSP00000371428;ensembl:ENST00000262101;ensembl:ENST00000350896;ensembl:ENST00000355282;ensembl:ENST00000381998;entrez-gene:4481;hgnc-id:7376;hgnc-symbol:MSR1;hprd:01092;intact:EBI-1776976;reactome:R-HSA-2173717;reactome:R-HSA-2507846;reactome:R-HSA-3000480;refseq:NM_002445;refseq:NM_138715;ref…	product	652240	gene regulatory interaction	Spike	8007948
233241	FAS	gene	ensembl:ENSP00000347979;ensembl:ENSP00000477997;entrez-gene:355;hgnc-id:11920;hprd:00609;refseq:NC_000010;refseq:NM_000043;refseq:NM_152871;refseq:NM_152872;refseq:XM_006717819;refseq:XM_011539764;refseq:XM_011539765;refseq:XM_011539766;refseq:XM_011539767;refseq:XP_011538069;uniprot:P25445	transcribed gene	13018	FAS	protein	dip:DIP-924N;ensembl:ENSG00000026103;ensembl:ENSP00000347426;ensembl:ENSP00000347979;ensembl:ENSP00000349896;ensembl:ENSP00000420975;ensembl:ENSP00000422453;ensembl:ENSP00000423755;ensembl:ENSP00000424113;ensembl:ENSP00000425159;ensembl:ENSP00000477997;ensembl:ENSP00000498466;ensembl:ENST00000355279;ensembl:ENST00000357339;ensembl:ENST00000479522;ensembl:ENST00000484444;ensembl:ENST00000488877;en…	product	35412;35783;37074;38184;632165;632904;632906;632907;634181;634473;634858;636966;651118;651126;651247;651265;651332;651904	gene regulatory interaction	BIND;BioCarta;PID;Spike	12761580;14988562;15725726;15829968;15944736;15988478;17992189;18495079;19788416;21459846;9841917
15482	SPI1 Gene	protein	dip:DIP-953N;ensembl:ENSG00000066336;ensembl:ENSP00000227163;ensembl:ENSP00000367799;ensembl:ENST00000227163;ensembl:ENST00000378538;entrez-gene:6688;hgnc-id:11241;hgnc-symbol:SPI1;hprd:01305;intact:EBI-2293548;reactome:R-HSA-8865489;reactome:R-HSA-8865503;reactome:R-HSA-8939236;reactome:R-HSA-9616222;refseq:NC_000011;refseq:NM_001080547;refseq:NM_003120;refseq:NP_001074016;refseq:NP_003111;unipr…	transcription factor	1066574	HCK	gene	ensembl:ENSG00000101336;ensembl:ENSP00000365022;ensembl:ENSP00000427757;ensembl:ENSP00000429848;ensembl:ENSP00000441169;ensembl:ENSP00000444986;entrez-gene:3055;hgnc-id:4840;hprd:00796;intact:EBI-2609967;refseq:NM_001172129;refseq:NM_001172130;refseq:NM_001172131;refseq:NM_001172132;refseq:NM_001172133;refseq:NM_002110;refseq:NP_001165600;refseq:NP_001165601;refseq:NP_001165602;refseq:NP_00116560…	transcribed gene	206237	gene regulatory interaction	IntAct	20159610
19009	KLF4	protein	dip:DIP-57667N;ensembl:ENSG00000136826;ensembl:ENSP00000363804;ensembl:ENST00000374672;ensembl:ENST00000374672.4;entrez-gene:9314;hgnc-id:6348;hgnc-symbol:KLF4;hprd:03769;intact:EBI-20740118;intact:EBI-7232405;intact:MINT-7261942;reactome:R-HSA-381340;reactome:R-HSA-422085;reactome:R-HSA-434463;reactome:R-HSA-452723;reactome:R-HSA-5660404;reactome:R-HSA-9617828;refseq:NM_001314052;refseq:NM_00423…	transcription factor	441118	CXCL3	gene	ensembl:ENSG00000163734;entrez-gene:2921;hgnc-symbol:CXCL3;intact:EBI-26479604;refseq:NM_002090;refseq:NP_002081	transcribed gene	136157	gene regulatory interaction	IntAct	33179750
70939	SPARC	protein	dip:DIP-46426N;ensembl:ENSG00000113140;ensembl:ENSP00000231061;ensembl:ENST00000231061;entrez-gene:6678;hgnc-id:11219;hgnc-symbol:SPARC;hprd:01631;intact:EBI-2800983;pdb:1BMO;pdb:1NUB;pdb:1SRA;pdb:2V53;reactome:R-HSA-114608;reactome:R-HSA-114642;reactome:R-HSA-114643;reactome:R-HSA-1251985;reactome:R-HSA-2239456;reactome:R-HSA-3000178;reactome:R-HSA-3000497;reactome:R-HSA-8958057;refseq:NM_003118…	transcription factor	448120	THBS1	gene	ensembl:ENSG00000137801;entrez-gene:7057;hgnc-id:11785;hgnc-symbol:THBS1;hprd:01765;refseq:NM_003246;refseq:NP_003237;uniprot:P07996	transcribed gene	57937	gene regulatory interaction	InnateDB	3402455
4176476	NFkB.complex	protein		transcription factor	51128	MMP14	protein	chembl:3869;dip:DIP-35111N;ensembl:ENSG00000157227;ensembl:ENSP00000308208;ensembl:ENST00000311852;entrez-gene:4323;hgnc-id:7160;hgnc-symbol:MMP14;hprd:02856;humancyc:ENSG00000157227-MONOMER;intact:EBI-992788;pdb:1BQQ;pdb:1BUV;pdb:2MQS;pdb:3C7X;pdb:3MA2;pdb:3X23;pdb:4P3C;pdb:4P3D;pdb:4QXU;pdb:5H0U;pdb:6CLZ;pdb:6CM1;reactome:R-HSA-1442472;reactome:R-HSA-1442490;reactome:R-HSA-1474228;reactome:R-HS…	product	652074	gene regulatory interaction	Spike	11112697
247782	MMP14	gene	ensembl:ENSP00000308208;entrez-gene:4323;hgnc-id:7160;hprd:02856;refseq:NC_000014;refseq:NM_004995;refseq:NP_004986;uniprot:P50281	transcribed gene	51128	MMP14	protein	chembl:3869;dip:DIP-35111N;ensembl:ENSG00000157227;ensembl:ENSP00000308208;ensembl:ENST00000311852;entrez-gene:4323;hgnc-id:7160;hgnc-symbol:MMP14;hprd:02856;humancyc:ENSG00000157227-MONOMER;intact:EBI-992788;pdb:1BQQ;pdb:1BUV;pdb:2MQS;pdb:3C7X;pdb:3MA2;pdb:3X23;pdb:4P3C;pdb:4P3D;pdb:4QXU;pdb:5H0U;pdb:6CLZ;pdb:6CM1;reactome:R-HSA-1442472;reactome:R-HSA-1442490;reactome:R-HSA-1474228;reactome:R-HS…	product	36778;637928;652074	gene regulatory interaction	BIND;PID;Spike	11112697;15546613;15592504
238097	SMAD3/SMAD4/SP1	complex		transcription factor	231345	COL1A2	gene	ensembl:ENSG00000164692;ensembl:ENSP00000297268;entrez-gene:1278;hgnc-id:2198;hgnc-symbol:COL1A2;hprd:00363;intact:EBI-9095879;refseq:NM_000089;refseq:NP_000080;uniprot:P08123	transcribed gene	33426	gene regulatory interaction	PID	11114293;11555647
232859	STAT1-3 (dimer)	group		transcription factor	65541	IL18	protein	dip:DIP-3785N;ensembl:ENSG00000150782;ensembl:ENSP00000280357;ensembl:ENSP00000434161;ensembl:ENSP00000434561;ensembl:ENST00000280357;ensembl:ENST00000524595;ensembl:ENST00000528832;entrez-gene:3606;hgnc-id:5986;hgnc-symbol:IL18;hprd:02976;intact:EBI-11016725;intact:EBI-3910835;pdb:1J0S;pdb:2VXT;pdb:3F62;pdb:3WO2;pdb:3WO3;pdb:3WO4;pdb:4EEE;pdb:4EKX;pdb:4HJJ;pdb:4R6U;pdb:4XFS;pdb:4XFT;pdb:4XFU;rea…	product	36573	gene regulatory interaction	PID	14764690
17735	CEBPB	protein	dip:DIP-35345N;ensembl:ENSG00000172216;ensembl:ENSP00000305422;ensembl:ENST00000303004;entrez-gene:1051;hgnc-id:1834;hgnc-symbol:CEBPB;hprd:01801;intact:EBI-969696;pdb:1GTW;pdb:1GU4;pdb:1GU5;pdb:1H88;pdb:1H89;pdb:1H8A;pdb:1HJB;pdb:1IO4;pdb:2E42;pdb:2E43;pdb:6MG1;pdb:6MG2;pdb:6MG3;reactome:R-HSA-2559582;reactome:R-HSA-380994;reactome:R-HSA-381340;reactome:R-HSA-381378;reactome:R-HSA-3857339;reacto…	transcription factor	15482	SPI1 Gene	protein	dip:DIP-953N;ensembl:ENSG00000066336;ensembl:ENSP00000227163;ensembl:ENSP00000367799;ensembl:ENST00000227163;ensembl:ENST00000378538;entrez-gene:6688;hgnc-id:11241;hgnc-symbol:SPI1;hprd:01305;intact:EBI-2293548;reactome:R-HSA-8865489;reactome:R-HSA-8865503;reactome:R-HSA-8939236;reactome:R-HSA-9616222;refseq:NC_000011;refseq:NM_001080547;refseq:NM_003120;refseq:NP_001074016;refseq:NP_003111;unipr…	transcription factor	35569	gene regulatory interaction	PID	11160269;15187136
233428	CDKN1A	gene	ensembl:ENSG00000124762;ensembl:ENSP00000244741;ensembl:ENSP00000384849;ensembl:ENSP00000409259;ensembl:ENSP00000482768;entrez-gene:1026;hgnc-id:1784;hgnc-symbol:CDKN1A;hprd:00298;intact:EBI-1550784;refseq:NC_000006;refseq:NM_000389;refseq:NM_001220777;refseq:NM_001220778;refseq:NM_001291549;refseq:NM_078467;refseq:NP_000380;refseq:NP_001207706;refseq:NP_001207707;refseq:NP_001278478;refseq:NP_00…	transcribed gene	13423	CDKN1A	protein	dip:DIP-246N;ensembl:ENSG00000124762;ensembl:ENSP00000244741;ensembl:ENSP00000362815;ensembl:ENSP00000384849;ensembl:ENSP00000409259;ensembl:ENSP00000482768;ensembl:ENST00000244741;ensembl:ENST00000373711;ensembl:ENST00000405375;ensembl:ENST00000448526;ensembl:ENST00000615513;entrez-gene:1026;hgnc-id:1784;hgnc-symbol:CDKN1A;hprd:00298;intact:EBI-1550784;intact:EBI-1800051;intact:EBI-21019594;inta…	product	33262;33284;33303;33309;33750;33846;33915;34254;35139;35225;35379;35395;35623;35970;36116;36412;36842;37008;38147;38201;38294;38296;38591;39122;47566;51041;53647;54524;54731;57096;58688;59372;168116;215699;631433;632266;632269;632398;632455;633342;638089;638090;639512;639716;640453;640454;640489;640701;640943;642338;642392;642393;650624;650650;650753;650804;650883;650891;650918;650959;650984;6510…	gene regulatory interaction	BIND;BioCarta;InnateDB;IntAct;PID;Spike	10030670;10076995;10435630;10878024;10920185;11080152;11136975;11314031;11391529;11432830;11804596;11844794;12213815;12374749;12384701;12482952;12534345;12545156;12690110;12874834;14517667;14673169;14726409;14729964;14988562;15041706;15084259;15286281;15286705;15509808;15545268;15546622;15580267;15616584;15660129;15674334;15674341;15710329;15716956;15765097;15780936;15780937;15856012;15856024;158…
66429	CEBPD	protein	dip:DIP-146N;ensembl:ENSG00000221869;ensembl:ENSP00000386165;ensembl:ENST00000408965;entrez-gene:1052;hgnc-id:1835;hgnc-symbol:CEBPD;hprd:00297;intact:EBI-7962058;intact:MINT-6609320;reactome:R-HSA-381280;reactome:R-HSA-381340;reactome:R-HSA-6785807;reactome:R-HSA-9610379;refseq:NM_005195;refseq:NP_005186;uniprot:CEBPD_HUMAN;uniprot:P49716;uniprot:Q14937;uniprot:Q2M2X9	transcription factor	285680	LPL	gene	ensembl:ENSG00000175445;entrez-gene:4023;hgnc-symbol:LPL	product	51308	gene regulatory interaction	InnateDB	25889814
232859	STAT1-3 (dimer)	group		transcription factor	250359	IL18	gene	ensembl:ENSG00000150782;ensembl:ENSP00000280357;ensembl:ENSP00000434561;entrez-gene:3606;hgnc-id:5986;hprd:02976;intact:EBI-26483990;refseq:NM_001243211;refseq:NM_001562;refseq:NP_001230140;refseq:NP_001553;refseq:XM_011542805;refseq:XM_011542806;refseq:XP_011541107;refseq:XP_011541108;uniprot:Q14116	transcribed gene	36573	gene regulatory interaction	PID	14764690
66429	CEBPD	protein	dip:DIP-146N;ensembl:ENSG00000221869;ensembl:ENSP00000386165;ensembl:ENST00000408965;entrez-gene:1052;hgnc-id:1835;hgnc-symbol:CEBPD;hprd:00297;intact:EBI-7962058;intact:MINT-6609320;reactome:R-HSA-381280;reactome:R-HSA-381340;reactome:R-HSA-6785807;reactome:R-HSA-9610379;refseq:NM_005195;refseq:NP_005186;uniprot:CEBPD_HUMAN;uniprot:P49716;uniprot:Q14937;uniprot:Q2M2X9	transcription factor	232364	PTGS2	gene	ensembl:ENSG00000073756;ensembl:ENSP00000356438;entrez-gene:5743;hgnc-id:9605;hgnc-symbol:PTGS2;hprd:02599;intact:EBI-5590670;refseq:NM_000963;refseq:NP_000954;uniprot:P35354	product	48194;55427;57420	gene regulatory interaction	InnateDB;IntAct	16397300;18820298;21072181
4176580	AP-1_I.complex	protein		transcription factor	55165	IL10	protein	dip:DIP-3511N;ensembl:ENSG00000136634;ensembl:ENSP00000412237;ensembl:ENST00000423557;entrez-gene:3586;hgnc-id:5962;hgnc-symbol:IL10;hprd:00495;intact:EBI-1031632;pdb:1ILK;pdb:1INR;pdb:1J7V;pdb:1LK3;pdb:1Y6K;pdb:2H24;pdb:2ILK;reactome:R-HSA-447125;reactome:R-HSA-6783783;reactome:R-HSA-6785807;reactome:R-HSA-6790020;reactome:R-HSA-8950505;reactome:R-HSA-9662834;reactome:R-HSA-9664323;refseq:NM_000…	product	652104	gene regulatory interaction	Spike	12649301
2342090	APP	gene	ensembl:ENSP00000284981;ensembl:ENSP00000345463;ensembl:ENSP00000346129;ensembl:ENSP00000350578;ensembl:ENSP00000352760;entrez-gene:351;hgnc-id:620;hprd:00100;refseq:NM_000484;refseq:NM_001136016;refseq:NM_001136129;refseq:NM_001136130;refseq:NM_001136131;refseq:NM_001204301;refseq:NM_001204302;refseq:NM_001204303;refseq:NM_201413;refseq:NM_201414;refseq:NP_000475;refseq:NP_001129488;refseq:NP_00…	transcribed gene	32341	APP	protein	chembl:2487;dip:DIP-574N;ensembl:ENSG00000142192;ensembl:ENSP00000284981;ensembl:ENSP00000345463;ensembl:ENSP00000346129;ensembl:ENSP00000350578;ensembl:ENSP00000351796;ensembl:ENSP00000352760;ensembl:ENSP00000387483;ensembl:ENST00000346798;ensembl:ENST00000348990;ensembl:ENST00000354192;ensembl:ENST00000357903;ensembl:ENST00000358918;ensembl:ENST00000440126;entrez-gene:351;hgnc-id:620;hgnc-symbo…	product	650658	gene regulatory interaction	Spike
51150	MMP9	protein	chembl:321;dip:DIP-29518N;ensembl:ENSG00000100985;ensembl:ENSP00000361405;ensembl:ENST00000372330;entrez-gene:4318;hgnc-id:7176;hgnc-symbol:MMP9;hprd:00387;humancyc:HS02175-MONOMER;intact:EBI-1382326;pdb:1GKC;pdb:1GKD;pdb:1ITV;pdb:1L6J;pdb:1LKG;pdb:2OVX;pdb:2OVZ;pdb:2OW0;pdb:2OW1;pdb:2OW2;pdb:4H1Q;pdb:4H2E;pdb:4H3X;pdb:4H82;pdb:4HMA;pdb:4JIJ;pdb:4JQG;pdb:4WZV;pdb:4XCT;pdb:5CUH;pdb:5I12;pdb:5TH6;p…	transcription factor	443616	CXCL2	gene	ensembl:ENSG00000081041;entrez-gene:2920;hgnc-symbol:CXCL2;intact:EBI-10050550;refseq:NP_002080	transcribed gene	55406	gene regulatory interaction	InnateDB	18660381
15482	SPI1 Gene	protein	dip:DIP-953N;ensembl:ENSG00000066336;ensembl:ENSP00000227163;ensembl:ENSP00000367799;ensembl:ENST00000227163;ensembl:ENST00000378538;entrez-gene:6688;hgnc-id:11241;hgnc-symbol:SPI1;hprd:01305;intact:EBI-2293548;reactome:R-HSA-8865489;reactome:R-HSA-8865503;reactome:R-HSA-8939236;reactome:R-HSA-9616222;refseq:NC_000011;refseq:NM_001080547;refseq:NM_003120;refseq:NP_001074016;refseq:NP_003111;unipr…	transcription factor	431693	CD68	gene	ensembl:ENSG00000129226;entrez-gene:968;hgnc-symbol:CD68;refseq:NM_001251	transcribed gene	652279	gene regulatory interaction	Spike	12676954
14013	MDM2	protein	chembl:5023;dip:DIP-392N;ensembl:ENSG00000135679;ensembl:ENSP00000348637;ensembl:ENSP00000417281;entrez-gene:4193;hgnc-id:6973;hgnc-symbol:MDM2;hprd:01272;intact:EBI-2694074;intact:EBI-389668;intact:EBI-5279149;pdb:1RV1;reactome:R-HSA-198638;reactome:R-HSA-198644;reactome:R-HSA-3000408;reactome:R-HSA-3700996;reactome:R-HSA-416843;reactome:R-HSA-416849;reactome:R-HSA-6782472;reactome:R-HSA-6792862…	transcription factor	233428	CDKN1A	gene	ensembl:ENSG00000124762;ensembl:ENSP00000244741;ensembl:ENSP00000384849;ensembl:ENSP00000409259;ensembl:ENSP00000482768;entrez-gene:1026;hgnc-id:1784;hgnc-symbol:CDKN1A;hprd:00298;intact:EBI-1550784;refseq:NC_000006;refseq:NM_000389;refseq:NM_001220777;refseq:NM_001220778;refseq:NM_001291549;refseq:NM_078467;refseq:NP_000380;refseq:NP_001207706;refseq:NP_001207707;refseq:NP_001278478;refseq:NP_00…	transcribed gene	193157;632266	gene regulatory interaction	BIND;IntAct	15546622;18485870
4299397	SPARC	gene	entrez-gene:6678	transcribed gene	70939	SPARC	protein	dip:DIP-46426N;ensembl:ENSG00000113140;ensembl:ENSP00000231061;ensembl:ENST00000231061;entrez-gene:6678;hgnc-id:11219;hgnc-symbol:SPARC;hprd:01631;intact:EBI-2800983;pdb:1BMO;pdb:1NUB;pdb:1SRA;pdb:2V53;reactome:R-HSA-114608;reactome:R-HSA-114642;reactome:R-HSA-114643;reactome:R-HSA-1251985;reactome:R-HSA-2239456;reactome:R-HSA-3000178;reactome:R-HSA-3000497;reactome:R-HSA-8958057;refseq:NM_003118…	product	650727	gene regulatory interaction	Spike	10777211;11042689
4176476	NFkB.complex	protein		transcription factor	72310	TLR2	protein	chembl:4163;dip:DIP-35138N;ensembl:ENSG00000137462;ensembl:ENSP00000260010;ensembl:ENSP00000494425;ensembl:ENSP00000495339;ensembl:ENST00000260010;ensembl:ENST00000642580;ensembl:ENST00000642700;entrez-gene:7097;hgnc-id:11848;hgnc-symbol:TLR2;hprd:04323;intact:EBI-973722;pdb:1FYW;pdb:1FYX;pdb:1O77;pdb:2Z7X;pdb:2Z80;pdb:6NIG;reactome:R-HSA-1236974;reactome:R-HSA-1461957;reactome:R-HSA-166058;react…	product	650957	gene regulatory interaction	Spike	11254708
65540	IL1A	protein	dip:DIP-40550N;ensembl:ENSG00000115008;ensembl:ENSP00000263339;ensembl:ENST00000263339;entrez-gene:3552;hgnc-id:5991;hgnc-symbol:IL1A;hprd:00988;intact:EBI-1749782;intact:EBI-25426237;pdb:1ITA;pdb:2ILA;pdb:2KKI;pdb:2L5X;pdb:5UC6;reactome:R-HSA-2559582;reactome:R-HSA-445746;reactome:R-HSA-448706;reactome:R-HSA-449042;reactome:R-HSA-449054;reactome:R-HSA-449059;reactome:R-HSA-4568733;reactome:R-HSA…	transcription factor	32341	APP	protein	chembl:2487;dip:DIP-574N;ensembl:ENSG00000142192;ensembl:ENSP00000284981;ensembl:ENSP00000345463;ensembl:ENSP00000346129;ensembl:ENSP00000350578;ensembl:ENSP00000351796;ensembl:ENSP00000352760;ensembl:ENSP00000387483;ensembl:ENST00000346798;ensembl:ENST00000348990;ensembl:ENST00000354192;ensembl:ENST00000357903;ensembl:ENST00000358918;ensembl:ENST00000440126;entrez-gene:351;hgnc-id:620;hgnc-symbo…	product	650658	gene regulatory interaction	Spike
65540	IL1A	protein	dip:DIP-40550N;ensembl:ENSG00000115008;ensembl:ENSP00000263339;ensembl:ENST00000263339;entrez-gene:3552;hgnc-id:5991;hgnc-symbol:IL1A;hprd:00988;intact:EBI-1749782;intact:EBI-25426237;pdb:1ITA;pdb:2ILA;pdb:2KKI;pdb:2L5X;pdb:5UC6;reactome:R-HSA-2559582;reactome:R-HSA-445746;reactome:R-HSA-448706;reactome:R-HSA-449042;reactome:R-HSA-449054;reactome:R-HSA-449059;reactome:R-HSA-4568733;reactome:R-HSA…	transcription factor	2342090	APP	gene	ensembl:ENSP00000284981;ensembl:ENSP00000345463;ensembl:ENSP00000346129;ensembl:ENSP00000350578;ensembl:ENSP00000352760;entrez-gene:351;hgnc-id:620;hprd:00100;refseq:NM_000484;refseq:NM_001136016;refseq:NM_001136129;refseq:NM_001136130;refseq:NM_001136131;refseq:NM_001204301;refseq:NM_001204302;refseq:NM_001204303;refseq:NM_201413;refseq:NM_201414;refseq:NP_000475;refseq:NP_001129488;refseq:NP_00…	transcribed gene	650658	gene regulatory interaction	Spike
4176580	AP-1_I.complex	protein		transcription factor	54001	CXCL2	protein	dip:DIP-5908N;ensembl:ENSG00000081041;ensembl:ENSP00000427279;ensembl:ENST00000508487;entrez-gene:2920;hgnc-id:4603;hprd:00741;intact:EBI-2114901;pdb:1QNK;pdb:5OB5;reactome:R-HSA-373777;reactome:R-HSA-380108;reactome:R-HSA-418594;reactome:R-HSA-6783783;refseq:NM_002089;refseq:NP_002080;uniprot:CXCL2_HUMAN;uniprot:MIP2A_HUMAN;uniprot:P19875;uniprot:Q6FGD6;uniprot:Q9UPB8	product	650681	gene regulatory interaction	Spike	14597166
233423	TAp63g (tetramer)/SSRP1	complex		transcription factor	14013	MDM2	protein	chembl:5023;dip:DIP-392N;ensembl:ENSG00000135679;ensembl:ENSP00000348637;ensembl:ENSP00000417281;entrez-gene:4193;hgnc-id:6973;hgnc-symbol:MDM2;hprd:01272;intact:EBI-2694074;intact:EBI-389668;intact:EBI-5279149;pdb:1RV1;reactome:R-HSA-198638;reactome:R-HSA-198644;reactome:R-HSA-3000408;reactome:R-HSA-3700996;reactome:R-HSA-416843;reactome:R-HSA-416849;reactome:R-HSA-6782472;reactome:R-HSA-6792862…	product	35971	gene regulatory interaction	PID	12374749
4176580	AP-1_I.complex	protein		repressor	233428	CDKN1A	gene	ensembl:ENSG00000124762;ensembl:ENSP00000244741;ensembl:ENSP00000384849;ensembl:ENSP00000409259;ensembl:ENSP00000482768;entrez-gene:1026;hgnc-id:1784;hgnc-symbol:CDKN1A;hprd:00298;intact:EBI-1550784;refseq:NC_000006;refseq:NM_000389;refseq:NM_001220777;refseq:NM_001220778;refseq:NM_001291549;refseq:NM_078467;refseq:NP_000380;refseq:NP_001207706;refseq:NP_001207707;refseq:NP_001278478;refseq:NP_00…	transcribed gene	651686	gene regulatory interaction	Spike	11136975
51166	MMP12	protein	chembl:4393;ensembl:ENSG00000110347;ensembl:ENSG00000262406;ensembl:ENSP00000458585;ensembl:ENST00000571244;entrez-gene:4321;hgnc-id:7158;hgnc-symbol:MMP12;hprd:03027;humancyc:HS03303-MONOMER;intact:EBI-7881912;intact:MINT-7709562;pdb:1JIZ;pdb:1JK3;pdb:1OS2;pdb:1OS9;pdb:1RMZ;pdb:1ROS;pdb:1UTT;pdb:1UTZ;pdb:1Y93;pdb:1YCM;pdb:1Z3J;pdb:2HU6;pdb:2JXY;pdb:2K2G;pdb:2K9C;pdb:2KRJ;pdb:2MLR;pdb:2MLS;pdb:2N…	transcription factor	441118	CXCL3	gene	ensembl:ENSG00000163734;entrez-gene:2921;hgnc-symbol:CXCL3;intact:EBI-26479604;refseq:NM_002090;refseq:NP_002081	transcribed gene	56742	gene regulatory interaction	InnateDB	18660381
26888	TNFRSF1B	protein	dip:DIP-78N;ensembl:ENSG00000028137;ensembl:ENSP00000365435;ensembl:ENST00000376259;entrez-gene:7133;hgnc-id:11917;hgnc-symbol:TNFRSF1B;hprd:01862;intact:EBI-358983;intact:EBI-8775634;pdb:1CA9;pdb:3ALQ;reactome:R-HSA-5661484;reactome:R-HSA-5668541;reactome:R-HSA-5669034;reactome:R-HSA-6783783;reactome:R-HSA-6785807;reactome:R-HSA-6798695;reactome:R-HSA-6806149;refseq:NM_001066;refseq:NP_001057;un…	transcription factor	232598	TNF	gene	ensembl:ENSG00000204490;ensembl:ENSG00000206439;ensembl:ENSG00000223952;ensembl:ENSG00000228321;ensembl:ENSG00000228849;ensembl:ENSG00000230108;ensembl:ENSG00000232810;ensembl:ENSP00000398698;entrez-gene:7124;hgnc-id:11892;hgnc-symbol:TNF;hprd:01855;intact:EBI-26489272;refseq:NC_000006;refseq:NM_000594;refseq:NP_000585;uniprot:P01375	product	56119	gene regulatory interaction	InnateDB	11448951;14743216;19287455
4176580	AP-1_I.complex	protein		transcription factor	17735	CEBPB	protein	dip:DIP-35345N;ensembl:ENSG00000172216;ensembl:ENSP00000305422;ensembl:ENST00000303004;entrez-gene:1051;hgnc-id:1834;hgnc-symbol:CEBPB;hprd:01801;intact:EBI-969696;pdb:1GTW;pdb:1GU4;pdb:1GU5;pdb:1H88;pdb:1H89;pdb:1H8A;pdb:1HJB;pdb:1IO4;pdb:2E42;pdb:2E43;pdb:6MG1;pdb:6MG2;pdb:6MG3;reactome:R-HSA-2559582;reactome:R-HSA-380994;reactome:R-HSA-381340;reactome:R-HSA-381378;reactome:R-HSA-3857339;reacto…	product	652325	gene regulatory interaction	Spike	12215258
15482	SPI1 Gene	protein	dip:DIP-953N;ensembl:ENSG00000066336;ensembl:ENSP00000227163;ensembl:ENSP00000367799;ensembl:ENST00000227163;ensembl:ENST00000378538;entrez-gene:6688;hgnc-id:11241;hgnc-symbol:SPI1;hprd:01305;intact:EBI-2293548;reactome:R-HSA-8865489;reactome:R-HSA-8865503;reactome:R-HSA-8939236;reactome:R-HSA-9616222;refseq:NC_000011;refseq:NM_001080547;refseq:NM_003120;refseq:NP_001074016;refseq:NP_003111;unipr…	transcription factor	52782	CYBB	protein	dip:DIP-42005N;ensembl:ENSG00000165168;ensembl:ENSP00000367851;ensembl:ENST00000378588;entrez-gene:1536;hgnc-id:2578;hgnc-symbol:CYBB;hprd:02382;humancyc:HS09192-MONOMER;intact:EBI-6253630;pdb:3A1F;reactome:R-HSA-1222445;reactome:R-HSA-1222556;reactome:R-HSA-1236973;reactome:R-HSA-3299685;reactome:R-HSA-4420097;reactome:R-HSA-5218720;reactome:R-HSA-5668599;reactome:R-HSA-6798695;reactome:R-HSA-67…	product	651713	gene regulatory interaction	Spike	10233904
15482	SPI1 Gene	protein	dip:DIP-953N;ensembl:ENSG00000066336;ensembl:ENSP00000227163;ensembl:ENSP00000367799;ensembl:ENST00000227163;ensembl:ENST00000378538;entrez-gene:6688;hgnc-id:11241;hgnc-symbol:SPI1;hprd:01305;intact:EBI-2293548;reactome:R-HSA-8865489;reactome:R-HSA-8865503;reactome:R-HSA-8939236;reactome:R-HSA-9616222;refseq:NC_000011;refseq:NM_001080547;refseq:NM_003120;refseq:NP_001074016;refseq:NP_003111;unipr…	transcription factor	10106	LY96	protein	dip:DIP-38571N;ensembl:ENSG00000154589;ensembl:ENSP00000284818;ensembl:ENSP00000430533;ensembl:ENST00000284818;ensembl:ENST00000518893;entrez-gene:23643;hgnc-id:17156;hgnc-symbol:LY96;hprd:05579;intact:EBI-1539247;pdb:1T2Z;pdb:2E56;pdb:2E59;pdb:2Z65;pdb:3FXI;pdb:3ULA;pdb:4G8A;reactome:R-HSA-1236974;reactome:R-HSA-140534;reactome:R-HSA-166016;reactome:R-HSA-166047;reactome:R-HSA-166058;reactome:R-…	product	651878	gene regulatory interaction	Spike	19632992
4176580	AP-1_I.complex	protein		transcription factor	4213	PTGS2	protein	chembl:230;dip:DIP-28131N;ensembl:ENSG00000073756;ensembl:ENSP00000356438;ensembl:ENST00000367468;entrez-gene:5743;hgnc-id:9605;hgnc-symbol:PTGS2;hprd:02599;humancyc:HS01115-MONOMER;intact:EBI-21293019;intact:EBI-21293046;intact:EBI-5590949;intact:EBI-6662113;kegg:hsa:5743;pdb:1V0X;pdb:5F19;pdb:5F1A;pdb:5IKQ;pdb:5IKR;pdb:5IKT;pdb:5IKV;pdb:5KIR;reactome:R-HSA-197264;reactome:R-HSA-2142770;reactome…	product	652369	gene regulatory interaction	Spike	11292836;12068008
250359	IL18	gene	ensembl:ENSG00000150782;ensembl:ENSP00000280357;ensembl:ENSP00000434561;entrez-gene:3606;hgnc-id:5986;hprd:02976;intact:EBI-26483990;refseq:NM_001243211;refseq:NM_001562;refseq:NP_001230140;refseq:NP_001553;refseq:XM_011542805;refseq:XM_011542806;refseq:XP_011541107;refseq:XP_011541108;uniprot:Q14116	transcribed gene	65541	IL18	protein	dip:DIP-3785N;ensembl:ENSG00000150782;ensembl:ENSP00000280357;ensembl:ENSP00000434161;ensembl:ENSP00000434561;ensembl:ENST00000280357;ensembl:ENST00000524595;ensembl:ENST00000528832;entrez-gene:3606;hgnc-id:5986;hgnc-symbol:IL18;hprd:02976;intact:EBI-11016725;intact:EBI-3910835;pdb:1J0S;pdb:2VXT;pdb:3F62;pdb:3WO2;pdb:3WO3;pdb:3WO4;pdb:4EEE;pdb:4EKX;pdb:4HJJ;pdb:4R6U;pdb:4XFS;pdb:4XFT;pdb:4XFU;rea…	product	36573;650722;650851	gene regulatory interaction	PID;Spike	10975835;11377701;12684057;14764690
51166	MMP12	protein	chembl:4393;ensembl:ENSG00000110347;ensembl:ENSG00000262406;ensembl:ENSP00000458585;ensembl:ENST00000571244;entrez-gene:4321;hgnc-id:7158;hgnc-symbol:MMP12;hprd:03027;humancyc:HS03303-MONOMER;intact:EBI-7881912;intact:MINT-7709562;pdb:1JIZ;pdb:1JK3;pdb:1OS2;pdb:1OS9;pdb:1RMZ;pdb:1ROS;pdb:1UTT;pdb:1UTZ;pdb:1Y93;pdb:1YCM;pdb:1Z3J;pdb:2HU6;pdb:2JXY;pdb:2K2G;pdb:2K9C;pdb:2KRJ;pdb:2MLR;pdb:2MLS;pdb:2N…	transcription factor	443616	CXCL2	gene	ensembl:ENSG00000081041;entrez-gene:2920;hgnc-symbol:CXCL2;intact:EBI-10050550;refseq:NP_002080	product	55039	gene regulatory interaction	InnateDB	18660381
17735	CEBPB	protein	dip:DIP-35345N;ensembl:ENSG00000172216;ensembl:ENSP00000305422;ensembl:ENST00000303004;entrez-gene:1051;hgnc-id:1834;hgnc-symbol:CEBPB;hprd:01801;intact:EBI-969696;pdb:1GTW;pdb:1GU4;pdb:1GU5;pdb:1H88;pdb:1H89;pdb:1H8A;pdb:1HJB;pdb:1IO4;pdb:2E42;pdb:2E43;pdb:6MG1;pdb:6MG2;pdb:6MG3;reactome:R-HSA-2559582;reactome:R-HSA-380994;reactome:R-HSA-381340;reactome:R-HSA-381378;reactome:R-HSA-3857339;reacto…	transcription factor	248516	CCR5	gene	ensembl:ENSG00000160791;entrez-gene:1234;hgnc-symbol:CCR5;uniprot:P51681	transcribed gene	56475	gene regulatory interaction	InnateDB	19717648
3430197	PTGIR	gene	ensembl:ENSP00000291294;entrez-gene:5739;hgnc-id:9602;hprd:08959;refseq:NM_000960;refseq:NP_000951;refseq:XM_005259093;refseq:XM_005259095;uniprot:P43119	transcribed gene	33700	PTGIR	protein	chembl:1995;ensembl:ENSG00000160013;ensembl:ENSP00000291294;ensembl:ENST00000291294;entrez-gene:5739;hgnc-id:9602;hgnc-symbol:PTGIR;hprd:08959;intact:EBI-21748840;reactome:R-HSA-391834;reactome:R-HSA-391908;reactome:R-HSA-392851;reactome:R-HSA-418555;reactome:R-HSA-9660821;refseq:NM_000960;refseq:NP_000951;refseq:XM_005259093;refseq:XM_005259095;uniprot:P43119;uniprot:PI2R_HUMAN	product	651853	gene regulatory interaction	Spike	19118563
15482	SPI1 Gene	protein	dip:DIP-953N;ensembl:ENSG00000066336;ensembl:ENSP00000227163;ensembl:ENSP00000367799;ensembl:ENST00000227163;ensembl:ENST00000378538;entrez-gene:6688;hgnc-id:11241;hgnc-symbol:SPI1;hprd:01305;intact:EBI-2293548;reactome:R-HSA-8865489;reactome:R-HSA-8865503;reactome:R-HSA-8939236;reactome:R-HSA-9616222;refseq:NC_000011;refseq:NM_001080547;refseq:NM_003120;refseq:NP_001074016;refseq:NP_003111;unipr…	transcription factor	89040	SLC11A1	protein	entrez-gene:6556;reactome:R-HSA-437103;reactome:R-HSA-6803283;reactome:R-HSA-6803331;reactome:R-HSA-6803350;uniprot:C0H5Y3;uniprot:NRAM1_HUMAN;uniprot:P49279;uniprot:Q8IV72;uniprot:Q8IV72_HUMAN	product	33841	gene regulatory interaction	PID	15506972;18045875
15482	SPI1 Gene	protein	dip:DIP-953N;ensembl:ENSG00000066336;ensembl:ENSP00000227163;ensembl:ENSP00000367799;ensembl:ENST00000227163;ensembl:ENST00000378538;entrez-gene:6688;hgnc-id:11241;hgnc-symbol:SPI1;hprd:01305;intact:EBI-2293548;reactome:R-HSA-8865489;reactome:R-HSA-8865503;reactome:R-HSA-8939236;reactome:R-HSA-9616222;refseq:NC_000011;refseq:NM_001080547;refseq:NM_003120;refseq:NP_001074016;refseq:NP_003111;unipr…	transcription factor	133783	LYZ	protein	ensembl:ENSG00000090382;ensembl:ENSP00000261267;ensembl:ENST00000261267;entrez-gene:4069;hgnc-id:6740;hgnc-symbol:LYZ;hprd:01085;humancyc:HS01687-MONOMER;intact:EBI-355360;pdb:133L;pdb:134L;pdb:1B5U;pdb:1B5V;pdb:1B5W;pdb:1B5X;pdb:1B5Y;pdb:1B5Z;pdb:1B7L;pdb:1B7M;pdb:1B7N;pdb:1B7O;pdb:1B7P;pdb:1B7Q;pdb:1B7R;pdb:1B7S;pdb:1BB3;pdb:1BB4;pdb:1BB5;pdb:1C43;pdb:1C45;pdb:1C46;pdb:1C7P;pdb:1CJ6;pdb:1CJ7;pd…	product	35317	gene regulatory interaction	PID	17959653
4176476	NFkB.complex	protein		transcription factor	237384	IL6	gene	ensembl:ENSG00000136244;ensembl:ENSP00000258743;entrez-gene:3569;hgnc-id:6018;hgnc-symbol:IL6;hprd:00970;intact:EBI-11316349;refseq:NM_000600;refseq:NP_000591;refseq:XM_005249745;refseq:XP_011513692;uniprot:P05231	transcribed gene	650990	gene regulatory interaction	Spike	10501190;1644898;2183031
396913	ZBTB4	protein	ensembl:ENSG00000174282;ensembl:ENSG00000283868;ensembl:ENSP00000307858;ensembl:ENSP00000369973;ensembl:ENSP00000492232;ensembl:ENSP00000492616;ensembl:ENST00000311403;ensembl:ENST00000380599;ensembl:ENST00000639670;ensembl:ENST00000639962;entrez-gene:57659;hgnc-id:23847;hprd:11693;intact:EBI-2564133;refseq:NM_001128833;refseq:NM_020899;refseq:NP_001122305;refseq:NP_065950;refseq:XM_006721563;ref…	repressor	13423	CDKN1A	protein	dip:DIP-246N;ensembl:ENSG00000124762;ensembl:ENSP00000244741;ensembl:ENSP00000362815;ensembl:ENSP00000384849;ensembl:ENSP00000409259;ensembl:ENSP00000482768;ensembl:ENST00000244741;ensembl:ENST00000373711;ensembl:ENST00000405375;ensembl:ENST00000448526;ensembl:ENST00000615513;entrez-gene:1026;hgnc-id:1784;hgnc-symbol:CDKN1A;hprd:00298;intact:EBI-1550784;intact:EBI-1800051;intact:EBI-21019594;inta…	product	650891	gene regulatory interaction	Spike	18451802
443616	CXCL2	gene	ensembl:ENSG00000081041;entrez-gene:2920;hgnc-symbol:CXCL2;intact:EBI-10050550;refseq:NP_002080	transcribed gene	54001	CXCL2	protein	dip:DIP-5908N;ensembl:ENSG00000081041;ensembl:ENSP00000427279;ensembl:ENST00000508487;entrez-gene:2920;hgnc-id:4603;hprd:00741;intact:EBI-2114901;pdb:1QNK;pdb:5OB5;reactome:R-HSA-373777;reactome:R-HSA-380108;reactome:R-HSA-418594;reactome:R-HSA-6783783;refseq:NM_002089;refseq:NP_002080;uniprot:CXCL2_HUMAN;uniprot:MIP2A_HUMAN;uniprot:P19875;uniprot:Q6FGD6;uniprot:Q9UPB8	product	650681;651895;651939	gene regulatory interaction	Spike	14597166;17360647;8576166
4176476	NFkB.complex	protein		transcription factor	65539	IL1B	protein	dip:DIP-474N;ensembl:ENSG00000125538;ensembl:ENSP00000263341;ensembl:ENST00000263341;entrez-gene:3553;hgnc-id:5992;hgnc-symbol:IL1B;hprd:00985;intact:EBI-10051097;intact:EBI-1026290;pdb:1HIB;pdb:1I1B;pdb:1IOB;pdb:1ITB;pdb:1L2H;pdb:1S0L;pdb:1T4Q;pdb:1TOO;pdb:1TP0;pdb:1TWE;pdb:1TWM;pdb:21BI;pdb:2I1B;pdb:2KH2;pdb:2NVH;pdb:31BI;pdb:3LTQ;pdb:3O4O;pdb:3POK;pdb:41BI;pdb:4DEP;pdb:4G6J;pdb:4G6M;pdb:4GAF;p…	product	650723	gene regulatory interaction	Spike	8021507;8413223
4176476	NFkB.complex	protein		transcription factor	13018	FAS	protein	dip:DIP-924N;ensembl:ENSG00000026103;ensembl:ENSP00000347426;ensembl:ENSP00000347979;ensembl:ENSP00000349896;ensembl:ENSP00000420975;ensembl:ENSP00000422453;ensembl:ENSP00000423755;ensembl:ENSP00000424113;ensembl:ENSP00000425159;ensembl:ENSP00000477997;ensembl:ENSP00000498466;ensembl:ENST00000355279;ensembl:ENST00000357339;ensembl:ENST00000479522;ensembl:ENST00000484444;ensembl:ENST00000488877;en…	product	651247	gene regulatory interaction	Spike	12761580
4176580	AP-1_I.complex	protein		transcription factor	141801	NQO1	protein	chembl:3623;dip:DIP-24210N;ensembl:ENSG00000181019;ensembl:ENSP00000319788;ensembl:ENSP00000368334;ensembl:ENSP00000368335;ensembl:ENST00000320623;ensembl:ENST00000379046;ensembl:ENST00000379047;entrez-gene:1728;hgnc-id:2874;hgnc-symbol:NQO1;hprd:00518;humancyc:HS11566-MONOMER;intact:EBI-3989435;kegg:hsa:1728;pdb:1D4A;pdb:1DXO;pdb:1GG5;pdb:1H66;pdb:1H69;pdb:1KBO;pdb:1KBQ;pdb:1QBG;pdb:2F1O;pdb:3JS…	product	651747	gene regulatory interaction	Spike	8962164
396913	ZBTB4	protein	ensembl:ENSG00000174282;ensembl:ENSG00000283868;ensembl:ENSP00000307858;ensembl:ENSP00000369973;ensembl:ENSP00000492232;ensembl:ENSP00000492616;ensembl:ENST00000311403;ensembl:ENST00000380599;ensembl:ENST00000639670;ensembl:ENST00000639962;entrez-gene:57659;hgnc-id:23847;hprd:11693;intact:EBI-2564133;refseq:NM_001128833;refseq:NM_020899;refseq:NP_001122305;refseq:NP_065950;refseq:XM_006721563;ref…	repressor	233428	CDKN1A	gene	ensembl:ENSG00000124762;ensembl:ENSP00000244741;ensembl:ENSP00000384849;ensembl:ENSP00000409259;ensembl:ENSP00000482768;entrez-gene:1026;hgnc-id:1784;hgnc-symbol:CDKN1A;hprd:00298;intact:EBI-1550784;refseq:NC_000006;refseq:NM_000389;refseq:NM_001220777;refseq:NM_001220778;refseq:NM_001291549;refseq:NM_078467;refseq:NP_000380;refseq:NP_001207706;refseq:NP_001207707;refseq:NP_001278478;refseq:NP_00…	transcribed gene	650891	gene regulatory interaction	Spike	18451802
15482	SPI1 Gene	protein	dip:DIP-953N;ensembl:ENSG00000066336;ensembl:ENSP00000227163;ensembl:ENSP00000367799;ensembl:ENST00000227163;ensembl:ENST00000378538;entrez-gene:6688;hgnc-id:11241;hgnc-symbol:SPI1;hprd:01305;intact:EBI-2293548;reactome:R-HSA-8865489;reactome:R-HSA-8865503;reactome:R-HSA-8939236;reactome:R-HSA-9616222;refseq:NC_000011;refseq:NM_001080547;refseq:NM_003120;refseq:NP_001074016;refseq:NP_003111;unipr…	transcription factor	3430197	PTGIR	gene	ensembl:ENSP00000291294;entrez-gene:5739;hgnc-id:9602;hprd:08959;refseq:NM_000960;refseq:NP_000951;refseq:XM_005259093;refseq:XM_005259095;uniprot:P43119	transcribed gene	651853	gene regulatory interaction	Spike	19118563
245034	LYZ	gene	ensembl:ENSG00000090382;entrez-gene:4069;hgnc-symbol:LYZ;uniprot:P61626	transcribed gene	133783	LYZ	protein	ensembl:ENSG00000090382;ensembl:ENSP00000261267;ensembl:ENST00000261267;entrez-gene:4069;hgnc-id:6740;hgnc-symbol:LYZ;hprd:01085;humancyc:HS01687-MONOMER;intact:EBI-355360;pdb:133L;pdb:134L;pdb:1B5U;pdb:1B5V;pdb:1B5W;pdb:1B5X;pdb:1B5Y;pdb:1B5Z;pdb:1B7L;pdb:1B7M;pdb:1B7N;pdb:1B7O;pdb:1B7P;pdb:1B7Q;pdb:1B7R;pdb:1B7S;pdb:1BB3;pdb:1BB4;pdb:1BB5;pdb:1C43;pdb:1C45;pdb:1C46;pdb:1C7P;pdb:1CJ6;pdb:1CJ7;pd…	product	35317;650867	gene regulatory interaction	PID;Spike	15676205;17959653
4304438	LY96	gene	entrez-gene:23643	transcribed gene	10106	LY96	protein	dip:DIP-38571N;ensembl:ENSG00000154589;ensembl:ENSP00000284818;ensembl:ENSP00000430533;ensembl:ENST00000284818;ensembl:ENST00000518893;entrez-gene:23643;hgnc-id:17156;hgnc-symbol:LY96;hprd:05579;intact:EBI-1539247;pdb:1T2Z;pdb:2E56;pdb:2E59;pdb:2Z65;pdb:3FXI;pdb:3ULA;pdb:4G8A;reactome:R-HSA-1236974;reactome:R-HSA-140534;reactome:R-HSA-166016;reactome:R-HSA-166047;reactome:R-HSA-166058;reactome:R-…	product	651878	gene regulatory interaction	Spike	19632992
15482	SPI1 Gene	protein	dip:DIP-953N;ensembl:ENSG00000066336;ensembl:ENSP00000227163;ensembl:ENSP00000367799;ensembl:ENST00000227163;ensembl:ENST00000378538;entrez-gene:6688;hgnc-id:11241;hgnc-symbol:SPI1;hprd:01305;intact:EBI-2293548;reactome:R-HSA-8865489;reactome:R-HSA-8865503;reactome:R-HSA-8939236;reactome:R-HSA-9616222;refseq:NC_000011;refseq:NM_001080547;refseq:NM_003120;refseq:NP_001074016;refseq:NP_003111;unipr…	transcription factor	95186	CSF1	protein	dip:DIP-41860N;ensembl:ENSG00000184371;ensembl:ENSP00000327513;ensembl:ENSP00000358816;ensembl:ENSP00000358817;ensembl:ENSP00000407317;ensembl:ENST00000329608;ensembl:ENST00000369801;ensembl:ENST00000369802;ensembl:ENST00000420111;entrez-gene:1435;hgnc-id:2432;hgnc-symbol:CSF1;hprd:00388;intact:EBI-2872294;pdb:1HMC;pdb:3UEZ;pdb:3UF2;pdb:4ADF;pdb:4FA8;pdb:4WRL;pdb:4WRM;pdb:5LXF;reactome:R-HSA-3814…	product	650929	gene regulatory interaction	Spike	15676205
4176580	AP-1_I.complex	protein		transcription factor	441476	NQO1	gene	ensembl:ENSG00000181019;ensembl:ENSP00000319788;ensembl:ENSP00000368335;entrez-gene:1728;hgnc-id:2874;hgnc-symbol:NQO1;hprd:00518;refseq:NC_000016;refseq:NM_000903;refseq:NM_001025433;refseq:NM_001025434;refseq:NM_001286137;refseq:NP_000894;refseq:NP_001020604;refseq:NP_001020605;refseq:NP_001273066;uniprot:P15559	transcribed gene	651747	gene regulatory interaction	Spike	8962164
236085	IL1A	gene	ensembl:ENSG00000115008;entrez-gene:3552;hgnc-id:5991;hprd:00988;intact:EBI-26484191;refseq:NM_000575;refseq:NP_000566;uniprot:P01583	transcribed gene	65540	IL1A	protein	dip:DIP-40550N;ensembl:ENSG00000115008;ensembl:ENSP00000263339;ensembl:ENST00000263339;entrez-gene:3552;hgnc-id:5991;hgnc-symbol:IL1A;hprd:00988;intact:EBI-1749782;intact:EBI-25426237;pdb:1ITA;pdb:2ILA;pdb:2KKI;pdb:2L5X;pdb:5UC6;reactome:R-HSA-2559582;reactome:R-HSA-445746;reactome:R-HSA-448706;reactome:R-HSA-449042;reactome:R-HSA-449054;reactome:R-HSA-449059;reactome:R-HSA-4568733;reactome:R-HSA…	product	32854;39086	gene regulatory interaction	BioCarta;PID	21151771
235895	IL1B	gene	ensembl:ENSG00000125538;ensembl:ENSP00000263341;entrez-gene:3553;hgnc-id:5992;hprd:00985;intact:EBI-26484208;refseq:NC_000002;refseq:NM_000576;refseq:NP_000567;refseq:XM_006712496;uniprot:P01584	transcribed gene	65539	IL1B	protein	dip:DIP-474N;ensembl:ENSG00000125538;ensembl:ENSP00000263341;ensembl:ENST00000263341;entrez-gene:3553;hgnc-id:5992;hgnc-symbol:IL1B;hprd:00985;intact:EBI-10051097;intact:EBI-1026290;pdb:1HIB;pdb:1I1B;pdb:1IOB;pdb:1ITB;pdb:1L2H;pdb:1S0L;pdb:1T4Q;pdb:1TOO;pdb:1TP0;pdb:1TWE;pdb:1TWM;pdb:21BI;pdb:2I1B;pdb:2KH2;pdb:2NVH;pdb:31BI;pdb:3LTQ;pdb:3O4O;pdb:3POK;pdb:41BI;pdb:4DEP;pdb:4G6J;pdb:4G6M;pdb:4GAF;p…	product	32685;35949;38998;639530;650723;652080;652201	gene regulatory interaction	BIND;BioCarta;PID;Spike	12610626;14764690;15546613;19651810;8021507;8386622;8413223
15482	SPI1 Gene	protein	dip:DIP-953N;ensembl:ENSG00000066336;ensembl:ENSP00000227163;ensembl:ENSP00000367799;ensembl:ENST00000227163;ensembl:ENST00000378538;entrez-gene:6688;hgnc-id:11241;hgnc-symbol:SPI1;hprd:01305;intact:EBI-2293548;reactome:R-HSA-8865489;reactome:R-HSA-8865503;reactome:R-HSA-8939236;reactome:R-HSA-9616222;refseq:NC_000011;refseq:NM_001080547;refseq:NM_003120;refseq:NP_001074016;refseq:NP_003111;unipr…	transcription factor	436787	CSF1	gene	ensembl:ENSG00000184371;ensembl:ENSP00000327513;ensembl:ENSP00000358817;entrez-gene:1435;hgnc-id:2432;hgnc-symbol:CSF1;hprd:00388;intact:EBI-26478827;refseq:NC_000001;refseq:NM_000757;refseq:NM_172210;refseq:NM_172211;refseq:NM_172212;refseq:NP_000748;refseq:NP_757349;refseq:NP_757350;refseq:NP_757351;uniprot:P09603	transcribed gene	650929	gene regulatory interaction	Spike	15676205
530284	KLF4	gene	ensembl:ENSG00000136826;entrez-gene:9314;intact:EBI-11177920;refseq:NP_004226;refseq:XP_005252362	transcribed gene	19009	KLF4	protein	dip:DIP-57667N;ensembl:ENSG00000136826;ensembl:ENSP00000363804;ensembl:ENST00000374672;ensembl:ENST00000374672.4;entrez-gene:9314;hgnc-id:6348;hgnc-symbol:KLF4;hprd:03769;intact:EBI-20740118;intact:EBI-7232405;intact:MINT-7261942;reactome:R-HSA-381340;reactome:R-HSA-422085;reactome:R-HSA-434463;reactome:R-HSA-452723;reactome:R-HSA-5660404;reactome:R-HSA-9617828;refseq:NM_001314052;refseq:NM_00423…	product	651135;651532;651764	gene regulatory interaction	Spike	17129668;18375530
4176476	NFkB.complex	protein		transcription factor	232598	TNF	gene	ensembl:ENSG00000204490;ensembl:ENSG00000206439;ensembl:ENSG00000223952;ensembl:ENSG00000228321;ensembl:ENSG00000228849;ensembl:ENSG00000230108;ensembl:ENSG00000232810;ensembl:ENSP00000398698;entrez-gene:7124;hgnc-id:11892;hgnc-symbol:TNF;hprd:01855;intact:EBI-26489272;refseq:NC_000006;refseq:NM_000594;refseq:NP_000585;uniprot:P01375	transcribed gene	652306	gene regulatory interaction	Spike	1715367;1916897;7608567
15482	SPI1 Gene	protein	dip:DIP-953N;ensembl:ENSG00000066336;ensembl:ENSP00000227163;ensembl:ENSP00000367799;ensembl:ENST00000227163;ensembl:ENST00000378538;entrez-gene:6688;hgnc-id:11241;hgnc-symbol:SPI1;hprd:01305;intact:EBI-2293548;reactome:R-HSA-8865489;reactome:R-HSA-8865503;reactome:R-HSA-8939236;reactome:R-HSA-9616222;refseq:NC_000011;refseq:NM_001080547;refseq:NM_003120;refseq:NP_001074016;refseq:NP_003111;unipr…	transcription factor	133810	CD68	protein	ensembl:ENSG00000129226;ensembl:ENSP00000250092;ensembl:ENSP00000369867;ensembl:ENST00000250092;ensembl:ENST00000380498;entrez-gene:968;hgnc-id:1693;hprd:01093;intact:EBI-2826276;reactome:R-HSA-6798695;reactome:R-HSA-6806033;reactome:R-HSA-6806163;refseq:NM_001040059;refseq:NM_001251;refseq:NP_001035148;refseq:NP_001242;uniprot:B4DVT4;uniprot:CD68_HUMAN;uniprot:P34810;uniprot:Q53HR6;uniprot:Q53XI…	product	652279	gene regulatory interaction	Spike	12676954
4176580	AP-1_I.complex	protein		transcription factor	235895	IL1B	gene	ensembl:ENSG00000125538;ensembl:ENSP00000263341;entrez-gene:3553;hgnc-id:5992;hprd:00985;intact:EBI-26484208;refseq:NC_000002;refseq:NM_000576;refseq:NP_000567;refseq:XM_006712496;uniprot:P01584	transcribed gene	652080	gene regulatory interaction	Spike	8386622
4176580	AP-1_I.complex	protein		repressor	4299397	SPARC	gene	entrez-gene:6678	transcribed gene	650727	gene regulatory interaction	Spike	10777211;11042689
51119	MMP2	protein	chembl:333;ensembl:ENSG00000087245;ensembl:ENSP00000219070;ensembl:ENSP00000394237;ensembl:ENSP00000444143;ensembl:ENSP00000461421;ensembl:ENST00000219070;ensembl:ENST00000437642;ensembl:ENST00000543485;ensembl:ENST00000570308;entrez-gene:4313;hgnc-id:7166;hgnc-symbol:MMP2;hprd:00386;humancyc:HS01565-MONOMER;humancyc:MONOMER-15872;intact:EBI-10039972;intact:EBI-1033518;pdb:1CK7;pdb:1CXW;pdb:1EAK;…	transcription factor	435080	CCL7	gene	ensembl:ENSG00000108688;ensembl:ENSP00000367832;entrez-gene:6354;hgnc-id:10634;hgnc-symbol:CCL7;hprd:01150;intact:EBI-26478626;refseq:NM_006273;refseq:NP_006264;uniprot:P80098	product	48586	gene regulatory interaction	InnateDB	10947989
4176580	AP-1_I.complex	protein		transcription factor	232598	TNF	gene	ensembl:ENSG00000204490;ensembl:ENSG00000206439;ensembl:ENSG00000223952;ensembl:ENSG00000228321;ensembl:ENSG00000228849;ensembl:ENSG00000230108;ensembl:ENSG00000232810;ensembl:ENSP00000398698;entrez-gene:7124;hgnc-id:11892;hgnc-symbol:TNF;hprd:01855;intact:EBI-26489272;refseq:NC_000006;refseq:NM_000594;refseq:NP_000585;uniprot:P01375	transcribed gene	651085	gene regulatory interaction	Spike	10954918;11991968
4176476	NFkB.complex	protein		transcription factor	54001	CXCL2	protein	dip:DIP-5908N;ensembl:ENSG00000081041;ensembl:ENSP00000427279;ensembl:ENST00000508487;entrez-gene:2920;hgnc-id:4603;hprd:00741;intact:EBI-2114901;pdb:1QNK;pdb:5OB5;reactome:R-HSA-373777;reactome:R-HSA-380108;reactome:R-HSA-418594;reactome:R-HSA-6783783;refseq:NM_002089;refseq:NP_002080;uniprot:CXCL2_HUMAN;uniprot:MIP2A_HUMAN;uniprot:P19875;uniprot:Q6FGD6;uniprot:Q9UPB8	product	651895	gene regulatory interaction	Spike	8576166
15482	SPI1 Gene	protein	dip:DIP-953N;ensembl:ENSG00000066336;ensembl:ENSP00000227163;ensembl:ENSP00000367799;ensembl:ENST00000227163;ensembl:ENST00000378538;entrez-gene:6688;hgnc-id:11241;hgnc-symbol:SPI1;hprd:01305;intact:EBI-2293548;reactome:R-HSA-8865489;reactome:R-HSA-8865503;reactome:R-HSA-8939236;reactome:R-HSA-9616222;refseq:NC_000011;refseq:NM_001080547;refseq:NM_003120;refseq:NP_001074016;refseq:NP_003111;unipr…	transcription factor	3445230	CSF2RA	gene	ensembl:ENSP00000347606;ensembl:ENSP00000348058;ensembl:ENSP00000370911;ensembl:ENSP00000370920;ensembl:ENSP00000370935;ensembl:ENSP00000370940;ensembl:ENSP00000394227;ensembl:ENSP00000416437;ensembl:ENSP00000440491;entrez-gene:1438;hgnc-id:2435;hprd:02381;refseq:NM_001161529;refseq:NM_001161530;refseq:NM_001161531;refseq:NM_001161532;refseq:NM_006140;refseq:NM_172245;refseq:NM_172246;refseq:NM_1…	transcribed gene	651069	gene regulatory interaction	Spike	7565736
19009	KLF4	protein	dip:DIP-57667N;ensembl:ENSG00000136826;ensembl:ENSP00000363804;ensembl:ENST00000374672;ensembl:ENST00000374672.4;entrez-gene:9314;hgnc-id:6348;hgnc-symbol:KLF4;hprd:03769;intact:EBI-20740118;intact:EBI-7232405;intact:MINT-7261942;reactome:R-HSA-381340;reactome:R-HSA-422085;reactome:R-HSA-434463;reactome:R-HSA-452723;reactome:R-HSA-5660404;reactome:R-HSA-9617828;refseq:NM_001314052;refseq:NM_00423…	transcription factor	438795	CCL13	gene	ensembl:ENSG00000181374;entrez-gene:6357;hgnc-symbol:CCL13;intact:EBI-26475337	transcribed gene	73406	gene regulatory interaction	IntAct	33179750
232598	TNF	gene	ensembl:ENSG00000204490;ensembl:ENSG00000206439;ensembl:ENSG00000223952;ensembl:ENSG00000228321;ensembl:ENSG00000228849;ensembl:ENSG00000230108;ensembl:ENSG00000232810;ensembl:ENSP00000398698;entrez-gene:7124;hgnc-id:11892;hgnc-symbol:TNF;hprd:01855;intact:EBI-26489272;refseq:NC_000006;refseq:NM_000594;refseq:NP_000585;uniprot:P01375	transcribed gene	23275	TNF	protein	chembl:1825;dip:DIP-2895N;ensembl:ENSG00000204490;ensembl:ENSG00000206439;ensembl:ENSG00000223952;ensembl:ENSG00000228321;ensembl:ENSG00000228849;ensembl:ENSG00000230108;ensembl:ENSG00000232810;ensembl:ENSP00000365290;ensembl:ENSP00000372988;ensembl:ENSP00000389490;ensembl:ENSP00000389492;ensembl:ENSP00000392858;ensembl:ENSP00000398698;ensembl:ENSP00000410668;ensembl:ENST00000376122;ensembl:ENST0…	product	32686;34240;34241;34808;35295;35854;35947;36976;38653;38781;38927;38997;39018;39084;54820;639814;651085;651491;652166;652306	gene regulatory interaction	BIND;BioCarta;InnateDB;PID;Spike	10954918;11741944;11991968;12560487;12610626;14764690;15546613;15657292;16199883;16210616;1715367;1916897;21084670;7608567;7982959;8376940;9742085
15482	SPI1 Gene	protein	dip:DIP-953N;ensembl:ENSG00000066336;ensembl:ENSP00000227163;ensembl:ENSP00000367799;ensembl:ENST00000227163;ensembl:ENST00000378538;entrez-gene:6688;hgnc-id:11241;hgnc-symbol:SPI1;hprd:01305;intact:EBI-2293548;reactome:R-HSA-8865489;reactome:R-HSA-8865503;reactome:R-HSA-8939236;reactome:R-HSA-9616222;refseq:NC_000011;refseq:NM_001080547;refseq:NM_003120;refseq:NP_001074016;refseq:NP_003111;unipr…	transcription factor	4114774	CSF2RB	gene	entrez-gene:1439	transcribed gene	651068	gene regulatory interaction	Spike	9808557
232859	STAT1-3 (dimer)	group		transcription factor	65539	IL1B	protein	dip:DIP-474N;ensembl:ENSG00000125538;ensembl:ENSP00000263341;ensembl:ENST00000263341;entrez-gene:3553;hgnc-id:5992;hgnc-symbol:IL1B;hprd:00985;intact:EBI-10051097;intact:EBI-1026290;pdb:1HIB;pdb:1I1B;pdb:1IOB;pdb:1ITB;pdb:1L2H;pdb:1S0L;pdb:1T4Q;pdb:1TOO;pdb:1TP0;pdb:1TWE;pdb:1TWM;pdb:21BI;pdb:2I1B;pdb:2KH2;pdb:2NVH;pdb:31BI;pdb:3LTQ;pdb:3O4O;pdb:3POK;pdb:41BI;pdb:4DEP;pdb:4G6J;pdb:4G6M;pdb:4GAF;p…	product	35949	gene regulatory interaction	PID	14764690
66429	CEBPD	protein	dip:DIP-146N;ensembl:ENSG00000221869;ensembl:ENSP00000386165;ensembl:ENST00000408965;entrez-gene:1052;hgnc-id:1835;hgnc-symbol:CEBPD;hprd:00297;intact:EBI-7962058;intact:MINT-6609320;reactome:R-HSA-381280;reactome:R-HSA-381340;reactome:R-HSA-6785807;reactome:R-HSA-9610379;refseq:NM_005195;refseq:NP_005186;uniprot:CEBPD_HUMAN;uniprot:P49716;uniprot:Q14937;uniprot:Q2M2X9	transcription factor	11985	HDAC4	protein	chembl:3524;dip:DIP-34565N;ensembl:ENSG00000068024;ensembl:ENSP00000264606;ensembl:ENST00000345617;entrez-gene:9759;hgnc-id:14063;hgnc-symbol:HDAC4;hprd:05610;humancyc:HS00927-MONOMER;intact:EBI-308629;pdb:2H8N;pdb:2O94;pdb:2VQJ;pdb:2VQM;pdb:2VQO;pdb:2VQQ;pdb:2VQV;pdb:2VQW;pdb:3UXG;pdb:3UZD;pdb:3V31;pdb:4CBT;pdb:4CBY;pdb:5A2S;pdb:5ZOO;pdb:5ZOP;pdb:6FYZ;reactome:R-HSA-2122947;reactome:R-HSA-264460…	transcription factor	55427	gene regulatory interaction	InnateDB	18820298
49696	BGN	protein	ensembl:ENSG00000182492;ensembl:ENSP00000327336;ensembl:ENST00000331595;entrez-gene:633;hgnc-id:1044;hgnc-symbol:BGN;hprd:02359;intact:EBI-762076;reactome:R-HSA-1971475;reactome:R-HSA-2022870;reactome:R-HSA-2022923;reactome:R-HSA-2024101;reactome:R-HSA-2063957;reactome:R-HSA-2063968;reactome:R-HSA-2064015;reactome:R-HSA-2064017;reactome:R-HSA-2064026;reactome:R-HSA-2064103;reactome:R-HSA-2064135;…	transcription factor	232598	TNF	gene	ensembl:ENSG00000204490;ensembl:ENSG00000206439;ensembl:ENSG00000223952;ensembl:ENSG00000228321;ensembl:ENSG00000228849;ensembl:ENSG00000230108;ensembl:ENSG00000232810;ensembl:ENSP00000398698;entrez-gene:7124;hgnc-id:11892;hgnc-symbol:TNF;hprd:01855;intact:EBI-26489272;refseq:NC_000006;refseq:NM_000594;refseq:NP_000585;uniprot:P01375	product	48976	gene regulatory interaction	InnateDB	12387878
4176476	NFkB.complex	protein		repressor	23275	TNF	protein	chembl:1825;dip:DIP-2895N;ensembl:ENSG00000204490;ensembl:ENSG00000206439;ensembl:ENSG00000223952;ensembl:ENSG00000228321;ensembl:ENSG00000228849;ensembl:ENSG00000230108;ensembl:ENSG00000232810;ensembl:ENSP00000365290;ensembl:ENSP00000372988;ensembl:ENSP00000389490;ensembl:ENSP00000389492;ensembl:ENSP00000392858;ensembl:ENSP00000398698;ensembl:ENSP00000410668;ensembl:ENST00000376122;ensembl:ENST0…	product	651491	gene regulatory interaction	Spike	9742085
4176476	NFkB.complex	protein		transcription factor	23275	TNF	protein	chembl:1825;dip:DIP-2895N;ensembl:ENSG00000204490;ensembl:ENSG00000206439;ensembl:ENSG00000223952;ensembl:ENSG00000228321;ensembl:ENSG00000228849;ensembl:ENSG00000230108;ensembl:ENSG00000232810;ensembl:ENSP00000365290;ensembl:ENSP00000372988;ensembl:ENSP00000389490;ensembl:ENSP00000389492;ensembl:ENSP00000392858;ensembl:ENSP00000398698;ensembl:ENSP00000410668;ensembl:ENST00000376122;ensembl:ENST0…	product	652306	gene regulatory interaction	Spike	1715367;1916897;7608567
4176476	NFkB.complex	protein		transcription factor	4213	PTGS2	protein	chembl:230;dip:DIP-28131N;ensembl:ENSG00000073756;ensembl:ENSP00000356438;ensembl:ENST00000367468;entrez-gene:5743;hgnc-id:9605;hgnc-symbol:PTGS2;hprd:02599;humancyc:HS01115-MONOMER;intact:EBI-21293019;intact:EBI-21293046;intact:EBI-5590949;intact:EBI-6662113;kegg:hsa:5743;pdb:1V0X;pdb:5F19;pdb:5F1A;pdb:5IKQ;pdb:5IKR;pdb:5IKT;pdb:5IKV;pdb:5KIR;reactome:R-HSA-197264;reactome:R-HSA-2142770;reactome…	product	651676	gene regulatory interaction	Spike	12529332;12860389;9414121
15482	SPI1 Gene	protein	dip:DIP-953N;ensembl:ENSG00000066336;ensembl:ENSP00000227163;ensembl:ENSP00000367799;ensembl:ENST00000227163;ensembl:ENST00000378538;entrez-gene:6688;hgnc-id:11241;hgnc-symbol:SPI1;hprd:01305;intact:EBI-2293548;reactome:R-HSA-8865489;reactome:R-HSA-8865503;reactome:R-HSA-8939236;reactome:R-HSA-9616222;refseq:NC_000011;refseq:NM_001080547;refseq:NM_003120;refseq:NP_001074016;refseq:NP_003111;unipr…	transcription factor	70774	MSR1	protein	ensembl:ENSG00000038945;ensembl:ENSP00000262100;ensembl:ENSP00000262101;ensembl:ENSP00000347430;ensembl:ENSP00000371428;ensembl:ENST00000262101;ensembl:ENST00000350896;ensembl:ENST00000355282;ensembl:ENST00000381998;entrez-gene:4481;hgnc-id:7376;hgnc-symbol:MSR1;hprd:01092;intact:EBI-1776976;reactome:R-HSA-2173717;reactome:R-HSA-2507846;reactome:R-HSA-3000480;refseq:NM_002445;refseq:NM_138715;ref…	product	652240	gene regulatory interaction	Spike	8007948
4176476	NFkB.complex	protein		repressor	232598	TNF	gene	ensembl:ENSG00000204490;ensembl:ENSG00000206439;ensembl:ENSG00000223952;ensembl:ENSG00000228321;ensembl:ENSG00000228849;ensembl:ENSG00000230108;ensembl:ENSG00000232810;ensembl:ENSP00000398698;entrez-gene:7124;hgnc-id:11892;hgnc-symbol:TNF;hprd:01855;intact:EBI-26489272;refseq:NC_000006;refseq:NM_000594;refseq:NP_000585;uniprot:P01375	transcribed gene	651491	gene regulatory interaction	Spike	9742085
4176580	AP-1_I.complex	protein		repressor	70939	SPARC	protein	dip:DIP-46426N;ensembl:ENSG00000113140;ensembl:ENSP00000231061;ensembl:ENST00000231061;entrez-gene:6678;hgnc-id:11219;hgnc-symbol:SPARC;hprd:01631;intact:EBI-2800983;pdb:1BMO;pdb:1NUB;pdb:1SRA;pdb:2V53;reactome:R-HSA-114608;reactome:R-HSA-114642;reactome:R-HSA-114643;reactome:R-HSA-1251985;reactome:R-HSA-2239456;reactome:R-HSA-3000178;reactome:R-HSA-3000497;reactome:R-HSA-8958057;refseq:NM_003118…	product	650727	gene regulatory interaction	Spike	10777211;11042689
246603	SLC11A1	gene	ensembl:ENSG00000018280;entrez-gene:6556;hgnc-symbol:SLC11A1;uniprot:P49279	transcribed gene	89040	SLC11A1	protein	entrez-gene:6556;reactome:R-HSA-437103;reactome:R-HSA-6803283;reactome:R-HSA-6803331;reactome:R-HSA-6803350;uniprot:C0H5Y3;uniprot:NRAM1_HUMAN;uniprot:P49279;uniprot:Q8IV72;uniprot:Q8IV72_HUMAN	product	33841;650953;651496	gene regulatory interaction	PID;Spike	15506972;18045875;18786141
17735	CEBPB	protein	dip:DIP-35345N;ensembl:ENSG00000172216;ensembl:ENSP00000305422;ensembl:ENST00000303004;entrez-gene:1051;hgnc-id:1834;hgnc-symbol:CEBPB;hprd:01801;intact:EBI-969696;pdb:1GTW;pdb:1GU4;pdb:1GU5;pdb:1H88;pdb:1H89;pdb:1H8A;pdb:1HJB;pdb:1IO4;pdb:2E42;pdb:2E43;pdb:6MG1;pdb:6MG2;pdb:6MG3;reactome:R-HSA-2559582;reactome:R-HSA-380994;reactome:R-HSA-381340;reactome:R-HSA-381378;reactome:R-HSA-3857339;reacto…	transcription factor	232598	TNF	gene	ensembl:ENSG00000204490;ensembl:ENSG00000206439;ensembl:ENSG00000223952;ensembl:ENSG00000228321;ensembl:ENSG00000228849;ensembl:ENSG00000230108;ensembl:ENSG00000232810;ensembl:ENSP00000398698;entrez-gene:7124;hgnc-id:11892;hgnc-symbol:TNF;hprd:01855;intact:EBI-26489272;refseq:NC_000006;refseq:NM_000594;refseq:NP_000585;uniprot:P01375	transcribed gene	51825	gene regulatory interaction	InnateDB	24012417
233423	TAp63g (tetramer)/SSRP1	complex		transcription factor	233428	CDKN1A	gene	ensembl:ENSG00000124762;ensembl:ENSP00000244741;ensembl:ENSP00000384849;ensembl:ENSP00000409259;ensembl:ENSP00000482768;entrez-gene:1026;hgnc-id:1784;hgnc-symbol:CDKN1A;hprd:00298;intact:EBI-1550784;refseq:NC_000006;refseq:NM_000389;refseq:NM_001220777;refseq:NM_001220778;refseq:NM_001291549;refseq:NM_078467;refseq:NP_000380;refseq:NP_001207706;refseq:NP_001207707;refseq:NP_001278478;refseq:NP_00…	transcribed gene	35970	gene regulatory interaction	PID	12374749;19898465;21335238
15482	SPI1 Gene	protein	dip:DIP-953N;ensembl:ENSG00000066336;ensembl:ENSP00000227163;ensembl:ENSP00000367799;ensembl:ENST00000227163;ensembl:ENST00000378538;entrez-gene:6688;hgnc-id:11241;hgnc-symbol:SPI1;hprd:01305;intact:EBI-2293548;reactome:R-HSA-8865489;reactome:R-HSA-8865503;reactome:R-HSA-8939236;reactome:R-HSA-9616222;refseq:NC_000011;refseq:NM_001080547;refseq:NM_003120;refseq:NP_001074016;refseq:NP_003111;unipr…	transcription factor	459530	ADGRE1	gene	ensembl:ENSG00000174837;entrez-gene:2015;hgnc-symbol:EMR1	product	55218	gene regulatory interaction	InnateDB	15533720
233423	TAp63g (tetramer)/SSRP1	complex		transcription factor	13423	CDKN1A	protein	dip:DIP-246N;ensembl:ENSG00000124762;ensembl:ENSP00000244741;ensembl:ENSP00000362815;ensembl:ENSP00000384849;ensembl:ENSP00000409259;ensembl:ENSP00000482768;ensembl:ENST00000244741;ensembl:ENST00000373711;ensembl:ENST00000405375;ensembl:ENST00000448526;ensembl:ENST00000615513;entrez-gene:1026;hgnc-id:1784;hgnc-symbol:CDKN1A;hprd:00298;intact:EBI-1550784;intact:EBI-1800051;intact:EBI-21019594;inta…	product	35970	gene regulatory interaction	PID	12374749;19898465;21335238
4300539	ITGAM	gene	entrez-gene:3684	transcribed gene	93421	ITGAM	protein	ensembl:ENSG00000169896;ensembl:ENSP00000441691;ensembl:ENSP00000496959;ensembl:ENST00000544665;ensembl:ENST00000648685;entrez-gene:3684;hgnc-id:6149;hgnc-symbol:ITGAM;hprd:00411;intact:EBI-2568251;pdb:1A8X;pdb:1BHO;pdb:1BHQ;pdb:1IDN;pdb:1IDO;pdb:1JLM;pdb:1M1U;pdb:1MF7;pdb:1N9Z;pdb:1NA5;pdb:2LKE;pdb:2LKJ;pdb:3Q3G;pdb:3QA3;pdb:4M76;pdb:4XW2;pdb:6RHW;reactome:R-HSA-166016;reactome:R-HSA-202733;reac…	product	650987;651387	gene regulatory interaction	Spike	15676205;19359519;8095266
232859	STAT1-3 (dimer)	group		transcription factor	235895	IL1B	gene	ensembl:ENSG00000125538;ensembl:ENSP00000263341;entrez-gene:3553;hgnc-id:5992;hprd:00985;intact:EBI-26484208;refseq:NC_000002;refseq:NM_000576;refseq:NP_000567;refseq:XM_006712496;uniprot:P01584	transcribed gene	35949	gene regulatory interaction	PID	14764690
235844	DUSP1	gene	ensembl:ENSG00000120129;entrez-gene:1843;hgnc-id:3064;hgnc-symbol:DUSP1;intact:EBI-6081112;refseq:NC_000005;uniprot:P28562	transcribed gene	142972	DUSP1	protein	ensembl:ENSG00000120129;ensembl:ENSP00000239223;ensembl:ENST00000239223;entrez-gene:1843;hgnc-id:3064;hgnc-symbol:DUSP1;hprd:02835;humancyc:HS04371-MONOMER;intact:EBI-975493;pdb:6APX;pdb:6D65;pdb:6D66;pdb:6D67;reactome:R-HSA-112409;reactome:R-HSA-203796;reactome:R-HSA-5675221;refseq:NC_000005;refseq:NM_004417;refseq:NP_004408;unigene:171695;uniprot:B4DU40;uniprot:D3DQL9;uniprot:DUS1_HUMAN;uniprot…	product	33377;36019;36404;36544;38269;117635;637930;651058;651465	gene regulatory interaction	BIND;BioCarta;IntAct;PID;Spike	12503606;12890671;14609431;15546613;17322878;17699753;18508759;19585511;20702711;22439931;8221888
11985	HDAC4	protein	chembl:3524;dip:DIP-34565N;ensembl:ENSG00000068024;ensembl:ENSP00000264606;ensembl:ENST00000345617;entrez-gene:9759;hgnc-id:14063;hgnc-symbol:HDAC4;hprd:05610;humancyc:HS00927-MONOMER;intact:EBI-308629;pdb:2H8N;pdb:2O94;pdb:2VQJ;pdb:2VQM;pdb:2VQO;pdb:2VQQ;pdb:2VQV;pdb:2VQW;pdb:3UXG;pdb:3UZD;pdb:3V31;pdb:4CBT;pdb:4CBY;pdb:5A2S;pdb:5ZOO;pdb:5ZOP;pdb:6FYZ;reactome:R-HSA-2122947;reactome:R-HSA-264460…	repressor	13423	CDKN1A	protein	dip:DIP-246N;ensembl:ENSG00000124762;ensembl:ENSP00000244741;ensembl:ENSP00000362815;ensembl:ENSP00000384849;ensembl:ENSP00000409259;ensembl:ENSP00000482768;ensembl:ENST00000244741;ensembl:ENST00000373711;ensembl:ENST00000405375;ensembl:ENST00000448526;ensembl:ENST00000615513;entrez-gene:1026;hgnc-id:1784;hgnc-symbol:CDKN1A;hprd:00298;intact:EBI-1550784;intact:EBI-1800051;intact:EBI-21019594;inta…	product	650959	gene regulatory interaction	Spike	18632985;18850004
4176580	AP-1_I.complex	protein		transcription factor	250359	IL18	gene	ensembl:ENSG00000150782;ensembl:ENSP00000280357;ensembl:ENSP00000434561;entrez-gene:3606;hgnc-id:5986;hprd:02976;intact:EBI-26483990;refseq:NM_001243211;refseq:NM_001562;refseq:NP_001230140;refseq:NP_001553;refseq:XM_011542805;refseq:XM_011542806;refseq:XP_011541107;refseq:XP_011541108;uniprot:Q14116	transcribed gene	650851	gene regulatory interaction	Spike	10975835
4176580	AP-1_I.complex	protein		transcription factor	443616	CXCL2	gene	ensembl:ENSG00000081041;entrez-gene:2920;hgnc-symbol:CXCL2;intact:EBI-10050550;refseq:NP_002080	transcribed gene	650681	gene regulatory interaction	Spike	14597166
17735	CEBPB	protein	dip:DIP-35345N;ensembl:ENSG00000172216;ensembl:ENSP00000305422;ensembl:ENST00000303004;entrez-gene:1051;hgnc-id:1834;hgnc-symbol:CEBPB;hprd:01801;intact:EBI-969696;pdb:1GTW;pdb:1GU4;pdb:1GU5;pdb:1H88;pdb:1H89;pdb:1H8A;pdb:1HJB;pdb:1IO4;pdb:2E42;pdb:2E43;pdb:6MG1;pdb:6MG2;pdb:6MG3;reactome:R-HSA-2559582;reactome:R-HSA-380994;reactome:R-HSA-381340;reactome:R-HSA-381378;reactome:R-HSA-3857339;reacto…	transcription factor	11985	HDAC4	protein	chembl:3524;dip:DIP-34565N;ensembl:ENSG00000068024;ensembl:ENSP00000264606;ensembl:ENST00000345617;entrez-gene:9759;hgnc-id:14063;hgnc-symbol:HDAC4;hprd:05610;humancyc:HS00927-MONOMER;intact:EBI-308629;pdb:2H8N;pdb:2O94;pdb:2VQJ;pdb:2VQM;pdb:2VQO;pdb:2VQQ;pdb:2VQV;pdb:2VQW;pdb:3UXG;pdb:3UZD;pdb:3V31;pdb:4CBT;pdb:4CBY;pdb:5A2S;pdb:5ZOO;pdb:5ZOP;pdb:6FYZ;reactome:R-HSA-2122947;reactome:R-HSA-264460…	transcription factor	58729	gene regulatory interaction	InnateDB	18820298
