# Supplementary material for: Senescence-associated lineage-aberrant plasticity evokes T-cell-mediated tumor control
Source: Nat Commun. 2025 Mar 31;16:3079. doi: 10.1038/s41467-025-57429-x (PMC11955568; doi:10.1038/s41467-025-57429-x)
Supplement: Supplementary file 4 — Supplementary Data 2 [file 41467_2025_57429_MOESM4_ESM.xlsx]

## Sheet: Data S2
Supplementary Data 2. Results of immune deconvolution, related to Fig. 2d and Supplementary Fig. 4j and 5g
See Methods section "Immune deconvolution" for further details.
Note that this file contains the following worksheets:
Worksheet	Description
A	Immune deconvolution of TIS model GEPs (GSE134753) by xCell
B	Immune deconvolution of TIS model GEPs (GSE134753) by quanTIseq
C	Immune deconvolution of TIS model GEPs (GSE134753) by CIBERSORT
D	Immune deconvolution of TIS GEPs by xCell analyzing effect of sh_Spi1
E	Immune deconvolution of TIS GEPs by quanTIseq analyzing effect of sh_Spi1
F	Immune deconvolution of TIS GEPs by CIBERSORTx analyzing effect of sh_Spi1
G	Immune deconvolution of DLBCL (-/+ ADR) GEPs by xCell
H	Immune deconvolution of DLBCL (-/+ ADR) GEPs by quanTIseq
I	Immune deconvolution of DLBCL (-/+ ADR) GEPs by CIBERSORT

## Sheet: S2A - TIS xCell
Supplementary Data 2A . Results of immune deconvolution of TIS model by xCell
Input: GSE134753 GEP data
GEPs of control;bcl2 (Suv39h1 WT) and Suv39h1-;bcl2 (Suv39h1-) mouse Eµ-myc lymphomas were immune deconvoluted by xCell. Scores of all differentiated myeloid cell types (highlighted in yellow) were summed up and represented by an "Aggregate myeloid score" as shown in Fig. 2d.
Sample_ID	Treatment	Genotype	Phenotype	Aggregate myeloid score	Myeloid dendritic cell activated	B cell	T cell CD4+ memory	T cell CD4+ naive	T cell CD4+ (non-regulatory)	T cell CD4+ central memory	T cell CD4+ effector memory	T cell CD8+ naive	T cell CD8+	T cell CD8+ central memory	T cell CD8+ effector memory	Class-switched memory B cell	Common lymphoid progenitor	Common myeloid progenitor	Myeloid dendritic cell	Endothelial cell	Eosinophil	Cancer associated fibroblast	Granulocyte-monocyte progenitor	Hematopoietic stem cell	Macrophage	Macrophage M1	Macrophage M2	Mast cell	B cell memory	Monocyte	B cell naive	Neutrophil	NK cell	T cell NK	Plasmacytoid dendritic cell	B cell plasma	T cell gamma delta	T cell CD4+ Th1	T cell CD4+ Th2	T cell regulatory (Tregs)	immune score	stroma score	microenvironment score
1467_native	native	Suv39h1 WT	non-senescent	0.0243153	0.0204648	0.0712413	0.00717459	0.0101005	0	0.0202647	0	0.00175897	7.62367e-19	0.00705388	0	0.0228386	0.00859776	0	0.0013683	0.00177402	2.22899e-18	2.41784e-18	0	0.00253687	0	0.00248222	0	0.0015409	0.01943	6.39706e-19	0.0148407	0	9.45052e-19	2.28375e-20	8.72741e-19	3.4156e-19	0	0.0344464	0.0206972	0.017396	0.0494336	0.000887008	0.0503206
1467_5d_ADR	5d ADR	Suv39h1 WT	senescent	0.035169	0.0137336	0.0684525	0.00444616	0.00590412	0	0.0134022	0.0116901	0.00126089	4.97715e-21	0.000261527	0	0.0228668	0.0127204	8.3943e-19	0.00132599	0.00126627	2.3062e-19	0.0208717	0	1.15244e-19	0.00819642	0.00720111	6.13472e-05	0.0114758	0.0188919	0	0.0142762	0	3.54289e-18	0.00171481	0.00465059	0.00271649	2.37763e-18	0.00855292	0.005995	0.0223467	0.0596338	0.011069	0.0707028
1570_native	native	Suv39h1 WT	non-senescent	0.00172289	0	0.0697372	0.00968491	0.00456906	3.0033e-19	0.00784805	0.00356428	0.0037873	0	0.0051366	0	0.0256075	0.010921	3.49919e-19	0.00069605	0.00168739	0	0.000402795	0.00744697	0.000451613	9.55275e-19	0	0	0.0054182	0.0167882	2.92311e-18	0.0124373	2.92825e-19	2.54311e-19	0.00455143	0.00102684	0.0165571	0	0.0068036	0.0769377	0.0191652	0.0505676	0.00104509	0.0516127
1570_5d_ADR	5d ADR	Suv39h1 WT	senescent	0.0288092	0.0174239	0.0890567	0.00425363	1.09072e-19	3.03336e-19	0.00551589	2.21299e-19	0.00154801	1.10417e-19	0.0101962	4.57208e-20	0.04621	0.0228191	0	0.00041676	0.00243935	0.000400505	0.0413558	0.00503188	0.012412	0.00504358	0.00376801	0.00215693	0.00604219	0.02102	2.24283e-18	0.00957195	3.53248e-20	0	0	2.56944e-20	0.0163069	0	0.0111614	4.03238e-18	0.0356631	0.0673065	0.0218976	0.089204
2581_native	native	Suv39h1 WT	non-senescent	0.000267331	0.0001634	0.0455838	0.000175808	0.00222018	2.95882e-18	0.00608965	6.10047e-20	0.0015958	3.74411e-19	0	0	0.00907184	0.0111522	7.38208e-20	0.000103931	0.00292843	0	0	0	0	0	2.3177e-19	1.79865e-20	0.0057537	0.0123391	0	0.00716397	5.39189e-19	6.09658e-19	0	0	0.00507698	6.92898e-18	0.0300825	0.0465921	0	0.0342943	0.00146422	0.0357585
2581_5d_ADR	5d ADR	Suv39h1 WT	senescent	0.0972706	0.0559794	0.041963	0.00187259	3.39706e-20	7.01015e-20	0.0218927	0.0019426	0	0	0.00691324	9.05251e-19	0.0106959	8.60629e-20	6.82878e-19	0.000634066	0.00157216	0	0.0566507	0	0.0296119	0.0116953	0.0121074	0.00831486	0.0074128	0.0105136	0.00643039	0.00932248	0.000824589	0	1.78719e-20	0.00128462	0.00979469	0	0.00755046	7.34624e-19	0.0113868	0.0459734	0.0291114	0.0750848
2949_native	native	Suv39h1 WT	non-senescent	0.00805056	0.00479304	0.0477398	0.00696006	0	0	0.0224482	2.15419e-18	0.00220419	5.27278e-19	0.0053474	0	0.0149747	0.0103395	6.80673e-21	0	0	1.11241e-19	4.39699e-19	5.56602e-18	0.00684665	0	0.00325752	9.79675e-22	0.00840159	0.0112293	0	0.00193464	0	5.52337e-20	0.000654672	3.45864e-19	0.0190576	1.36283e-18	0.00788904	0.0321408	0.0336277	0.0374276	2.19849e-19	0.0374276
2949_5d_ADR	5d ADR	Suv39h1 WT	senescent	0.00596802	0.00201003	0.0181442	0.000446982	0	1.90495e-21	0.00772567	0.0128066	0.000553094	4.44237e-18	0	2.2569e-18	0.00893763	0.0155901	7.67948e-19	0	0	0	0.0312181	0	0.0124917	0.000189337	0.00376866	8.40726e-19	0.0119497	0.00031615	6.44643e-18	0	1.51146e-19	0	0.0207304	7.53881e-19	0.0300972	1.88632e-18	0.00773981	3.59662e-18	0.0396639	0.0201889	0.0156169	0.0358058
3594_native	native	Suv39h1 WT	non-senescent	0.00554591	0	0.0475639	0.0032524	0.0053844	1.16243e-19	0.0115004	1.43685e-18	0.0108039	0.00150219	0.0049105	0	0.0167808	0.0142944	3.12757e-19	0.00196601	5.82493e-21	0	0.0282723	9.93651e-19	0	0	0.000429501	1.53009e-20	0.00406866	0.0162403	1.49336e-18	0.00125811	1.9818e-19	1.59698e-19	0.0160658	0.0031504	0.00942475	3.14958e-18	0.0238759	0.0422425	0.00559014	0.0367338	0.0141362	0.05087
3594_5d_ADR	5d ADR	Suv39h1 WT	senescent	0.0575493	0	0.014609	4.00802e-19	1.293e-18	0	0	0	9.58935e-19	0	2.65293e-18	5.74443e-19	0.00885329	0	1.11699e-18	0.000758098	0.000520188	2.68495e-20	0.0513057	4.25955e-19	0.00859045	0.0166745	0.0104275	0.013173	0.00350546	0.00492106	0.0136487	0.00228935	0.00286758	0	0.00278551	3.81723e-21	0.00432347	0	0.000781229	0.00191432	0	0.0347089	0.0259129	0.0606219
3769_native	native	Suv39h1 WT	non-senescent	0.00802919	0.00573252	0.0224162	0.00170918	0.0109311	6.80407e-19	0.00573445	0.00247011	0.00253944	0	0.000247954	1.15468e-18	0	0.0288951	0	0	0.000716869	0.00110307	0.000275859	0.00718892	0.00165533	0.000219816	0.00200658	7.02732e-05	0.00677659	0.00313288	1.4031e-18	8.00499e-06	4.04205e-19	3.97071e-18	7.35815e-19	0	0.0151919	8.74455e-18	0.0381778	0.0413329	0.015443	0.0203438	0.000496364	0.0208401
3769_5d_ADR	5d ADR	Suv39h1 WT	senescent	0.0845816	0.000155948	0.00678622	1.49078e-19	0	5.9426e-19	0	0.00860896	2.13401e-20	0	0	0	0.0059908	0	0	0	0.00331741	0	0.108566	7.75337e-19	0.0252754	0.0332081	0.0204287	0.0104039	0.00144135	6.30078e-20	0.0187853	0.00145262	0.00159971	0	3.43418e-20	0	0.00219559	6.31238e-20	0	1.65964e-18	0.0112983	0.0412138	0.0559416	0.0971554
403_native	native	Suv39h1 WT	non-senescent	0.0577203	0.020264	0.0337971	2.43372e-21	2.41833e-19	0	1.18507e-18	3.89239e-18	0.00237834	4.19429e-18	3.24565e-19	3.3458e-19	0.00944724	0.00439722	0	0.00215733	0	4.34492e-20	0.00490432	1.77157e-18	0.000345925	0.0118211	0.0143463	0	0.00808899	0.013978	0.00879809	0.00214707	9.49547e-05	0	0.0025729	0.000238501	0.00149175	6.06964e-18	0.00499056	0.0553051	5.1544e-18	0.0431717	0.00245216	0.0456239
403_5d_ADR	5d ADR	Suv39h1 WT	senescent	0.0452923	0	0	1.01184e-19	0	0	0	6.68215e-19	0	5.25825e-19	1.05347e-19	1.47791e-19	2.29679e-19	3.00154e-20	0	0	0	0	0.141025	0	0.0217542	0.0204264	0.0219705	0.00289541	0	5.60797e-19	0	0	1.25864e-19	0	1.47874e-19	1.57472e-18	1.52461e-14	0	1.26852e-18	0.00401083	0	0.0136176	0.0705123	0.0841299
5043_native	native	Suv39h1 WT	non-senescent	0.000818572	1.22638e-19	0.0445079	0.013465	0.00725557	0.00375305	0.019522	6.49557e-19	0.00129119	0	0.00666458	0	0.0134745	0.0228821	9.18671e-19	1.27242e-20	8.55016e-20	0	0.013765	2.12716e-18	0.00849783	0	0.000818572	0	0.00536083	0.00729275	0	3.53044e-19	0	6.25597e-21	0.000653672	0	0.00866958	2.4485e-18	0.0166373	0.0241132	0.0209178	0.0357478	0.0068825	0.0426303
5043_5d_ADR	5d ADR	Suv39h1 WT	senescent	0.0299489	0.00561877	0.0477994	0.00744554	2.83727e-20	1.73191e-05	0.00561809	0.0159254	0.00184082	0	0.00427794	1.90193e-19	0.0115572	0.0227162	0	3.7908e-21	0.000688896	1.17966e-19	0.0323143	0	0.00496372	0.0105698	0.00781329	8.06619e-05	0.00955179	0.0146	0.0031596	0.0024919	3.59684e-21	5.17928e-21	0.000988075	0.00270681	0.0124149	9.36341e-19	0.00357133	0.0112722	0.0339594	0.0473986	0.0165016	0.0639002
5560_native	native	Suv39h1 WT	non-senescent	0.0252797	0.00168051	0.0369657	0.00720159	0	6.85767e-19	0.00764957	0	0	2.07159e-18	0	0	0.00548336	0.0365365	9.92686e-19	1.859e-19	5.61864e-20	3.40102e-19	0.0111828	0	1.2513e-20	0.00983707	0.00771355	0.00255476	0.00564432	0.0105716	1.33335e-18	0	0	3.42178e-18	6.18047e-20	0.00349385	0.0104468	0	0.0139622	0.0255383	0.0241826	0.0349647	0.00675316	0.0417179
5560_5d_ADR	5d ADR	Suv39h1 WT	senescent	0.0576671	0	0	1.56412e-19	0	0	9.88408e-22	0	4.84701e-20	0	9.67529e-21	3.2199e-19	0	0	3.33066e-20	0	2.8949e-19	4.28823e-19	0.13758	0.000516786	0.0325836	0.0173354	0.0176306	0.00444265	5.91517e-20	1.61838e-18	0.0168278	0	0.00143067	2.38205e-19	0	0	1.45585e-19	5.0719e-19	4.19622e-19	6.71379e-22	0.00751071	0.0237292	0.0687898	0.0925191
5766_native	native	Suv39h1 WT	non-senescent	0.00153807	2.8647e-19	0.0555847	0.0205914	0.00102804	0.00607628	0.0173293	3.97497e-19	0.00184222	1.90757e-19	0.00972761	1.0836e-18	0.010581	0.027165	0	0	0	0	7.65362e-20	0	2.35807e-19	8.02624e-20	0.00153807	1.89287e-20	0.00849358	0.0123692	1.54455e-18	0	3.65163e-19	1.78853e-18	0.00126063	0	0.0146635	0	0.0105662	0.0432884	0.0360152	0.0467697	3.82681e-20	0.0467697
5766_5d_ADR	5d ADR	Suv39h1 WT	senescent	0.0348302	2.43515e-18	0.0190252	0.0144786	0	0.00860668	0.00992522	0.0320326	0.000272936	0	0.00808681	0	0.00227801	0.00467225	2.09696e-19	6.32603e-20	0.00451763	0.00144182	0.0691954	0	0.0281699	0.0111117	0.00866877	0.00129265	0.00996529	0.00156464	0.0125132	0.00067624	0.00124385	6.02526e-18	6.29669e-21	1.01422e-19	0.0160888	0	0.00152456	0	0.0346517	0.0426051	0.0368565	0.0794617
6054_native	native	Suv39h1 WT	non-senescent	0.0173188	5.82647e-19	0.0495815	0.0168908	0.0017293	0.00540832	0.0123796	1.66413e-19	0.00171353	0	0.00404666	1.03813e-19	0.0112686	0.0211173	2.75945e-19	8.8826e-22	0.00390338	0.00278083	0.0131972	0	0.0119509	0.00813244	0.00561654	0.000611546	0.00977056	0.0129446	0.00187955	0.000812689	4.8838e-20	9.9326e-21	0.00182982	0.00107875	0.00955594	0	0.00504007	0.0469776	0.0248958	0.0517021	0.00855031	0.0602524
6054_5d_ADR	5d ADR	Suv39h1 WT	senescent	0.0370373	0	0.0193318	0.00784243	0	0.00245721	0.00645179	0.0172335	2.37714e-20	2.09723e-18	0.00771671	3.07244e-18	2.5726e-19	0.00943899	2.39515e-19	0	0.00533602	0.00128016	0.0847255	0	0.0306477	0.0160749	0.00898227	0.00513612	0.0111777	0.00245766	0.00673034	3.16034e-06	0.00011366	6.94572e-18	6.16139e-21	0	0.0159362	4.61021e-19	0.00182962	0	0.0258632	0.0381105	0.0450307	0.0831413
7050_native	native	Suv39h1 WT	non-senescent	0.0403987	0.0238899	0.0400945	0.00579414	0	6.75143e-19	0.00493567	0	0.00380762	3.53352e-19	0	0	0.0111639	0.0129327	4.36724e-20	5.32007e-21	6.95642e-20	0	0.0225426	0	0	0.00654407	0.00839394	0	0.00752511	0.0102131	7.75391e-20	0.00274115	0.00102448	2.97541e-19	0.00424607	0.000546318	0.0066656	0	0.0158144	0.0527958	0.007572	0.0367921	0.0112713	0.0480634
7050_5d_ADR	5d ADR	Suv39h1 WT	senescent	0.0801914	0.00359825	0.010755	0.000828798	1.00829e-18	1.9664e-19	6.09724e-19	0.0341516	1.752e-19	1.25883e-18	0.00110249	0	0.000402321	0.00796106	0	3.25508e-19	0.00497527	0	0.0744073	0	0.00941706	0.0336877	0.0213013	0.00125271	0.00551927	0.00259303	0.0201753	0.000578798	0.000176069	9.40597e-19	2.81436e-18	0	0.00204593	0	0.000611219	0.00628288	0.00209415	0.0468756	0.0396913	0.0865669
9583_native	native	Suv39h1 WT	non-senescent	0.00277557	0	0.0513323	0.00575643	0.00386209	1.25184e-20	0.0133128	1.3527e-18	0.00265913	0	0.000473112	9.63961e-19	0.0204346	0.0123276	0	0.000332068	0.000490241	7.80451e-20	0.0079573	0.00202964	0.00397021	3.59032e-20	0.00190584	0.000537659	0.00469319	0.0133919	4.50182e-18	0.00500854	0	1.59236e-19	0.00134842	0	0.0105912	1.27259e-17	0.0183649	0.038178	0.0167685	0.0375717	0.00422377	0.0417955
9583_5d_ADR	5d ADR	Suv39h1 WT	senescent	0.0237098	0.00676426	0.0415892	0.00413168	3.18026e-19	5.50187e-20	0.0174114	0.00987092	0.000823415	1.28003e-18	0.00589619	2.66149e-19	0.0266863	0.00763463	1.74682e-19	0.000428725	0.000888814	0	0.0760401	0.00273388	0.0240108	0.00766741	0.00666852	0.00218091	0.00476123	0.011993	1.97741e-18	0.00407515	1.68198e-20	0	0.0068781	2.38045e-19	0.00786942	0	0.00523149	0	0.0241902	0.0362977	0.0384644	0.0747622
9584_native	native	Suv39h1 WT	non-senescent	0.0156915	0.00317953	0.031792	0.00467474	6.71563e-19	0	0.0171348	6.76319e-20	1.01327e-20	0	0	0	0.0187774	0.0113566	0	0.000236451	0.000780273	2.39125e-19	0.0184255	0.0101017	0.00185519	0.00278118	0.0059992	0.0020802	0.00658954	0.00782874	0.000323715	0	0.00109125	1.45773e-19	0.000222681	3.48802e-19	0.00862531	0	0.016945	0.0209681	0.0212779	0.0285428	0.00966073	0.0382035
9584_5d_ADR	5d ADR	Suv39h1 WT	senescent	0.136342	0.0834867	0.0426121	2.93457e-20	8.08752e-19	0	0.000759626	5.19906e-19	0.000424958	0	0.00051573	3.82679e-19	0.0125059	0.00290148	0	0.000783411	0	0.00272863	0.0234791	1.24992e-18	1.24789e-19	0.0188204	0.0223447	0.000193244	0.00373118	0.0129929	0.00837885	0.00336457	0	0	0	0.0023344	0.0111601	0	0.00412471	0.0208649	0.00836705	0.0513697	0.0124064	0.0637761
5783_native	native	Suv39h1-	non-senescent	0.019064	0.0106981	0.081734	0.0102508	2.0634e-20	0.0028272	0.0148982	4.48219e-19	0.00304172	5.02751e-19	0.00539851	0	0.0332096	0.0267444	2.81311e-19	1.2009e-19	0.0023201	0	0.00633047	0	0.00790477	5.72184e-20	0.00836591	1.21868e-18	0.0047081	0.0237401	2.69883e-18	0.0131945	1.58627e-19	0	0.00280379	6.68363e-19	0.0087543	0	0.0208691	0.0207883	0.0263981	0.0595129	0.00455548	0.0640684
5783_5d_ADR	5d ADR	Suv39h1-	non-senescent	0.0233091	0.000659253	0.0757789	0.0142838	0.0055271	0.014483	0.00872098	0	0.00047814	0	0.0112961	7.41357e-19	0.0200198	0.0363881	0	0	0.000722796	0.00360489	0.0546456	1.27928e-20	0.0148902	0.00962748	0.00552702	0.00425437	0.00683014	0.0212441	0.00324102	0.00818645	4.85273e-19	0	8.08537e-20	2.96891e-19	0.0131135	0	0.0027606	0.00387444	0.0490785	0.0757103	0.0276842	0.103395
7890_native	native	Suv39h1-	non-senescent	0.0552407	0.027567	0.0229997	0.0078233	2.24149e-20	6.19846e-19	5.13516e-19	2.90791e-18	5.86502e-21	5.73428e-19	9.39588e-19	0	0.00569027	0.0146567	0	0.000723356	2.52976e-05	6.76697e-19	0.00412557	0.0158652	0.000762504	0.0120778	0.00913124	0.00290278	0.00626591	0.00856529	0	2.17174e-21	1.98034e-20	3.05212e-19	0.00175251	0.00283855	0.0061491	6.62749e-18	0.0127201	0.0506613	1.14767e-18	0.0280445	0.00213488	0.0301793
7890_5d_ADR	5d ADR	Suv39h1-	non-senescent	0.0550948	0.020955	0.0340485	0.0071041	0.0051309	2.07541e-20	0.00443527	1.43138e-18	0.000448307	3.30609e-19	5.45223e-20	1.44907e-18	0.00685558	0.00680725	3.21232e-19	0.00108337	0.000613987	0	0.0147962	4.8992e-19	0.00137159	0.0161665	0.0124521	0.00124269	0.00868363	0.00839139	2.09346e-19	0.00464308	8.58082e-23	8.94746e-18	0.00216041	0.00319516	0.00268871	2.23375e-18	0.0172959	0.00985151	0	0.039988	0.00770508	0.0476931
9250_native	native	Suv39h1-	non-senescent	5.07584e-18	1.04362e-19	0.0222261	0.00468496	0	1.62274e-18	0.0162984	0.00768712	0.00173144	0	0.00571184	8.05775e-18	0.00870437	0.0077855	1.80576e-20	0	0	0	0	0.011583	0.0159338	1.06781e-18	0	1.34725e-19	0.00423051	0.00964578	1.86877e-18	0.00595395	4.86636e-20	6.39215e-19	0.00357523	1.8515e-18	0.00741401	9.96757e-19	0.00460702	0.0506669	0.000293468	0.0176378	0	0.0176378
9250_5d_ADR	5d ADR	Suv39h1-	non-senescent	0.0007575	0.0007575	0.0453037	0	0.00967922	3.85205e-19	0.00736222	3.8328e-18	0.00373729	8.6017e-19	6.4018e-20	0	0.0144545	0.0081134	1.05975e-18	0	0.00188033	0	0.0188015	0	0.0084249	0	0	0	0.00973314	0.0183891	0	0.00510941	3.42283e-19	0	0.00406862	1.38698e-18	0.00699938	2.51162e-18	0.0281516	0.00520923	0	0.0366912	0.0103409	0.0470322
1032_native	native	Suv39h1-	non-senescent	0.05222	0.0226362	0.0085557	0.0155922	0	0.00414898	0.0058347	0.0107094	0.00152205	8.62817e-19	0.0170604	1.07792e-18	0.000886094	0.0147869	0.00146318	0	0.00159936	0.00421013	0.0121598	0.0109146	0.0500655	0.0094033	0.0100722	0	0.0053008	7.95938e-19	0.00767833	3.83013e-18	0.00242994	9.81231e-19	0	2.33446e-20	0.00347671	0	0.00135348	0.0383092	0.0436205	0.0278181	0.00687959	0.0346977
1032_5d_ADR	5d ADR	Suv39h1-	non-senescent	0.110498	0.046207	0.00366088	0.00942415	2.02985e-19	0.00276633	0.00721191	0.0244896	0.00339557	0	0.0138568	1.03841e-19	3.2674e-19	0.0541713	1.82961e-18	0.0025327	0.00459464	0.00736491	0.105245	0	0.0357779	0.0208858	0.0117077	2.18489e-24	0.00328091	0.00243081	0.0267477	2.69067e-19	0.000375587	1.83833e-19	0.00367136	0.0020411	0.00334335	0.000345488	0.00353909	0.00372662	0.0250124	0.0450766	0.0549199	0.0999965
4936_native	native	Suv39h1-	non-senescent	2.98305e-18	2.96623e-19	0.0350206	0.00472176	0.0135042	1.03167e-20	0.00677733	8.57643e-19	0.0053584	1.79908e-18	0.00286341	0	0.0188486	0.0151469	0	2.50432e-19	0	1.65911e-18	0.000944494	7.57313e-19	0	1.06482e-18	9.1021e-19	4.60965e-19	0.00429814	0.00983509	0	0.0023781	0	0	5.4612e-19	0	0.00647487	3.07264e-19	0.0179385	0.00320396	0.0167752	0.0262125	0.000472247	0.0266848
4936_5d_ADR	5d ADR	Suv39h1-	non-senescent	1.4374e-18	0	0.0320466	0.00852066	0	0.00176384	0.0177931	0	0.00732094	0	0.00976856	0	0.0283277	0.00721398	0	4.91266e-20	1.05226e-20	5.53273e-19	8.48269e-19	6.41717e-19	0.0036464	5.03322e-20	0	1.45536e-19	0.00232304	0.00393415	0	0.000587783	1.1924e-18	0	0.00299374	0	0.0092202	3.9318e-18	0.031786	0.00883473	0.0415523	0.024089	4.29396e-19	0.024089
SuvER.4146_5d_ADR	5d ADR	Suv39h1- plus Suv39h1ER	non-senescent	0.0115827	0.00593294	0.0248143	0.0148574	0.00475612	0.00891801	0.00803778	0	0.00335556	0	0.0162693	0	0.00542364	0.0123033	0	0.00051694	0	0	0.0103528	0.00227889	0.0121861	0.00208119	0.00266244	0	0.00887575	0.0058641	0	0.00269428	7.65997e-21	2.54813e-18	0.00945982	0.000389154	0.0143943	3.98736e-18	0.0026946	0.0393088	0.0382142	0.0301375	0.00517639	0.0353139
SuvER.4146_native	native	Suv39h1- plus Suv39h1ER	non-senescent	0.000524262	8.68546e-19	0.0589324	0.00995503	0.00707965	1.71198e-21	0.0121069	0	0.00483364	6.35075e-19	0.00779647	0	0.0169647	0.0191009	9.50693e-20	5.55738e-05	9.42491e-06	0	0.00763707	0	0.00431953	0	0.000440676	2.80116e-05	0.00547221	0.0143923	9.57756e-20	0.00753338	0	3.00865e-19	0	1.34407e-18	0.00220317	1.16568e-18	0.0200396	0.0351285	0.0101913	0.0429734	0.00382325	0.0467967
SuvER.4936_5d_ADR	5d ADR	Suv39h1- plus Suv39h1ER	non-senescent	0.0228418	0.00177176	0.0491788	0.0122974	1.25984e-20	0.00227905	0.0029802	3.09885e-18	0.00397687	0	0.011273	1.72268e-18	0.0153829	0.0151874	0	0	0	0.0044768	0.013083	0.000557594	0.0242493	0.0104856	0.00564481	0.00354752	0.00299665	0.0169086	0.000756613	0.00756475	1.0807e-19	7.97445e-19	0.00283564	0.00063551	0.00985916	0	0.0074171	0.0206084	0.0507342	0.0467823	0.0065415	0.0533238
SuvER.4936_native	native	Suv39h1- plus Suv39h1ER	non-senescent	0.00037927	0	0.0279524	0.00166109	0.0137237	2.63848e-19	0.00638456	1.58498e-18	0.00432713	5.81284e-19	1.09037e-18	0	0.0199549	0.0118935	0	4.0923e-20	0	0	4.16301e-18	1.84037e-19	0	7.84722e-20	0.000138679	0.00024059	0.00844144	0.000299158	0	0	1.44374e-19	1.9359e-18	0	0	0.0103185	0	0.0245657	0.0187303	3.86058e-18	0.0242626	2.08151e-18	0.0242626
SuvER.5043_5d_ADR	5d ADR	Suv39h1- plus Suv39h1ER	non-senescent	0.00459711	7.57451e-19	0.0267067	0.0085261	0	1.05402e-19	0.0118695	0.00612959	0.00428213	0	0.00428756	9.54899e-19	0.00596839	0.0179799	3.95076e-19	0	0.00110032	0.00247325	1.11804e-18	0.0075253	0.0102548	0.00100171	0.00117243	1.31109e-19	0.00560442	0.00442109	6.35752e-19	0.00128359	0	2.51587e-18	0.00754609	0.00242298	0.0131001	2.26742e-18	0.0133563	0.0245499	0.0241443	0.0238574	0.000550161	0.0244075
SuvER.5043_native	native	Suv39h1- plus Suv39h1ER	non-senescent	0.00137937	0.000979598	0.0126526	0.00746249	0	1.58653e-19	0.0146371	4.36843e-19	0.00542352	2.59088e-18	0.00612094	0	0.000714026	0.00672573	0	0	1.62083e-20	0	0.00977624	2.8209e-18	0.00021706	3.28675e-19	0.00039977	0	0.00325721	0.00111533	0	1.39873e-20	1.48298e-19	2.29134e-19	0.000701157	0	0.00882104	1.83532e-17	0.0199385	0.0382298	0.0103117	0.0106066	0.00488812	0.0154947

## Sheet: S2B - TIS quanTIseq
Supplementary Data 2B . Results of immune deconvolution of TIS model by quanTIseq
Input: GSE134753 GEP data
GEPs of control;bcl2 (Suv39h1 WT) and Suv39h1-;bcl2 (Suv39h1-) mouse Eµ-myc lymphomas were immune deconvoluted by quanTIseq. Fractions of all differentiated myeloid cell types (highlighted in yellow) were summed up and represented by an "Aggregate myeloid score" as shown in Fig. 2d.
Sample_ID	Treatment	Genotype	Phenotype	Aggregate myeloid score	B cell	Macrophage M1	Macrophage M2	Monocyte	Neutrophil	NK cell	T cell CD4+ (non-regulatory)	T cell CD8+	T cell regulatory (Tregs)	Myeloid dendritic cell	uncharacterized cell
1467_native	native	Suv39h1 WT	non-senescent	0.463609	0.49818	0.012443	0.0196447	0	0	0.0382102	0	0	0	0.431522	1.11022e-16
1467_5d_ADR	5d ADR	Suv39h1 WT	senescent	0.36329	0.63671	0.0939286	0.00886578	0	0	0	0	0	0	0.260496	0
1570_native	native	Suv39h1 WT	non-senescent	0.368412	0.607163	0	0.0262443	0	0	0.000117358	0	0	0.0243075	0.342168	1.11022e-16
1570_5d_ADR	5d ADR	Suv39h1 WT	senescent	0.109222	0.890778	0.0526148	0.0317932	0	0	0	0	0	0	0.0248135	0
2581_native	native	Suv39h1 WT	non-senescent	0.191745	0.611276	0.0327253	0.0255471	0	0	0	0	0	0	0.133473	0.196979
2581_5d_ADR	5d ADR	Suv39h1 WT	senescent	0.365108	0.587349	0.179268	0.0543122	0.0137837	0	0	0	0	0.0108056	0.117744	0.0367366
2949_native	native	Suv39h1 WT	non-senescent	0.261016	0.469255	0.0836542	0.0328309	0	0	0	0	0	0.269729	0.144531	0
2949_5d_ADR	5d ADR	Suv39h1 WT	senescent	0.300362	0.390633	0.099417	0.0208202	0	0	0	0	0	0.196867	0.180124	0.112138
3594_native	native	Suv39h1 WT	non-senescent	0.199203	0.629002	0.0460031	0.0482693	0	0	0	0	0	0	0.10493	0.171795
3594_5d_ADR	5d ADR	Suv39h1 WT	senescent	0.6314	0.3686	0.310284	0	0	0	0	0	0	0	0.321116	0
3769_native	native	Suv39h1 WT	non-senescent	0.199523	0.509057	0.0364335	0.042576	0	0	0	0	0	0	0.120513	0.29142
3769_5d_ADR	5d ADR	Suv39h1 WT	senescent	0.679449	0.320551	0.424496	0	0	0	0	0	0	0	0.254952	0
403_native	native	Suv39h1 WT	non-senescent	0.292894	0.505853	0.0797604	0.021977	0.0509782	0	0	0	0	0	0.140178	0.201253
403_5d_ADR	5d ADR	Suv39h1 WT	senescent	0.8093	0.1907	0.700727	0	0	0	0	0	0	0	0.108573	2.22045e-16
5043_native	native	Suv39h1 WT	non-senescent	0.300509	0.582105	0	0.0426699	0	0	0.00199894	0	0	0.115387	0.257839	0
5043_5d_ADR	5d ADR	Suv39h1 WT	senescent	0.479944	0.520056	0.183104	0	0	0	0	0	0	0	0.29684	2.22045e-16
5560_native	native	Suv39h1 WT	non-senescent	0.416115	0.583885	0.0755569	0.021605	0	0	0	0	0	0	0.318953	0
5560_5d_ADR	5d ADR	Suv39h1 WT	senescent	0.865364	0.134636	0.568566	0	0.077701	0	0	0	0	0	0.219097	0
5766_native	native	Suv39h1 WT	non-senescent	0.268464	0.50768	0.0400049	0.0091701	0	0	0.00547073	0	0	0.218385	0.219289	0
5766_5d_ADR	5d ADR	Suv39h1 WT	senescent	0.56984	0.398982	0.242604	0	0	0	0	0	0	0.0311788	0.327235	0
6054_native	native	Suv39h1 WT	non-senescent	0.45482	0.501722	0.190283	0	0	0	0	0	0	0.0434575	0.264537	0
6054_5d_ADR	5d ADR	Suv39h1 WT	senescent	0.629541	0.370459	0.300221	0	0	0	0	0	0	0	0.32932	0
7050_native	native	Suv39h1 WT	non-senescent	0.387628	0.481872	0.0201555	0.0424267	0	0.00890267	0	0	0	0.0949876	0.316143	0.0355123
7050_5d_ADR	5d ADR	Suv39h1 WT	senescent	0.725004	0.274996	0.402009	0	0	0	0	0	0	0	0.322995	0
9583_native	native	Suv39h1 WT	non-senescent	0.278334	0.5132	0.0321196	0.0407605	0	0	0	0	0	0.0286183	0.205454	0.179847
9583_5d_ADR	5d ADR	Suv39h1 WT	senescent	0.330922	0.526876	0.0890019	0.041659	0	0	0	0	0	0.0432419	0.200261	0.0989598
9584_native	native	Suv39h1 WT	non-senescent	0.262175	0.451664	0.0371155	0.065745	0	5.66942e-05	0.011253	0	0	0.12319	0.159258	0.151718
9584_5d_ADR	5d ADR	Suv39h1 WT	senescent	0.473459	0.526541	0.272029	0	0	0	0	0	0	0	0.20143	2.22045e-16
5783_native	native	Suv39h1-	non-senescent	0.174406	0.649386	0.0371052	0.0363054	0.00364431	0	0	0	0	0.10149	0.097351	0.074718
5783_5d_ADR	5d ADR	Suv39h1-	non-senescent	0.303535	0.696465	0.15698	0.00218386	0	0	0	0	0	0	0.144371	0
7890_native	native	Suv39h1-	non-senescent	0.540018	0.459982	0.192086	0	0.0738216	0	0	0	0	0	0.27411	0
7890_5d_ADR	5d ADR	Suv39h1-	non-senescent	0.474113	0.525887	0.166799	0.0170566	0	0	0	0	0	0	0.290257	1.11022e-16
9250_native	native	Suv39h1-	non-senescent	0.33888	0.442161	0.0215773	0.0207543	0	0.00555148	0	0	0	0	0.290996	0.218959
9250_5d_ADR	5d ADR	Suv39h1-	non-senescent	0.189715	0.633764	0.0108456	0.0572266	0	0.00836539	0	0	0	0	0.113277	0.176521
1032_native	native	Suv39h1-	non-senescent	0.305916	0.197976	0.149865	0	0	0	0	0	0	0.496108	0.156051	4.44089e-16
1032_5d_ADR	5d ADR	Suv39h1-	non-senescent	0.578535	0.200554	0.385919	0	0	0	0	0	0	0.220911	0.192616	2.22045e-16
4936_native	native	Suv39h1-	non-senescent	0.30695	0.511442	0	0.0443744	0	0.000916959	0.0251157	0	0	0.0121313	0.261659	0.144361
4936_5d_ADR	5d ADR	Suv39h1-	non-senescent	0.392605	0.38828	0	0.0219461	0	0.0107793	0.0425677	0	0	0.0832124	0.35988	0.0933348
SuvER.4146_5d_ADR	5d ADR	Suv39h1- plus Suv39h1ER	non-senescent	0.409053	0.337093	0.0547268	0.0387007	0	0	0	0	0	0.135571	0.315625	0.118283
SuvER.4146_native	native	Suv39h1- plus Suv39h1ER	non-senescent	0.411627	0.494384	0.000712886	0.0268373	0	0.00257103	0.00262286	0	0	0.0323838	0.381506	0.0589816
SuvER.4936_5d_ADR	5d ADR	Suv39h1- plus Suv39h1ER	non-senescent	0.554726	0.445274	0.261079	0	0	0	0	0	0	0	0.293646	3.33067e-16
SuvER.4936_native	native	Suv39h1- plus Suv39h1ER	non-senescent	0.291401	0.41188	0.00568386	0.0160004	0	0.0142036	0.0220644	0	0	0.000284363	0.255513	0.274371
SuvER.5043_5d_ADR	5d ADR	Suv39h1- plus Suv39h1ER	non-senescent	0.385584	0.416339	0.053285	0.020113	0	0	0	0	0	0.0166303	0.312186	0.181447
SuvER.5043_native	native	Suv39h1- plus Suv39h1ER	non-senescent	0.226466	0.336143	0.0154865	0.0201448	0	0.0245225	0.0181577	0	0	0.0473921	0.166312	0.371841

## Sheet: S2C - TIS CIBERSORT
Supplementary Data 2C . Results of immune deconvolution of TIS model by CIBERSORT
Input: GSE134753 GEP data
GEPs of control;bcl2 (Suv39h1 WT) and Suv39h1-;bcl2 (Suv39h1-) mouse Eµ-myc lymphomas were immune deconvoluted by CIBERSORT. Fractions of all differentiated myeloid cell types (highlighted in yellow) were summed up and represented by an "Aggregate myeloid score" as shown in Fig. 2d
Sample_ID	Treatment	Genotype	Phenotype	Aggregate myeloid score	B.cells.naive	B.cells.memory	Plasma.cells	T.cells.CD8	T.cells.CD4.naive	T.cells.CD4.memory.resting	T.cells.CD4.memory.activated	T.cells.follicular.helper	T.cells.regulatory..Tregs.	T.cells.gamma.delta	NK.cells.resting	NK.cells.activated	Monocytes	Macrophages.M0	Macrophages.M1	Macrophages.M2	Dendritic.cells.resting	Dendritic.cells.activated	Mast.cells.resting	Mast.cells.activated	Eosinophils	Neutrophils
1467_native	native	Suv39h1 WT	non-senescent	0.0864342	0	0.536442	0	0	0.11949	0	0	0	0.0212876	0.0379356	0	0.0733312	0	0	0	0.000197428	0.0104677	0.0602369	0	0.051271	0.073808	0.0155322
1467_5d_ADR	5d ADR	Suv39h1 WT	senescent	0.0719452	0	0.391439	0.219122	0.017294	0.0276171	0	0	0.0092247	0	0	0	0.0153375	0.00426389	0	0	0.0304325	0.0176851	0.0195636	0	0.0937489	0.154271	0
1570_native	native	Suv39h1 WT	non-senescent	0.0309214	0	0.671521	0.019418	0	0.123566	0	0	0	0.00339789	0.0325913	0	0.0746003	0	0.00318446	0	0.0129059	0	0.00258373	0	0	0.0439842	0.0122473
1570_5d_ADR	5d ADR	Suv39h1 WT	senescent	0.0491173	0	0.582091	0.130306	0.0135589	0.0626237	0	0	0	0	0.0177681	0	0.0657681	0	0	0	0.0317676	0.00139819	0.0031492	0	0.0279213	0.0508458	0.0128024
2581_native	native	Suv39h1 WT	non-senescent	0.109728	0	0.434147	0.085634	0.0368112	0.00357416	0.0908059	0.00289798	0	0	0	0.0847706	0	0.0274671	0.00228381	0.0023989	0	0.0591085	0.0184701	0	0	0.151631	0
2581_5d_ADR	5d ADR	Suv39h1 WT	senescent	0.15639	0	0.410317	0.0621663	0.0165442	0.0538068	0	0	0	0.0281476	0	0	0.0695845	0.0105009	0	0.00268452	0	0.121492	0	0	0.0753748	0.127669	0.021713
2949_native	native	Suv39h1 WT	non-senescent	0.0736066	0	0.460593	0.00152502	0.00537419	0.0891161	0	0	0	0.0170238	0	0	0.153849	0.0162621	0.00785919	0.000123914	0	0.0493614	0	0	0.0556174	0.143295	0
2949_5d_ADR	5d ADR	Suv39h1 WT	senescent	0.10891	0	0.481627	0.01202	0.0437119	0	0.0225603	0	0.000413406	0	0	0	0.0488452	0.0153503	0	0	0	0.0902412	0.00331878	0	0.1047	0.177211	0
3594_native	native	Suv39h1 WT	non-senescent	0.128425	0	0.478402	0.176366	0.0465631	0.027105	0	0	0	0	0	0.00125751	0.00379099	0.0110773	0.0261941	0	0	0.0876697	0	0	0.0390107	0.0990794	0.00348394
3594_5d_ADR	5d ADR	Suv39h1 WT	senescent	0.481691	0	0.255772	0.052706	0.027679	0.00805946	0	0	0.00284545	0	0	0	0.000391242	0.00147252	0.0321301	0.00838097	0.0907884	0.348919	0	0	0.0734814	0.0973749	0
3769_native	native	Suv39h1 WT	non-senescent	0.132308	0	0.582344	0.0300465	0.0347274	0.064862	0.0140553	0	0	0	0	0.0020793	0.0174842	0.0181573	0.00559082	0	0	0.0809684	0.0275919	0	0.0381335	0.0839593	0
3769_5d_ADR	5d ADR	Suv39h1 WT	senescent	0.476477	0	0.208899	0.0297887	0.0211011	0	0.00472509	0	0.00349222	0	0	0.0103046	0	0.00605872	0.0551292	0	0	0.388209	0.0157725	0	0.119775	0.125437	0.0113071
403_native	native	Suv39h1 WT	non-senescent	0.32141	0	0.435496	0.0663931	0.0226597	0.0155368	0	0	0.00490389	0	0	0.0243445	0	0	0	0	0	0.17659	0.0973119	0	0.0611038	0.0481522	0.0475078
403_5d_ADR	5d ADR	Suv39h1 WT	senescent	0.235144	0	0.185032	0.189905	0.029605	0.0545222	0.0267347	0	0	0	0	0.00362229	0.00622392	0.00769771	0.0518901	0.00486425	0.00516513	0.123827	0.0196784	0	0.197079	0.0721312	0.0220209
5043_native	native	Suv39h1 WT	non-senescent	0.0384564	0	0.654954	0.0227734	0	0.0825956	0.0442555	0	0	0	0	0.0464354	0	0.0136444	0	0	0.0106125	0	0.0141995	0	0.0246678	0.0858622	0
5043_5d_ADR	5d ADR	Suv39h1 WT	senescent	0.113615	0	0.426759	0.00970363	0.0246693	0.0454539	0	0	0.00251925	0	0	0.0341177	0	0.00604996	0	0	0.0186141	0.0831276	0.00486769	0	0.0929891	0.250173	0.000955776
5560_native	native	Suv39h1 WT	non-senescent	0.193598	0	0.374026	0.111258	0.0283082	0.0939849	0	0.000866558	0	0	0	0.0337365	0	0.0105897	0	0	0.0114055	0.171603	0	0	0.0428148	0.121407	0
5560_5d_ADR	5d ADR	Suv39h1 WT	senescent	0.473172	0	0.188901	0.0222782	0.0427471	0	0	0	0.00290828	0	0	0.00449221	0.000529822	0.0103966	0.0895154	0.0330332	0	0.340227	0	0	0.131193	0.133778	0
5766_native	native	Suv39h1 WT	non-senescent	0.0952146	0	0.588191	0.0200769	0.00770271	0.0790138	0.00249742	0.013255	0	0	0	0.0667765	0	0.0155991	0	0	0.0175428	0.0583561	0.00371651	0	0.0240787	0.103193	0
5766_5d_ADR	5d ADR	Suv39h1 WT	senescent	0.126349	0	0.409349	0.0173636	0.0252656	0.0252273	0.0378698	0	0	0	0	0	0.044014	0.014868	0.012734	0	0.00272943	0.096018	0	0	0.0895136	0.225048	0
6054_native	native	Suv39h1 WT	non-senescent	0.0687212	0	0.510823	0.00364365	0.0159764	0.0751616	0	0	0	0	0	0.0323532	0	0.00632234	0.0211756	0	0.0284654	0.00495719	0.00780068	0	0.135515	0.157806	0
6054_5d_ADR	5d ADR	Suv39h1 WT	senescent	0.124198	0	0.395356	0.0183568	0.00938608	0.00179539	0.0326094	0	0.0037734	0	0	0	0.0512442	0.00723458	0.00292807	0	0.0547938	0.0592413	0	0	0.147119	0.216163	0
7050_native	native	Suv39h1 WT	non-senescent	0.102366	0	0.553984	0.0145847	0.0469651	0.0246539	0	0	0	0	0	0	0.0321627	0.0115475	0	0	0.0350513	0.0266705	0.0127979	0	0.0281732	0.197111	0.0162984
7050_5d_ADR	5d ADR	Suv39h1 WT	senescent	0.435689	0	0.229459	0.00515314	0.0112005	0.0426425	0.00136542	0	0	0	0	0	0.00527969	0.00329137	0	0.000788327	0.0211799	0.38811	0	0	0.079433	0.189778	0.0223193
9583_native	native	Suv39h1 WT	non-senescent	0.0354555	0	0.613349	0.0435794	0.00270872	0.169325	0	0.0132798	0	0.00329573	0.0320334	0	0.00313209	0.0100874	0	0	0.00931423	0.0141685	0.00188534	0	0.0130619	0.0707801	0
9583_5d_ADR	5d ADR	Suv39h1 WT	senescent	0.0736387	0	0.543554	0.0863525	0.0120551	0.0582567	0	0	0.017594	0	0.014215	0	0.0375968	0.0026409	0	7.22659e-05	0	0.064295	0.00663053	0	0.0708736	0.0858641	0
9584_native	native	Suv39h1 WT	non-senescent	0.113816	0	0.597137	0.0584481	0.0466213	0.0238789	0.00348366	0	0	0	0	0	0.0191099	0.0140185	0	0	0.0447361	0.0254652	0.0135966	0	0.0270352	0.11047	0.016
9584_5d_ADR	5d ADR	Suv39h1 WT	senescent	0.283227	0	0.342205	0.0612694	0.0256338	0.0404958	0	0	0	0	0	0.0203186	0	0.0100709	0	0.00700316	0.0393229	0.22683	0	0	0.0817372	0.145113	0
5783_native	native	Suv39h1-	non-senescent	0.0856965	0	0.558933	0.0627737	0.0102591	0.0721876	0	0	0	0.0151304	0.020995	0	0.0637828	0	0	0.0013026	0.00312196	0.0708174	0.000545623	0	0.00525619	0.104985	0.00990892
5783_5d_ADR	5d ADR	Suv39h1-	non-senescent	0.103886	0	0.41123	0.153224	0.000809092	0.069429	0.00108945	0	0	0	0	0.00229145	0.00693206	0.00962648	0	0	0	0.0942593	0	0	0.0930871	0.158022	0
7890_native	native	Suv39h1-	non-senescent	0.278071	0	0.354272	0.0496968	0.0888103	0.00838361	0	0.0295735	0	0	0	0.111667	0	0.0185922	0	0	0.0450309	0.214448	0	0	0.00881824	0.0707072	0
7890_5d_ADR	5d ADR	Suv39h1-	non-senescent	0.341081	0	0.446033	0	0.0366057	0.0104431	0	0.0131789	0	0	0	0.0702056	0	0.0144162	0	0.00247556	0.061642	0.262547	0	0	0	0.0824529	0
9250_native	native	Suv39h1-	non-senescent	0.0202212	0	0.588382	0.163563	0	0.0763288	0	0.0188687	0.00373897	0	0.00645353	0.091539	0	0	0.00131555	0	0.00535228	0.0108835	0.00266987	0	0.0202103	0.0106941	0
9250_5d_ADR	5d ADR	Suv39h1-	non-senescent	0.0748462	0	0.40766	0.126446	0.00972522	0.097963	0	0.0648157	0	0	0.00581258	0.153909	0	0	0.0120407	0	0.0227967	0.02921	0.0107989	0.0312285	0	0.0275938	0
1032_native	native	Suv39h1-	non-senescent	0.14788	0	0.207973	0	0.0212963	0	0.0206504	0	0.00366403	0	0	0	0.0263555	0.00962366	0	0	0.00273596	0.100973	0.0345472	0	0.160634	0.411548	0
1032_5d_ADR	5d ADR	Suv39h1-	non-senescent	0.1561	0	0.209274	0.00786669	0.0024425	0	0.0285721	0	0.00900442	0	0	0	0.0331565	0.00326208	0	0	0.0308635	0.0632995	0.0399504	0	0.282486	0.271099	0.0187242
4936_native	native	Suv39h1-	non-senescent	0.0745368	0	0.386308	0.190257	0.0369089	0.145232	0	0	0	0.0156849	0	0	0.0903226	0	0.00240997	0	0.0321858	0	0.0153948	0	0	0.0607493	0.0245462
4936_5d_ADR	5d ADR	Suv39h1-	non-senescent	0.0690591	0	0.410251	0.140326	0.0060709	0.130485	0	0	0	0.0790165	0.00532423	0	0.10901	0	0.0160763	0	0.0209248	0	0.0172125	0	0	0.0504574	0.0148455
SuvER.4146_5d_ADR	5d ADR	Suv39h1- plus Suv39h1ER	non-senescent	0.0833686	0	0.512548	0.0159417	0.0309172	0.00577601	0	0	0.00948411	0	0	0	0.0395346	0.0086622	0	0	0	0.0473634	0.0273431	0	0.134068	0.168362	0
SuvER.4146_native	native	Suv39h1- plus Suv39h1ER	non-senescent	0.0599268	0	0.642648	0	0	0.0719374	0	0.00851337	0	0.0160127	0.0261749	0	0.0909408	0	0.0175021	0	0.00351821	0.0201084	0	0	0.000296041	0.0835504	0.018798
SuvER.4936_5d_ADR	5d ADR	Suv39h1- plus Suv39h1ER	non-senescent	0.121564	0	0.530022	0.0129211	0.0219356	0	0	0	0.0248316	0	0	0.00323867	0	0	0.00783625	0	0.0271031	0.066775	0.0143699	0	0.159972	0.125515	0.00547955
SuvER.4936_native	native	Suv39h1- plus Suv39h1ER	non-senescent	0.0929136	0.0544549	0.493941	0	0.00290038	0.102638	0.0231509	0	0.0289671	0	0	0	0.120754	0.0513328	0.000809694	0	0.00514871	0.0108707	0.0247517	0	0	0.0802797	0
SuvER.5043_5d_ADR	5d ADR	Suv39h1- plus Suv39h1ER	non-senescent	0.118667	0	0.375377	0	0.0111897	0.0381848	0.0407851	0	0	0	0	0	0.0489903	0.0287246	0	0	0	0.0790751	0.0108673	0	0.0984028	0.268403	0
SuvER.5043_native	native	Suv39h1- plus Suv39h1ER	non-senescent	0.111128	0	0.424846	0	0.00560063	0.0676848	0.066956	0.0255201	0	0	0	0.0150028	0.0069834	0.0378584	0.0103547	0	0	0.031377	0.0315382	0	0	0.276278	0

## Sheet: S2D - sh_Spi1 xCell
Supplementary Data 2D . Results of immune deconvolution of TIS (+sh_Spi1) by xCell
Input: RNA-seq GEP data generated during present study
GEPs of control;bcl2 mouse Eµ-myc lymphomas, carrying either an sh_Ctrl or sh_Spi1 construct, were immune deconvoluted by xCell. Scores of all differentiated myeloid cell types (highlighted in yellow) were summed up and represented by an "Aggregate myeloid score" as shown in Supplementary Fig. 4j
Sample_ID	treatment	sh_TF	Genotype	Phenotype	Aggregate myeloid score	Myeloid dendritic cell activated	B cell	T cell CD4+ memory	T cell CD4+ naive	T cell CD4+ (non-regulatory)	T cell CD4+ central memory	T cell CD4+ effector memory	T cell CD8+ naive	T cell CD8+	T cell CD8+ central memory	T cell CD8+ effector memory	Class-switched memory B cell	Common lymphoid progenitor	Common myeloid progenitor	Myeloid dendritic cell	Endothelial cell	Eosinophil	Cancer associated fibroblast	Granulocyte-monocyte progenitor	Hematopoietic stem cell	Macrophage	Macrophage M1	Macrophage M2	Mast cell	B cell memory	Monocyte	B cell naive	Neutrophil	NK cell	T cell NK	Plasmacytoid dendritic cell	B cell plasma	T cell gamma delta	T cell CD4+ Th1	T cell CD4+ Th2	T cell regulatory (Tregs)	immune score	stroma score	microenvironment score
6614_UT_sh_Ctrl	UT	Ctrl	Suv39h1 WT	non-senescent	0.0123979	3.22e-18	0.0230295	1.38e-18	5.55e-20	1.2e-17	2.02e-18	1.58e-18	0	0	2.55e-17	0	0.0544767	0.0784873	0	0	3.21e-19	1.63e-18	3.66e-18	0.0070401	0.0370007	0	4.34e-19	2.31e-19	0	0.0218214	6.72e-18	0	3.8e-20	2.86e-19	0.130474	0.0123979	0.0276513	0	0.0623858	0.102559	4.47e-18	0.015353	1.99e-18	0.015353
6614_UT_sh_Spi1	UT	Spi1	Suv39h1 WT	non-senescent	0.0116395	0	0.0271202	5.04e-19	1.9e-18	2.92e-18	7.05e-18	0.00808597	0.0181415	0	9.13e-18	0	0.0330328	0.0679521	0	0	0	0.0025739	0	0.000337997	0.0137531	1.31e-18	0	8.24e-21	0.00445125	0.0164098	6.04e-19	0.00459149	8.88e-22	3.12e-18	0.10037	0.0116395	0.0247252	0	0.119542	0.0204929	0	0.0227636	2.21e-19	0.0227636
6614_ADR_sh_Ctrl	ADR	Ctrl	Suv39h1 WT	senescent	0.0458962	0	0.0765313	8.17e-19	1.01e-19	0	1.62e-17	0	6.31e-19	0	0	0	0.0372621	0.0569999	0	0.0031318	0.00146136	0.00282381	0.00242896	0.0165505	7.34e-19	0	0	0.0136174	0.000659076	0.0539368	1.9e-18	0.00743965	0.00213677	1.07e-17	0.0796029	0.0270102	0.0624016	3.71e-18	0.0755614	0.0524247	0.0242924	0.0568552	0.00194516	0.0588003
6614_ADR_sh_Spi1	ADR	Spi1	Suv39h1 WT	senescent	0.0313927	0	0.0488933	0.00223534	0.002859	1.71e-18	8.68e-18	1.13e-17	0.032571	3.56e-19	0	1.56e-17	0.0749531	0.079661	0	3.18e-19	0.00176909	0.00408964	0	0	0.00462713	4.39e-19	1.66e-20	0.0109544	0.00171131	0.0154581	2.99e-18	0.000694029	0.000291772	0	0.0463612	0.0201465	0.0481773	0	0.0839325	0.00886372	2e-19	0.0366573	0.000884543	0.0375419
2801_UT_sh_Ctrl	UT	Ctrl	Suv39h1 WT	non-senescent	0.0206394	1.05e-19	0.100607	9.03e-21	0	0	4.72e-18	0	0.00166794	1.95e-18	0	0	0.0537705	0.048674	0	0	0.00256927	7.33e-05	0.0116171	7e-18	0.0512834	0	0.00124136	0	0.00447797	0.0500391	1.14e-18	0.00510218	1.72e-19	7.34e-20	0.0490891	0.0193981	0.0222633	0	0.0461358	0.0422936	5.28e-19	0.0701056	0.00709319	0.0771988
2801_UT_sh_Spi1	UT	Spi1	Suv39h1 WT	non-senescent	9.3007e-18	1.82e-19	0.0389495	0	1.47e-18	1.69e-18	0	5.87e-19	0.0172487	3.78e-18	9.73e-18	1.34e-17	0.00752442	0.0179565	4.86e-19	0	8.32e-20	0	1.49e-17	4.89e-18	0.0331017	1.75e-18	0	6.87e-20	0.0102385	0.0148002	7.3e-18	0.00620566	0	1.51e-17	0.0409501	0	0.0155449	7.56e-18	0.0451778	0.0680922	0	0.032792	7.61e-18	0.032792
2801_ADR_sh_Ctrl	ADR	Ctrl	Suv39h1 WT	senescent	0.0884804	0.0539715	0.112857	0	0	0	0	0	0	0	0	0	0.102443	0.0333988	0	0.00270828	0.00640861	0	0.0152294	0	0.0816409	0.000544969	0.00741956	0.0100441	0	0.0531647	2.08e-18	0.0181421	4.79e-20	0	1.42e-19	0.013792	0.0169521	6.02e-18	0.0214804	0.00321343	0.00915282	0.0774069	0.010819	0.0882258
2801_ADR_sh_Spi1	ADR	Spi1	Suv39h1 WT	senescent	0.020032	0	0.0843382	5.11e-19	0.000201768	0.00237209	0.00187817	8.28e-18	0	5.16e-19	1.01e-19	0	0.0819762	0.032302	0	0	0.0023078	0	0.0284813	0.0216389	0.0327855	0.00247122	0.000590593	0.00494008	0.000522512	0.044942	1.06e-18	0.0103146	3.74e-20	4.67e-19	0.0283493	0.0120301	0.022619	4.34e-18	0.0240284	0.0170498	0	0.0598027	0.0153946	0.0751973
6054_UT_sh_Ctrl	UT	Ctrl	Suv39h1 WT	non-senescent	0.00641525	8.89e-19	0.0964936	0	9.44e-20	4.51e-18	2.85e-18	0	1.19e-20	0	4.38e-18	0	0.0367613	0.00686091	0	0	2.34e-21	6.49e-18	0	0	0.0460449	6.81e-19	0	0.00641524	0.00516815	0.0660546	1.12e-17	0.0314857	0	4.56e-19	0.0139728	1.22e-18	5.01e-19	0	1.98e-18	0.0502944	0	0.0677745	8.1e-20	0.0677745
6054_UT_sh_Spi1	UT	Spi1	Suv39h1 WT	non-senescent	0.00567542	0	0.0632881	2.88e-20	0	0	2.5e-19	8.8e-19	0.00202191	4.2e-18	0	0	0.0558988	4.42e-20	0	0	2.86e-05	0	0.00533167	0	0.0419714	0	0	0.00354056	0.00201313	0.0333058	2.73e-18	0.0271775	0	0	0.058868	0.00213486	0.0161656	0	0	0.0841365	6.16e-19	0.0435341	0.00268011	0.0462143
6054_ADR_sh_Ctrl	ADR	Ctrl	Suv39h1 WT	senescent	0.0172914	0	0.150604	0	5.49e-19	0	4.28e-19	1.89e-18	0	0	6.87e-18	0	0.0791913	3.04e-18	0	0	0.00218241	1.31e-18	0.0549917	0	0.0630752	0	9.68e-20	0.0172914	0.0213436	0.076502	0	0.049056	2.84e-19	1.25e-18	0.0270964	2.56e-18	0	0	0.0177978	8.51e-18	0	0.114632	0.0286459	0.143278
6054_ADR_sh_Spi1	ADR	Spi1	Suv39h1 WT	senescent	0.00624029	3.81e-19	0.0743254	3.22e-20	0	6.08e-19	0.00314277	2.92e-18	0	3.34e-19	0	0	0.0954775	4.38e-19	0	3.05e-19	0.00227137	6.54e-19	0.0269663	0	0.056781	2.75e-19	9.03e-20	0.00624029	0.0107795	0.0296186	9.64e-18	0.0348145	0	0	0.0207432	0	0.00945499	0	0	3.98e-18	0	0.0567366	0.0152025	0.0719391
9458_UT_sh_Ctrl	UT	Ctrl	Suv39h1 WT	non-senescent	1.5461e-18	0	0.00515633	0	0	2.81e-18	1.14e-18	0	0	0	0	0	0.00925665	0.00534059	2.07e-18	0	0	2.13e-18	0	0.0217339	0.108223	1.44e-18	0	6.54e-20	0.000261032	0	0	0.00950345	4.07e-20	8.48e-18	0.0226878	0	0.00910623	0	0	0.0885558	0	0.00361157	0	0.00361157
9458_UT_sh_Spi1	UT	Spi1	Suv39h1 WT	non-senescent	0.00154703	0.00154703	0.0218467	0	7.24e-19	1.32e-17	0	1.6e-18	2.28e-20	0	0	0	0.0501001	0.00653115	5.99e-19	0	0.00124552	1.57e-19	0.00800446	0.0438212	0.0997562	1.48e-18	1.01e-19	1.73e-19	0.00467292	0	0	0.00655958	7.95e-21	1.11e-18	1.13e-19	0	0.0119645	1e-17	0.000234121	0.0933516	0	0.0176798	0.00503766	0.0227174
9458_ADR_sh_Ctrl	ADR	Ctrl	Suv39h1 WT	senescent	0.0255637	0	0.00754169	1.94e-19	3.4e-18	1.35e-17	3.68e-19	2.73e-18	1.49e-18	2.43e-18	0	3.6e-18	0.0468098	0.00435806	1.04e-18	5.55e-19	0.00160542	0	0.00330351	0.0186466	0.079561	0	0.000406041	0.00652118	0.0041706	0.020841	0	0.00156365	0.00038975	2.44e-17	0.0386689	0.0182467	0.0133725	0	0	0.0330064	3.6e-18	0.00806802	0.00245446	0.0105225
9458_ADR_sh_Spi1	ADR	Spi1	Suv39h1 WT	senescent	0.0124519	2.49e-19	0.00711332	2.33e-20	3.35e-19	0	1.94e-19	1.13e-17	1.81e-18	1.33e-18	0	0	0.0648327	0.00816045	2.06e-18	0	9.99e-06	8.82e-18	0.0285264	0	1.38e-18	0	1.34e-18	0.0124519	0.000443873	1.33e-19	3.34e-17	0.00195548	8.49e-20	3.91e-19	0	0	0.00668914	3.39e-18	0.00828096	4.74e-19	2.73e-18	0.00503813	0.0142682	0.0193063
7069_UT_sh_Ctrl	UT	Ctrl	Suv39h1 WT	non-senescent	0.0159017	3.12e-19	0.081129	0	7.95e-18	9.73e-19	0	4.35e-17	0.0142238	3.79e-18	0	6.64e-18	0.0240646	0.0176664	1.43e-18	0	4.9e-19	2.06e-18	0.00201299	0	0.0593839	6.98e-20	0.00150449	0.00374131	0.0082057	0.0569447	0	0.00293401	0	2.91e-17	4.24e-19	0.0106559	0.00916914	2.21e-17	0.0541594	0.117568	0	0.0595564	0.0010065	0.0605629
7069_ADR_sh_Ctrl	ADR	Ctrl	Suv39h1 WT	senescent	0.023563	0	0.0687695	0	0	0	1.22e-17	0	0.00419134	0	0	0	0.0314365	0.029589	0	0	0	0	4.31e-19	8.92e-18	0.00302183	0	7.58e-20	0.0141907	0.00208616	0.0332601	6.12e-18	0.0273248	0	3.24e-19	0	0.00937234	0.0135377	0	0.0184004	0.0153749	0	0.0472371	2.15e-19	0.0472371

## Sheet: S2E - sh_Spi1 quanTIseq
Supplementary Data 2E . Results of immune deconvolution of TIS (+sh_Spi1) by quanTIseq
Input: RNA-seq GEP data generated during present study
GEPs of control;bcl2 mouse Eµ-myc lymphomas, carrying either an sh_Ctrl or sh_Spi1 construct, were immune deconvoluted by xCell. Fractions of all differentiated myeloid cell types (highlighted in yellow) were summed up and represented by an "Aggregate myeloid score" as shown in Supplementary Fig. 4j.
Sample_ID	treatment	sh_TF	Genotype	Phenotype	Aggregate myeloid score	B cell	Macrophage M1	Macrophage M2	Monocyte	Neutrophil	NK cell	T cell CD4+ (non-regulatory)	T cell CD8+	T cell regulatory (Tregs)	Myeloid dendritic cell	uncharacterized cell
6614_UT_sh_Ctrl	UT	Ctrl	Suv39h1 WT	non-senescent	0.0505634	0.414089	0.0211952	0	0.0293682	0	0.0228201	0	0	0.0221892	0	0.490338
6614_UT_sh_Spi1	UT	Spi1	Suv39h1 WT	non-senescent	0.0371585	0.342066	0.0198635	0	0.012056	0.00523899	0.0265626	0.00251532	0	0.022943	0	0.568754
6614_ADR_sh_Ctrl	ADR	Ctrl	Suv39h1 WT	senescent	0.187332	0.705033	0.0776614	0	0.10967	0	0.0225939	0	0	0.0426331	0	0.0424085
6614_ADR_sh_Spi1	ADR	Spi1	Suv39h1 WT	senescent	0.093921	0.474721	0.0429794	0	0.0509416	0	0.0225986	0.0207145	0	0.0223613	0	0.365684
2801_UT_sh_Ctrl	UT	Ctrl	Suv39h1 WT	non-senescent	0.0303653	0.49717	0.021347	0	0	0.00901832	0.00836342	0	0	0.00613347	0	0.457967
2801_UT_sh_Spi1	UT	Spi1	Suv39h1 WT	non-senescent	0.00579195	0.44046	0.00398268	0	0	0.00180926	0.0143752	0	0	0.0127972	0	0.526576
2801_ADR_sh_Ctrl	ADR	Ctrl	Suv39h1 WT	senescent	0.0736575	0.875796	0.0336508	0.0226767	0	0.01733	0.0142896	0	0	0.00610511	0	0.0301521
2801_ADR_sh_Spi1	ADR	Spi1	Suv39h1 WT	senescent	0.0522327	0.623761	0.0308502	0.0111673	0	0.00966243	0.0169891	0	0	0.0100971	0.000552651	0.296921
6054_UT_sh_Ctrl	UT	Ctrl	Suv39h1 WT	non-senescent	0.0186596	0.614085	0.011207	0	0	0.00745267	0.0200432	0	0	0.0213763	0	0.325836
6054_UT_sh_Spi1	UT	Spi1	Suv39h1 WT	non-senescent	0.0207831	0.667154	0.013624	0	0	0.00715909	0.0280062	0	0	0.024817	0	0.25924
6054_ADR_sh_Ctrl	ADR	Ctrl	Suv39h1 WT	senescent	0.0512	0.923905	0.0291967	0.0167278	0	0.0052755	0.0145815	0	0	0.00580637	0	0.00450742
6054_ADR_sh_Spi1	ADR	Spi1	Suv39h1 WT	senescent	0.029263	0.913645	0.0133786	0.0137501	0	0.00213432	0.0198372	0	0	0.00741825	0	0.0298364
9458_UT_sh_Ctrl	UT	Ctrl	Suv39h1 WT	non-senescent	0.0276114	0.447442	0	0	0	0	0.00600269	0	0	0.0119087	0.0276114	0.507035
9458_UT_sh_Spi1	UT	Spi1	Suv39h1 WT	non-senescent	0.0276821	0.340602	0.00646766	0.00476599	0	0	0.0126596	0	0	0.0212554	0.0164484	0.597801
9458_ADR_sh_Ctrl	ADR	Ctrl	Suv39h1 WT	senescent	0.0530131	0.515003	0.0216752	0.0265276	0	0	0.00132115	0	0	0.0059238	0.00481028	0.424739
9458_ADR_sh_Spi1	ADR	Spi1	Suv39h1 WT	senescent	0.0170042	0.456842	0.00152727	0.00281946	0	0	0.00759331	0	0	0.00844902	0.0126575	0.510111
7069_UT_sh_Ctrl	UT	Ctrl	Suv39h1 WT	non-senescent	0.00453716	0.594315	0.00421627	0.000320894	0	0	0.00663621	0	0	0.000825899	0	0.393686
7069_ADR_sh_Ctrl	ADR	Ctrl	Suv39h1 WT	senescent	0.0448005	0.650487	0	0.0113588	0.0235211	0.00645267	0.0225466	0	0	0.0144829	0.00346797	0.267683

## Sheet: S2F - sh_Spi1 CIBERSORT
Supplementary Data 2F . Results of immune deconvolution of TIS (+sh_Spi1) by CIBERSORT
Input: RNA-seq GEP data generated during present study
GEPs of control;bcl2 mouse Eµ-myc lymphomas, carrying either an sh_Ctrl or sh_Spi1 construct, were immune deconvoluted by xCell. Fractions of all differentiated myeloid cell types (highlighted in yellow) were summed up and represented by an "Aggregate myeloid score" as shown in Supplementary Fig. 4j.
Sample_ID	treatment	sh_TF	Genotype	Phenotype	Aggregate myeloid score	B.cells.naive	B.cells.memory	Plasma.cells	T.cells.CD8	T.cells.CD4.naive	T.cells.CD4.memory.resting	T.cells.CD4.memory.activated	T.cells.follicular.helper	T.cells.regulatory..Tregs.	T.cells.gamma.delta	NK.cells.resting	NK.cells.activated	Monocytes	Macrophages.M0	Macrophages.M1	Macrophages.M2	Dendritic.cells.resting	Dendritic.cells.activated	Mast.cells.resting	Mast.cells.activated	Eosinophils	Neutrophils
6614_UT_sh_Ctrl	UT	Ctrl	Suv39h1 WT	non-senescent	0.00927765	0.0379359	0.348078	0.419664	0	0.122475	0.0271878	0	0	0	0	0.0353808	0	0.00417998	0	0	0	0	0.00261039	0	0	0	0.00248727
6614_UT_sh_Spi1	UT	Spi1	Suv39h1 WT	non-senescent	0.0216007	0.0309151	0.384226	0.228865	0	0.189617	0.0519976	0.00422971	0	0	0	0.0749656	0	0.0144734	0	0	0	0	0.00712732	0	0.0107658	0.00281798	0
6614_ADR_sh_Ctrl	ADR	Ctrl	Suv39h1 WT	senescent	0.058151	0	0.446898	0.116129	0.0209218	0.129292	0.010714	0.0157747	0	0.00331529	0	0.163084	0	0.0358403	0	0	0.0173016	0	0.00500909	0	0.0277965	0.00792416	0
6614_ADR_sh_Spi1	ADR	Spi1	Suv39h1 WT	senescent	0.0582391	0.082294	0.34867	0.0938564	0.0157093	0.166149	0.0311531	0.0457354	0	0	0	0.131326	0	0.0414699	0.00865465	0	0.00332321	0	0.0047913	0	0	0.0268673	0
2801_UT_sh_Ctrl	UT	Ctrl	Suv39h1 WT	non-senescent	0.0474415	0.28756	0.318267	0.259139	0	0.0396968	0.000775546	0	0	0	0	0.0312612	0	0.00452967	0	0	0.00867027	0.0198184	0.0144231	0	0	0.0158583	0
2801_UT_sh_Spi1	UT	Spi1	Suv39h1 WT	non-senescent	0.0266847	0.383326	0	0.356431	0	0.103119	0.0127921	0.00804025	0.00841001	0	0	0.0829527	0	0.0122522	0.00194435	0	0	0.00909472	0.00339342	0	0	0.0182444	0
2801_ADR_sh_Ctrl	ADR	Ctrl	Suv39h1 WT	senescent	0.0767847	0.445507	0	0.408337	0	0.022723	0.00243511	0.00576517	0	0	0	0.016619	0	0	0	0	0	0.0610042	0.0157805	0	0	0.0218291	0
2801_ADR_sh_Spi1	ADR	Spi1	Suv39h1 WT	senescent	0.0151145	0.488358	0.0897181	0.329736	0	0.0326963	0	0.000407413	0	0	0	0.0264604	0	0.00468001	0.000531572	0	0.0040866	0	0.00581629	0.00138113	0	0.0161287	0
6054_UT_sh_Ctrl	UT	Ctrl	Suv39h1 WT	non-senescent	0.035063	0.389086	0.321083	0	0.00123091	0	0.0660286	0.00403431	0.0048148	0	0	0.163368	0	0.0185379	0.0128104	0	0	0	0.0037147	0	0.0152924	0	0
6054_UT_sh_Spi1	UT	Spi1	Suv39h1 WT	non-senescent	0.0379981	0.269202	0.456466	0	0.00310433	0.0489815	0	0.0151871	0	0.00317174	0	0.148935	0	0.0227699	0.0134728	0	0	0	0.00175535	0	0.0169538	0	0
6054_ADR_sh_Ctrl	ADR	Ctrl	Suv39h1 WT	senescent	0.0464972	0	0.769107	0	0	0.0687382	0	0.0150227	0	0.00253439	0	0.0813034	0	0.0261507	0.00900892	0	0	0	0.0113376	0	0.0102649	0.00653165	0
6054_ADR_sh_Spi1	ADR	Spi1	Suv39h1 WT	senescent	0.00836023	0.270362	0.580289	0	0	0.067935	0	0.00607727	0	0	0.0163981	0.0470421	0	0	0	0	0	0	0.00836023	0	0	0.00353627	0
9458_UT_sh_Ctrl	UT	Ctrl	Suv39h1 WT	non-senescent	0.0266016	0.520288	0	0.173071	0	0.0945465	0.0968744	0.0160874	0	0	0	0.0713417	0	0.0100094	0.00782616	0	0	0.00856728	0.000198705	0	0	0.00118929	0
9458_UT_sh_Spi1	UT	Spi1	Suv39h1 WT	non-senescent	0.0106658	0.37819	0	0.455242	0	0.0981687	0.00734424	0	0	0	0	0.0503887	0	0.00350016	7.95241e-05	0	0	0.00708613	0	0	0	0	0
9458_ADR_sh_Ctrl	ADR	Ctrl	Suv39h1 WT	senescent	0.0261875	0.135467	0	0.79539	0	0.0264531	0	0	0.00334978	0	0	0.0109615	0	0.000117253	0	0	0	0.0260702	0	0	0	0.00219116	0
9458_ADR_sh_Spi1	ADR	Spi1	Suv39h1 WT	senescent	0.017634	0.376505	0	0.505401	0	0.0602277	0	0	0.00493224	0	0	0.0341053	0	0	0.00208613	0	0	0.0155479	0	0	0	0.00119518	0
7069_UT_sh_Ctrl	UT	Ctrl	Suv39h1 WT	non-senescent	0.00790451	0.140256	0.150533	0.569414	0.00111786	0.0784278	0.0161909	0	0	0	0	0.0342746	0	0.00443039	0.00233407	0	3.57705e-05	0	0.00110428	0	0.00188128	0	0
7069_ADR_sh_Ctrl	ADR	Ctrl	Suv39h1 WT	senescent	0.0226685	0.411312	0	0.495638	0	0.0299562	0.0129026	0	0	0	0	0.0233794	0	3.35317e-05	0.00371381	0.00968693	0.00744225	0	0.00179196	0.00414343	0	0	0

## Sheet: S2G - DLBCL xCell
Supplementary Data 2G . Results of immune deconvolution of DLBCL (-/+ ADR) by xCell
Input: RNA-seq GEP data generated during present study
GEPs of DLBCL cell lines, either unteated and sorted for CellTraceLow or ADR treated and sorted for CellTraceHigh cell fractions, were immune deconvoluted by xCell. Scores of all differentiated myeloid cell types (highlighted in yellow) were summed up and represented by an "Aggregate myeloid score" as shown in Supplementary Fig. 5g.
Sample_ID	cell_line	treatment	Senescence category	Aggregate myeloid score	Myeloid dendritic cell activated	B cell	T cell CD4+ memory	T cell CD4+ naive	T cell CD4+ (non-regulatory)	T cell CD4+ central memory	T cell CD4+ effector memory	T cell CD8+ naive	T cell CD8+	T cell CD8+ central memory	T cell CD8+ effector memory	Class-switched memory B cell	Common lymphoid progenitor	Common myeloid progenitor	Myeloid dendritic cell	Endothelial cell	Eosinophil	Cancer associated fibroblast	Granulocyte-monocyte progenitor	Hematopoietic stem cell	Macrophage	Macrophage M1	Macrophage M2	Mast cell	B cell memory	Monocyte	B cell naive	Neutrophil	NK cell	T cell NK	Plasmacytoid dendritic cell	B cell plasma	T cell gamma delta	T cell CD4+ Th1	T cell CD4+ Th2	T cell regulatory (Tregs)	immune score	stroma score	microenvironment score
DB_UT	DB	UT	Sen_Comp	0.000949488	8.47662e-19	1.87593e-18	2.20047e-18	0	1.54593e-17	0	1.20115e-18	2.5726e-19	1.95922e-19	0	5.81785e-18	1.56406e-17	0.00375774	2.82641e-19	0	0.00126916	0	0.0387045	5.32861e-18	0.197095	0	8.28539e-19	0.000949488	0.0137368	0	0	0	0	0	0.000838663	9.04771e-18	0.0039305	0	0	0.108027	1.65618e-18	0.00915788	0.0199869	0.0291447
Karpas422_UT	Karpas422	UT	Sen_Comp	0.017171	0.00296862	0.126392	0	5.98076e-18	2.04523e-19	9.96676e-19	0	0.00592009	0	0.00198753	0	0	0.049342	0	1.4858e-18	0	0	0	0	0.12241	0.00776571	0.0023791	0.00405757	0.0106544	0.0635579	0	3.60741e-21	1.25303e-20	8.27466e-19	0.00712553	0	0.0315269	0	0	0.0823733	6.90663e-18	0.0965412	2.19175e-19	0.0965412
RCK8_UT	RCK8	UT	Sen_Comp	0.434253	0.387136	5.98005e-20	0.00101852	4.09289e-19	0	0.00768191	0.0312507	0.0102312	0.00168169	7.9521e-19	0	0.0225701	0.00371269	0	0.030152	0	0	0.0100238	0	0.0039978	0.00539645	0.0115681	0	3.32559e-21	2.45252e-18	0	0	1.39491e-18	0	0.017874	0	0	0	0.00938701	0.0952458	0.00342246	0.0248201	0.00501192	0.029832
SUDHL10_UT	SUDHL10	UT	Sen_Comp	0.0101143	5.8248e-19	0.0532435	3.03793e-19	1.28721e-18	8.54384e-18	1.18309e-17	0.0104432	0.00197697	1.49379e-19	1.00139e-18	7.18434e-19	1.858e-19	0.0323693	0	0.00520564	7.78141e-22	0	0	0	0.11865	1.05189e-19	3.43533e-19	0.00419782	0.0252213	0.0127409	2.83482e-18	1.09698e-18	9.34176e-19	0	0.0260676	0.000710846	0.0141464	0.00933175	0.00171435	0.0935233	5.13073e-18	0.0557803	3.8907e-22	0.0557803
U2932_UT	U2932	UT	Sen_Comp	0.0953516	0.0702508	0.0862169	0	1.01198e-17	0	1.01476e-17	0.00985596	0.00709174	0.00127492	0.0243443	2.04868e-18	0.0936491	0.0095446	1.66954e-18	0.00280138	0.000517601	0	0	2.80779e-18	0.136793	0.00358334	0.00367451	0.00739841	0.018443	0.0153409	2.06985e-18	0	0	5.44586e-18	6.43673e-19	0.00764317	0.0635709	0	0	0.100602	0	0.0748797	0.0002588	0.0751385
WSUDLCL2_UT	WSUDLCL2	UT	Sen_Comp	0.0252953	0.00916648	0.0892925	7.67406e-21	0	8.23838e-18	5.72737e-18	0.0120776	0.00352936	1.78662e-19	0.0055558	0	0	0.0140889	0	0.000456145	3.515e-19	0.000931485	0	0	0.11252	0.00336741	1.86765e-20	0.0123053	0.0212471	0.0264325	0	0.00468778	0	0	0.0137572	0	0.0291557	1.54968e-18	0	0.119213	0	0.0768632	1.7575e-19	0.0768632
DB_ADR	DB	ADR	Sen_Comp	0.0312291	0.0162604	0.033388	0	0	0	0	1.29762e-20	0	0.00328925	3.55273e-22	4.2669e-18	0	0.0053357	8.62834e-05	0.00373039	0.000865224	0.000578982	0.0273121	0	0.214264	0.00250621	7.77421e-19	0.00873216	0.0248842	4.59753e-18	7.3103e-18	0.0209748	4.57275e-20	0	0	3.509e-18	0.00712469	1.01579e-18	4.06823e-18	0.114929	0.000969885	0.0455847	0.0140887	0.0596734
Karpas422_ADR	Karpas422	ADR	Sen_Comp	0.0386751	0.0118111	0.168922	0	1.87737e-19	2.09481e-18	1.78166e-18	2.64087e-18	0	0	0.0107214	3.71717e-20	0	0.027949	2.48412e-19	0	5.39542e-20	0.00278323	0	3.40493e-18	0.119268	0.0117857	0.00312127	0.0119571	0.0173994	0.0809962	0	0.0133422	0	0	0.00199471	3.87006e-18	0.040672	4.11749e-18	1.21738e-17	0.0512928	0	0.133927	6.55789e-05	0.133992
RCK8_ADR	RCK8	ADR	Sen_Comp	0.73308	0.682944	0	0.000670752	0	0.00928152	0.0375323	0.0479018	0.00804888	0.00233425	0.000720958	4.91501e-19	0.0356491	0	0	0.0238619	0	0.00130507	0.0292551	1.14359e-21	2.07825e-18	0.00522279	0.0191987	0.000859498	2.07752e-05	0	1.86175e-18	2.89945e-19	0.000726002	0.00222969	6.59033e-19	0.000266562	0.00136985	3.54814e-18	0	0	0.0625049	0.029988	0.0146275	0.0446155
SUDHL10_ADR	SUDHL10	ADR	Sen_Comp	0.108884	0.0263045	0.0998614	1.12967e-19	8.06852e-19	6.13015e-19	5.75257e-18	0.0264212	0	6.16919e-20	0	0	0.00520397	0.014586	0	0.0238983	0	0.010819	8.9037e-19	0	0.0833844	0.00953938	2.97703e-18	0.0160285	0.0211495	0.0448234	9.61018e-19	0.00888207	0	0	0.0247841	0.033113	0.00401999	1.19746e-17	9.91481e-19	0.143226	0	0.110178	4.45185e-19	0.110178
U2932_ADR	U2932	ADR	Sen_Comp	0.238493	0.170515	0.118406	0	6.59564e-18	0	0	0.0277942	0.00868669	0.0177204	0.0493028	4.30259e-18	0.101298	0.0079981	7.37249e-19	0.00585001	0.00249951	0	2.60066e-18	0	0.0983755	0.0128169	0.00978004	0.0162919	0.0123554	0.0304473	0	0.00668313	8.50861e-19	4.36658e-18	6.83348e-19	0.0232394	0.0772349	0	0	0.109403	0.00811572	0.111433	0.00124975	0.112682
WSUDLCL2_ADR	WSUDLCL2	ADR	Sen_Comp	0.0639587	0.0144295	0.122415	7.01664e-19	0	4.44067e-18	5.72819e-18	0.0232483	0.00110127	0.00349941	0.0137501	0	0	0.00664141	0	0.00215171	0	0.00113191	0	0	0.116421	0.0119153	0	0.0293614	0.0162686	0.0443901	9.07555e-19	0.0146857	3.95671e-19	1.72901e-18	0	0.00610079	0.024253	4.68501e-18	4.42192e-19	0.123604	0	0.104922	0	0.104922
OCILY1_UT	OCILY1	UT	Intermediate	0.00837642	1.84198e-18	0.0677217	0	4.56217e-19	2.63937e-18	1.35792e-18	1.75758e-17	0	4.54545e-20	0	9.20561e-18	0	0.00291721	0	0	0.000490505	1.62261e-18	0	0	0.1099	0.0012285	6.75073e-20	0.00714791	0.011623	0.0149559	1.50135e-18	0.0402075	0	3.65421e-18	1.36292e-19	5.46359e-19	0.00761531	0	0	0.0808945	0	0.0537155	0.000245253	0.0539607
OCILY18_UT	OCILY18	UT	Intermediate	0.00482165	0.00482165	0.0388597	6.11804e-20	8.11516e-19	1.15242e-17	0	0	0	1.17857e-17	0	4.70133e-18	9.01655e-18	0.0939395	5.67502e-18	1.28439e-19	2.02402e-19	0	1.78554e-17	3.47141e-18	0.0680435	0	6.48664e-19	0	0.00456124	1.76814e-18	3.42747e-17	1.72958e-18	0	0	0	0	0	0	0	0.057017	0	0.0289473	9.0289e-18	0.0289473
RI1_UT	RI1	UT	Intermediate	0.0406935	0.00597102	0.0852667	0	7.37217e-19	5.85404e-18	3.48936e-20	8.08585e-19	0.00314317	2.58594e-18	0.002995	4.12812e-18	0.0610114	0.00249485	0	0.00051221	0	1.41224e-18	0	0	0.0765252	0	0.00156352	0.00876612	0.010404	0.0278914	0	0.0165229	9.99731e-19	0	1.6712e-20	0.0238806	0	0.00230613	0	0.0519076	0	0.0641219	1.29499e-19	0.0641219
SUDHL2_UT	SUDHL2	UT	Intermediate	0.110636	0.0885066	0.0242821	0	0	4.87227e-18	0	1.43841e-18	0.00540792	1.88913e-19	0	1.48e-17	0.0361831	0	4.18765e-19	4.55837e-20	0.000431391	0	0	0	0.105342	0.0074062	0.00312315	0.0116004	0.0203038	6.9379e-19	4.58943e-18	0.00570246	5.58288e-21	0	0.00370073	6.47918e-19	0.00292302	4.81822e-18	0	0.130134	1.38544e-17	0.0346615	0.000215696	0.0348772
SUDHL4_UT	SUDHL4	UT	Intermediate	0.010386	0.00475498	0.0956817	0	1.79379e-18	2.34986e-18	5.13839e-19	0	0.00376728	0	0.0127515	5.5137e-19	0	0.0249351	2.20696e-18	9.14891e-21	0	0	1.02495e-18	0	0.123672	0.00033528	3.03197e-20	0.00529575	0.0152476	0.0305241	0	0.0162249	0	0	0.00100176	0	0.0255242	2.15115e-19	2.46873e-19	0.124302	0	0.0741764	5.38902e-19	0.0741764
TOLEDO_UT	TOLEDO	UT	Intermediate	0.0263432	0.0105066	0.0208324	0	0	4.10885e-18	9.81435e-19	0.0149296	0	0	2.61481e-18	2.22937e-19	0.00174872	0.139091	3.80306e-20	1.5652e-20	0	2.86037e-18	9.62313e-18	3.68507e-18	0.0471146	5.50811e-20	0	0	0.00213933	0	0	0	0	2.4118e-17	1.90709e-19	0.0158366	1.52532e-17	0	0	0.0835274	1.71411e-18	0.0153145	4.81157e-18	0.0153145
OCILY1_ADR	OCILY1	ADR	Intermediate	0.0128928	4.63973e-18	0.089133	1.04412e-20	0	2.62642e-18	0	0	0	0.0168553	0.00792554	1.71228e-19	0	2.48446e-20	3.03159e-18	0	5.06121e-20	0	1.04596e-17	6.11268e-18	0.122479	3.25591e-19	3.09682e-19	0.0128928	0.0140964	0.0234537	8.37168e-19	0.0500719	0	0	3.11749e-19	2.17578e-18	0.00823907	1.63838e-18	0	0.0827963	0	0.0800565	5.33967e-18	0.0800565
OCILY18_ADR	OCILY18	ADR	Intermediate	0.0138953	0.0132381	0.0820391	0	0	5.51473e-18	2.83376e-20	7.89444e-19	1.96774e-20	2.35703e-18	0.00388918	3.32265e-19	0	0.0484108	1.05858e-18	1.02143e-18	2.9944e-20	0	0	0	0.108534	0	6.72456e-19	0.000657249	0.00485075	0.00706153	0	0.00975421	0	7.10045e-18	0	3.37091e-18	0	4.25587e-18	0	0.0230751	0	0.0579266	5.95544e-20	0.0579266
RI1_ADR	RI1	ADR	Intermediate	0.288919	0.229329	0.0254791	0	4.81725e-19	2.74229e-18	0.00988637	0.0351049	0.00469878	0	0	1.12261e-18	0.0613103	1.15936e-19	4.85047e-19	0.00840736	0	3.49095e-20	1.14219e-19	0	0.027032	0.00527502	0.0150375	0.010063	0.00710972	0.00801275	0	0.00367052	9.19285e-19	3.72756e-19	0.00408431	0.0208072	8.42065e-19	0	0	0.0491848	0	0.0308475	9.16889e-20	0.0308475
SUDHL2_ADR	SUDHL2	ADR	Intermediate	0.132357	0.0966658	0.0568609	0	0.00285569	0	2.35437e-18	0.00585476	0.00326987	0.00369619	0.00430038	1.36196e-18	0.0616114	1.20437e-19	0	0.000689549	0	0.0028347	0	5.466e-19	0.102969	0.0125457	0.00169745	0.0155669	0.0221363	0.00325923	2.74729e-18	0.00775641	2.72967e-19	4.72008e-18	0.00611017	0.00519179	0.005901	4.17689e-19	4.10517e-18	0.112696	1.58096e-20	0.0658422	0	0.0658422
SUDHL4_ADR	SUDHL4	ADR	Intermediate	0.0452313	0.0219253	0.163861	0	9.38632e-19	0	0.00162371	0.0243439	0.00163825	0.000583988	0.0162804	4.57578e-18	0.0131275	0.00759605	4.60565e-20	0.000994291	0.00201899	0.0085118	4.54016e-18	0	0.0946739	0.00458186	1.86732e-18	0.0177298	0.0117159	0.0604575	0	0.0366005	2.21714e-19	6.93499e-18	0.00728831	2.7579e-19	0.0337024	7.94982e-19	0	0.0601327	0	0.126833	0.0010095	0.127842
TOLEDO_ADR	TOLEDO	ADR	Intermediate	0.0291593	0.0127109	0.0020991	1.58373e-19	4.97959e-18	0	1.38253e-19	0.0401155	2.4567e-18	2.72405e-18	0	9.64999e-18	5.22291e-19	0.119216	0	0	0	2.63941e-18	0.0130552	2.9666e-18	0.0450879	0	0	0	0.00111458	2.61605e-17	0	0	0	9.2893e-18	0.000792923	0.0164483	0	1.33325e-18	0	0.0526463	6.25146e-20	0.00214245	0.00652762	0.00867007
CARNAVAL_UT	CARNAVAL	UT	Sen_Incomp	0.028402	0.027965	0.0936569	0	1.63871e-18	2.76041e-18	2.06042e-18	2.68991e-18	0.012136	0	0.0105626	9.70062e-18	0.0144216	0.0157194	1.71212e-18	4.83593e-20	2.40272e-19	0	2.25948e-18	0	0.205013	1.43664e-19	4.35118e-20	0.000437013	0.0138858	0.0093645	0	0.0173307	0	0	0	6.63641e-18	0.0305485	0.00950697	3.34361e-18	0.0900559	0	0.0716951	1.29504e-18	0.0716951
DOHH2_UT	DOHH2	UT	Sen_Incomp	0.00773398	0.00468272	0.0770347	8.79411e-22	0	0	1.03922e-17	2.6659e-20	0.0060898	4.36086e-19	0	1.85171e-18	0.000812677	0.0220242	0	1.52854e-19	1.90017e-19	5.03234e-19	4.51153e-19	0	0.173429	0	0	0.00276602	0.0172485	0.0135664	2.35987e-18	0.0105091	0.000285238	1.14828e-18	6.32979e-05	1.31575e-18	0.0228043	4.59612e-18	2.79654e-18	0.113308	4.25965e-18	0.0630456	3.3174e-19	0.0630456
NUDHL1_UT	NUDHL1	UT	Sen_Incomp	0.034281	0	0.0688298	0.000367794	1.80472e-18	3.88561e-18	0	0.00864606	0.0131141	0	0	9.59594e-18	4.4772e-19	0.0225423	2.94776e-19	2.92261e-19	4.62989e-19	0	0	0	0.0705223	0.0124258	1.13232e-18	0.0164561	0.0279016	0.0293652	0	0.0162009	0	0	0.000992354	0.00539907	7.6948e-19	0.00273281	0	0.0781832	2.69938e-19	0.0727715	2.31494e-19	0.0727715
OCILY7_UT	OCILY7	UT	Sen_Incomp	0.00393392	0	0.080583	0.0195616	0	0	0.0222519	0.0489019	0.0098717	0.00306803	0.0137784	1.19062e-18	0	0.0195664	0.000495021	7.23759e-20	0.000522465	0.000144851	6.766e-18	4.85617e-19	0.152653	0	2.82403e-19	0.00349938	0.020244	0.0201622	3.80865e-18	0.00803	0	0	6.21766e-22	0.000434534	0.0282594	0.0276617	0	0.0794393	1.80557e-18	0.06936	0.000261232	0.0696212
SUDHL5_UT	SUDHL5	UT	Sen_Incomp	0.0283323	0.0238987	0.0215108	0	5.44557e-18	2.17325e-18	6.96786e-18	2.47315e-19	0.00415897	0	0	2.97237e-18	0	0.0240949	2.85138e-18	0	4.23466e-20	0	3.15092e-18	0	0.164667	0	0	0.00443355	0.0270449	1.36507e-18	0	0.010346	0	1.08257e-17	0	0	0.0252501	0	4.25338e-18	0.117227	0	0.0323704	1.59663e-18	0.0323704
SUDHL6_UT	SUDHL6	UT	Sen_Incomp	0.0392301	0.0347291	0.178644	0	0	0	1.34978e-19	0.00885048	0.00844091	2.02902e-18	1.38739e-19	3.57189e-18	0.0212636	0.00340973	2.407e-19	0	0.00374721	1.07515e-18	0	3.32744e-19	0.115779	1.34947e-19	0	0.00249534	0.0197913	0.0405903	5.4908e-18	0.0314229	0	0	0.012709	0.00200569	0.0150859	4.3237e-19	5.35717e-18	0.149944	4.897e-18	0.13229	0.00187361	0.134164
CARNAVAL_ADR	CARNAVAL	ADR	Sen_Incomp	0.039151	0.0381067	0.114047	7.4213e-21	0	0	0.00404139	0.00965325	0.00925515	0	0.00806785	5.55013e-18	0.021997	0.0110972	2.81866e-18	2.41364e-21	0	3.07297e-19	0.0194868	0	0.189258	8.46515e-19	2.11058e-19	0.0010443	0.0139882	0.0175922	0	0.0209953	1.57339e-19	0	0.00683288	0	0.0270575	0.00808113	0	0.0678539	6.01552e-19	0.0853568	0.00974338	0.0951001
DOHH2_ADR	DOHH2	ADR	Sen_Incomp	0.016149	0.00790409	0.131468	7.31452e-19	4.46193e-18	0	2.06648e-18	1.33205e-17	0.00315338	6.27348e-18	1.27155e-19	8.64655e-18	0.00672145	0.0145578	2.73835e-19	2.05412e-19	3.0645e-19	0	1.44321e-17	0	0.166592	0.000976864	7.05616e-19	0.00726806	0.0158656	0.0277717	1.15112e-18	0.0231625	9.62755e-25	8.03494e-20	0.0163509	1.22637e-17	0.0241228	1.34851e-21	0.00401761	0.0677529	0	0.098874	7.41953e-18	0.098874
NUDHL1_ADR	NUDHL1	ADR	Sen_Incomp	0.0301286	1.23501e-18	0.0751505	0	0	3.58843e-18	0.00317702	0.00842883	0.00878076	2.91492e-18	7.24793e-19	3.363e-18	0	0.00217184	0	9.1005e-19	3.54494e-18	0.000222742	3.80182e-19	1.52847e-17	0.0589075	0.00804087	2.52102e-18	0.0168712	0.035598	0.023999	3.45115e-18	0.0213278	0	8.19949e-18	0.00932256	0.00521652	2.18069e-19	0.0146265	0	0.0133177	0.00620128	0.0793414	2.00676e-18	0.0793414
OCILY7_ADR	OCILY7	ADR	Sen_Incomp	0.0199371	1.98419e-18	0.09712	0.00846681	0	0	0.0250336	0.063668	0.0105176	0.000434345	0.0079525	0.00244894	1.70324e-19	0.011691	0.00103517	1.09786e-21	0.00096684	0.000904534	7.26713e-18	1.46551e-18	0.144852	5.70555e-19	1.73296e-19	0.00844707	0.0194358	0.0264896	0	0.0125863	1.26764e-18	0	0.001247	0.0114901	0.0396308	0.0358885	0.00247467	0.0576023	4.05936e-18	0.0785965	0.00048342	0.0790799
SUDHL5_ADR	SUDHL5	ADR	Sen_Incomp	0.0277766	0.0243583	0.0329703	6.77869e-20	8.50448e-18	2.03309e-19	0	0	0.00714524	3.8585e-18	3.01767e-21	0	1.15338e-18	0.0140445	0	3.09156e-19	1.7809e-19	0	0	0	0.167304	3.31748e-20	3.03405e-19	0.0034184	0.0300973	0.00252967	2.55318e-18	0.00874514	2.95093e-19	2.72686e-19	1.78748e-18	6.13014e-18	0.0231206	9.16696e-19	7.58763e-18	0.112968	1.1357e-18	0.042045	1.01067e-19	0.042045
SUDHL6_ADR	SUDHL6	ADR	Sen_Incomp	0.0723026	0.0575979	0.238394	0.000738087	0	1.41042e-20	0.00181628	0.0307308	0.0192413	0.00398641	0.00270058	3.42835e-19	0.0374163	0.00172279	0	0.00348549	0	0.0042629	0	0	0.0772892	0.00162203	6.18371e-19	0.00860802	0.0215899	0.0612562	0	0.0427288	0	0	0	0.000989069	0.00999846	9.57398e-20	7.35069e-18	0.152206	6.72763e-18	0.182227	1.13221e-19	0.182227

## Sheet: S2H - DLBCL quanTIseq
Supplementary Data 2H . Results of immune deconvolution of DLBCL (-/+ ADR) by quanTIseq
Input: RNA-seq GEP data generated during present study
GEPs of DLBCL cell lines, either unteated and sorted for CellTraceLow or ADR treated and sorted for CellTraceHigh cell fractions, were immune deconvoluted by quanTIseq. Scores of all differentiated myeloid cell types (highlighted in yellow) were summed up and represented by an "Aggregate myeloid score" as shown in Supplementary Fig. 5g.
cell_type	cell_line	treatment	Senescence category	Aggregate myeloid score	B cell	Macrophage M1	Macrophage M2	Monocyte	Neutrophil	NK cell	T cell CD4+ (non-regulatory)	T cell CD8+	T cell regulatory (Tregs)	Myeloid dendritic cell	uncharacterized cell
DB_UT	DB	UT	Sen_Comp	0.129606	0.315615	0	0	0	0.0810539	0	0	0	0	0.0485526	0.554778
Karpas422_UT	Karpas422	UT	Sen_Comp	0.185675	0.562987	0	0	0	0.0177448	0.0812349	0	0	0	0.167931	0.170103
RCK8_UT	RCK8	UT	Sen_Comp	0.172528	0.0746034	0.113553	0.00129297	0.0163986	0	0.0114228	0	0	0.0263256	0.0412836	0.71512
SUDHL10_UT	SUDHL10	UT	Sen_Comp	0.173026	0.249533	0.00676509	0	0	0.0374604	0	0	0	0	0.1288	0.577441
U2932_UT	U2932	UT	Sen_Comp	0.113665	0.603119	0.0247705	0.010935	0	0.0378694	0	0	0	0	0.0400899	0.283216
WSUDLCL2_UT	WSUDLCL2	UT	Sen_Comp	0.336635	0.312482	0.0533052	0	0	0.183344	0	0	0	0	0.099986	0.350883
DB_ADR	DB	ADR	Sen_Comp	0.17003	0.313781	0.00348708	0.000838772	0	0.092613	0	0	0	0	0.0730911	0.516189
Karpas422_ADR	Karpas422	ADR	Sen_Comp	0.21168	0.650203	0	0	0	0	0.138116	0	0	0	0.21168	0
RCK8_ADR	RCK8	ADR	Sen_Comp	0.75993	0.0612294	0.620815	0	0.124752	0.0143639	0.0344315	0	0	0.123135	0	0.0212735
SUDHL10_ADR	SUDHL10	ADR	Sen_Comp	0.226186	0.324144	0.0570896	0	0	0	0.00465063	0	0	0	0.169097	0.445019
U2932_ADR	U2932	ADR	Sen_Comp	0.142912	0.600067	0.047739	0.00690337	0	0.0150228	0	0	0	0	0.0732467	0.257021
WSUDLCL2_ADR	WSUDLCL2	ADR	Sen_Comp	0.368499	0.369186	0.0901711	0	0	0.127275	0.00943781	0	0	0	0.151053	0.252878
OCILY1_UT	OCILY1	UT	Intermediate	0.161798	0.347892	0.00217674	0	0	0.159621	0	0	0	0	0	0.49031
OCILY18_UT	OCILY18	UT	Intermediate	0.0912403	0.392396	0	0.0045415	0	0.0640906	0	0	0	0	0.0226082	0.516363
RI1_UT	RI1	UT	Intermediate	0.0131858	0.857595	0.0131858	0	0	0	0	0	0	0	0	0.129219
SUDHL2_UT	SUDHL2	UT	Intermediate	0.224143	0.453985	0.0752221	0	0	0	0	0	0	0	0.148921	0.321871
SUDHL4_UT	SUDHL4	UT	Intermediate	0.215282	0.278177	0.0102745	0	0	0.170379	0	0	0	0	0.0346283	0.506541
TOLEDO_UT	TOLEDO	UT	Intermediate	0.189374	0.384661	0.00578186	0	0.00855181	0.169008	0	0	0	0	0.00603247	0.425965
OCILY1_ADR	OCILY1	ADR	Intermediate	0.209788	0.325181	0.00295439	0	0	0.206834	0	0	0	0.00293751	0	0.462093
OCILY18_ADR	OCILY18	ADR	Intermediate	0.230554	0.467577	0	0	0	0.0349405	0	0	0	0	0.195613	0.30187
RI1_ADR	RI1	ADR	Intermediate	0.0614762	0.530702	0.0369898	0.00309966	0	0	0	0	0	0	0.0213867	0.407822
SUDHL2_ADR	SUDHL2	ADR	Intermediate	0.290303	0.493859	0.12425	0	0	0.0305939	0	0	0	0	0.135459	0.215838
SUDHL4_ADR	SUDHL4	ADR	Intermediate	0.207079	0.43008	0.0309747	0	0	0.0853811	0.000427482	0	0	0	0.0907228	0.362414
TOLEDO_ADR	TOLEDO	ADR	Intermediate	0.233757	0.440201	0.00342101	0.00263201	0	0.185176	0	0	0	0	0.0425284	0.326042
CARNAVAL_UT	CARNAVAL	UT	Sen_Incomp	0.20729	0.69953	0.004794	0	0	0.202496	0	0	0	0	0	0.0931798
DOHH2_UT	DOHH2	UT	Sen_Incomp	0.190689	0.221936	0	0	0	0.160187	0	0	0	0	0.0305022	0.587375
NUDHL1_UT	NUDHL1	UT	Sen_Incomp	0.105198	0.528262	0	0	0.105198	0	0.00328152	0.199894	0	0	0	0.163365
OCILY7_UT	OCILY7	UT	Sen_Incomp	0.0941002	0.478812	0	0	0	0.043292	0	0	0	0	0.0508083	0.427088
SUDHL5_UT	SUDHL5	UT	Sen_Incomp	0.106245	0.220411	0	0	0	0.080543	0	0	0	0	0.025702	0.673344
SUDHL6_UT	SUDHL6	UT	Sen_Incomp	0.0913993	0.283594	0.0173729	0	0	0.0407126	0	0	0	0.000216454	0.0333137	0.624791
CARNAVAL_ADR	CARNAVAL	ADR	Sen_Incomp	0.218153	0.781847	0.0108239	0	0	0.207329	0	0	0	0	0	0
DOHH2_ADR	DOHH2	ADR	Sen_Incomp	0.190977	0.342191	0.00114295	0	0	0.109454	0	0	0	0	0.0803797	0.466832
NUDHL1_ADR	NUDHL1	ADR	Sen_Incomp	0.0311056	0.547763	0	0	0.0311056	0	0	0.39496	0	0.026171	0	0
OCILY7_ADR	OCILY7	ADR	Sen_Incomp	0.111947	0.588483	0	0	0	0.0433184	0	0	0	0	0.0686287	0.29957
SUDHL5_ADR	SUDHL5	ADR	Sen_Incomp	0.139203	0.23947	0	0	0	0.0690761	0.00694083	0	0	0	0.0701273	0.614386
SUDHL6_ADR	SUDHL6	ADR	Sen_Incomp	0.117101	0.346505	0.0307161	0	0	0.00197762	0.00164932	0	0	0.009758	0.0844071	0.524987

## Sheet: S2I - DLBCL CIBERSORT
Supplementary Data 2I . Results of immune deconvolution of DLBCL (-/+ ADR) by CIBERSORT
Input: RNA-seq GEP data generated during present study
GEPs of DLBCL cell lines, either unteated and sorted for CellTraceLow or ADR treated and sorted for CellTraceHigh cell fractions, were immune deconvoluted by CIBERSORT. Scores of all differentiated myeloid cell types (highlighted in yellow) were summed up and represented by an "Aggregate myeloid score" as shown in Supplementary Fig. 5g.
Sample_ID	cell_line	treatment	Senescence category	Aggregate myeloid score	B.cells.naive	B.cells.memory	Plasma.cells	T.cells.CD8	T.cells.CD4.naive	T.cells.CD4.memory.resting	T.cells.CD4.memory.activated	T.cells.follicular.helper	T.cells.regulatory..Tregs.	T.cells.gamma.delta	NK.cells.resting	NK.cells.activated	Monocytes	Macrophages.M0	Macrophages.M1	Macrophages.M2	Dendritic.cells.resting	Dendritic.cells.activated	Mast.cells.resting	Mast.cells.activated	Eosinophils	Neutrophils
DB_UT	DB	UT	Sen_Comp	0.0805974	0.407796	0.0656457	0	0.0189207	0	0.185084	0.000156095	0	0	0	0.2418	0	0.0522194	0.00403262	0	0	0	0.0243453	0	0	0	0
Karpas422_UT	Karpas422	UT	Sen_Comp	0.00360895	0	0.98155	0	0	0	0	0	0.00611167	0	0	0.00405414	0	0	0	0	0.00285499	0	0.000753958	0	0.00467557	0	0
RCK8_UT	RCK8	UT	Sen_Comp	0.432503	0	0.399833	0	0.00790335	0	0	0.0303464	0.0164313	0.0601104	0	0.0378339	0	0	0	0	0	0	0.432503	0	0	0.0150388	0
SUDHL10_UT	SUDHL10	UT	Sen_Comp	0.0544787	0.203577	0.462564	0	0.0169693	0	0.0899382	0	0.0138726	0.00387296	0	0.153911	0	0.0417784	0.00604933	0	0	0	0.00665096	0	0.000817119	0	0
U2932_UT	U2932	UT	Sen_Comp	0.0421742	0.527195	0.202308	0.16012	0.0201403	0	0	0.019473	0.0188192	0	0	0.00977057	0	0.00187972	0.00728549	0	0	0	0.033009	0	0	0	0
WSUDLCL2_UT	WSUDLCL2	UT	Sen_Comp	0.0385401	0.0473519	0.752384	0	0.0759082	0	0.0493735	0	0.0203509	0.00271494	0	0.00403081	0	0	0.00469324	0	0.0190152	0	0.0148316	0	0.00934526	0	0
DB_ADR	DB	ADR	Sen_Comp	0.194087	0.433842	0.111635	0	0	0.062377	0.14082	0	0	0	0	0.0572385	0	0.0157809	0.00201911	0	0	0	0.176287	0	0	0	0
Karpas422_ADR	Karpas422	ADR	Sen_Comp	0.00380901	0	0.967845	0	0.00363249	0	0	0	0.0109357	0	0	0	0.0101883	0	0	0	0	0	0.00380901	0	0.00358931	0	0
RCK8_ADR	RCK8	ADR	Sen_Comp	0.598437	0.00270188	0.1686	0	0.0150516	0	0	0.0248049	0.0563592	0.0424601	0	0.0761195	0	0	0	0.0343293	0	0	0.564108	0	0	0.0154655	0
SUDHL10_ADR	SUDHL10	ADR	Sen_Comp	0.131548	0.212909	0.562234	0	0.0317858	0.00554854	0	0	0.00540345	0	0	0.0505702	0	0.00670946	0.00571725	0	0.00707648	0	0.112045	0	0	0	0
U2932_ADR	U2932	ADR	Sen_Comp	0.0429213	0.331306	0.353264	0.223566	0.0161711	0	0	0.0129201	0.0143809	0	0	0.00547092	0	0.00218121	0.00398615	0	0	0	0.0367539	0	0	0	0
WSUDLCL2_ADR	WSUDLCL2	ADR	Sen_Comp	0.0535924	0.0482145	0.688195	0	0	0	0.114109	0	0.015012	0.00672683	0	0.070245	0	0	0.000542554	0	0.0144673	0	0.0385825	0	0.00390502	0	0
OCILY1_UT	OCILY1	UT	Intermediate	0.0361668	0.694903	0.0550667	0.039169	0.0358933	0	0.0697678	0	0.0342939	0	0	0.0347399	0	0	0.000343991	0	0.0191173	0	0.0167054	0	0	0	0
OCILY18_UT	OCILY18	UT	Intermediate	0.021015	0.674966	0	0	0.0051075	0	0.184101	0	0	0	0	0.114811	0	0	0.00202702	0	0.00954963	0	0.00943835	0	0	0	0
RI1_UT	RI1	UT	Intermediate	0.0183439	0.329024	0.46994	0.161115	0	0	0	0.00463859	0.00359422	0	0	0.0119543	0	0	0.00176056	0	0.00478055	0	0.0118028	0	0	0.00138963	0
SUDHL2_UT	SUDHL2	UT	Intermediate	0.0349075	0.133764	0.60517	0	0.018177	0	0.106928	0.03429	0.0221715	0	0	0.0397793	0	0.0193727	0.00828329	0	0	0	0.00725145	0	0	0.00481332	0
SUDHL4_UT	SUDHL4	UT	Intermediate	0.0199267	0.248553	0.520007	0	0.0117368	0	0.086717	0	0.0321408	0	0	0.0763286	0	0	0	0	0.0117853	0	0.00814145	0	0.00458996	0	0
TOLEDO_UT	TOLEDO	UT	Intermediate	0.0748676	0.461513	0	0	0	0	0.263644	0	0	0	0	0.180017	0	0.061184	0	0	0	0	0.0136837	0	0.00642918	0.0135295	0
OCILY1_ADR	OCILY1	ADR	Intermediate	0.0440416	0.552087	0.189578	0	0.0204821	0.00031228	0.080566	0.00380164	0.00708405	0	0	0.0940884	0	0	0.00180528	0	0.0238443	0	0.018392	0	0.0029656	0.00499325	0
OCILY18_ADR	OCILY18	ADR	Intermediate	0.0278064	0.681707	0	0	0.00996694	0	0.153677	0	0	0	0	0.124664	0	0	0	0	0	0	0.0278064	0	0.0021781	0	0
RI1_ADR	RI1	ADR	Intermediate	0.0754255	0.326578	0.459235	0.0557395	0.0421806	0	0	0.00512204	0.0256701	0	0	0	0	0.00531767	0	0	0	0	0.0701078	0	0.00511719	0.00493275	0
SUDHL2_ADR	SUDHL2	ADR	Intermediate	0.0384313	0.174871	0.667172	0	0	0	0	0.0389224	0.0181048	0.00740697	0	0.0484465	0	0.0194818	0.00988452	0	0	0	0.009065	0	0	0.00664542	0
SUDHL4_ADR	SUDHL4	ADR	Intermediate	0.00372855	0.224925	0.628301	0	0.0103807	0	0.0624581	0	0.0278311	0.00518008	0	0.0302359	0	0	0.000522072	0	0.00320648	0	0	0	0.00696015	0	0
TOLEDO_ADR	TOLEDO	ADR	Intermediate	0.0512997	0.406111	0	0	0.0128105	0.0336726	0.293666	0	0	0	0	0.195712	0	0.0245713	0	0	0	0	0.0267284	0	0	0.00672852	0
CARNAVAL_UT	CARNAVAL	UT	Sen_Incomp	0.0322978	0.802018	0	0	0	0	0.0616378	0.0259193	0.00302234	0	0	0.0751047	0	0.0145844	0.00898714	0	0	0	0.00872622	0	0	0	0
DOHH2_UT	DOHH2	UT	Sen_Incomp	0.0600559	0.223433	0.347171	0	0.0102768	0	0.242529	0	0.0020574	0	0	0.11105	0	0.0482683	0.00408248	0	0	0	0.00770514	0	0.0034264	0	0
NUDHL1_UT	NUDHL1	UT	Sen_Incomp	0.0194352	0.518566	0.201766	0	0.055471	0	0.0502833	0.0240555	0.019185	0	0	0.0965477	0	0	0.0184149	0	0.00102034	0	0	0	0	0.0146907	0
OCILY7_UT	OCILY7	UT	Sen_Incomp	0.0321221	0.468925	0.153825	0.176921	0	0	0.048545	0.0266786	0.0357504	0	0	0.0518801	0	0	0	0	0.0192218	0	0.0129003	0	0.00535239	0	0
SUDHL5_UT	SUDHL5	UT	Sen_Incomp	0.0206911	0.783139	0	0	0	0	0.0870288	0.00240625	0.0242276	0	0	0.0806136	0	0	0	0	0.0123104	0	0.00838068	0	0.00189402	0	0
SUDHL6_UT	SUDHL6	UT	Sen_Incomp	0.0204838	0.402689	0.402505	0.0337736	0	0	0.0192634	0.0201735	0.0579907	0	0	0.0431206	0	0	0.00309964	0	0.00271059	0	0.0146736	0	0	0	0
CARNAVAL_ADR	CARNAVAL	ADR	Sen_Incomp	0.0201304	0.843555	0	0	0	0	0.0687962	0.00478727	0.00367578	0	0	0.059055	0	0	0.0111599	0	0	0	0.00897053	0	0	0	0
DOHH2_ADR	DOHH2	ADR	Sen_Incomp	0.0390254	0.23443	0.399486	0	0	0	0.169057	0	0.0144149	0	0	0.141047	0	0.0375195	0	0	0	0	0.00150582	0	0.00253923	0	0
NUDHL1_ADR	NUDHL1	ADR	Sen_Incomp	0.0612098	0.613636	0.0213397	0	0.0736689	0	0.0788388	0.00667711	0.0322222	0	0	0.101751	0	0.0296975	0.014176	0	0.0173364	0	0	0	0	0.0106564	0
OCILY7_ADR	OCILY7	ADR	Sen_Incomp	0.00940895	0.589659	0.0967976	0.22438	0.0307618	0.00569085	0	0.00505596	0.00459684	0	0	0.0336483	0	0.00242927	0.0053003	0	0	0	0.00167938	0	0	0	0
SUDHL5_ADR	SUDHL5	ADR	Sen_Incomp	0.0381139	0.731826	0	0	0	0	0.112361	0.00339289	0.0367089	0	0	0.0775973	0	0.0260144	0.00275991	0	0	0	0.00933957	0	0	0	0
SUDHL6_ADR	SUDHL6	ADR	Sen_Incomp	0.0286193	0.294279	0.571301	0.03075	0	0	0	0.017317	0.0253827	0	0	0.0287887	0	0.00790716	0.00706357	0	0	0	0.0136486	0	0.00356235	0	0
