# Supplementary material for: Senescence-associated lineage-aberrant plasticity evokes T-cell-mediated tumor control
Source: Nat Commun. 2025 Mar 31;16:3079. doi: 10.1038/s41467-025-57429-x (PMC11955568; doi:10.1038/s41467-025-57429-x)
Supplement: Supplementary file 5 — Supplementary Data 3 [file 41467_2025_57429_MOESM5_ESM.xlsx]

## Sheet: Data S3
Supplementary Data 3. Results of differential expression (DE) analysis, related to Figure 7 and Supplementary Fig. 4
See Methods section "RNA-seq and differential gene expression analysis" for details.
DE genes were computed using DESeq2 which models count data with a negative binomial distribution. Significance testing was performed using the Wald test and multiple testing was accounted for by the Benjamini-Hochberg method.
Note that this file contains the following worksheets:
Worksheet	Description
A	Differentially expressed genes by knockdown of PU.1 in TIS
B	Differentially expressed genes by knockdown of C/EBPb in TIS
C	Differentially expressed genes by knockdown of c-Jun in TIS
D	Differentially expressed genes by induction of TIS
E	Differentially expressed genes by knockdown of PU.1 in proliferating lymphomas
F	Differentially expressed genes by knockdown of PU.1 in proliferating Suv39h1-;bcl2 lymphomas
G	Differentially expressed genes by knockdown of PU.1 in TIS-deficient Suv39h1-;bcl2 lymphomas

## Sheet: S3A - DEA, TIS sh_Spi1
Supplementary Data 3A. Differentially expressed genes by knockdown of PU.1 in TIS
Results of DE analysis by DESeq2 encompassing control;bcl2 TIS lymphomas, comparing sh_Spi1 vs sh_ctrll pairs (n = 4).
DESeq2 models count data with a negative binomial distribution. Significance testing was performed using the Wald test
"padj" is the Benjamini-Hochberg adjusted P value.
The gene symbols used for downstream analyses of gene sets are assigned in the "Gene set" column.
Related to Supplementary Fig. 4e,f
Grey font indicates that genes had padj <0.10 but |log2FoldChange| < 0.58, i.e. not considered significant.
SYMBOL	baseMean	log2FoldChange	lfcSE	stat	pvalue	padj (<0.10)	Gene set
Rpl15-ps3	322.507	-10.6009	3.37664	-3.1395	0.00169239	0.0694383	sh_Spi1 TIS DOWN
Gm14548	20.9382	-6.1721	1.41668	-4.35674	1.32011e-05	0.00193032	sh_Spi1 TIS DOWN
Gm15210	27.5938	-4.87599	1.48831	-3.2762	0.00105216	0.0495271	sh_Spi1 TIS DOWN
Wfdc17	515.188	-4.43224	0.717019	-6.18149	6.34996e-10	7.27335e-07	sh_Spi1 TIS DOWN
Ccl22	65.3357	-3.90981	0.973502	-4.01623	5.91369e-05	0.00611155	sh_Spi1 TIS DOWN
Il1b	407.989	-3.50803	0.637281	-5.50469	3.69813e-08	1.88262e-05	sh_Spi1 TIS DOWN
Lrrc32	655.373	-3.43276	0.30071	-11.4155	3.49843e-30	4.80859e-26	sh_Spi1 TIS DOWN
Bcl2a1b	64.3762	-2.97921	0.851856	-3.49732	0.000469966	0.0273715	sh_Spi1 TIS DOWN
Nxpe2	168.403	-2.87949	0.651544	-4.41949	9.8934e-06	0.00154528	sh_Spi1 TIS DOWN
Clec12a	143.24	-2.87103	0.295816	-9.70547	2.85768e-22	1.96394e-18	sh_Spi1 TIS DOWN
Ptafr	93.011	-2.86464	0.609737	-4.69815	2.62525e-06	0.000538569	sh_Spi1 TIS DOWN
Hsd17b14	97.8845	-2.74607	0.794415	-3.45672	0.000546797	0.0302655	sh_Spi1 TIS DOWN
Myo1f	322.658	-2.71449	0.679509	-3.99477	6.4756e-05	0.00659312	sh_Spi1 TIS DOWN
Rnase6	432.955	-2.59596	0.538029	-4.82494	1.40042e-06	0.000326251	sh_Spi1 TIS DOWN
March1	187.208	-2.58911	0.599097	-4.32169	1.54842e-05	0.0021498	sh_Spi1 TIS DOWN
Ccr1	273.759	-2.55794	0.626889	-4.08036	4.49651e-05	0.00510781	sh_Spi1 TIS DOWN
Siglech	24.6024	-2.53345	0.708983	-3.57336	0.00035243	0.0226362	sh_Spi1 TIS DOWN
Lhx2	279.026	-2.46019	0.481303	-5.11152	3.19584e-07	9.98338e-05	sh_Spi1 TIS DOWN
Plek	244.267	-2.42347	0.580268	-4.17647	2.96074e-05	0.00369958	sh_Spi1 TIS DOWN
Sirpa	397.678	-2.37102	0.394081	-6.01659	1.78126e-09	1.53021e-06	sh_Spi1 TIS DOWN
Pira2	90.7399	-2.30893	0.697725	-3.30922	0.000935563	0.0450694	sh_Spi1 TIS DOWN
Fgf2	169.52	-2.25952	0.647514	-3.48953	0.000483867	0.0279443	sh_Spi1 TIS DOWN
Rab30	52.247	-2.24198	0.687782	-3.25972	0.00111521	0.0521379	sh_Spi1 TIS DOWN
Aph1c	65.9989	-2.23851	0.485057	-4.61494	3.93204e-06	0.000750638	sh_Spi1 TIS DOWN
Mpeg1	1536.07	-2.16916	0.411848	-5.26689	1.38753e-07	5.14475e-05	sh_Spi1 TIS DOWN
Cd300ld	189.469	-2.14646	0.618049	-3.47295	0.000514768	0.0291173	sh_Spi1 TIS DOWN
Faim3	865.024	-2.13175	0.453718	-4.69839	2.62222e-06	0.000538569	sh_Spi1 TIS DOWN
Tmem51	317.121	-2.12013	0.675259	-3.13973	0.00169104	0.0694383	sh_Spi1 TIS DOWN
Ctsh	2184.37	-2.09093	0.234784	-8.90575	5.30244e-19	1.82205e-15	sh_Spi1 TIS DOWN
Lrrc25	172.5	-2.04364	0.392716	-5.20386	1.95196e-07	6.70743e-05	sh_Spi1 TIS DOWN
Cd83	348.068	-2.04158	0.348214	-5.86299	4.54593e-09	3.47132e-06	sh_Spi1 TIS DOWN
Gja1	753.115	-1.99759	0.57354	-3.48291	0.000496002	0.0282886	sh_Spi1 TIS DOWN
Ccl6	279.104	-1.98407	0.642339	-3.08883	0.00200949	0.0775854	sh_Spi1 TIS DOWN
Cemip	94.1807	-1.96542	0.647303	-3.03632	0.00239489	0.0872309	sh_Spi1 TIS DOWN
Hck	346.604	-1.94221	0.506763	-3.83258	0.000126807	0.0108259	sh_Spi1 TIS DOWN
Csf2rb2	631.294	-1.90174	0.30324	-6.27139	3.57834e-10	4.4713e-07	sh_Spi1 TIS DOWN
Tyrobp	892.143	-1.89826	0.23755	-7.99096	1.33888e-15	3.06715e-12	sh_Spi1 TIS DOWN
Lamp3	86.3143	-1.89776	0.607174	-3.12556	0.00177464	0.0715549	sh_Spi1 TIS DOWN
Ms4a1	7899.27	-1.83227	0.411282	-4.45502	8.38871e-06	0.00134073	sh_Spi1 TIS DOWN
Apba1	113.394	-1.82876	0.460974	-3.96717	7.27323e-05	0.00714075	sh_Spi1 TIS DOWN
Lcp2	304.443	-1.81013	0.523506	-3.4577	0.000544802	0.0302655	sh_Spi1 TIS DOWN
Cybb	5314.25	-1.79984	0.512445	-3.51225	0.000444326	0.0264384	sh_Spi1 TIS DOWN
Kmo	430.687	-1.7981	0.235588	-7.63238	2.30458e-14	4.52521e-11	sh_Spi1 TIS DOWN
Cacna1f	190.784	-1.76275	0.585568	-3.01033	0.00260966	0.0928653	sh_Spi1 TIS DOWN
AC132444.5	90.4574	-1.73396	0.450012	-3.85314	0.000116614	0.0104037	sh_Spi1 TIS DOWN
Slc15a3	1167.99	-1.7235	0.441941	-3.89985	9.62512e-05	0.008939	sh_Spi1 TIS DOWN
Tbc1d9	127.208	-1.71883	0.504636	-3.40608	0.000659036	0.0352469	sh_Spi1 TIS DOWN
Spi1	3815.55	-1.67796	0.294361	-5.70036	1.19556e-08	7.46955e-06	sh_Spi1 TIS DOWN
H2-DMb2	5083.92	-1.65336	0.318536	-5.19049	2.09738e-07	7.03133e-05	sh_Spi1 TIS DOWN
H2-Aa	24922.7	-1.6424	0.336161	-4.88575	1.03036e-06	0.000262265	sh_Spi1 TIS DOWN
Apof	232.084	-1.61802	0.423996	-3.81613	0.000135563	0.0113085	sh_Spi1 TIS DOWN
H2-DMa	2936.39	-1.59003	0.236864	-6.71283	1.90891e-11	2.6238e-08	sh_Spi1 TIS DOWN
Ccl3	202.56	-1.57695	0.489825	-3.2194	0.00128458	0.0578902	sh_Spi1 TIS DOWN
Cd2	3700.34	-1.56835	0.274484	-5.71381	1.10477e-08	7.23096e-06	sh_Spi1 TIS DOWN
Cd86	777.269	-1.5577	0.218211	-7.13851	9.43504e-13	1.62106e-09	sh_Spi1 TIS DOWN
M1ap	120.967	-1.53794	0.467738	-3.28803	0.00100891	0.0478189	sh_Spi1 TIS DOWN
Scimp	302.622	-1.53319	0.399822	-3.83469	0.000125722	0.0108003	sh_Spi1 TIS DOWN
Renbp	513.552	-1.51817	0.415962	-3.64979	0.000262457	0.0184055	sh_Spi1 TIS DOWN
Cd74	153236	-1.5142	0.363307	-4.16781	3.07539e-05	0.00374081	sh_Spi1 TIS DOWN
H2-Eb1	34014.4	-1.5123	0.294994	-5.12654	2.95122e-07	9.43361e-05	sh_Spi1 TIS DOWN
Atxn1	631.237	-1.49864	0.49563	-3.0237	0.00249707	0.0898486	sh_Spi1 TIS DOWN
Il10ra	1822.05	-1.47576	0.171443	-8.60786	7.44382e-18	2.04631e-14	sh_Spi1 TIS DOWN
AC168977.1	1418.18	-1.47082	0.378316	-3.88781	0.000101152	0.00926886	sh_Spi1 TIS DOWN
H2-Ab1	25190.3	-1.45932	0.273985	-5.32629	1.0024e-07	3.93656e-05	sh_Spi1 TIS DOWN
Alox5ap	589.262	-1.45265	0.214588	-6.76949	1.29236e-11	1.97372e-08	sh_Spi1 TIS DOWN
Fcgr3	2805.69	-1.44766	0.294073	-4.9228	8.53135e-07	0.000221252	sh_Spi1 TIS DOWN
Gm7609	500.171	-1.44731	0.40861	-3.54204	0.000397044	0.0244725	sh_Spi1 TIS DOWN
Csf2rb	3448.08	-1.44664	0.313727	-4.61116	4.00423e-06	0.000753946	sh_Spi1 TIS DOWN
Bcl3	432.626	-1.43158	0.257112	-5.56791	2.57816e-08	1.41747e-05	sh_Spi1 TIS DOWN
Cdh17	1819.91	-1.42953	0.1569	-9.11111	8.15449e-20	3.73611e-16	sh_Spi1 TIS DOWN
Adam19	1830.83	-1.42201	0.340787	-4.17273	3.00971e-05	0.00372688	sh_Spi1 TIS DOWN
Fcrl5	192.845	-1.41792	0.363302	-3.90287	9.50571e-05	0.008939	sh_Spi1 TIS DOWN
Ciita	3608.44	-1.37287	0.267327	-5.13555	2.81326e-07	9.20672e-05	sh_Spi1 TIS DOWN
Nt5e	829.668	-1.34568	0.295369	-4.55593	5.21532e-06	0.000930968	sh_Spi1 TIS DOWN
Kctd14	298.96	-1.34359	0.299483	-4.48636	7.24499e-06	0.0011855	sh_Spi1 TIS DOWN
Plxnc1	1042.3	-1.33015	0.400727	-3.31934	0.000902297	0.0442931	sh_Spi1 TIS DOWN
H2-DMb1	1465.08	-1.32502	0.288787	-4.58823	4.47014e-06	0.000830298	sh_Spi1 TIS DOWN
Nlrp3	379.06	-1.31762	0.299236	-4.40328	1.06625e-05	0.00164669	sh_Spi1 TIS DOWN
Coro2a	486.165	-1.30808	0.259574	-5.03932	4.67192e-07	0.000139599	sh_Spi1 TIS DOWN
AC133103.1	1056.99	-1.29334	0.316387	-4.08783	4.35422e-05	0.0050293	sh_Spi1 TIS DOWN
Hpse	1294.17	-1.2933	0.244792	-5.28325	1.26914e-07	4.84564e-05	sh_Spi1 TIS DOWN
Cul7	234.822	-1.29188	0.3361	-3.84375	0.000121168	0.010608	sh_Spi1 TIS DOWN
Sla	1576.11	-1.27867	0.302326	-4.22943	2.34281e-05	0.00306685	sh_Spi1 TIS DOWN
Lmo2	906.138	-1.26624	0.273709	-4.62622	3.72392e-06	0.000738978	sh_Spi1 TIS DOWN
Sh2b2	1096.48	-1.26401	0.390672	-3.23547	0.00121442	0.0558268	sh_Spi1 TIS DOWN
Bcar3	3163.39	-1.26322	0.34684	-3.64208	0.000270439	0.0185859	sh_Spi1 TIS DOWN
Gm2427	692.615	-1.2281	0.253146	-4.85135	1.22621e-06	0.000295688	sh_Spi1 TIS DOWN
Cmpk2	267.582	-1.22362	0.3435	-3.56223	0.000367725	0.0233136	sh_Spi1 TIS DOWN
Mad2l1	1655.28	-1.2022	0.27978	-4.29696	1.73157e-05	0.00238005	sh_Spi1 TIS DOWN
Rcan2	207.859	-1.18382	0.289774	-4.08533	4.40143e-05	0.00504147	sh_Spi1 TIS DOWN
Pla2g7	374.373	-1.18038	0.253558	-4.65527	3.23561e-06	0.000654022	sh_Spi1 TIS DOWN
Itgb7	1785.9	-1.16988	0.301476	-3.88049	0.000104248	0.00942946	sh_Spi1 TIS DOWN
Pld4	14314.3	-1.16528	0.205249	-5.67739	1.36764e-08	8.17312e-06	sh_Spi1 TIS DOWN
Themis2	1509.82	-1.16205	0.188499	-6.16476	7.05914e-10	7.46369e-07	sh_Spi1 TIS DOWN
Gm6264	750.394	-1.15511	0.219506	-5.26234	1.42234e-07	5.14475e-05	sh_Spi1 TIS DOWN
Mvb12b	506.681	-1.14775	0.23212	-4.94466	7.6277e-07	0.000205574	sh_Spi1 TIS DOWN
Gm6377	147.209	-1.14455	0.343392	-3.33309	0.000858881	0.0429284	sh_Spi1 TIS DOWN
Antxr1	314.563	-1.13567	0.307572	-3.69238	0.000222165	0.0159523	sh_Spi1 TIS DOWN
Plac8	21892.8	-1.12992	0.209703	-5.38821	7.1161e-08	2.96593e-05	sh_Spi1 TIS DOWN
Slc37a2	968.897	-1.11653	0.363646	-3.07038	0.00213785	0.0806135	sh_Spi1 TIS DOWN
Cd68	618.492	-1.10091	0.238236	-4.62109	3.8172e-06	0.000738978	sh_Spi1 TIS DOWN
Sgk3	447.306	-1.09411	0.316583	-3.45599	0.000548281	0.0302655	sh_Spi1 TIS DOWN
Mob3b	247.21	-1.0883	0.351083	-3.09984	0.00193628	0.0756083	sh_Spi1 TIS DOWN
Vpreb3	6920.86	-1.08541	0.276051	-3.93192	8.42693e-05	0.00821477	sh_Spi1 TIS DOWN
Rasgrp1	1871.32	-1.0847	0.287293	-3.7756	0.000159626	0.0126838	sh_Spi1 TIS DOWN
Prkcb	650.97	-1.07481	0.241719	-4.44652	8.72714e-06	0.00137879	sh_Spi1 TIS DOWN
Cd52	4125.92	-1.06552	0.175834	-6.05981	1.36282e-09	1.338e-06	sh_Spi1 TIS DOWN
Tlr2	353.683	-1.05762	0.221659	-4.77138	1.82971e-06	0.000419156	sh_Spi1 TIS DOWN
Ms4a6c	880.735	-1.05692	0.276289	-3.82542	0.000130549	0.0110438	sh_Spi1 TIS DOWN
Oas2	417.629	-1.05007	0.287534	-3.65198	0.00026023	0.0183429	sh_Spi1 TIS DOWN
Pik3r5	742.874	-1.0499	0.194595	-5.39532	6.84026e-08	2.96593e-05	sh_Spi1 TIS DOWN
Epsti1	1167.95	-1.04108	0.294736	-3.53223	0.000412065	0.0251249	sh_Spi1 TIS DOWN
Ly6a	3667.24	-1.03615	0.296202	-3.49814	0.000468521	0.0273715	sh_Spi1 TIS DOWN
Haao	787.789	-1.03603	0.323388	-3.20367	0.0013569	0.0590208	sh_Spi1 TIS DOWN
Lpxn	2391.06	-1.03359	0.287562	-3.59433	0.000325226	0.0217277	sh_Spi1 TIS DOWN
Ctss	12177.6	-1.03217	0.264568	-3.90133	9.56665e-05	0.008939	sh_Spi1 TIS DOWN
Slfn2	2117.38	-1.02829	0.309209	-3.32556	0.000882416	0.0437863	sh_Spi1 TIS DOWN
Rac2	21345.5	-1.02734	0.305516	-3.36266	0.000771967	0.0393097	sh_Spi1 TIS DOWN
Plb1	1455.32	-1.02617	0.337591	-3.03968	0.00236829	0.0868056	sh_Spi1 TIS DOWN
Tnfaip8l2	1284.74	-1.02556	0.249448	-4.1113	3.9343e-05	0.00462196	sh_Spi1 TIS DOWN
Pik3ap1	4062.93	-1.02171	0.224729	-4.54642	5.45672e-06	0.0009494	sh_Spi1 TIS DOWN
Rtp4	191.621	-1.02087	0.308994	-3.30384	0.000953687	0.0455154	sh_Spi1 TIS DOWN
Lacc1	1117.66	-1.01	0.312677	-3.23018	0.00123712	0.0565256	sh_Spi1 TIS DOWN
Armcx2	191.626	-1.00852	0.297951	-3.38484	0.000712186	0.0370795	sh_Spi1 TIS DOWN
Tonsl	914.984	-1.00161	0.289466	-3.46019	0.000539792	0.0301604	sh_Spi1 TIS DOWN
Ly6e	42231	-1.00075	0.20123	-4.97314	6.58776e-07	0.000181097	sh_Spi1 TIS DOWN
Ifi27l2a	1971.44	-0.989327	0.218458	-4.52867	5.9355e-06	0.0010072	sh_Spi1 TIS DOWN
Acot1	236.48	-0.988865	0.286357	-3.45325	0.000553866	0.0304072	sh_Spi1 TIS DOWN
Tlr9	2121.95	-0.982694	0.255883	-3.84041	0.000122831	0.0106183	sh_Spi1 TIS DOWN
Ly6d	1767.61	-0.982004	0.296807	-3.30856	0.000937785	0.0450694	sh_Spi1 TIS DOWN
Cd180	3257.92	-0.96099	0.246391	-3.90026	9.60891e-05	0.008939	sh_Spi1 TIS DOWN
Rasgrp3	407.97	-0.960289	0.290198	-3.30908	0.000936032	0.0450694	sh_Spi1 TIS DOWN
Chst10	399.301	-0.960076	0.259173	-3.70439	0.000211902	0.0154902	sh_Spi1 TIS DOWN
Cyp51	2565.53	-0.946226	0.162553	-5.82103	5.84854e-09	4.23096e-06	sh_Spi1 TIS DOWN
Ckb	9082.36	-0.938667	0.240409	-3.90446	9.44374e-05	0.008939	sh_Spi1 TIS DOWN
Slc28a2	2204.1	-0.929495	0.276423	-3.36258	0.000772181	0.0393097	sh_Spi1 TIS DOWN
Csprs	1658.75	-0.921886	0.259269	-3.55571	0.000376963	0.0234451	sh_Spi1 TIS DOWN
Tagap	635.114	-0.919291	0.229513	-4.0054	6.19113e-05	0.00635053	sh_Spi1 TIS DOWN
A530032D15Rik	1644.71	-0.917623	0.216539	-4.23769	2.25833e-05	0.00298468	sh_Spi1 TIS DOWN
Hivep1	2525.99	-0.912564	0.253913	-3.594	0.000325639	0.0217277	sh_Spi1 TIS DOWN
Dusp5	5805.37	-0.908717	0.277172	-3.27853	0.00104347	0.0492871	sh_Spi1 TIS DOWN
Dnase2a	2403.61	-0.900902	0.180132	-5.00134	5.69347e-07	0.000159708	sh_Spi1 TIS DOWN
Dusp10	559.057	-0.900193	0.299695	-3.0037	0.00266719	0.0935216	sh_Spi1 TIS DOWN
B4galnt1	3094.59	-0.897719	0.159615	-5.62426	1.86301e-08	1.06696e-05	sh_Spi1 TIS DOWN
Suox	459.01	-0.896875	0.206673	-4.33958	1.42757e-05	0.00204395	sh_Spi1 TIS DOWN
Gm18342	615.017	-0.880711	0.212398	-4.14652	3.37573e-05	0.00399995	sh_Spi1 TIS DOWN
Trex1	1416.75	-0.876505	0.230821	-3.79734	0.000146259	0.0118873	sh_Spi1 TIS DOWN
1700021K19Rik	3967.92	-0.872771	0.199624	-4.37208	1.23066e-05	0.00181887	sh_Spi1 TIS DOWN
Tmsb4x	32249.8	-0.872655	0.173877	-5.0188	5.19958e-07	0.000150967	sh_Spi1 TIS DOWN
Sp140	8274.14	-0.872508	0.201331	-4.33371	1.46619e-05	0.0020776	sh_Spi1 TIS DOWN
Ptdss2	1129.43	-0.86996	0.206245	-4.21809	2.46385e-05	0.00316501	sh_Spi1 TIS DOWN
Mgat4a	2120.45	-0.851546	0.277378	-3.06998	0.0021407	0.0806135	sh_Spi1 TIS DOWN
Dennd1a	3774.02	-0.838908	0.224386	-3.73869	0.000184983	0.0139703	sh_Spi1 TIS DOWN
Itgam	1603.65	-0.837167	0.23348	-3.58561	0.000336291	0.0221164	sh_Spi1 TIS DOWN
Stk17b	8691.67	-0.834403	0.209772	-3.97767	6.95944e-05	0.0069317	sh_Spi1 TIS DOWN
Ptprc	12309.3	-0.831911	0.170628	-4.87557	1.08493e-06	0.000266291	sh_Spi1 TIS DOWN
Il6ra	3475.16	-0.814832	0.147479	-5.52507	3.29351e-08	1.74112e-05	sh_Spi1 TIS DOWN
Tgfb1	2629.74	-0.808408	0.211898	-3.81508	0.000136137	0.0113085	sh_Spi1 TIS DOWN
H2-Oa	1629.85	-0.804733	0.220717	-3.64599	0.000266361	0.0184906	sh_Spi1 TIS DOWN
Kcnk6	328.866	-0.804022	0.248922	-3.23001	0.00123785	0.0565256	sh_Spi1 TIS DOWN
Hvcn1	9150.71	-0.801906	0.197438	-4.06156	4.87453e-05	0.00536004	sh_Spi1 TIS DOWN
Cd300a	1168.2	-0.79799	0.2118	-3.76766	0.000164783	0.0129426	sh_Spi1 TIS DOWN
Itgb2	4677.69	-0.796905	0.161787	-4.92564	8.40858e-07	0.000221252	sh_Spi1 TIS DOWN
Srxn1	416.884	-0.79243	0.244417	-3.24212	0.00118644	0.0550933	sh_Spi1 TIS DOWN
AB124611	2959.47	-0.786302	0.149786	-5.24949	1.52521e-07	5.37539e-05	sh_Spi1 TIS DOWN
Rdh12	980.475	-0.782784	0.174887	-4.47594	7.60751e-06	0.00123018	sh_Spi1 TIS DOWN
Evi2a	1328.6	-0.782337	0.200099	-3.90976	9.23878e-05	0.00888021	sh_Spi1 TIS DOWN
Zfp385a	4415.97	-0.781811	0.222762	-3.50962	0.000448747	0.0265863	sh_Spi1 TIS DOWN
Gpr137b-ps	483.366	-0.781516	0.262407	-2.97826	0.00289889	0.0981391	sh_Spi1 TIS DOWN
Oasl1	837.921	-0.774416	0.223219	-3.46931	0.000521799	0.029394	sh_Spi1 TIS DOWN
Sh3bgrl3	7869.42	-0.772164	0.163025	-4.73648	2.17459e-06	0.00047444	sh_Spi1 TIS DOWN
Lyn	7177.99	-0.770742	0.185237	-4.16083	3.17089e-05	0.0037899	sh_Spi1 TIS DOWN
Slamf9	2413.66	-0.770524	0.217994	-3.53461	0.000408382	0.025059	sh_Spi1 TIS DOWN
Sp100	8216.32	-0.753801	0.199652	-3.77557	0.000159643	0.0126838	sh_Spi1 TIS DOWN
Cotl1	13635.9	-0.752821	0.251663	-2.99138	0.00277717	0.0953479	sh_Spi1 TIS DOWN
Pde4a	1820.54	-0.748941	0.157771	-4.74702	2.06433e-06	0.000465151	sh_Spi1 TIS DOWN
Lgmn	50832.1	-0.747569	0.138883	-5.38273	7.3366e-08	2.96593e-05	sh_Spi1 TIS DOWN
Icam1	4812.24	-0.740951	0.198977	-3.72381	0.000196237	0.0145015	sh_Spi1 TIS DOWN
Man1a2	4801.57	-0.736355	0.198628	-3.7072	0.000209565	0.0154036	sh_Spi1 TIS DOWN
Ly86	7282.93	-0.73448	0.16697	-4.39887	1.08816e-05	0.00166187	sh_Spi1 TIS DOWN
Pmaip1	4025.73	-0.732694	0.217389	-3.37043	0.000750507	0.0384915	sh_Spi1 TIS DOWN
Syk	18426.2	-0.726971	0.191507	-3.79604	0.000147024	0.0118873	sh_Spi1 TIS DOWN
Sh2d3c	4685.15	-0.719655	0.222073	-3.24062	0.0011927	0.0551976	sh_Spi1 TIS DOWN
Txndc16	4413.23	-0.716397	0.157677	-4.54343	5.53451e-06	0.000950897	sh_Spi1 TIS DOWN
Acox3	3914.39	-0.710111	0.188708	-3.76302	0.000167872	0.0131102	sh_Spi1 TIS DOWN
Gm2a	4423.22	-0.706188	0.20454	-3.45257	0.000555271	0.0304072	sh_Spi1 TIS DOWN
Micu1	1664.89	-0.704033	0.160642	-4.38263	1.17257e-05	0.0017711	sh_Spi1 TIS DOWN
Coro1a	28258.4	-0.702679	0.218758	-3.21214	0.00131752	0.0586293	sh_Spi1 TIS DOWN
Napsa	14900.6	-0.70063	0.172292	-4.06652	4.77207e-05	0.00528969	sh_Spi1 TIS DOWN
Rhof	1376.55	-0.687937	0.163321	-4.21218	2.52923e-05	0.00321891	sh_Spi1 TIS DOWN
Ptger4	544.826	-0.687729	0.184682	-3.72386	0.0001962	0.0145015	sh_Spi1 TIS DOWN
Atp6v0a1	2640.24	-0.68603	0.179858	-3.81429	0.000136574	0.0113085	sh_Spi1 TIS DOWN
Samhd1	17158.4	-0.684999	0.220474	-3.10695	0.00189031	0.0750935	sh_Spi1 TIS DOWN
Ccr7	5455.79	-0.683648	0.192169	-3.55754	0.000374344	0.0234305	sh_Spi1 TIS DOWN
Hepacam2	5540.56	-0.682911	0.16872	-4.04761	5.1744e-05	0.00560017	sh_Spi1 TIS DOWN
Btg1	8336.59	-0.680766	0.171086	-3.97909	6.91789e-05	0.0069317	sh_Spi1 TIS DOWN
Calhm2	682.555	-0.665174	0.215224	-3.09062	0.00199741	0.0773363	sh_Spi1 TIS DOWN
Tmem229b	13866.1	-0.663638	0.216654	-3.06313	0.00219036	0.081369	sh_Spi1 TIS DOWN
Golm1	1027.54	-0.660092	0.221145	-2.98488	0.00283688	0.0967565	sh_Spi1 TIS DOWN
Man2b1	8519.84	-0.657665	0.139653	-4.70929	2.48582e-06	0.000525656	sh_Spi1 TIS DOWN
Gns	20792.6	-0.656561	0.145308	-4.51841	6.23045e-06	0.00104436	sh_Spi1 TIS DOWN
Tln1	18398.1	-0.653471	0.19228	-3.39853	0.000677478	0.0359534	sh_Spi1 TIS DOWN
Plxnb2	26747.5	-0.653437	0.189937	-3.44028	0.000581114	0.0313232	sh_Spi1 TIS DOWN
Card11	4258.77	-0.653289	0.204229	-3.1988	0.00138	0.0596481	sh_Spi1 TIS DOWN
Gpr155	1484.82	-0.652799	0.182606	-3.57491	0.000350347	0.0226081	sh_Spi1 TIS DOWN
Tor3a	2837.84	-0.650841	0.203732	-3.19459	0.0014003	0.0602054	sh_Spi1 TIS DOWN
Pdxk	3751.63	-0.647566	0.173088	-3.74125	0.000183105	0.0139049	sh_Spi1 TIS DOWN
Cd82	978.748	-0.647255	0.180354	-3.5888	0.000332202	0.0219525	sh_Spi1 TIS DOWN
Fcrla	10855.7	-0.645878	0.21071	-3.06525	0.00217489	0.0812332	sh_Spi1 TIS DOWN
Chd9	58370.5	-0.639629	0.170799	-3.74493	0.000180447	0.0139049	sh_Spi1 TIS DOWN
Shisa5	9252.41	-0.638194	0.189296	-3.37141	0.000747854	0.0384915	sh_Spi1 TIS DOWN
Scpep1	5190.69	-0.637398	0.192002	-3.31975	0.000900992	0.0442931	sh_Spi1 TIS DOWN
Tpm4	4286.99	-0.635146	0.155885	-4.07445	4.61223e-05	0.00515407	sh_Spi1 TIS DOWN
Elovl5	2410.34	-0.635026	0.195561	-3.24721	0.00116543	0.0543013	sh_Spi1 TIS DOWN
Capg	3711.75	-0.6331	0.163864	-3.86356	0.000111747	0.010039	sh_Spi1 TIS DOWN
Cep83	3158.53	-0.631254	0.170969	-3.69221	0.000222315	0.0159523	sh_Spi1 TIS DOWN
Tubb2b	8433.6	-0.622953	0.164744	-3.78134	0.000155985	0.0125381	sh_Spi1 TIS DOWN
Tceanc2	2135.37	-0.622663	0.170842	-3.64466	0.000267741	0.018493	sh_Spi1 TIS DOWN
Smc6	5402.14	-0.619741	0.182769	-3.39085	0.000696767	0.0367931	sh_Spi1 TIS DOWN
Parp14	2170.21	-0.617124	0.192129	-3.21202	0.00131804	0.0586293	sh_Spi1 TIS DOWN
Fmnl3	1216.84	-0.616131	0.204056	-3.01942	0.0025326	0.0908894	sh_Spi1 TIS DOWN
Emb	2123.99	-0.598434	0.199942	-2.99304	0.00276216	0.0951525	sh_Spi1 TIS DOWN
Mgat1	6937.07	-0.591233	0.173905	-3.39976	0.000674462	0.0359321	sh_Spi1 TIS DOWN
Swap70	4886.81	-0.585222	0.13532	-4.32474	1.5271e-05	0.00214184	sh_Spi1 TIS DOWN
Ppp2r4	16968.2	-0.581765	0.180892	-3.21609	0.00129948	0.0581804	sh_Spi1 TIS DOWN
Zfp709	545.841	-0.580196	0.180981	-3.20585	0.00134666	0.0589157	sh_Spi1 TIS DOWN
Cxcr4	8983.35	-0.579602	0.122517	-4.7308	2.23637e-06	0.000480296
Hexb	1344.02	-0.571204	0.189875	-3.00832	0.00262695	0.0930602
N4bp3	2052.12	-0.570477	0.166903	-3.41801	0.000630805	0.0338688
Pla2g15	1206.64	-0.567189	0.154396	-3.6736	0.000239158	0.0169445
Vps18	2392.74	-0.565648	0.138697	-4.0783	4.53671e-05	0.00511123
Fmnl1	9847.19	-0.563642	0.13992	-4.0283	5.61807e-05	0.00585911
Cbl	6418.08	-0.562044	0.16064	-3.49878	0.000467386	0.0273715
Acy1	2400.96	-0.561944	0.187039	-3.00442	0.00266091	0.0935216
Cyb561d2	799.706	-0.561683	0.179324	-3.13223	0.00173486	0.0707585
Erp29	13532.4	-0.560657	0.159074	-3.5245	0.000424281	0.0253554
Cd79b	39781.1	-0.558935	0.168498	-3.31716	0.000909387	0.0444823
Sema4b	6374.79	-0.558032	0.144881	-3.85166	0.000117321	0.0104037
Gpx1	18768.4	-0.556988	0.168137	-3.3127	0.000923996	0.0448935
Rnh1	4351	-0.554655	0.153229	-3.61976	0.000294871	0.0201642
Asnsd1	4909.02	-0.553268	0.149407	-3.70308	0.000212997	0.0154902
Zfp703	1698.57	-0.551051	0.177646	-3.10196	0.00192242	0.0753323
Limd2	6656.58	-0.550488	0.122603	-4.48998	7.12288e-06	0.00117957
Gm9625	8710.38	-0.546971	0.155037	-3.528	0.000418718	0.0251322
Krt222	643.964	-0.546342	0.168789	-3.23684	0.00120861	0.0557463
Glipr2	2441.75	-0.545397	0.156505	-3.48486	0.0004924	0.0282002
Vamp8	2354.18	-0.544774	0.128319	-4.24548	2.18128e-05	0.00291084
mt-Nd4l	8477.08	-0.543447	0.17021	-3.19281	0.00140894	0.0603298
Hsd17b11	1720.9	-0.539866	0.163246	-3.30708	0.000942746	0.04515
Slc9a1	1586.88	-0.539694	0.161539	-3.34095	0.000834911	0.0420361
Grn	23991.1	-0.530071	0.140645	-3.76887	0.000163991	0.0129426
Skap2	3166.91	-0.529563	0.171059	-3.09579	0.00196292	0.0764316
Rel	2660.32	-0.517947	0.154321	-3.3563	0.000789919	0.0399171
Pgpep1	3776.1	-0.517508	0.135871	-3.80882	0.000139632	0.0114924
Aldh9a1	6926.84	-0.51748	0.136157	-3.80062	0.000144336	0.0118089
Smap2	7520.91	-0.515607	0.167419	-3.07975	0.00207175	0.0793211
S100a10	10163.5	-0.501326	0.119812	-4.18427	2.8608e-05	0.00360749
Cyba	11290.6	-0.492428	0.162559	-3.02922	0.0024519	0.088455
Asah1	2644.31	-0.49211	0.141978	-3.4661	0.000528063	0.0296254
Gm8730	32689.2	-0.489022	0.163681	-2.98765	0.00281131	0.0961231
Slc27a4	959.345	-0.487738	0.158669	-3.07393	0.00211262	0.0802152
Ppp1r18	3993.47	-0.486374	0.137722	-3.53156	0.000413112	0.0251249
Nfkbid	1356.44	-0.475609	0.158567	-2.99943	0.00270485	0.0940484
Cd37	18293.4	-0.475208	0.148087	-3.20898	0.00133205	0.0589157
Ier5	7999.84	-0.47302	0.132739	-3.56354	0.000365881	0.0233136
Myo1e	6037.7	-0.469378	0.131956	-3.55706	0.000375024	0.0234305
Gng10	1528.52	-0.464101	0.149011	-3.11455	0.00184227	0.0738251
Sp110	10734.8	-0.460913	0.144831	-3.18242	0.00146051	0.062344
Stx7	4836.16	-0.459418	0.14334	-3.20509	0.0013502	0.0589157
Ptprj	11611.1	-0.458941	0.135632	-3.38371	0.000715132	0.0370924
9130401M01Rik	1303.67	-0.44637	0.149924	-2.97731	0.00290789	0.0981391
Mapre2	2069.73	-0.439204	0.147362	-2.98044	0.00287836	0.0976865
Cd48	2912.4	-0.429085	0.140521	-3.05352	0.00226171	0.0833498
Neurl3	3347.72	-0.424053	0.133586	-3.17439	0.00150152	0.0636989
Chchd10	5302.42	-0.422546	0.125823	-3.35826	0.000784337	0.0397812
Parvg	12870.4	-0.420058	0.139846	-3.00372	0.00266698	0.0935216
H2-T23	9653.07	-0.412247	0.13401	-3.07624	0.00209629	0.0799977
Scarb2	5613.44	-0.399916	0.128635	-3.10891	0.00187778	0.0748117
Dennd5a	6369.38	-0.387741	0.125791	-3.08242	0.00205322	0.078831
Irf8	8347	-0.3871	0.122381	-3.16307	0.00156116	0.0656211
Arpc1b	19241.1	-0.384055	0.123519	-3.10927	0.00187547	0.0748117
Dcaf8	12161.2	0.45713	0.14934	3.061	0.002206	0.0817292
Gclc	6402.54	0.487101	0.134735	3.61526	0.000300051	0.0203163
Msi2	4114.85	0.502057	0.160442	3.12921	0.00175279	0.0712786
Ccdc116	1044.73	0.511586	0.153766	3.32704	0.000877748	0.0437125
Numb	1159.12	0.527939	0.175727	3.00432	0.00266176	0.0935216
Map3k15	2446.35	0.535526	0.163915	3.2671	0.00108655	0.0509716
Cnst	1626.42	0.541736	0.150146	3.60806	0.000308494	0.0207855
Mbtd1	5565.2	0.54461	0.169807	3.20722	0.00134023	0.0589157
Zfp395	3919.12	0.54812	0.152631	3.59115	0.000329222	0.0218607
Prpf3	3271.5	0.569224	0.168759	3.37299	0.000743554	0.0384216
Aldh6a1	1016.95	0.579937	0.19359	2.99569	0.00273823	0.0948035
Rbmx	1275.67	0.610469	0.146597	4.16426	3.1237e-05	0.00376625	sh_Spi1 TIS UP
Nktr	5821.61	0.613488	0.15204	4.03504	5.45925e-05	0.0057721	sh_Spi1 TIS UP
Sgk1	2097.22	0.623591	0.180921	3.44676	0.000567354	0.0307019	sh_Spi1 TIS UP
Fech	1816.39	0.626113	0.197875	3.16419	0.00155517	0.06557	sh_Spi1 TIS UP
Lpar6	631.507	0.6264	0.173207	3.61647	0.000298644	0.0203163	sh_Spi1 TIS UP
3110057O12Rik	340.33	0.63071	0.198515	3.17714	0.00148737	0.0632938	sh_Spi1 TIS UP
Thra	1613.93	0.633551	0.20866	3.03629	0.00239511	0.0872309	sh_Spi1 TIS UP
Clec2i	3029.66	0.633596	0.197682	3.20512	0.00135006	0.0589157	sh_Spi1 TIS UP
Trmt10a	924.453	0.633625	0.202729	3.12547	0.00177521	0.0715549	sh_Spi1 TIS UP
Cbfa2t2	2049.34	0.634846	0.181804	3.49192	0.000479565	0.0278127	sh_Spi1 TIS UP
Arvcf	1636.08	0.636591	0.155075	4.10506	4.04205e-05	0.00470831	sh_Spi1 TIS UP
Tef	5085.21	0.645285	0.148555	4.34376	1.40066e-05	0.00202653	sh_Spi1 TIS UP
Mphosph9	1280.55	0.660543	0.220681	2.9932	0.00276068	0.0951525	sh_Spi1 TIS UP
Zfp280c	1008.98	0.660645	0.221531	2.98217	0.00286208	0.0973746	sh_Spi1 TIS UP
Hmgxb4	1278.31	0.672141	0.220657	3.04608	0.00231842	0.0852052	sh_Spi1 TIS UP
Ankrd39	540.496	0.68412	0.217774	3.14143	0.00168127	0.0694383	sh_Spi1 TIS UP
Mturn	3275.88	0.69938	0.206508	3.3867	0.000707389	0.0369698	sh_Spi1 TIS UP
Ppt2	591.575	0.704473	0.218815	3.2195	0.00128415	0.0578902	sh_Spi1 TIS UP
Plekhg1	385.567	0.709707	0.234235	3.02989	0.00244642	0.088455	sh_Spi1 TIS UP
Hspa4l	777.165	0.712855	0.216142	3.29809	0.000973459	0.0462983	sh_Spi1 TIS UP
Gfi1	1639.76	0.716697	0.177931	4.02794	5.62679e-05	0.00585911	sh_Spi1 TIS UP
S100pbp	1550.94	0.727357	0.236688	3.07306	0.00211877	0.0802272	sh_Spi1 TIS UP
Jade3	660.015	0.730433	0.211757	3.4494	0.000561839	0.030597	sh_Spi1 TIS UP
Pak1	930.924	0.740919	0.247726	2.99088	0.0027817	0.0953479	sh_Spi1 TIS UP
Mapk12	612.257	0.750742	0.199593	3.76136	0.000168992	0.0131231	sh_Spi1 TIS UP
Pcmtd2	1627.1	0.757148	0.234502	3.22874	0.00124336	0.0565895	sh_Spi1 TIS UP
Itih5	1617.95	0.772146	0.252074	3.06317	0.00219003	0.081369	sh_Spi1 TIS UP
Primpol	970.568	0.780276	0.242518	3.21739	0.00129361	0.0581068	sh_Spi1 TIS UP
Hdac11	1188.42	0.780947	0.244083	3.19952	0.00137659	0.0596481	sh_Spi1 TIS UP
Trib2	6790.54	0.787708	0.205957	3.82463	0.000130967	0.0110438	sh_Spi1 TIS UP
Cacna1e	1643.94	0.805891	0.199442	4.04074	5.32835e-05	0.00572173	sh_Spi1 TIS UP
Fam60a	4362.58	0.854917	0.272265	3.14002	0.00168934	0.0694383	sh_Spi1 TIS UP
Nyx	4649.23	0.860774	0.188855	4.55785	5.16804e-06	0.000930968	sh_Spi1 TIS UP
Pitpnc1	1071.03	0.87346	0.227411	3.84088	0.000122593	0.0106183	sh_Spi1 TIS UP
Cep89	993.446	0.878669	0.249045	3.52816	0.000418463	0.0251322	sh_Spi1 TIS UP
Lzts2	2734.64	0.88122	0.224674	3.92222	8.77359e-05	0.00849247	sh_Spi1 TIS UP
Nudt13	416.777	0.902872	0.223701	4.03606	5.43554e-05	0.0057721	sh_Spi1 TIS UP
Rrm2b	2224.14	0.908893	0.25386	3.58029	0.000343207	0.0222518	sh_Spi1 TIS UP
Pam	369.114	0.912073	0.234049	3.89693	9.74218e-05	0.00898699	sh_Spi1 TIS UP
Prdm15	1995.77	0.937019	0.28224	3.31994	0.000900358	0.0442931	sh_Spi1 TIS UP
Kat2b	597.45	0.938668	0.292799	3.20584	0.00134668	0.0589157	sh_Spi1 TIS UP
3830406C13Rik	272.895	0.940986	0.252566	3.7257	0.000194773	0.0145015	sh_Spi1 TIS UP
Rab25	277.776	0.942463	0.267037	3.52933	0.000416609	0.0251322	sh_Spi1 TIS UP
Sh3bp5l	1847.78	0.949597	0.187839	5.05537	4.29549e-07	0.000131203	sh_Spi1 TIS UP
Pear1	3729.32	0.956202	0.29669	3.2229	0.001269	0.0575657	sh_Spi1 TIS UP
Rccd1	688.406	0.95817	0.207295	4.62226	3.79579e-06	0.000738978	sh_Spi1 TIS UP
Yipf1	1734.08	0.962638	0.178287	5.39937	6.6876e-08	2.96593e-05	sh_Spi1 TIS UP
Crim1	719.833	0.981818	0.317627	3.09111	0.00199412	0.0773363	sh_Spi1 TIS UP
Pde2a	4272.03	0.985035	0.319151	3.08642	0.00202581	0.0779967	sh_Spi1 TIS UP
Rapgef3	2155.93	0.990129	0.257216	3.84941	0.000118401	0.0104322	sh_Spi1 TIS UP
Carns1	601.321	0.995023	0.245606	4.05129	5.09351e-05	0.00555637	sh_Spi1 TIS UP
Pcsk7	1939.01	0.997256	0.182426	5.46662	4.58701e-08	2.25173e-05	sh_Spi1 TIS UP
Zbtb26	444.913	1.0238	0.340161	3.00974	0.00261469	0.0928653	sh_Spi1 TIS UP
Endou	2378.03	1.03783	0.29847	3.47715	0.000506766	0.0287831	sh_Spi1 TIS UP
Tmtc4	618.867	1.06543	0.338395	3.14847	0.00164129	0.0685699	sh_Spi1 TIS UP
Glt8d1	916.044	1.06827	0.309756	3.44875	0.000563189	0.030597	sh_Spi1 TIS UP
Inpp4a	356.256	1.10907	0.26032	4.26042	2.0404e-05	0.00274954	sh_Spi1 TIS UP
Acvr2b	368.999	1.10975	0.360829	3.07556	0.00210107	0.0799977	sh_Spi1 TIS UP
AI846148	587.453	1.12287	0.357822	3.13806	0.00170069	0.0695716	sh_Spi1 TIS UP
Pnpla6	1910.93	1.12922	0.309509	3.64841	0.000263866	0.0184103	sh_Spi1 TIS UP
Dnah1	395.846	1.14181	0.27393	4.16823	3.06969e-05	0.00374081	sh_Spi1 TIS UP
Zfp763	203.188	1.15515	0.308673	3.74231	0.000182337	0.0139049	sh_Spi1 TIS UP
Cth	402.702	1.19831	0.336416	3.56198	0.000368066	0.0233136	sh_Spi1 TIS UP
Huwe1	44983.1	1.199	0.399519	3.00111	0.00268994	0.0938406	sh_Spi1 TIS UP
Tmem136	91.747	1.22395	0.41117	2.97676	0.00291311	0.0981391	sh_Spi1 TIS UP
Enah	245.839	1.23099	0.390052	3.15596	0.00159973	0.0670375	sh_Spi1 TIS UP
Clic5	152.394	1.23376	0.402168	3.06776	0.0021567	0.0809942	sh_Spi1 TIS UP
Gm8898	278.815	1.25999	0.394447	3.19431	0.00140165	0.0602054	sh_Spi1 TIS UP
Ppp1r26	199.833	1.26457	0.362617	3.48735	0.000487836	0.0280557	sh_Spi1 TIS UP
Sec14l2	172.429	1.2865	0.388366	3.3126	0.000924326	0.0448935	sh_Spi1 TIS UP
Rassf6	673.691	1.32741	0.43991	3.01745	0.00254907	0.0910381	sh_Spi1 TIS UP
Rgcc	240.468	1.35125	0.361982	3.73292	0.000189274	0.0142162	sh_Spi1 TIS UP
Rasgef1a	86.6888	1.3718	0.442205	3.10217	0.00192108	0.0753323	sh_Spi1 TIS UP
Ipcef1	633.968	1.40642	0.458579	3.06692	0.00216279	0.0810017	sh_Spi1 TIS UP
Wnk2	184.65	1.44969	0.40487	3.58065	0.000342745	0.0222518	sh_Spi1 TIS UP
Pde10a	72.4149	1.482	0.403091	3.6766	0.000236366	0.0168334	sh_Spi1 TIS UP
Sec31b	219.161	1.4846	0.437921	3.39011	0.000698654	0.0367931	sh_Spi1 TIS UP
Ypel1	160.623	1.49947	0.494058	3.03501	0.00240527	0.0872309	sh_Spi1 TIS UP
BC061194	57.827	1.52939	0.509385	3.00242	0.00267844	0.0936774	sh_Spi1 TIS UP
Rec8	432.455	1.58552	0.510882	3.10349	0.00191251	0.0753323	sh_Spi1 TIS UP
Ryr2	463.014	1.62827	0.40973	3.97401	7.06724e-05	0.00698843	sh_Spi1 TIS UP
Zap70	461.172	1.66884	0.492451	3.38885	0.000701864	0.0368211	sh_Spi1 TIS UP
Rsph10b	94.2796	1.69654	0.459565	3.69162	0.000222833	0.0159523	sh_Spi1 TIS UP
Lbp	35.6451	1.71389	0.551878	3.10556	0.0018992	0.0752292	sh_Spi1 TIS UP
Epcam	80.7685	1.71645	0.546712	3.13959	0.00169185	0.0694383	sh_Spi1 TIS UP
Sh2d2a	393.626	1.71975	0.31844	5.40056	6.64316e-08	2.96593e-05	sh_Spi1 TIS UP
Arpp21	315.635	1.72793	0.482446	3.58159	0.000341509	0.0222518	sh_Spi1 TIS UP
Kcnf1	1770.46	1.729	0.549449	3.14679	0.00165076	0.0687565	sh_Spi1 TIS UP
Rsph1	564.468	1.73981	0.490866	3.54437	0.000393559	0.024367	sh_Spi1 TIS UP
Lck	161.477	1.7882	0.502421	3.55917	0.000372032	0.0234305	sh_Spi1 TIS UP
Tspan15	142.302	1.83892	0.551018	3.33731	0.00084593	0.0424354	sh_Spi1 TIS UP
Tsc2	6383.96	1.85578	0.369961	5.01614	5.27203e-07	0.000150967	sh_Spi1 TIS UP
Lmo7	951.764	1.85716	0.380448	4.88152	1.05273e-06	0.000263086	sh_Spi1 TIS UP
Ptgds	1346.02	1.86152	0.43628	4.26681	1.98287e-05	0.00269847	sh_Spi1 TIS UP
Gp6	171.929	1.86519	0.426167	4.37666	1.2051e-05	0.00180044	sh_Spi1 TIS UP
2610020H08Rik	216.741	1.99254	0.472314	4.21867	2.45749e-05	0.00316501	sh_Spi1 TIS UP
Msrb2	226.442	2.05469	0.345702	5.94352	2.78959e-09	2.25547e-06	sh_Spi1 TIS UP
Sytl2	80.0004	2.11203	0.677063	3.1194	0.00181218	0.0728317	sh_Spi1 TIS UP
Clstn3	127.213	2.13245	0.569868	3.74201	0.000182556	0.0139049	sh_Spi1 TIS UP
Pla2g4b	112.942	2.1655	0.722097	2.9989	0.00270958	0.0940484	sh_Spi1 TIS UP
Orc1	883.55	2.19659	0.381144	5.76314	8.25621e-09	5.67408e-06	sh_Spi1 TIS UP
Bmp4	196.38	2.24272	0.723047	3.10176	0.00192373	0.0753323	sh_Spi1 TIS UP
Dnase1	110.374	2.32803	0.664637	3.50271	0.000460546	0.0271683	sh_Spi1 TIS UP
Lrp8	196.561	2.46087	0.51889	4.74256	2.11033e-06	0.000467846	sh_Spi1 TIS UP
Cacna1a	182.389	2.69911	0.695572	3.88042	0.000104276	0.00942946	sh_Spi1 TIS UP
Mfsd4	361.701	2.70379	0.590287	4.58047	4.6393e-06	0.000850229	sh_Spi1 TIS UP
Mroh2a	60.4337	2.74744	0.688373	3.99121	6.57364e-05	0.00664373	sh_Spi1 TIS UP
Gm28047	18.2177	4.54893	1.45479	3.12685	0.00176689	0.0715549	sh_Spi1 TIS UP
Gm8325	118.954	8.38048	1.73514	4.82986	1.36629e-06	0.000323786	sh_Spi1 TIS UP
Rps12-ps3	714.95	21.0709	3.49433	6.03002	1.63944e-09	1.50227e-06	sh_Spi1 TIS UP

## Sheet: S3B - DEA, TIS sh_Cebpb
Supplementary Data 3B. Differentially expressed genes by knockdown of C/EBPb in TIS
Results of DE analysis by DESeq2 encompassing control;bcl2 TIS lymphomas, comparing sh_Cebpb vs. sh_ctrl pairs (n = 4).
DESeq2 models count data with a negative binomial distribution. Significance testing was performed using the Wald test
"padj" is the Benjamini-Hochberg adjusted P value.
The gene symbols used for downstream analyses of gene sets are assigned in the "Gene set" column.
Related to Supplementary Fig. 4e,f
Grey font indicates that genes had padj <0.10 but |log2FoldChange| < 0.58, i.e. not considered significant.
SYMBOL	baseMean	log2FoldChange	lfcSE	stat	pvalue	padj (<0.10)	Gene set
Igkv3-4	210.886	-2.93059	0.794744	-3.68746	0.000226505	0.0704872	sh_Cebpb TIS DOWN
Igkv12-44	122.008	-2.37637	0.600235	-3.95908	7.524e-05	0.0316783	sh_Cebpb TIS DOWN
Mob3b	244.777	-1.29578	0.337344	-3.84114	0.000122467	0.0461344	sh_Cebpb TIS DOWN
Nsun3	1047.29	-1.25758	0.316389	-3.97479	7.04401e-05	0.030556	sh_Cebpb TIS DOWN
Itgb7	1640.77	-1.18049	0.305248	-3.8673	0.000110046	0.0437587	sh_Cebpb TIS DOWN
Lpcat3	1099.71	-0.968173	0.271224	-3.56964	0.000357475	0.0992245	sh_Cebpb TIS DOWN
Scfd2	1124.92	-0.814515	0.189292	-4.30296	1.68531e-05	0.010966	sh_Cebpb TIS DOWN
Dusp5	4939.62	-0.793847	0.187713	-4.22904	2.34687e-05	0.0146067	sh_Cebpb TIS DOWN
Dhrs7	489.398	-0.791399	0.211012	-3.7505	0.000176485	0.0631595	sh_Cebpb TIS DOWN
Tyrobp	920.137	-0.781878	0.198232	-3.94426	8.00478e-05	0.0327395	sh_Cebpb TIS DOWN
Fcgr3	2716.59	-0.780573	0.179055	-4.35942	1.3041e-05	0.00997033	sh_Cebpb TIS DOWN
Psen2	2266.71	-0.732021	0.180148	-4.06345	4.83533e-05	0.0230726	sh_Cebpb TIS DOWN
Rac2	18200	-0.664615	0.163243	-4.07131	4.67487e-05	0.0230726	sh_Cebpb TIS DOWN
Tufm	6039.02	-0.532079	0.148147	-3.59156	0.000328705	0.0982435
Usp28	1370.96	0.581797	0.162016	3.59099	0.000329423	0.0982435	sh_Cebpb TIS UP
Mphosph9	1023.16	0.624971	0.168787	3.70271	0.00021331	0.0678562	sh_Cebpb TIS UP
Ctps2	3099.68	0.701889	0.150129	4.67524	2.93609e-06	0.00382093	sh_Cebpb TIS UP
Snx10	1573.76	0.753011	0.211011	3.56859	0.000358902	0.0992245	sh_Cebpb TIS UP
Acsl4	1249.8	0.803242	0.199959	4.01703	5.89357e-05	0.027215	sh_Cebpb TIS UP
Prdm15	1628.26	0.852592	0.20435	4.17221	3.01664e-05	0.0172733	sh_Cebpb TIS UP
Sp4	367.461	0.910366	0.220843	4.12222	3.75233e-05	0.0198943	sh_Cebpb TIS UP
Sh3bp5l	1547	0.995809	0.237247	4.19734	2.70067e-05	0.0161084	sh_Cebpb TIS UP
Erc1	797.125	1.04865	0.281782	3.72151	0.000198036	0.0674972	sh_Cebpb TIS UP
Ctnnal1	290.4	1.05635	0.240975	4.38362	1.16721e-05	0.00997033	sh_Cebpb TIS UP
Cep89	858.769	1.07156	0.278856	3.8427	0.00012169	0.0461344	sh_Cebpb TIS UP
Cbfa2t2	1783.19	1.1389	0.26212	4.34496	1.39299e-05	0.00997033	sh_Cebpb TIS UP
Epb4.1l1	377.838	1.36054	0.299586	4.54139	5.58845e-06	0.00571419	sh_Cebpb TIS UP
Inpp4a	405.663	1.3658	0.368492	3.70646	0.000210174	0.0678562	sh_Cebpb TIS UP
Efnb2	238.494	1.37133	0.27799	4.93303	8.09648e-07	0.00128779	sh_Cebpb TIS UP
Plch1	250.864	1.39655	0.273946	5.0979	3.43443e-07	0.000702342	sh_Cebpb TIS UP
Rccd1	639.269	1.45209	0.28316	5.12815	2.9261e-07	0.00069812	sh_Cebpb TIS UP
Gm12185	261.614	1.64819	0.405039	4.06921	4.71736e-05	0.0230726	sh_Cebpb TIS UP
Itga9	257.489	1.69489	0.253568	6.68416	2.32249e-11	1.10822e-07	sh_Cebpb TIS UP
Rps6kc1	383.548	1.73609	0.486187	3.57082	0.000355864	0.0992245	sh_Cebpb TIS UP
Lmo7	733.489	1.91798	0.366997	5.22616	1.7307e-07	0.000495498	sh_Cebpb TIS UP
Dnase1	84.757	1.94532	0.4468	4.35389	1.33743e-05	0.00997033	sh_Cebpb TIS UP
Tspan15	110.388	1.97703	0.475123	4.16109	3.1673e-05	0.0174384	sh_Cebpb TIS UP
Gpsm2	904.091	1.99482	0.438155	4.55277	5.2943e-06	0.00571419	sh_Cebpb TIS UP
Glb1l	230.695	2.16376	0.482371	4.48568	7.26812e-06	0.00693621	sh_Cebpb TIS UP
Itgb4	3032.81	2.46325	0.564633	4.36256	1.28547e-05	0.00997033	sh_Cebpb TIS UP
Entpd1	462.692	2.59492	0.308774	8.40397	4.31635e-17	6.17885e-13	sh_Cebpb TIS UP
Megf11	142.093	2.62281	0.735201	3.56747	0.000360438	0.0992245	sh_Cebpb TIS UP
Nrbp2	47.8324	2.64982	0.49084	5.39853	6.71873e-08	0.000240446	sh_Cebpb TIS UP
Lamb3	223.795	2.72837	0.631634	4.31955	1.56351e-05	0.0106579	sh_Cebpb TIS UP
Ptp4a1	115.827	2.813	0.562843	4.99785	5.79733e-07	0.00103736	sh_Cebpb TIS UP
1700025G04Rik	107.622	3.52193	0.479859	7.33951	2.14379e-13	1.53442e-09	sh_Cebpb TIS UP
Mroh2a	40.477	3.59172	0.790785	4.54196	5.57334e-06	0.00571419	sh_Cebpb TIS UP
Gm7204	15.8258	5.66577	1.52793	3.70814	0.000208784	0.0678562	sh_Cebpb TIS UP
Gm8325	86.098	8.871	1.83395	4.83711	1.31739e-06	0.00188585	sh_Cebpb TIS UP

## Sheet: S3C - DEA, TIS sh_Jun
Supplementary Data 3C. Differentially expressed genes by knockdown of c-Jun in TIS
Results of DE analysis by DESeq2 encompassing control;bcl2 TIS lymphomas, comparing sh_Jun vs. sh_ctrl pairs (n = 4).
DESeq2 models count data with a negative binomial distribution. Significance testing was performed using the Wald test
"padj" is the Benjamini-Hochberg adjusted P value.
The gene symbols used for downstream analyses of gene sets are assigned in the "Gene set" column.
Related to Supplementary Fig. 4e,f
Grey font indicates that genes had padj <0.10 but |log2FoldChange| < 0.58, i.e. not considered significant.
SYMBOL	baseMean	log2FoldChange	lfcSE	stat	pvalue	padj (<0.10)	Gene set
Tenc1	655.23	-1.22178	0.282359	-4.32703	1.51135e-05	0.024144	sh_Jun TIS DOWN
C3	1167.79	-1.01104	0.149041	-6.78363	1.17195e-11	1.66066e-07	sh_Jun TIS DOWN
Atf3	1135.32	-0.885986	0.221906	-3.99262	6.53474e-05	0.0440939	sh_Jun TIS DOWN
Tnfaip8l2	1300.8	-0.871555	0.225209	-3.86998	0.000108843	0.0670567	sh_Jun TIS DOWN
Lgals3	6107.81	-0.833174	0.196368	-4.24292	2.2063e-05	0.0260527	sh_Jun TIS DOWN
Cask	821.943	-0.755049	0.202094	-3.73613	0.00018687	0.0965613	sh_Jun TIS DOWN
Mad2l1	1352.91	-0.66047	0.154942	-4.2627	2.01975e-05	0.0260181	sh_Jun TIS DOWN
Jun	7041.06	-0.611325	0.112151	-5.45091	5.0112e-08	0.000236696	sh_Jun TIS DOWN
Egfl7	598.962	-0.57334	0.150776	-3.8026	0.000143186	0.0811578
Tcf25	15971.3	-0.556249	0.120734	-4.60722	4.08084e-06	0.0115651
Pgam1	22846.9	-0.521325	0.103754	-5.02464	5.04386e-07	0.00178679
Myof	3420.09	-0.501277	0.12287	-4.07972	4.50892e-05	0.0355981
Smarca4	30493.8	0.323634	0.0781116	4.14322	3.42459e-05	0.030329
Gne	7543.28	0.345716	0.0926631	3.73089	0.000190806	0.0965613
Acly	19225.2	0.408508	0.0951031	4.29543	1.74359e-05	0.0247066
Stxbp1	5132.07	0.437987	0.111289	3.93559	8.29932e-05	0.0534552
Nyx	2982.1	0.484536	0.127771	3.79221	0.000149313	0.0813757
Uvrag	4359.02	0.506229	0.117079	4.32382	1.53349e-05	0.024144
Sorcs2	3312.73	0.54377	0.130139	4.17838	2.93596e-05	0.027735
Fam172a	2042.56	0.673496	0.167902	4.01123	6.04023e-05	0.042795	sh_Jun TIS UP
Alpl	6345.02	0.711905	0.185204	3.84389	0.000121098	0.0714982	sh_Jun TIS UP
Pou2f1	2224.64	0.712371	0.169805	4.19523	2.72591e-05	0.0275901	sh_Jun TIS UP
Casp9	1520.45	1.04051	0.257406	4.0423	5.29305e-05	0.039475	sh_Jun TIS UP
4933427D14Rik	451.774	1.26032	0.281781	4.4727	7.72393e-06	0.0178293	sh_Jun TIS UP
Rhod	569.678	1.77981	0.421588	4.22169	2.42478e-05	0.0264301	sh_Jun TIS UP
Sipa1	8171.4	2.30937	0.346896	6.65723	2.79036e-11	1.97697e-07	sh_Jun TIS UP
Pxt1	70.6333	2.69823	0.661485	4.07905	4.52199e-05	0.0355981	sh_Jun TIS UP

## Sheet: S3D - DEA, sh_Ctr, TIS vs UT
Supplementary Data 3D. Differentially expressed genes by induction of TIS
Results of DE analysis by DESeq2 encompassing control;bcl2;sh_ctrl lymphomas, comparing ADR (=TIS) vs. UT pairs (n = 5).
DESeq2 models count data with a negative binomial distribution. Significance testing was performed using the Wald test
"padj" is the Benjamini-Hochberg adjusted P value.
The gene symbols used for downstream analyses of gene sets are assigned in the "Gene set" column.
Grey font indicates that genes had padj <0.05 but |log2FoldChange| < 0.58, i.e. not considered significant.
SYMBOL	baseMean	log2FoldChange	lfcSE	stat	pvalue	padj (<0.05)	Gene set
Rpl3-ps1	316.633	10.3664	1.55837	6.65208	2.8897e-11	2.70495e-09	TIS UP
Gm3272	25.3028	9.36276	3.02317	3.097	0.00195493	0.0126301	TIS UP
Gm8226	160.078	8.80053	2.14595	4.10099	4.11379e-05	0.000521644	TIS UP
Gm6563	68.6884	7.1978	2.67618	2.68958	0.00715424	0.0355833	TIS UP
Gm9825	36.0271	6.91485	1.20724	5.72783	1.01722e-08	4.5808e-07	TIS UP
Luzp4	11.7294	6.37603	1.31541	4.84719	1.25225e-06	2.83108e-05	TIS UP
Gm13394	873.875	6.36748	1.31738	4.83344	1.34194e-06	3.00476e-05	TIS UP
Gm6644	12.2705	6.13669	1.7961	3.41668	0.000633903	0.00502239	TIS UP
Col10a1	12.3054	6.0095	1.29465	4.64179	3.45401e-06	6.54729e-05	TIS UP
Il34	21.8738	5.85484	1.09008	5.37103	7.82871e-08	2.62459e-06	TIS UP
Gm15459	10377.6	5.69788	1.338	4.25851	2.0579e-05	0.000291571	TIS UP
Rps2-ps13	647.31	5.6682	0.560673	10.1096	5.00678e-24	6.41715e-21	TIS UP
Apol7a	8.40317	5.62398	1.43993	3.90572	9.39449e-05	0.00102139	TIS UP
Dock1	51.0244	5.52311	1.09781	5.03103	4.87847e-07	1.2544e-05	TIS UP
Gm15610	12.4304	5.48804	1.41045	3.89099	9.98379e-05	0.00106977	TIS UP
Nsg1	36.6626	5.41415	1.04738	5.16924	2.35054e-07	6.63808e-06	TIS UP
Il1b	216.741	5.40565	1.37768	3.92373	8.71902e-05	0.000966576	TIS UP
Gbp5	55.8366	5.40266	0.967375	5.58487	2.33875e-08	9.43542e-07	TIS UP
Zfp462	37.6406	5.39173	0.978647	5.50937	3.60113e-08	1.37619e-06	TIS UP
Cxcl5	33.4583	5.35938	1.24506	4.30451	1.67356e-05	0.000245938	TIS UP
Prickle2	8.39883	5.31498	1.40298	3.78834	0.000151654	0.00153702	TIS UP
BC002163	29.7774	5.30076	1.0807	4.90494	9.34567e-07	2.20251e-05	TIS UP
Tbx3	19.2922	5.29097	1.37429	3.84996	0.000118138	0.00123489	TIS UP
Slc38a4	33.8089	5.27371	0.716339	7.36203	1.8114e-13	2.93024e-11	TIS UP
Cdc42ep5	8.63244	5.23751	1.33132	3.93407	8.35197e-05	0.000933963	TIS UP
Gpx7	23.3701	5.22369	0.828869	6.30219	2.93469e-10	2.08965e-08	TIS UP
Dclk1	20.5733	5.21643	1.36618	3.81826	0.000134398	0.00137805	TIS UP
Wfdc17	297.071	5.18112	0.556248	9.3144	1.22642e-20	1.02307e-17	TIS UP
Il17rc	113.108	5.17796	0.813778	6.36287	1.98018e-10	1.48621e-08	TIS UP
Frk	13.0288	5.17179	1.3431	3.85064	0.000117812	0.00123225	TIS UP
Gm11868	115.666	5.15711	1.70385	3.02675	0.002472	0.015289	TIS UP
Itgbl1	10.2901	5.15155	1.27913	4.02739	5.63999e-05	0.000674128	TIS UP
Prss12	142.235	5.10387	0.70469	7.24271	4.39796e-13	6.53209e-11	TIS UP
Ugt1a6b	23.9288	5.09352	1.11229	4.57932	4.66486e-06	8.44847e-05	TIS UP
Dmkn	5.57721	5.06058	1.61027	3.14269	0.00167406	0.0111261	TIS UP
Pcdhb15	5.05661	4.97046	1.72975	2.87351	0.00405943	0.0227815	TIS UP
Igha	16.3571	4.96989	1.19347	4.16425	3.12372e-05	0.000410469	TIS UP
Twist2	23.5933	4.96763	0.990944	5.01303	5.35793e-07	1.35948e-05	TIS UP
Gm6969	21.1088	4.89158	0.907935	5.38758	7.14108e-08	2.42331e-06	TIS UP
C1s2	7.12322	4.87696	1.39781	3.489	0.000484839	0.00402712	TIS UP
Gpr149	10.9301	4.87634	1.30371	3.74035	0.000183764	0.00179162	TIS UP
Gm5286	5.48672	4.85829	1.61309	3.01179	0.00259709	0.0159208	TIS UP
Apoc2	30.3212	4.85667	0.979638	4.95762	7.13623e-07	1.73836e-05	TIS UP
Gucy2c	16.5775	4.85259	1.70341	2.84875	0.0043892	0.0242322	TIS UP
Mrgprf	4.4032	4.84654	1.6749	2.89362	0.00380825	0.0216454	TIS UP
Gm15501	214.105	4.8403	1.75737	2.75428	0.00588217	0.0305791	TIS UP
Vgll3	27.3912	4.82075	0.873513	5.51881	3.41299e-08	1.31637e-06	TIS UP
Kcna4	4.49107	4.81166	1.65937	2.8997	0.00373519	0.0213136	TIS UP
Nnmt	8.21072	4.79565	1.23048	3.89737	9.72414e-05	0.00104734	TIS UP
Acta2	126.186	4.79434	0.737253	6.50298	7.87427e-11	6.58462e-09	TIS UP
Mark1	5.23969	4.79164	1.63507	2.93054	0.00338376	0.0196378	TIS UP
Pcdhb9	10.4278	4.7877	1.318	3.63255	0.000280629	0.00254676	TIS UP
March1	109.625	4.78386	0.638934	7.48725	7.03316e-14	1.26007e-11	TIS UP
Ror2	14.6853	4.77371	1.03123	4.62914	3.6718e-06	6.90515e-05	TIS UP
Gja1	611.556	4.76632	0.659787	7.22403	5.04708e-13	7.21994e-11	TIS UP
Prr5l	43.1635	4.76572	0.860034	5.54132	3.00208e-08	1.1742e-06	TIS UP
Serpinb1b	6.33339	4.73263	1.68074	2.8158	0.00486561	0.0262026	TIS UP
Cxcl1	40.325	4.73195	0.988642	4.78632	1.69867e-06	3.64264e-05	TIS UP
Hebp2	6.78666	4.71294	1.5836	2.97609	0.00291946	0.0174621	TIS UP
Fam131b	12.0534	4.70684	1.1105	4.23849	2.25029e-05	0.000314153	TIS UP
Rgma	12.9967	4.69566	1.0937	4.29337	1.75978e-05	0.000256307	TIS UP
Ttn	7.24715	4.68502	1.39159	3.36666	0.000760852	0.00580729	TIS UP
Klhdc8a	21.0283	4.67727	1.01942	4.58815	4.47183e-06	8.18786e-05	TIS UP
Rpl34-ps1	179.234	4.65206	0.73167	6.35813	2.04219e-10	1.51906e-08	TIS UP
Bcl2a1d	27.0767	4.64971	1.08591	4.28185	1.85343e-05	0.000268338	TIS UP
Clu	31.4815	4.63997	1.03678	4.47536	7.62842e-06	0.000128707	TIS UP
Magea8	47.1021	4.63851	1.03174	4.49579	6.93116e-06	0.00011911	TIS UP
Mab21l1	3.87207	4.61888	1.78281	2.59079	0.00957549	0.0443329	TIS UP
Naalad2	25.2721	4.61666	0.784794	5.88263	4.0379e-09	2.08772e-07	TIS UP
Gm10263	55.2039	4.61448	0.637411	7.23941	4.50627e-13	6.58627e-11	TIS UP
Trem1	15.9843	4.61071	1.26422	3.64708	0.000265242	0.00243065	TIS UP
Sec1	4.39883	4.59579	1.72151	2.66962	0.0075937	0.0371006	TIS UP
Klra4	4.27712	4.58377	1.70227	2.69274	0.00708681	0.0353305	TIS UP
Nxf3	25.2286	4.57395	0.965108	4.73931	2.14442e-06	4.39488e-05	TIS UP
Smarcd3	24.2146	4.56443	0.829469	5.50283	3.73742e-08	1.41947e-06	TIS UP
Cdh2	61.6324	4.56302	0.770181	5.92461	3.13039e-09	1.68254e-07	TIS UP
Col3a1	159.156	4.55054	0.507397	8.96841	3.00824e-19	2.00493e-16	TIS UP
Msantd3	52.9655	4.55052	1.1655	3.90436	9.44761e-05	0.00102551	TIS UP
Gstt1	185.937	4.54842	0.838996	5.42127	5.9178e-08	2.06281e-06	TIS UP
Ugt1a6a	54.0317	4.5476	0.888782	5.11667	3.10985e-07	8.39317e-06	TIS UP
Ugt1a7c	52.3674	4.53723	0.798102	5.68503	1.30793e-08	5.73492e-07	TIS UP
Gm7658	7.49225	4.53654	1.70561	2.65978	0.00781917	0.0379612	TIS UP
Fgf2	75.5252	4.51906	0.885973	5.10067	3.38452e-07	9.04742e-06	TIS UP
Pxdn	88.4919	4.51671	0.595728	7.58183	3.4072e-14	6.83986e-12	TIS UP
Plcb1	13.7558	4.5059	1.5581	2.89192	0.00382899	0.0217076	TIS UP
Pgpep1l	61.1635	4.48174	1.00515	4.45876	8.24351e-06	0.000137216	TIS UP
Ngef	24.9699	4.46923	0.941124	4.74882	2.04603e-06	4.24016e-05	TIS UP
Gdnf	16.5541	4.45063	0.966218	4.60623	4.10027e-06	7.61383e-05	TIS UP
Hoxa5	11.4838	4.45034	1.16438	3.82208	0.000132328	0.00136102	TIS UP
Osr1	18.6613	4.44752	0.990994	4.48794	7.19139e-06	0.000122644	TIS UP
Cyp2j6	39.6214	4.44429	0.979376	4.53788	5.68219e-06	0.00010072	TIS UP
Col6a1	238.136	4.42097	0.542034	8.15626	3.45555e-16	1.04684e-13	TIS UP
Col6a2	154.046	4.41479	0.603052	7.32074	2.46608e-13	3.8764e-11	TIS UP
Mfap5	21.1676	4.41349	0.981968	4.49454	6.97219e-06	0.000119517	TIS UP
Fscn1	343.542	4.41345	0.422756	10.4397	1.63346e-25	3.40209e-22	TIS UP
Stard13	9.48817	4.40927	1.23419	3.57261	0.000353441	0.00307744	TIS UP
Ltbp3	496.881	4.40841	0.35839	12.3006	8.99306e-35	1.49842e-30	TIS UP
Ces2e	111.323	4.40157	0.527757	8.34013	7.42058e-17	2.63067e-14	TIS UP
Tnc	51.9851	4.39642	0.696048	6.31627	2.6795e-10	1.93272e-08	TIS UP
H2afy2	17.9421	4.39474	0.916065	4.79741	1.60733e-06	3.47808e-05	TIS UP
Hba-a1	5.43161	4.38945	1.49549	2.93513	0.0033341	0.0194037	TIS UP
Krt15	5.59248	4.37816	1.42261	3.07755	0.00208708	0.0133084	TIS UP
Msrb3	72.8747	4.37205	0.707116	6.18293	6.29236e-10	4.14401e-08	TIS UP
Wasf3	21.6119	4.37025	0.857224	5.09814	3.43002e-07	9.12227e-06	TIS UP
Slit3	31.1697	4.36548	0.935092	4.66851	3.03397e-06	5.86829e-05	TIS UP
Cx3cl1	19.102	4.36407	1.04468	4.17742	2.94837e-05	0.00039144	TIS UP
Btbd3	16.6402	4.34043	1.03957	4.17521	2.97708e-05	0.000394623	TIS UP
Fxyd2	15.9159	4.34004	1.23766	3.50663	0.000453815	0.00380739	TIS UP
Ogn	8.70091	4.33679	1.20401	3.60196	0.000315833	0.00280363	TIS UP
Wisp1	15.8303	4.31978	0.984832	4.38631	1.15288e-05	0.000179334	TIS UP
Fzd1	12.9985	4.31869	1.08348	3.98596	6.72077e-05	0.000777649	TIS UP
BC100451	4.11301	4.3177	1.55121	2.78345	0.00537849	0.0284316	TIS UP
Bnc1	38.277	4.30796	0.902198	4.77496	1.79742e-06	3.80058e-05	TIS UP
Zfp57	12.8357	4.29355	1.12314	3.8228	0.000131947	0.00135793	TIS UP
Adam23	36.582	4.27916	0.744915	5.7445	9.21935e-09	4.20857e-07	TIS UP
Cdh1	9.81466	4.27902	1.20409	3.55374	0.000379798	0.00326364	TIS UP
Efemp1	442.818	4.27037	0.509625	8.37943	5.31843e-17	2.06083e-14	TIS UP
Thbs2	207.242	4.26748	0.615011	6.93886	3.95277e-12	4.67099e-10	TIS UP
Ppbp	6.76812	4.26708	1.28426	3.32259	0.000891846	0.00659855	TIS UP
Nrg1	56.0114	4.26016	0.640909	6.64707	2.98993e-11	2.76768e-09	TIS UP
Frmpd4	11.1957	4.25606	1.41486	3.00812	0.00262866	0.0160671	TIS UP
Gsta4	69.8322	4.25556	0.480161	8.86279	7.80395e-19	4.71366e-16	TIS UP
Bicc1	19.3752	4.24629	0.957051	4.43684	9.12885e-06	0.000148685	TIS UP
Krt14	5.04762	4.24202	1.55451	2.72885	0.00635558	0.0323864	TIS UP
Hoxa1	6.13878	4.22576	1.57913	2.67601	0.00745048	0.0366302	TIS UP
Ptgfr	43.2753	4.22376	1.03935	4.06384	4.82713e-05	0.000594454	TIS UP
Gm773	19.6401	4.21747	1.07028	3.94052	8.13061e-05	0.000914118	TIS UP
Fam26e	6.55393	4.20765	1.25182	3.36121	0.00077601	0.00589598	TIS UP
Lyz2	1993	4.20599	0.622066	6.76133	1.36733e-11	1.40633e-09	TIS UP
Sash1	44.4709	4.19671	0.611207	6.86627	6.59012e-12	7.17997e-10	TIS UP
Col4a2	328.575	4.19387	0.557853	7.51788	5.56731e-14	1.03069e-11	TIS UP
Sdpr	150.054	4.19001	0.709558	5.9051	3.52437e-09	1.85246e-07	TIS UP
Cyr61	234.766	4.18676	0.506577	8.26481	1.3992e-16	4.75787e-14	TIS UP
Gas1	26.6449	4.17738	0.955584	4.37154	1.23371e-05	0.00019051	TIS UP
AU021092	5.42708	4.17725	1.3054	3.19997	0.0013744	0.00949034	TIS UP
Gprc5b	64.3261	4.17599	0.678691	6.15301	7.60256e-10	4.79825e-08	TIS UP
Gdf5	5.20493	4.17433	1.34506	3.10345	0.00191279	0.0123963	TIS UP
Tvp23a	9.54704	4.17154	1.22379	3.40871	0.000652714	0.00514209	TIS UP
Mgp	54.5009	4.17009	0.893521	4.66704	3.05577e-06	5.89296e-05	TIS UP
Dnajc22	11.7382	4.1628	1.14752	3.62765	0.000286008	0.00258993	TIS UP
Adh7	57.1276	4.16248	0.70424	5.9106	3.4086e-09	1.80873e-07	TIS UP
Kcnj16	30.6545	4.16129	1.30204	3.19598	0.00139358	0.00959103	TIS UP
Cemip	48.7455	4.1607	0.760671	5.46978	4.50601e-08	1.64647e-06	TIS UP
Gm5619	176.363	4.15467	0.716661	5.79725	6.74094e-09	3.17827e-07	TIS UP
Fam115c	14.2968	4.12506	1.28414	3.21233	0.00131664	0.00914461	TIS UP
Gpr125	116.931	4.12337	0.813471	5.06886	4.00207e-07	1.04847e-05	TIS UP
Arrdc4	44.875	4.11114	0.763881	5.38191	7.37003e-08	2.49086e-06	TIS UP
Tspan11	45.9096	4.09831	0.930247	4.40561	1.05485e-05	0.000167231	TIS UP
Rab39b	8.12983	4.08605	1.2968	3.15087	0.00162784	0.0108885	TIS UP
Loxl4	71.8162	4.08418	0.698327	5.84852	4.95972e-09	2.43772e-07	TIS UP
Rps6ka6	7.17949	4.08364	1.23609	3.30368	0.000954234	0.00697956	TIS UP
Brsk1	7.05827	4.07754	1.26367	3.22674	0.00125209	0.00875832	TIS UP
Adamts5	23.3557	4.07143	0.924237	4.40518	1.05697e-05	0.000167391	TIS UP
Fkbp9	219.708	4.06863	0.558389	7.28638	3.18399e-13	4.95809e-11	TIS UP
Nccrp1	5.20484	4.0609	1.41069	2.87866	0.00399363	0.0224424	TIS UP
Gstt4	19.0056	4.03785	1.2405	3.25503	0.0011338	0.00806378	TIS UP
Madcam1	13.3806	4.01843	1.08935	3.68884	0.00022528	0.00211234	TIS UP
Ccl22	61.0008	4.01429	1.27791	3.14129	0.00168207	0.0111571	TIS UP
Serpina3n	15.5741	4.0092	1.06153	3.77682	0.000158841	0.00158335	TIS UP
Mylk	24.543	3.99825	1.21701	3.2853	0.00101874	0.00737688	TIS UP
Fam46b	7.74721	3.99426	1.09986	3.6316	0.000281664	0.00255476	TIS UP
Casp12	5.95093	3.99319	1.327	3.00919	0.00261947	0.0160168	TIS UP
Prrx2	33.65	3.99026	0.682662	5.84515	5.06115e-09	2.47042e-07	TIS UP
Hoxa7	30.8743	3.9881	0.689304	5.7857	7.22113e-09	3.35149e-07	TIS UP
Dram1	15.1543	3.9851	0.953095	4.18123	2.89942e-05	0.000386172	TIS UP
Steap2	66.6371	3.98267	0.723692	5.50327	3.72809e-08	1.41947e-06	TIS UP
Cald1	378.46	3.97407	0.589959	6.73619	1.62598e-11	1.64195e-09	TIS UP
Anxa8	95.9494	3.97221	0.617745	6.43018	1.27451e-10	1.01973e-08	TIS UP
Gpx8	58.087	3.96863	0.795799	4.98697	6.13334e-07	1.52528e-05	TIS UP
Ngf	29.9888	3.9624	0.738026	5.36892	7.92117e-08	2.64576e-06	TIS UP
Pdpn	88.5586	3.96098	0.671794	5.89612	3.72143e-09	1.94378e-07	TIS UP
Evc2	37.0108	3.95931	0.928474	4.26432	2.0051e-05	0.000285547	TIS UP
Arxes1	5.46912	3.958	1.45728	2.71603	0.00660705	0.0334001	TIS UP
Ptafr	71.0152	3.95797	0.695918	5.68741	1.28982e-08	5.68545e-07	TIS UP
Col1a2	1525.2	3.95594	0.472806	8.36694	5.91334e-17	2.18951e-14	TIS UP
Gm10243	82.7127	3.94869	0.910102	4.33873	1.4331e-05	0.000216681	TIS UP
Gm3336	10.3862	3.94824	1.19619	3.30067	0.000964558	0.00704271	TIS UP
Leprel4	147.617	3.94748	0.64871	6.08512	1.16405e-09	7.07864e-08	TIS UP
Timp2	1058.41	3.94697	0.497249	7.93762	2.06095e-15	5.62944e-13	TIS UP
Cpe	602.315	3.93646	0.52616	7.48149	7.34819e-14	1.3025e-11	TIS UP
Cyp3a13	4.47055	3.93485	1.37917	2.85305	0.00433022	0.023994	TIS UP
Fbln5	36.2167	3.92877	0.701566	5.60001	2.14339e-08	8.77475e-07	TIS UP
Lamp3	47.4375	3.92468	0.620885	6.32111	2.59689e-10	1.89778e-08	TIS UP
Ptx3	30.9711	3.91341	0.81281	4.81467	1.47441e-06	3.23244e-05	TIS UP
Cacnb3	114.04	3.9133	0.508524	7.69541	1.41046e-14	3.0521e-12	TIS UP
Nav3	26.7226	3.91282	1.16895	3.34729	0.00081605	0.00614191	TIS UP
Lamb1	394.54	3.91108	0.520644	7.512	5.82289e-14	1.06617e-11	TIS UP
Foxc2	18.5447	3.90966	0.859102	4.55086	5.34262e-06	9.54114e-05	TIS UP
Tbx4	5.49588	3.90526	1.3945	2.80046	0.00510293	0.0272254	TIS UP
S1pr3	20.7349	3.90435	1.09303	3.57204	0.000354206	0.00308187	TIS UP
Ppic	91.3049	3.89627	0.683256	5.7025	1.18064e-08	5.23189e-07	TIS UP
Cldn9	6.46305	3.89299	1.52708	2.5493	0.010794	0.0488854	TIS UP
Fam13c	5.30352	3.88873	1.34066	2.90061	0.00372442	0.021263	TIS UP
Cd302	22.0447	3.88863	0.927589	4.19219	2.76276e-05	0.000371835	TIS UP
Ccl7	49.5963	3.88711	0.676593	5.74512	9.18574e-09	4.20857e-07	TIS UP
Pdk4	33.64	3.88605	0.797388	4.87347	1.09656e-06	2.52011e-05	TIS UP
Dpep1	4.33874	3.88597	1.45061	2.67884	0.00738771	0.0363918	TIS UP
Pmepa1	38.6175	3.88559	0.632422	6.14399	8.04753e-10	5.0409e-08	TIS UP
Asgr1	5.72669	3.88115	1.44131	2.6928	0.00708554	0.0353305	TIS UP
Met	48.1213	3.87609	0.663165	5.84483	5.07073e-09	2.47042e-07	TIS UP
Palld	43.6806	3.87406	0.651147	5.94959	2.68814e-09	1.46372e-07	TIS UP
Prkd1	12.7159	3.87327	1.08115	3.58253	0.000340283	0.00298567	TIS UP
Ccl2	163.245	3.87034	0.570696	6.78178	1.18702e-11	1.25178e-09	TIS UP
Sema3a	40.1492	3.86653	0.992618	3.89528	9.80844e-05	0.0010537	TIS UP
Dpysl3	161.316	3.8584	0.610862	6.31631	2.67884e-10	1.93272e-08	TIS UP
Fhl2	56.0187	3.85569	0.753435	5.11747	3.09658e-07	8.39317e-06	TIS UP
Soga3	19.7323	3.84791	1.01847	3.77812	0.000158014	0.00158073	TIS UP
Pcdh18	26.4627	3.84718	0.912954	4.21399	2.50897e-05	0.00034266	TIS UP
Gm21762	11.0035	3.84386	1.50631	2.55183	0.0107158	0.0485577	TIS UP
Erbb2	32.8767	3.84302	0.752868	5.10451	3.31651e-07	8.88419e-06	TIS UP
Akr1b8	65.3072	3.84237	0.627151	6.12671	8.97153e-10	5.57775e-08	TIS UP
Map6	74.3862	3.84206	0.62077	6.18918	6.04774e-10	3.99871e-08	TIS UP
Pir	9.86556	3.84002	1.10624	3.47124	0.00051806	0.00423548	TIS UP
Smo	87.5043	3.83881	0.659432	5.82138	5.83643e-09	2.8025e-07	TIS UP
Pak3	27.656	3.83876	0.88859	4.32005	1.55992e-05	0.000232897	TIS UP
Ttc39a	7.32659	3.83737	1.18156	3.24771	0.00116337	0.00822756	TIS UP
Col5a2	254.767	3.8373	0.440547	8.7103	3.03083e-18	1.5303e-15	TIS UP
Ptprk	37.332	3.83314	0.778846	4.92156	8.58571e-07	2.05244e-05	TIS UP
Xlr3c	13.1018	3.83245	1.22309	3.13342	0.0017278	0.0114015	TIS UP
Slc22a23	51.4647	3.83026	1.0603	3.61242	0.000303354	0.00271371	TIS UP
Flnc	223.124	3.82813	0.618444	6.18995	6.01844e-10	3.99871e-08	TIS UP
Procr	86.2266	3.82039	0.618316	6.17869	6.46344e-10	4.23991e-08	TIS UP
Gpr39	5.61033	3.8167	1.39102	2.74382	0.00607281	0.0312976	TIS UP
Prelp	26.3864	3.81564	0.86601	4.406	1.05298e-05	0.000167093	TIS UP
Wnt5a	20.8858	3.80957	0.880946	4.32441	1.5294e-05	0.000228956	TIS UP
Igfbp6	296.985	3.80879	0.448164	8.49867	1.91777e-17	7.79364e-15	TIS UP
S100a4	1388.06	3.80568	0.42609	8.93162	4.19797e-19	2.69025e-16	TIS UP
Sdsl	17.0691	3.8056	1.04544	3.6402	0.000272431	0.00248318	TIS UP
Adamts12	19.2027	3.80548	0.80804	4.70952	2.48299e-06	4.97254e-05	TIS UP
Kitl	101.869	3.79793	0.540704	7.02404	2.15549e-12	2.68021e-10	TIS UP
H2-Q2	25.2991	3.79719	1.01885	3.72694	0.000193819	0.00187213	TIS UP
Ptgis	48.2875	3.79613	0.750093	5.06088	4.17319e-07	1.08987e-05	TIS UP
Clec4e	20.5203	3.78636	1.15084	3.29009	0.00100156	0.00727466	TIS UP
Tbx18	10.8686	3.78048	0.985845	3.83476	0.000125685	0.00130315	TIS UP
Gdf15	9.63733	3.77454	1.00316	3.76266	0.000168116	0.0016624	TIS UP
Aqp1	202.728	3.77415	0.490893	7.68833	1.49063e-14	3.18422e-12	TIS UP
Arhgap28	5.72389	3.76691	1.37434	2.74089	0.00612723	0.0315001	TIS UP
Col8a1	72.0253	3.76421	0.685097	5.49442	3.92004e-08	1.47162e-06	TIS UP
Stat4	118.002	3.76332	0.778881	4.8317	1.35374e-06	3.02157e-05	TIS UP
Ptprg	40.9488	3.76163	0.849924	4.42584	9.60665e-06	0.000154952	TIS UP
Plekhh2	22.5756	3.74944	0.783957	4.78271	1.72952e-06	3.68507e-05	TIS UP
Gnb3	30.3145	3.74902	0.712486	5.26189	1.42583e-07	4.36714e-06	TIS UP
Cbr2	13.6328	3.74223	0.95481	3.91934	8.8791e-05	0.000979008	TIS UP
Pdgfc	33.7792	3.73559	0.719316	5.19325	2.06657e-07	5.94701e-06	TIS UP
Edn1	5.40617	3.73542	1.293	2.88896	0.00386512	0.0218901	TIS UP
Prl2c3	113.688	3.72506	0.85225	4.37086	1.2376e-05	0.000190934	TIS UP
Rpl30-ps8	103.095	3.72094	0.994077	3.74311	0.000181755	0.00177411	TIS UP
Ttc12	6.39077	3.71943	1.25697	2.95904	0.00308602	0.0182338	TIS UP
Foxg1	40.9291	3.71932	0.669477	5.55556	2.76721e-08	1.10041e-06	TIS UP
Il1rl1	371.561	3.71557	0.661243	5.61907	1.91991e-08	7.97744e-07	TIS UP
Col1a1	1553.76	3.71306	0.583323	6.36536	1.9483e-10	1.4689e-08	TIS UP
Rhoc	226.209	3.71109	0.424339	8.74558	2.21867e-18	1.15523e-15	TIS UP
Pcdhb17	7.48159	3.70408	1.17598	3.14977	0.00163397	0.0109207	TIS UP
Mtcl1	49.4856	3.7029	0.913273	4.05454	5.02335e-05	0.00061408	TIS UP
2610034B18Rik	20.1877	3.69725	0.806669	4.58336	4.57573e-06	8.32324e-05	TIS UP
Cln8	286.82	3.69196	0.478695	7.71256	1.23318e-14	2.70357e-12	TIS UP
Crabp1	12.9258	3.68913	1.08829	3.38985	0.000699311	0.00543161	TIS UP
Ptprn	170.14	3.68883	0.499221	7.38917	1.47744e-13	2.43734e-11	TIS UP
Otx1	10.4447	3.68464	1.37373	2.68221	0.00731366	0.0361496	TIS UP
Htra1	14.1235	3.68375	1.00382	3.66972	0.000242812	0.00224955	TIS UP
B3galnt1	11.6104	3.6828	1.14118	3.22718	0.00125016	0.00875214	TIS UP
Bdnf	50.1712	3.68134	0.671081	5.48569	4.11856e-08	1.52158e-06	TIS UP
Gpr173	5.27142	3.67864	1.34729	2.7304	0.00632579	0.032283	TIS UP
Gstm2	39.1807	3.67801	0.699858	5.25537	1.47728e-07	4.47535e-06	TIS UP
Snrpn	7.96062	3.6773	1.23618	2.97473	0.0029325	0.0175193	TIS UP
1700024B05Rik	13.6287	3.67188	0.960218	3.82401	0.000131301	0.00135407	TIS UP
Plcb4	8.36026	3.6701	1.05218	3.48808	0.000486504	0.00403543	TIS UP
S100a5	9.32031	3.66243	1.18467	3.09153	0.00199127	0.0127955	TIS UP
4930506M07Rik	19.6667	3.66192	1.01345	3.61331	0.000302309	0.00270665	TIS UP
Efemp2	168.198	3.65975	0.514464	7.11372	1.12959e-12	1.5057e-10	TIS UP
Obsl1	38.6868	3.6565	0.751773	4.86384	1.15129e-06	2.62418e-05	TIS UP
Tmem184a	30.8168	3.65639	0.820757	4.45491	8.39301e-06	0.000139149	TIS UP
Sdc2	83.806	3.65207	0.616102	5.92771	3.07197e-09	1.65648e-07	TIS UP
Gpr153	36.0591	3.64284	0.663016	5.49435	3.92148e-08	1.47162e-06	TIS UP
Tenm4	43.7425	3.6413	0.576392	6.31741	2.65985e-10	1.93272e-08	TIS UP
Hoxd9	9.0384	3.63639	1.12175	3.24172	0.0011881	0.00839171	TIS UP
Gimap4	106.494	3.63365	0.777205	4.67528	2.93559e-06	5.70744e-05	TIS UP
Bgn	1508.03	3.63045	0.302656	11.9953	3.76044e-33	3.13282e-29	TIS UP
Sqrdl	51.8008	3.62905	0.69234	5.24172	1.59089e-07	4.72504e-06	TIS UP
Adra1b	8.67602	3.62773	1.21219	2.99271	0.00276513	0.0167429	TIS UP
Sod3	36.5876	3.61967	0.688186	5.25972	1.44272e-07	4.41076e-06	TIS UP
Zfp334	14.6189	3.61893	0.864688	4.18524	2.84859e-05	0.000380925	TIS UP
Pax9	5.3561	3.61618	1.35215	2.67439	0.00748649	0.0367542	TIS UP
Igfbp7	47.1961	3.61399	0.689346	5.24263	1.58301e-07	4.71002e-06	TIS UP
Fetub	25.4154	3.609	0.700848	5.14948	2.61212e-07	7.27812e-06	TIS UP
Tm4sf1	234.801	3.60636	0.655378	5.50271	3.73994e-08	1.41947e-06	TIS UP
Apc2	34.3479	3.60369	0.891149	4.04388	5.25747e-05	0.000636155	TIS UP
Syn1	11.8131	3.60032	0.863337	4.17023	3.04287e-05	0.000402064	TIS UP
Htra3	13.9584	3.60018	1.14472	3.14504	0.00166066	0.0110802	TIS UP
Galnt13	7.65487	3.59847	1.25404	2.8695	0.0041112	0.0230268	TIS UP
Cd109	223.755	3.59394	0.43771	8.21078	2.19758e-16	7.04156e-14	TIS UP
Speg	49.4864	3.59066	0.877899	4.09007	4.31249e-05	0.000541891	TIS UP
Grem2	58.6952	3.58067	0.66948	5.34843	8.87227e-08	2.89295e-06	TIS UP
Cda	18.5784	3.57885	0.774274	4.62221	3.79674e-06	7.12401e-05	TIS UP
Clec7a	32.7033	3.57259	0.883375	4.04425	5.24898e-05	0.0006356	TIS UP
Epn3	8.15114	3.5703	1.06173	3.36273	0.000771755	0.00586632	TIS UP
Dnase1l3	192.612	3.56476	0.679486	5.24626	1.55218e-07	4.63396e-06	TIS UP
Lox	442.777	3.56358	0.578285	6.16232	7.16852e-10	4.59392e-08	TIS UP
Apcdd1	60.9029	3.56167	0.668376	5.32884	9.88421e-08	3.15654e-06	TIS UP
Ptgs2	383.912	3.56137	0.472971	7.52979	5.08224e-14	9.64326e-12	TIS UP
Arnt2	22.1517	3.56009	1.08356	3.28555	0.00101785	0.00737684	TIS UP
Masp1	70.849	3.55977	0.767804	4.6363	3.54693e-06	6.69297e-05	TIS UP
Fam179a	29.7937	3.5591	0.820576	4.33731	1.44234e-05	0.000217881	TIS UP
Fbn1	55.2279	3.5509	0.522065	6.80164	1.03436e-11	1.10477e-09	TIS UP
Lurap1l	11.5398	3.55063	0.93061	3.81538	0.000135974	0.00139164	TIS UP
Radil	10.0682	3.54732	1.17578	3.01699	0.00255295	0.0156964	TIS UP
Ltf	7.83288	3.54509	1.24384	2.85011	0.00437045	0.0241607	TIS UP
Plxnb1	34.8243	3.54452	0.804659	4.40499	1.05787e-05	0.000167391	TIS UP
Npas3	48.9272	3.54345	1.31575	2.6931	0.007079	0.0353305	TIS UP
Fam110c	44.8829	3.53841	0.76701	4.61325	3.96417e-06	7.38825e-05	TIS UP
Atp13a4	8.65541	3.53633	1.10576	3.19809	0.00138341	0.00953675	TIS UP
Faxc	19.4659	3.53611	0.948054	3.72986	0.000191586	0.00185378	TIS UP
Sh3gl3	14.4426	3.53137	0.985063	3.58492	0.000337183	0.00296315	TIS UP
Cd59a	69.849	3.52893	0.576741	6.11875	9.43143e-10	5.84188e-08	TIS UP
Tnfsf8	19.2547	3.52749	1.02985	3.42524	0.00061425	0.0048993	TIS UP
Rmdn2	24.2095	3.51884	0.818149	4.30098	1.70044e-05	0.000249188	TIS UP
Plat	68.7168	3.51684	0.471465	7.45939	8.69211e-14	1.5245e-11	TIS UP
Zfp93	17.4824	3.51611	1.11661	3.1489	0.00163885	0.0109445	TIS UP
Hmga2	297.594	3.51609	0.55309	6.35717	2.05505e-10	1.52184e-08	TIS UP
Fcrl5	85.3835	3.51581	0.546865	6.42903	1.28421e-10	1.01973e-08	TIS UP
S100a6	1773.77	3.51499	0.357606	9.82921	8.42776e-23	1.00302e-19	TIS UP
Ddx3y	367.171	3.51391	1.15093	3.05311	0.00226484	0.0142403	TIS UP
Hist1h2ba	8.2664	3.51366	1.35259	2.59773	0.00938415	0.0436756	TIS UP
Ephb4	81.5044	3.513	0.674651	5.20713	1.91787e-07	5.58663e-06	TIS UP
Parva	133.503	3.5103	0.660369	5.31566	1.06271e-07	3.34723e-06	TIS UP
Pcdh1	74.8483	3.50808	0.49116	7.14243	9.16926e-13	1.24896e-10	TIS UP
Fkbp10	215.13	3.50046	0.437261	8.00542	1.19059e-15	3.41467e-13	TIS UP
Hspb8	163.039	3.49297	0.540242	6.46557	1.00915e-10	8.20221e-09	TIS UP
Ophn1	12.9367	3.49228	0.938335	3.72178	0.00019782	0.00190216	TIS UP
Grem1	49.7923	3.48819	0.771002	4.52424	6.06139e-06	0.00010631	TIS UP
Osmr	60.1065	3.48609	0.690923	5.04555	4.52209e-07	1.17546e-05	TIS UP
Rhoj	9.30515	3.48421	1.19557	2.91426	0.0035653	0.0205057	TIS UP
Cdc42ep1	44.8525	3.48386	0.652347	5.34051	9.2687e-08	3.01043e-06	TIS UP
Fbln2	674.534	3.47303	0.533842	6.50571	7.73249e-11	6.507e-09	TIS UP
Gsta1	11.1506	3.47063	1.03673	3.34766	0.000814956	0.00614147	TIS UP
Mmp2	196.477	3.47021	0.407145	8.52328	1.55098e-17	6.46059e-15	TIS UP
Kcns1	602.944	3.4693	0.661224	5.24678	1.54781e-07	4.63009e-06	TIS UP
Cryab	255.388	3.4606	0.525861	6.58083	4.67837e-11	4.1685e-09	TIS UP
Spon2	35.3694	3.45993	0.784674	4.40939	1.03664e-05	0.000164814	TIS UP
Akr1c12	22.5761	3.45827	0.937062	3.69054	0.000223775	0.00210177	TIS UP
Fxyd6	277.941	3.4557	1.2816	2.69638	0.0070097	0.0350843	TIS UP
Gata4	41.8959	3.45272	0.704026	4.90425	9.37842e-07	2.20711e-05	TIS UP
Sgcd	7.02375	3.451	1.31301	2.62832	0.00858079	0.0406636	TIS UP
Pcolce	291.313	3.44836	0.423711	8.13847	4.00295e-16	1.19102e-13	TIS UP
Col4a5	138.584	3.44834	0.540929	6.37485	1.83146e-10	1.38708e-08	TIS UP
Plxna4	6.10393	3.44472	1.16436	2.95845	0.00309188	0.0182555	TIS UP
Zfp467	25.0189	3.4445	0.887247	3.88223	0.000103502	0.00110336	TIS UP
Zfp521	12.4339	3.44378	0.975758	3.52934	0.000416595	0.00353607	TIS UP
Ptpn14	265.434	3.44234	0.401225	8.57957	9.52258e-18	4.1754e-15	TIS UP
Nmnat2	22.9315	3.43704	0.904974	3.79795	0.0001459	0.00148503	TIS UP
Wls	101.119	3.43341	0.498243	6.89103	5.53899e-12	6.23586e-10	TIS UP
Pla2g7	333.877	3.43057	0.463245	7.40552	1.30636e-13	2.19865e-11	TIS UP
Car11	39.2369	3.42867	0.848403	4.04132	5.3151e-05	0.000641275	TIS UP
Map1a	116.453	3.42715	0.367946	9.31426	1.22803e-20	1.02307e-17	TIS UP
Plagl1	21.362	3.41498	0.789363	4.32625	1.51666e-05	0.000227254	TIS UP
Fbxl16	18.1879	3.41259	0.703487	4.85096	1.22864e-06	2.78904e-05	TIS UP
Fam115a	40.6884	3.40976	0.785384	4.34152	1.41499e-05	0.000214138	TIS UP
Podnl1	19.1391	3.40871	0.864242	3.94416	8.00799e-05	0.000903991	TIS UP
Tead1	73.4379	3.40709	0.605418	5.62768	1.82654e-08	7.62754e-07	TIS UP
Prdm5	13.4171	3.40441	0.853535	3.9886	6.64651e-05	0.000772275	TIS UP
Amotl2	143.48	3.40255	0.609578	5.58181	2.38024e-08	9.55653e-07	TIS UP
Cc2d2a	10.6546	3.40152	0.969395	3.5089	0.000449957	0.00378073	TIS UP
Iglc2	5741.45	3.39955	0.434536	7.82342	5.14074e-15	1.2765e-12	TIS UP
Itgax	20.9438	3.39574	0.973489	3.48821	0.00048626	0.00403543	TIS UP
Fat1	235.735	3.38383	0.501571	6.74645	1.51503e-11	1.54868e-09	TIS UP
Serpinb9g	16.5174	3.38164	1.04694	3.23003	0.00123776	0.00867994	TIS UP
Zyx	257.711	3.38021	0.432407	7.81718	5.40201e-15	1.30447e-12	TIS UP
Bdkrb1	13.2613	3.37927	0.830921	4.06689	4.7645e-05	0.00058761	TIS UP
Layn	42.3225	3.37572	0.602463	5.60321	2.10422e-08	8.67835e-07	TIS UP
Usp13	6.52762	3.37435	1.16665	2.89235	0.00382366	0.0216995	TIS UP
Trim29	4.40167	3.36652	1.31827	2.55375	0.0106571	0.0484498	TIS UP
Ereg	60.1707	3.36355	0.628457	5.35208	8.69469e-08	2.84619e-06	TIS UP
Ltbr	97.9058	3.36141	0.379344	8.86112	7.92116e-19	4.71366e-16	TIS UP
Col5a1	263.635	3.3562	0.563607	5.95486	2.60302e-09	1.42202e-07	TIS UP
Vasn	131.727	3.35255	0.60734	5.52005	3.389e-08	1.31015e-06	TIS UP
Ltbp2	151.287	3.35107	0.735857	4.55396	5.26442e-06	9.45212e-05	TIS UP
Ms4a6d	69.1145	3.34852	0.693751	4.82669	1.38822e-06	3.08408e-05	TIS UP
S100a7a	5.57395	3.34848	1.26777	2.64123	0.00826061	0.0395399	TIS UP
Galnt18	15.9163	3.34038	1.03351	3.23208	0.00122892	0.00863246	TIS UP
Adcy6	150.28	3.33956	0.922912	3.61851	0.000296309	0.00266438	TIS UP
Lbp	10.5002	3.33419	0.956588	3.4855	0.000491218	0.00406591	TIS UP
Loxl1	97.593	3.33359	0.435853	7.64842	2.03463e-14	4.18532e-12	TIS UP
Ebi3	67.9307	3.33139	0.669476	4.97612	6.48705e-07	1.60367e-05	TIS UP
Fosl1	153.825	3.33018	0.552887	6.02325	1.70949e-09	9.82188e-08	TIS UP
Ptgfrn	198.576	3.33004	0.305276	10.9083	1.05214e-27	4.3827e-24	TIS UP
Ank2	76.794	3.32991	0.594616	5.6001	2.14222e-08	8.77475e-07	TIS UP
Tead4	13.2396	3.32687	0.934282	3.56088	0.000369613	0.00318433	TIS UP
Tnxb	18.913	3.32627	0.703567	4.72772	2.27056e-06	4.63061e-05	TIS UP
Try5	26.6434	3.32621	1.20795	2.7536	0.00589444	0.0306055	TIS UP
Ctgf	178.15	3.32586	0.611166	5.44182	5.27376e-08	1.88161e-06	TIS UP
Ifi202b	65.9167	3.32507	0.828433	4.01368	5.97785e-05	0.00070791	TIS UP
Scara3	13.8688	3.32411	0.872155	3.81137	0.000138198	0.00141095	TIS UP
Dhrs9	22.1623	3.32041	0.916698	3.62214	0.000292177	0.00263434	TIS UP
Gm2115	40.7398	3.31448	0.853284	3.88438	0.000102591	0.00109446	TIS UP
Nynrin	7.55076	3.3119	0.994471	3.33032	0.000867472	0.0064526	TIS UP
Cyp26b1	26.4127	3.30998	0.701411	4.71902	2.36981e-06	4.77925e-05	TIS UP
Gli3	20.5781	3.3091	1.1398	2.90324	0.00369325	0.0211305	TIS UP
Schip1	16.8486	3.30814	1.05231	3.14369	0.00166835	0.0111016	TIS UP
Serpinf1	807.209	3.30793	0.422915	7.82175	5.20959e-15	1.2765e-12	TIS UP
Rpl39l	125.913	3.30736	0.622633	5.3119	1.0849e-07	3.40427e-06	TIS UP
Gpc1	533.187	3.30703	0.616497	5.36422	8.12983e-08	2.70134e-06	TIS UP
Gm7910	17.2234	3.30672	0.905813	3.65055	0.000261675	0.00240354	TIS UP
En1	17.4587	3.30599	0.889883	3.71508	0.000203139	0.00194126	TIS UP
Pros1	63.8885	3.3038	0.477595	6.91759	4.59391e-12	5.27888e-10	TIS UP
Sox9	63.5378	3.29946	0.725242	4.54947	5.37818e-06	9.58409e-05	TIS UP
Wdr63	8.6654	3.29108	1.23766	2.65912	0.00783445	0.0380133	TIS UP
Egfr	22.4662	3.2856	0.972472	3.3786	0.000728555	0.0056122	TIS UP
Map9	11.1287	3.28533	1.0665	3.08047	0.00206676	0.013194	TIS UP
Mgat3	8.49902	3.2793	1.05921	3.09598	0.00196165	0.0126539	TIS UP
Fgfr1	169.708	3.27881	0.569791	5.7544	8.69494e-09	4.01316e-07	TIS UP
Rnf217	15.8415	3.27767	0.834044	3.92985	8.49983e-05	0.000949223	TIS UP
Fblim1	49.7797	3.27734	0.662463	4.9472	7.52904e-07	1.82074e-05	TIS UP
Snx7	17.6119	3.27661	0.99911	3.27953	0.0010398	0.00749358	TIS UP
Agap1	62.1674	3.27538	0.614568	5.32957	9.84481e-08	3.1545e-06	TIS UP
5730409E04Rik	49.476	3.27507	0.488931	6.69842	2.10689e-11	2.02919e-09	TIS UP
Lrp1	955.381	3.27221	0.662228	4.94121	7.76382e-07	1.86937e-05	TIS UP
Rai14	157.073	3.27118	0.539299	6.06562	1.31448e-09	7.82211e-08	TIS UP
Anxa3	182.287	3.26852	0.53114	6.15378	7.56565e-10	4.79311e-08	TIS UP
Clmp	20.1036	3.26775	0.699976	4.66837	3.03593e-06	5.86829e-05	TIS UP
Tceal8	51.6473	3.26414	0.648011	5.03716	4.72478e-07	1.22117e-05	TIS UP
Ptrf	347.708	3.26251	0.445163	7.32879	2.32236e-13	3.68526e-11	TIS UP
Klk8	12.0256	3.26247	1.12532	2.89915	0.00374178	0.0213439	TIS UP
Sparc	1377.02	3.26136	0.362657	8.99296	2.4066e-19	1.67078e-16	TIS UP
Ptpro	59.4421	3.26018	0.756777	4.30798	1.6475e-05	0.000243356	TIS UP
Prl2c2	73.2916	3.25996	0.953676	3.41831	0.000630105	0.00499467	TIS UP
Sorbs3	61.6871	3.25518	0.473597	6.8733	6.27314e-12	6.9682e-10	TIS UP
Phldb2	66.1163	3.25392	0.7051	4.61484	3.93401e-06	7.34025e-05	TIS UP
Ephb3	28.6198	3.25382	0.879785	3.69842	0.000216943	0.00204916	TIS UP
Aebp1	666.115	3.25322	0.453412	7.17498	7.23185e-13	1.02116e-10	TIS UP
Usp17lb	5.36654	3.25183	1.24076	2.62083	0.0087717	0.0413321	TIS UP
1700008I05Rik	6.20781	3.25128	1.18837	2.73591	0.00622088	0.0318737	TIS UP
Fgf7	56.3066	3.25104	0.68126	4.77211	1.82308e-06	3.84022e-05	TIS UP
Prkcdbp	21.199	3.24952	0.842469	3.85714	0.00011472	0.00121012	TIS UP
Col6a3	363.735	3.24874	0.491824	6.60549	3.96202e-11	3.60739e-09	TIS UP
Serpinb9b	77.4022	3.24426	0.650593	4.98662	6.14461e-07	1.52581e-05	TIS UP
Tpbg	21.8305	3.24315	0.955667	3.3936	0.000689796	0.00537828	TIS UP
Mxra7	32.0468	3.24258	0.630422	5.14352	2.69643e-07	7.4631e-06	TIS UP
Eva1c	13.9338	3.24214	0.950114	3.41237	0.000644001	0.00508306	TIS UP
Igf2bp1	59.3538	3.23658	0.517464	6.25469	3.98315e-10	2.75383e-08	TIS UP
Zfp37	27.3251	3.23552	0.653995	4.94731	7.52455e-07	1.82074e-05	TIS UP
Tnfrsf9	104.726	3.23418	0.568327	5.6907	1.2652e-08	5.59171e-07	TIS UP
Timp1	65.9488	3.22762	0.581739	5.54822	2.88588e-08	1.13944e-06	TIS UP
Mrc2	132.363	3.22706	0.480855	6.71109	1.93173e-11	1.88225e-09	TIS UP
Klf5	14.9101	3.22497	0.765581	4.21245	2.52616e-05	0.000344161	TIS UP
Mmp28	24.1377	3.2244	0.714603	4.51215	6.41725e-06	0.00011131	TIS UP
Eif2s3y	29.0335	3.21959	0.724251	4.44541	8.77251e-06	0.000144292	TIS UP
Dlc1	10.1518	3.21923	1.17613	2.73714	0.00619761	0.0318021	TIS UP
Cacna2d1	16.7423	3.21886	0.824967	3.9018	9.5479e-05	0.0010337	TIS UP
Wwtr1	92.8587	3.21838	0.54789	5.87414	4.25056e-09	2.17248e-07	TIS UP
Adamtsl5	75.8542	3.21779	0.501677	6.41406	1.41698e-10	1.11366e-08	TIS UP
Cdr2l	27.8989	3.21732	0.930896	3.45616	0.000547938	0.00443606	TIS UP
Slco3a1	27.8483	3.20866	0.762496	4.20811	2.57519e-05	0.000349982	TIS UP
Pmp22	47.2079	3.20788	0.871588	3.68051	0.000232771	0.00217157	TIS UP
Pard3	85.4328	3.20761	0.78657	4.07797	4.543e-05	0.000566583	TIS UP
Mgam	31.6183	3.20518	1.22285	2.62108	0.00876512	0.0413255	TIS UP
Adamts1	45.1234	3.2047	0.704184	4.55094	5.34068e-06	9.54114e-05	TIS UP
Angptl2	384.792	3.19919	0.520471	6.14672	7.90993e-10	4.97341e-08	TIS UP
2200002D01Rik	15.3559	3.19856	0.809523	3.95117	7.77713e-05	0.000880915	TIS UP
Pls3	140.554	3.19839	0.548804	5.82792	5.61219e-09	2.71044e-07	TIS UP
Slurp1	7.63581	3.19745	1.20628	2.65067	0.00803328	0.0387075	TIS UP
Cttn	224.666	3.19496	0.475743	6.71572	1.87143e-11	1.85605e-09	TIS UP
Disp2	11.5831	3.19365	0.965683	3.30714	0.000942526	0.00691214	TIS UP
Cd36	533.994	3.19327	1.11289	2.86936	0.00411301	0.0230279	TIS UP
Epb4.1l3	81.9589	3.19286	0.530397	6.01976	1.74671e-09	9.96701e-08	TIS UP
Mecom	18.4486	3.1922	0.840115	3.79972	0.000144861	0.00147535	TIS UP
Hrc	48.6183	3.18661	1.20851	2.6368	0.0083691	0.0398451	TIS UP
Armcx1	19.832	3.18623	0.796724	3.99916	6.35676e-05	0.000745364	TIS UP
Cela1	12.0205	3.18592	0.833945	3.8203	0.000133289	0.00137006	TIS UP
Ankrd1	42.2202	3.17903	0.726157	4.37789	1.19835e-05	0.000185393	TIS UP
Axl	714.123	3.17768	0.450168	7.05887	1.6786e-12	2.15145e-10	TIS UP
Ccl9	1172.09	3.17508	0.675623	4.69949	2.60812e-06	5.17337e-05	TIS UP
Lipc	136.35	3.17331	0.826979	3.83723	0.000124429	0.00129254	TIS UP
Neurl1a	8.91682	3.17258	1.19679	2.65091	0.00802759	0.0386913	TIS UP
Dcn	34.2046	3.17208	1.07215	2.95862	0.00309015	0.0182517	TIS UP
Fam149a	30.0337	3.17096	0.729853	4.34466	1.39495e-05	0.000211681	TIS UP
Ctnnd1	541.285	3.1682	1.07792	2.93918	0.00329087	0.0192192	TIS UP
Zfhx4	22.372	3.15857	0.655063	4.82178	1.42285e-06	3.13591e-05	TIS UP
Tead3	23.6666	3.15645	0.647479	4.87498	1.08817e-06	2.5043e-05	TIS UP
Bcl2a1b	43.3136	3.15069	0.940584	3.34972	0.000808944	0.00609943	TIS UP
Fam198b	109.797	3.14869	0.362119	8.69517	3.46325e-18	1.6972e-15	TIS UP
Figf	12.2856	3.14303	0.912948	3.44272	0.000575889	0.00464221	TIS UP
Nid1	737.709	3.14224	0.530747	5.92042	3.21127e-09	1.72046e-07	TIS UP
Xlr	20.4045	3.14176	0.801088	3.92186	8.78671e-05	0.00097214	TIS UP
Ces2g	107.859	3.1377	0.382025	8.21334	2.15128e-16	7.02835e-14	TIS UP
Adprhl1	25.9435	3.13715	0.743939	4.21694	2.47639e-05	0.000338819	TIS UP
Nexn	14.5115	3.1335	0.97448	3.21556	0.0013019	0.00907247	TIS UP
Fn1	4938.37	3.12825	0.404927	7.72548	1.11431e-14	2.54337e-12	TIS UP
Ddah1	27.603	3.1247	0.982144	3.18151	0.00146509	0.00999238	TIS UP
Plin4	15.4653	3.11334	0.849641	3.6643	0.000248013	0.0022945	TIS UP
Tpm2	76.787	3.11197	0.600957	5.17835	2.23853e-07	6.36492e-06	TIS UP
Gm15128	11.6401	3.10932	1.15365	2.6952	0.00703459	0.0351863	TIS UP
Hoxd8	15.6398	3.09958	0.851212	3.64138	0.000271185	0.00247453	TIS UP
Timp3	71.9161	3.09714	0.70079	4.41949	9.89319e-06	0.000158482	TIS UP
Ly6c1	99.1683	3.0952	0.351208	8.81301	1.21829e-18	6.99969e-16	TIS UP
Ifitm10	7.33069	3.09505	1.07837	2.87012	0.0041032	0.0229961	TIS UP
Cyp2c55	52.3114	3.08955	0.678562	4.55308	5.28668e-06	9.48189e-05	TIS UP
Cyp2ab1	36.3779	3.08917	0.666935	4.63189	3.6235e-06	6.82972e-05	TIS UP
3830403N18Rik	26.7649	3.08789	0.885923	3.4855	0.000491211	0.00406591	TIS UP
Armcx2	118.018	3.08275	0.814417	3.78523	0.000153568	0.00155083	TIS UP
Gm5575	386.917	3.08055	0.692349	4.44941	8.61058e-06	0.000141768	TIS UP
Nipal1	13.737	3.07594	0.82446	3.73085	0.000190834	0.00184865	TIS UP
Exoc3l4	12.4759	3.07513	0.880014	3.49441	0.000475103	0.00395808	TIS UP
Glt28d2	9.23747	3.07373	1.11158	2.76518	0.00568915	0.0298277	TIS UP
Serpinb8	16.1746	3.07351	0.822022	3.73897	0.000184778	0.00180045	TIS UP
Flrt2	17.7764	3.07326	0.727281	4.22568	2.38221e-05	0.000328852	TIS UP
Stk39	27.8421	3.07268	0.656922	4.67739	2.90553e-06	5.65559e-05	TIS UP
Sh3d19	73.5017	3.06678	0.478248	6.41253	1.43129e-10	1.11963e-08	TIS UP
Osgin1	315.311	3.06514	0.499109	6.14123	8.18863e-10	5.11007e-08	TIS UP
Epb4.1l4a	20.8719	3.06458	0.868793	3.5274	0.000419664	0.00355669	TIS UP
Il1r1	12.2983	3.06355	0.77516	3.95215	7.74508e-05	0.000877881	TIS UP
Hpn	6.25405	3.06216	1.17033	2.6165	0.00888373	0.0417784	TIS UP
Ptpn3	23.1412	3.05961	0.815493	3.75185	0.000175533	0.00172245	TIS UP
Hbegf	67.86	3.05563	0.57087	5.35259	8.67039e-08	2.84382e-06	TIS UP
Wtip	33.2608	3.05045	0.653331	4.66907	3.0257e-06	5.86212e-05	TIS UP
Gpr162	38.4963	3.04876	0.721223	4.22721	2.36604e-05	0.000327161	TIS UP
Usp17le	11.3903	3.04796	0.961672	3.16944	0.00152734	0.0103365	TIS UP
Gm8909	23.8128	3.04786	0.806757	3.77791	0.000158149	0.00158073	TIS UP
Camk1	36.3251	3.0466	0.541749	5.62365	1.86967e-08	7.78809e-07	TIS UP
Sardh	52.6375	3.04169	0.705667	4.31037	1.62981e-05	0.0002416	TIS UP
Rorc	10.7268	3.04145	0.978721	3.10758	0.00188628	0.0122579	TIS UP
Cav1	201.304	3.03725	0.593294	5.11929	3.06688e-07	8.33612e-06	TIS UP
Abca9	65.8523	3.03495	0.751518	4.03843	5.38109e-05	0.000647362	TIS UP
Prune2	29.557	3.03491	0.720782	4.21058	2.54712e-05	0.000346733	TIS UP
Hspg2	727.051	3.03441	0.386258	7.85593	3.9681e-15	1.00177e-12	TIS UP
Serpina3g	382.255	3.03363	0.777283	3.90287	9.50607e-05	0.00102984	TIS UP
Amot	33.8714	3.03334	0.933857	3.24819	0.00116143	0.00822082	TIS UP
Epb4.1l1	144.757	3.02808	0.621907	4.86902	1.12154e-06	2.56691e-05	TIS UP
Clip3	47.0847	3.02521	0.958263	3.15698	0.00159414	0.0106909	TIS UP
F2r	119.148	3.02289	0.333286	9.06995	1.19071e-19	8.62595e-17	TIS UP
Fzd2	20.6375	3.02267	0.718594	4.20636	2.59513e-05	0.000352405	TIS UP
Prdm1	445.505	3.02192	0.670982	4.50373	6.67723e-06	0.000115172	TIS UP
Dok2	78.0808	3.0219	0.593426	5.09229	3.53766e-07	9.37115e-06	TIS UP
Evc	14.0445	3.02125	1.14761	2.63264	0.00847232	0.0402699	TIS UP
Gpr124	61.5229	3.01706	0.581702	5.1866	2.14162e-07	6.13123e-06	TIS UP
Efna5	22.9167	3.01548	0.954075	3.16063	0.00157429	0.0105854	TIS UP
Cgnl1	132.607	3.01507	0.322343	9.3536	8.47139e-21	7.84169e-18	TIS UP
Als2cl	57.8197	3.01426	0.558101	5.40092	6.63007e-08	2.28244e-06	TIS UP
1810011O10Rik	25.0512	3.01289	0.814091	3.70093	0.000214811	0.00203247	TIS UP
Mtus1	19.4674	3.01176	1.14072	2.64022	0.00828523	0.0396107	TIS UP
Igkv6-20	14.5226	3.01125	1.03908	2.89799	0.00375564	0.0214083	TIS UP
Bmper	10.7474	3.01097	1.03896	2.89805	0.00375487	0.0214083	TIS UP
Col4a6	223.898	3.00904	0.43335	6.94368	3.82018e-12	4.57927e-10	TIS UP
Slc6a15	9.53288	3.0079	0.984559	3.05508	0.00225003	0.0141632	TIS UP
Tns4	31.5859	3.00474	0.85782	3.50277	0.000460453	0.00385531	TIS UP
Dlx2	24.4398	3.00289	0.731474	4.10525	4.03872e-05	0.000514081	TIS UP
Ddr2	140.855	3.00176	0.388723	7.72211	1.14422e-14	2.57635e-12	TIS UP
Pla2r1	16.7289	3.00066	1.04572	2.86948	0.00411144	0.0230268	TIS UP
Slc25a24	58.3653	2.99778	0.642275	4.66744	3.0497e-06	5.88808e-05	TIS UP
Ccdc80	25.9246	2.99694	0.815448	3.6752	0.000237661	0.00220853	TIS UP
Ptprf	62.0601	2.99589	0.477953	6.26817	3.65323e-10	2.54687e-08	TIS UP
Cyp1b1	130.205	2.99537	0.486578	6.15598	7.46134e-10	4.74507e-08	TIS UP
Ccdc136	26.7876	2.99476	0.71666	4.17878	2.93083e-05	0.000389733	TIS UP
Siglech	24.7194	2.99342	0.666372	4.49211	7.05204e-06	0.000120514	TIS UP
Mdfic	57.3209	2.98083	0.703537	4.23692	2.26609e-05	0.000315171	TIS UP
Gm15645	17.3789	2.97927	0.990569	3.00763	0.00263289	0.0160796	TIS UP
Hydin	9.41683	2.97458	1.169	2.54457	0.0109414	0.0494499	TIS UP
Dlg5	85.8203	2.97408	0.752384	3.95287	7.7218e-05	0.000875838	TIS UP
Ece2	13.9799	2.97327	1.00909	2.94647	0.00321424	0.0188709	TIS UP
Etv1	19.183	2.96958	0.788366	3.76676	0.000165381	0.00164022	TIS UP
Pdgfra	127.645	2.96937	0.506494	5.86261	4.55655e-09	2.27309e-07	TIS UP
Shox2	32.0799	2.96163	0.985596	3.00492	0.00265654	0.0161958	TIS UP
Fcgrt	67.1946	2.95901	0.525304	5.63295	1.77158e-08	7.41659e-07	TIS UP
Thbs1	312.727	2.95862	0.489107	6.04902	1.45731e-09	8.55739e-08	TIS UP
Lrrc32	876.152	2.9485	0.429421	6.86621	6.59306e-12	7.17997e-10	TIS UP
Pdgfrl	11.1597	2.94809	0.917919	3.21171	0.00131947	0.00915664	TIS UP
Hoxc6	8.92347	2.94774	0.888338	3.31827	0.000905777	0.00668114	TIS UP
Ptgs1	255.477	2.94693	0.536744	5.49038	4.01077e-08	1.49502e-06	TIS UP
Nr2f2	44.2394	2.94513	0.66113	4.45469	8.40159e-06	0.000139152	TIS UP
Pla2g4a	156.526	2.94268	0.503077	5.84936	4.93473e-09	2.43262e-07	TIS UP
Meis1	17.3689	2.9399	0.743023	3.95668	7.59988e-05	0.000862597	TIS UP
Kirrel	110.846	2.93965	0.526002	5.58868	2.28805e-08	9.25327e-07	TIS UP
C77080	165.484	2.93606	0.287272	10.2205	1.60523e-24	2.43149e-21	TIS UP
Dab2	125.459	2.93539	0.587214	4.99885	5.76737e-07	1.45486e-05	TIS UP
Sh3rf3	15.6145	2.93026	0.722989	4.05298	5.05692e-05	0.00061773	TIS UP
Adamts4	13.5959	2.92979	0.880001	3.32931	0.000870618	0.00647022	TIS UP
Lpar3	14.2108	2.92879	0.880551	3.32608	0.000880755	0.00652809	TIS UP
Hsd17b14	57.7011	2.92856	0.902137	3.24625	0.00116936	0.00826291	TIS UP
Fmn1	36.1081	2.92799	0.840314	3.4844	0.000493244	0.00407333	TIS UP
Tagln	48.2402	2.92685	0.538292	5.43729	5.4098e-08	1.92192e-06	TIS UP
Prrx1	123.569	2.9267	0.750386	3.90026	9.60892e-05	0.00103829	TIS UP
Cttnbp2nl	59.8298	2.92465	0.492263	5.94123	2.82892e-09	1.53037e-07	TIS UP
Slc6a12	8.04383	2.92297	1.03183	2.8328	0.00461421	0.0251907	TIS UP
Sestd1	42.1894	2.92258	0.49043	5.95921	2.53454e-09	1.38916e-07	TIS UP
Myo1f	206.646	2.92174	0.558334	5.23296	1.6682e-07	4.92829e-06	TIS UP
Mageb7-ps	6.57231	2.92024	1.13776	2.56667	0.0102681	0.0470665	TIS UP
Efna3	18.524	2.91915	0.747262	3.90646	9.36568e-05	0.00101944	TIS UP
Tspan7	77.5819	2.91817	0.676706	4.31232	1.61548e-05	0.000239903	TIS UP
Fnbp1l	51.1745	2.91716	0.448284	6.50739	7.64698e-11	6.46772e-09	TIS UP
Cd80	954.548	2.91587	0.420462	6.93492	4.06465e-12	4.75018e-10	TIS UP
Cacna1g	21.1571	2.91408	1.00712	2.89348	0.00381	0.0216454	TIS UP
Tmem176b	814.509	2.91226	0.408073	7.13661	9.56637e-13	1.28544e-10	TIS UP
Arhgef5	16.3612	2.91188	0.891406	3.26661	0.00108842	0.00778669	TIS UP
Ston1	29.6401	2.91022	0.681901	4.26781	1.97401e-05	0.000281842	TIS UP
Dusp4	177.41	2.90522	0.411487	7.06029	1.66152e-12	2.14607e-10	TIS UP
Lrp12	45.6166	2.90472	0.815702	3.56101	0.000369437	0.00318433	TIS UP
Setbp1	45.5285	2.90452	0.662644	4.38322	1.16935e-05	0.000181245	TIS UP
Gm2427	407.665	2.90372	0.482715	6.0154	1.79439e-09	1.02042e-07	TIS UP
Nrp2	1611.16	2.9014	0.975277	2.97495	0.0029304	0.017513	TIS UP
Pcdhb5	9.26503	2.89935	0.871358	3.3274	0.000876618	0.00650611	TIS UP
Cfap46	8.0813	2.89922	1.13262	2.55975	0.0104749	0.0478301	TIS UP
Lgals3	941.341	2.89858	0.317532	9.12847	6.94747e-20	5.26176e-17	TIS UP
Unc5b	78.0835	2.89414	0.427215	6.77444	1.24887e-11	1.29246e-09	TIS UP
Shisa7	31.0269	2.89358	0.764442	3.78522	0.000153575	0.00155083	TIS UP
Ncam1	16.477	2.89257	0.695563	4.15861	3.20192e-05	0.000418763	TIS UP
App	419.691	2.88464	0.329215	8.76218	1.91516e-18	1.0523e-15	TIS UP
C1qtnf6	58.3725	2.88142	0.674663	4.2709	1.94689e-05	0.000279406	TIS UP
Cd34	272.893	2.88057	0.495036	5.81891	5.92314e-09	2.81975e-07	TIS UP
Gpnmb	753.673	2.87566	0.480718	5.98202	2.20393e-09	1.23642e-07	TIS UP
Ncan	19.853	2.87047	0.793682	3.61665	0.000298435	0.00267628	TIS UP
Dnah10	16.4014	2.86947	0.993991	2.88682	0.00389158	0.0219827	TIS UP
Glt1d1	33.3724	2.86824	0.859975	3.33526	0.000852187	0.00636162	TIS UP
Serpinb7	85.8255	2.86679	0.601108	4.76918	1.8498e-06	3.89159e-05	TIS UP
Serpinh1	517.776	2.86659	0.538392	5.32436	1.01311e-07	3.22762e-06	TIS UP
Anpep	82.2805	2.8665	0.494482	5.79697	6.75254e-09	3.17827e-07	TIS UP
Galm	22.7006	2.86548	0.617205	4.64268	3.43927e-06	6.53421e-05	TIS UP
Cntln	7.52736	2.86157	1.01314	2.82446	0.00473597	0.0256453	TIS UP
Twist1	14.5544	2.86062	0.990372	2.88843	0.00387165	0.0219121	TIS UP
C1s1	58.5935	2.85385	0.723773	3.94302	8.04619e-05	0.000906461	TIS UP
Gnao1	55.5042	2.85199	0.601697	4.73991	2.13818e-06	4.38748e-05	TIS UP
Mnda	28.403	2.85055	0.604081	4.71882	2.37213e-06	4.77925e-05	TIS UP
Slc4a3	26.9321	2.84987	0.869271	3.27845	0.00104378	0.00751573	TIS UP
Des	35.5686	2.84725	0.76852	3.70484	0.000211521	0.00200704	TIS UP
Id1	89.7833	2.84281	0.488439	5.8202	5.8779e-09	2.80623e-07	TIS UP
Arhgap22	125.671	2.84222	0.494387	5.74899	8.97794e-09	4.13233e-07	TIS UP
Gfpt2	23.2535	2.84163	0.958741	2.96392	0.00303748	0.0180044	TIS UP
Ms4a6c	541.102	2.84124	0.498131	5.70381	1.17162e-08	5.20574e-07	TIS UP
Fgf10	21.6241	2.835	0.950962	2.98119	0.00287131	0.0172527	TIS UP
Glipr1	1773.16	2.83388	0.431676	6.56482	5.2094e-11	4.56837e-09	TIS UP
Tmem98	127.504	2.83362	0.608008	4.6605	3.15448e-06	6.04833e-05	TIS UP
H60c	7.9406	2.83304	1.00314	2.82416	0.00474042	0.0256611	TIS UP
Gpr183	17.3058	2.83119	0.850592	3.32849	0.000873173	0.00648342	TIS UP
Scn1b	14.4684	2.83032	0.779054	3.63303	0.000280117	0.00254349	TIS UP
Rbfox2	126.824	2.82995	0.455862	6.20791	5.36945e-10	3.62317e-08	TIS UP
Iglv2	37.4477	2.82933	0.741771	3.81428	0.000136578	0.00139697	TIS UP
Yap1	203.319	2.82894	0.677716	4.17423	2.98991e-05	0.000396009	TIS UP
Bglap2	14.8753	2.82814	0.772841	3.65941	0.0002528	0.00233231	TIS UP
Tfpi	18.3924	2.82528	1.00764	2.80387	0.00504929	0.0269911	TIS UP
Smpd5	22.1714	2.82379	0.86506	3.26427	0.00109746	0.00783795	TIS UP
Zcchc14	216.398	2.82252	0.655318	4.3071	1.65406e-05	0.000243894	TIS UP
Basp1	113.906	2.8188	0.483067	5.83523	5.37175e-09	2.60186e-07	TIS UP
Rcn3	92.4492	2.81665	0.520803	5.40828	6.36342e-08	2.2089e-06	TIS UP
Krt80	135.1	2.81545	0.501215	5.61724	1.9403e-08	8.04212e-07	TIS UP
Bdh2	12.2425	2.81524	0.784193	3.58999	0.000330692	0.00291706	TIS UP
Fggy	31.8076	2.81522	0.795333	3.53968	0.000400616	0.0034161	TIS UP
Steap1	27.3855	2.81317	0.782125	3.59683	0.000322113	0.00285055	TIS UP
Ghr	35.8378	2.81104	0.756698	3.71487	0.000203307	0.00194126	TIS UP
Asic1	37.5449	2.81094	0.770422	3.64857	0.000263708	0.00241955	TIS UP
Ttll7	51.4309	2.81025	0.690892	4.06757	4.75052e-05	0.000586754	TIS UP
Tspan9	94.9373	2.80978	0.695581	4.03947	5.35721e-05	0.000644955	TIS UP
Emilin2	106.663	2.80851	0.701057	4.0061	6.17297e-05	0.000725857	TIS UP
Slc39a4	130.559	2.80428	0.695952	4.02942	5.59151e-05	0.000670257	TIS UP
Gab1	87.8435	2.80166	0.396024	7.07447	1.50018e-12	1.95281e-10	TIS UP
Ly6a	2238	2.79965	0.541797	5.16734	2.37444e-07	6.69424e-06	TIS UP
Olfm1	89.8321	2.79924	0.686178	4.07947	4.51385e-05	0.000563791	TIS UP
Bcl3	400.8	2.79722	0.462926	6.04247	1.51774e-09	8.87319e-08	TIS UP
Me1	59.9092	2.79636	0.678851	4.11926	3.80096e-05	0.000487541	TIS UP
Lpar1	129.91	2.79605	0.489258	5.71488	1.09784e-08	4.90409e-07	TIS UP
Pde6h	137.993	2.7953	0.922255	3.03094	0.00243795	0.015112	TIS UP
Ptges	181.683	2.7947	0.651163	4.29186	1.77184e-05	0.000257837	TIS UP
Dtna	22.302	2.79329	0.756733	3.69125	0.000223158	0.00209715	TIS UP
Bace1	21.2959	2.78963	0.819601	3.40364	0.000664931	0.00522598	TIS UP
Pcdh9	27.7355	2.78635	1.03295	2.69748	0.00698674	0.0349799	TIS UP
Ifitm2	556.004	2.78551	0.348035	8.00352	1.20913e-15	3.41467e-13	TIS UP
Hhipl1	21.7863	2.78507	0.719431	3.87121	0.000108295	0.00114858	TIS UP
Abca8b	219.543	2.78234	0.410705	6.77454	1.24801e-11	1.29246e-09	TIS UP
Il9r	100.698	2.77804	0.806864	3.44301	0.000575274	0.0046395	TIS UP
Sgms2	73.6756	2.77655	0.642224	4.32333	1.53689e-05	0.000229676	TIS UP
Pcbp3	41.5094	2.77485	0.580726	4.77824	1.76835e-06	3.75819e-05	TIS UP
Fut7	18.0637	2.77327	1.01379	2.73554	0.00622777	0.0318891	TIS UP
Pcdhgb2	33.8043	2.77	0.669993	4.13437	3.55928e-05	0.000458898	TIS UP
Dnm3	126.16	2.76951	0.539541	5.13309	2.85025e-07	7.811e-06	TIS UP
Anxa2	611.96	2.76876	0.421242	6.57284	4.93654e-11	4.35199e-09	TIS UP
Fndc3b	243.722	2.76438	0.64676	4.27419	1.91833e-05	0.000275783	TIS UP
6030419C18Rik	52.0237	2.76206	0.424774	6.50242	7.90375e-11	6.58462e-09	TIS UP
Zmynd12	17.8007	2.76085	0.701955	3.93308	8.38629e-05	0.000937173	TIS UP
Pde10a	19.8214	2.75755	0.811093	3.39979	0.000674375	0.00527737	TIS UP
Gprc5a	51.442	2.75698	0.426175	6.46912	9.85772e-11	8.05144e-09	TIS UP
Etv4	34.8131	2.75379	0.817842	3.36714	0.000759518	0.00580243	TIS UP
Micall2	828.406	2.75333	0.33562	8.2037	2.33105e-16	7.32829e-14	TIS UP
Medag	68.758	2.74915	0.737805	3.72612	0.000194453	0.00187716	TIS UP
Tmem176a	425.831	2.74878	0.63097	4.35644	1.32196e-05	0.000201708	TIS UP
S100a16	15.2124	2.74306	0.809222	3.38975	0.000699571	0.00543161	TIS UP
Samd4	68.0957	2.74089	0.560572	4.88944	1.01122e-06	2.3532e-05	TIS UP
Mcc	25.0187	2.73897	0.724932	3.77824	0.00015794	0.00158073	TIS UP
Adamts7	20.5854	2.73895	0.725129	3.7772	0.000158602	0.00158335	TIS UP
Grap2	23.0943	2.73894	0.945509	2.89678	0.00377008	0.0214676	TIS UP
Smtnl1	7.66151	2.73866	1.06094	2.58136	0.0098412	0.0454222	TIS UP
Itga5	476.958	2.73737	0.462531	5.91825	3.25377e-09	1.73764e-07	TIS UP
Igkv1-110	116.386	2.73573	1.00344	2.72636	0.00640369	0.0325653	TIS UP
Col16a1	89.3352	2.73334	0.734638	3.72066	0.000198702	0.00190785	TIS UP
Socs3	329.267	2.73063	0.531533	5.13728	2.78744e-07	7.65146e-06	TIS UP
Shroom4	14.6933	2.73017	0.85361	3.19838	0.001382	0.009531	TIS UP
Hmox1	855.379	2.72984	0.263166	10.3731	3.28703e-25	5.47685e-22	TIS UP
Dpep2	97.8165	2.72363	0.6776	4.01953	5.83152e-05	0.000693538	TIS UP
Nckap1	185.137	2.72157	0.433097	6.28398	3.30018e-10	2.32015e-08	TIS UP
Arhgef19	35.0564	2.71785	0.509881	5.33037	9.80149e-08	3.14668e-06	TIS UP
C3	203.354	2.71584	0.492678	5.5124	3.53977e-08	1.35898e-06	TIS UP
Prkcz	318.708	2.71537	0.412932	6.57583	4.83817e-11	4.28796e-09	TIS UP
Saa3	96.1862	2.71536	0.83046	3.2697	0.00107661	0.00772209	TIS UP
Emp1	397.035	2.71256	0.494109	5.4898	4.02378e-08	1.49652e-06	TIS UP
Rcan2	144.907	2.71176	0.395489	6.85673	7.04531e-12	7.62266e-10	TIS UP
Lif	88.3756	2.71026	0.435077	6.22938	4.6827e-10	3.19767e-08	TIS UP
Slc18a1	14.5594	2.70229	0.815511	3.31362	0.000920964	0.00677189	TIS UP
Shisa4	45.4293	2.70164	0.542865	4.97664	6.46976e-07	1.60177e-05	TIS UP
Peli2	23.2631	2.69962	0.743636	3.6303	0.000283096	0.00256495	TIS UP
Csgalnact1	59.9543	2.69633	0.599761	4.49568	6.93489e-06	0.00011911	TIS UP
Dusp26	49.0901	2.69401	0.799013	3.37168	0.000747125	0.00571823	TIS UP
Tmem132a	118.21	2.68769	0.31018	8.66493	4.51808e-18	2.15086e-15	TIS UP
Ctsl	3526.79	2.68743	0.403816	6.65509	2.83135e-11	2.66531e-09	TIS UP
Mmp9	23.0811	2.68684	0.805552	3.3354	0.000851763	0.0063613	TIS UP
Tnfrsf23	271.814	2.68612	0.311657	8.61884	6.76386e-18	3.04593e-15	TIS UP
Acvr1	65.0621	2.68074	0.643428	4.16634	3.09535e-05	0.000407705	TIS UP
Mmp14	1055.06	2.67874	0.945766	2.83234	0.00462081	0.0252102	TIS UP
Rundc3a	141.816	2.67174	0.474012	5.63644	1.73599e-08	7.34139e-07	TIS UP
Zfp760	15.1219	2.67124	0.910689	2.93321	0.00335473	0.0194965	TIS UP
Smad1	47.6795	2.67112	0.561852	4.75414	1.99294e-06	4.15599e-05	TIS UP
Cxx1a	14.5954	2.66451	0.998547	2.66839	0.00762168	0.0371976	TIS UP
Pea15a	428.187	2.66359	0.284452	9.36394	7.68205e-21	7.52932e-18	TIS UP
Myo1b	100.216	2.66214	0.652894	4.07744	4.55335e-05	0.000567449	TIS UP
Nrp1	159.361	2.65885	0.599863	4.43243	9.31775e-06	0.000151171	TIS UP
Rgs16	784.163	2.65786	0.328394	8.09352	5.79641e-16	1.69438e-13	TIS UP
S100a3	22.2334	2.65693	0.848147	3.13263	0.00173248	0.0114278	TIS UP
Npdc1	91.8671	2.65246	0.49736	5.33308	9.65598e-08	3.11798e-06	TIS UP
Tsku	108.282	2.65197	0.53981	4.91277	8.9797e-07	2.13133e-05	TIS UP
Ahnak2	1020.65	2.65194	0.243671	10.8833	1.38482e-27	4.61477e-24	TIS UP
Tiam2	29.9257	2.64574	0.601778	4.39655	1.09986e-05	0.000173049	TIS UP
Sh3bp4	28.5871	2.64412	0.60525	4.36864	1.25024e-05	0.000192706	TIS UP
Emr1	12.613	2.64075	0.888595	2.97183	0.00296031	0.0176348	TIS UP
Adora2b	12.2881	2.63942	0.861379	3.06418	0.00218266	0.0138122	TIS UP
Ston2	27.3052	2.63942	0.701465	3.76272	0.000168075	0.0016624	TIS UP
Cxcr5	1067.94	2.63821	0.496054	5.3184	1.04684e-07	3.3287e-06	TIS UP
Samd14	33.6976	2.6238	0.586722	4.47196	7.75053e-06	0.000130181	TIS UP
Plb1	684.942	2.62268	0.40166	6.52962	6.59385e-11	5.66323e-09	TIS UP
Gata2	11.5816	2.62222	0.809293	3.24013	0.00119474	0.00843152	TIS UP
P2ry2	16.7951	2.62109	0.878082	2.98502	0.00283562	0.0170814	TIS UP
Cd63	1691.98	2.61987	0.313248	8.36358	6.08451e-17	2.20392e-14	TIS UP
Lrp11	156.303	2.61597	0.492021	5.31678	1.05619e-07	3.33621e-06	TIS UP
Arhgap42	21.4955	2.6151	0.857701	3.04896	0.00229634	0.0143841	TIS UP
Arhgef28	23.9113	2.61342	0.801203	3.26187	0.00110679	0.00789776	TIS UP
Pdgfrb	24.7613	2.61177	0.628272	4.15706	3.22363e-05	0.000421272	TIS UP
Rbp1	37.5602	2.61145	0.667845	3.91025	9.21988e-05	0.00100735	TIS UP
Specc1	142.529	2.60787	0.637068	4.09355	4.24816e-05	0.000535422	TIS UP
F3	71.2911	2.60515	0.425874	6.11718	9.5245e-10	5.87767e-08	TIS UP
Map1b	100.014	2.60327	0.428249	6.07888	1.21025e-09	7.25364e-08	TIS UP
Gm13242	14.2913	2.5991	0.926883	2.80413	0.00504532	0.0269785	TIS UP
Nqo1	119.527	2.5949	0.420089	6.17702	6.53242e-10	4.26836e-08	TIS UP
Tinagl1	87.8255	2.59486	0.441903	5.872	4.30569e-09	2.18724e-07	TIS UP
Alcam	242.09	2.59383	0.590691	4.39118	1.1274e-05	0.000176714	TIS UP
Armcx4	21.6909	2.59305	0.96998	2.6733	0.0075108	0.0368444	TIS UP
Atp1a3	88.8695	2.59231	0.685855	3.77967	0.000157035	0.00157432	TIS UP
Scn11a	69.7862	2.59217	0.875299	2.96147	0.00306178	0.0181356	TIS UP
Csf2rb2	476.504	2.59206	0.457117	5.67046	1.42416e-08	6.16345e-07	TIS UP
Cacna1c	20.7444	2.58783	0.888381	2.91298	0.00358002	0.020562	TIS UP
5430435G22Rik	62.6164	2.5849	0.655656	3.94247	8.06463e-05	0.000907925	TIS UP
Gbp8	45.8964	2.58155	0.691239	3.73467	0.000187962	0.0018272	TIS UP
Slc35f3	37.2612	2.58143	0.868909	2.97088	0.00296948	0.0176769	TIS UP
P4ha3	6.96879	2.57881	1.00922	2.55526	0.0106109	0.0482661	TIS UP
Fam160a1	36.9436	2.57274	0.547297	4.70081	2.59127e-06	5.15071e-05	TIS UP
Tgfb3	3653.95	2.57088	0.464523	5.53445	3.12201e-08	1.2154e-06	TIS UP
Slc22a18	21.3049	2.56694	0.645607	3.97601	7.00815e-05	0.000805839	TIS UP
Mb21d2	17.5255	2.56104	0.95112	2.69265	0.00708858	0.0353305	TIS UP
Lilrb4	79.3356	2.56082	0.85371	2.99964	0.00270301	0.0164191	TIS UP
Gjc1	22.6533	2.56035	0.614615	4.16578	3.10291e-05	0.000408378	TIS UP
Rhod	128.895	2.55996	0.669434	3.82407	0.000131267	0.00135407	TIS UP
Gimap3	27.142	2.55529	0.87415	2.92317	0.00346488	0.0200073	TIS UP
Spp1	1927.43	2.55191	0.48331	5.28008	1.2913e-07	4.01412e-06	TIS UP
Lpin3	13.8347	2.54839	0.751598	3.39063	0.000697322	0.00541921	TIS UP
Havcr2	20.1624	2.54758	0.682501	3.73271	0.000189431	0.00183719	TIS UP
Cdh17	1366.18	2.54669	0.32727	7.78164	7.15899e-15	1.70404e-12	TIS UP
Celf5	32.9053	2.54599	0.528356	4.8187	1.44499e-06	3.18051e-05	TIS UP
Slco2a1	112.654	2.54451	0.37826	6.72688	1.73335e-11	1.73982e-09	TIS UP
Vcam1	53.1374	2.54308	0.565667	4.49572	6.93343e-06	0.00011911	TIS UP
Ccr1	163.717	2.54201	0.470918	5.39799	6.73921e-08	2.30572e-06	TIS UP
Rarg	166.236	2.53906	0.357437	7.10351	1.21624e-12	1.59566e-10	TIS UP
Cd52	3096.38	2.53556	0.373994	6.77966	1.20457e-11	1.2623e-09	TIS UP
Kctd17	178.457	2.53366	0.585021	4.33088	1.48513e-05	0.000223132	TIS UP
Sema7a	219.41	2.53184	0.496634	5.09799	3.43276e-07	9.12227e-06	TIS UP
Reck	88.5826	2.52728	0.634029	3.98606	6.71785e-05	0.000777649	TIS UP
Mras	131.687	2.5269	0.66253	3.81402	0.000136724	0.0013976	TIS UP
Ltb	700.561	2.52678	0.581746	4.34345	1.40261e-05	0.000212651	TIS UP
Fcgr3	2011.37	2.52355	0.460154	5.48413	4.15501e-08	1.52827e-06	TIS UP
Fam129b	898.031	2.52131	0.374862	6.72596	1.74444e-11	1.74047e-09	TIS UP
Gm14137	50.7108	2.52099	0.555859	4.53531	5.75178e-06	0.000101845	TIS UP
Laptm4b	132.555	2.52065	0.53107	4.74636	2.07113e-06	4.27622e-05	TIS UP
Plod2	46.2231	2.51474	0.565922	4.44361	8.84616e-06	0.00014536	TIS UP
Mical2	91.7482	2.51048	0.566184	4.43405	9.24811e-06	0.000150187	TIS UP
Cachd1	31.9495	2.5066	0.779669	3.21495	0.00130466	0.00908792	TIS UP
Akr1b7	172.416	2.50644	0.713596	3.51241	0.000444067	0.00374067	TIS UP
Prkg2	31.81	2.50526	0.575038	4.35668	1.32049e-05	0.000201668	TIS UP
Car6	14.8604	2.5043	0.819469	3.056	0.00224312	0.014125	TIS UP
Pdgfa	46.9999	2.4988	0.588398	4.24678	2.16866e-05	0.000304672	TIS UP
Nod2	159.077	2.4981	0.582552	4.2882	1.80129e-05	0.00026121	TIS UP
Mmrn2	30.4854	2.49682	0.789201	3.16373	0.00155762	0.0104988	TIS UP
Ms4a1	3748.54	2.49427	0.430969	5.78758	7.14091e-09	3.32351e-07	TIS UP
2210013O21Rik	37.6068	2.49061	0.712674	3.49474	0.000474527	0.00395692	TIS UP
Fez1	24.2046	2.48608	0.846211	2.93789	0.00330453	0.0192518	TIS UP
Eif5al3-ps	24.3336	2.48359	0.78396	3.168	0.00153492	0.0103752	TIS UP
Cebpd	47.9808	2.48279	0.61129	4.06155	4.87475e-05	0.000599432	TIS UP
Als2cr12	11.0011	2.48226	0.868015	2.85969	0.00424051	0.0236226	TIS UP
Acy3	55.3698	2.4757	0.67462	3.66977	0.000242769	0.00224955	TIS UP
Adcy1	28.6924	2.47522	0.638105	3.87901	0.000104881	0.00111592	TIS UP
Tmem132b	8.91387	2.47039	0.872206	2.83235	0.00462078	0.0252102	TIS UP
6330403A02Rik	283.499	2.46487	0.511099	4.82268	1.41646e-06	3.13011e-05	TIS UP
H60b	36.89	2.46127	0.620553	3.96625	7.30111e-05	0.000834369	TIS UP
Ankrd55	87.6262	2.45921	0.503167	4.88746	1.02143e-06	2.37366e-05	TIS UP
Tnfaip2	120.678	2.45906	0.376819	6.52584	6.76228e-11	5.7781e-09	TIS UP
Eef1a2	486.266	2.45341	0.627367	3.91064	9.20527e-05	0.00100708	TIS UP
Grb14	29.5954	2.44987	0.583674	4.19732	2.70088e-05	0.000365573	TIS UP
Eya1	31.1732	2.43998	0.634961	3.84273	0.000121674	0.00126788	TIS UP
Wnt10b	505.152	2.43707	0.600477	4.05856	4.9377e-05	0.000605386	TIS UP
Osbpl3	30.0556	2.43441	0.776827	3.13379	0.00172566	0.0113918	TIS UP
Xlr3a	18.2387	2.4286	0.799564	3.0374	0.00238628	0.0148525	TIS UP
Gm15127	12.1615	2.42552	0.902348	2.68801	0.00718789	0.0356907	TIS UP
Rnd1	96.1386	2.42493	0.424477	5.71275	1.11163e-08	4.95242e-07	TIS UP
Crim1	289.584	2.42433	0.279908	8.66116	4.66968e-18	2.16128e-15	TIS UP
Dmpk	28.4321	2.42359	0.823175	2.9442	0.00323795	0.0189767	TIS UP
Rxra	69.1264	2.42134	0.545107	4.44196	8.9142e-06	0.000145931	TIS UP
Cd300lb	12.6991	2.40661	0.93376	2.57733	0.00995662	0.0458153	TIS UP
Mmp19	30.7946	2.40442	0.477779	5.03248	4.84176e-07	1.24882e-05	TIS UP
Ogdhl	179.565	2.39964	0.30422	7.88785	3.07433e-15	8.01631e-13	TIS UP
Pla2g16	226.621	2.39071	0.342115	6.98803	2.78763e-12	3.39033e-10	TIS UP
Spaca6	13.6067	2.3897	0.893958	2.67316	0.00751393	0.0368444	TIS UP
Cngb1	9.08309	2.3858	0.864567	2.75953	0.00578852	0.0302346	TIS UP
H2-DMb2	2956.1	2.38429	0.3278	7.27363	3.49958e-13	5.39907e-11	TIS UP
Rin2	82.6604	2.38167	0.593055	4.01594	5.92085e-05	0.000702158	TIS UP
Tjp1	171.583	2.38112	0.545643	4.36387	1.27779e-05	0.000196045	TIS UP
Fcgr4	78.1156	2.38077	0.686907	3.46593	0.000528406	0.00429898	TIS UP
Dysf	28.9076	2.37842	0.620091	3.8356	0.000125258	0.00129953	TIS UP
Strip2	34.5861	2.37346	0.760967	3.119	0.00181465	0.0118757	TIS UP
Loxl3	47.3468	2.3721	0.585856	4.04895	5.14484e-05	0.000624351	TIS UP
Cav2	52.1671	2.36365	0.694024	3.40572	0.000659903	0.00518891	TIS UP
Lynx1	174.829	2.36313	0.33742	7.00353	2.49598e-12	3.05794e-10	TIS UP
Ppapdc3	84.5468	2.35769	0.45841	5.14318	2.70126e-07	7.46407e-06	TIS UP
Rab32	49.7629	2.35456	0.699778	3.36473	0.000766184	0.00583462	TIS UP
Cd300ld	123.219	2.35415	0.782319	3.0092	0.00261936	0.0160168	TIS UP
Emp2	143.482	2.35307	0.453948	5.18356	2.17694e-07	6.20037e-06	TIS UP
Sepp1	3913.89	2.35183	0.379945	6.18993	6.01907e-10	3.99871e-08	TIS UP
Phlda3	1360.59	2.3509	0.377601	6.22588	4.78861e-10	3.25665e-08	TIS UP
Tacc2	117.759	2.35003	0.545936	4.30459	1.67297e-05	0.000245938	TIS UP
Pgm5	319.951	2.34766	0.761136	3.08441	0.00203954	0.0130452	TIS UP
Fam102a	833.631	2.34765	0.385401	6.09144	1.11897e-09	6.82942e-08	TIS UP
Tmlhe	32.9959	2.34543	0.594026	3.94836	7.86874e-05	0.000890081	TIS UP
Ifi204	60.1228	2.34278	0.51	4.59368	4.35497e-06	8.01796e-05	TIS UP
Oosp1	42.8746	2.34016	0.73678	3.1762	0.00149218	0.0101475	TIS UP
Pld2	108.018	2.32778	0.443072	5.25373	1.49047e-07	4.5071e-06	TIS UP
Inhba	37.797	2.32566	0.735866	3.16044	0.00157529	0.0105879	TIS UP
Pbx1	38.6846	2.3247	0.771183	3.01446	0.00257435	0.0157988	TIS UP
Dlx1	16.996	2.32418	0.800569	2.90316	0.00369422	0.0211305	TIS UP
Aldh3a1	139.098	2.32253	0.594539	3.90644	9.36659e-05	0.00101944	TIS UP
Vcan	331.127	2.32218	0.465535	4.98819	6.09485e-07	1.52025e-05	TIS UP
Bok	35.9206	2.31839	0.660275	3.51124	0.000446015	0.00375329	TIS UP
Jup	197.562	2.31636	0.48534	4.77265	1.81818e-06	3.83474e-05	TIS UP
Crisp3	54.2587	2.31618	0.690743	3.35318	0.000798896	0.00603956	TIS UP
Gsap	314.242	2.30998	0.462307	4.99663	5.83393e-07	1.46614e-05	TIS UP
Morn4	27.5949	2.30731	0.511098	4.51443	6.34882e-06	0.000110422	TIS UP
Ier3	181.824	2.30677	0.306364	7.52951	5.09307e-14	9.64326e-12	TIS UP
Casp4	152.633	2.3059	0.575069	4.00978	6.07758e-05	0.000716664	TIS UP
Ccdc102a	32.0298	2.30489	0.677675	3.40118	0.000670965	0.00525605	TIS UP
Rin1	125.672	2.2976	0.417826	5.49893	3.82112e-08	1.44044e-06	TIS UP
Gbp2	1556.11	2.29727	0.600756	3.82397	0.000131322	0.00135407	TIS UP
Rec8	126.805	2.29419	0.544981	4.20967	2.55739e-05	0.000347846	TIS UP
Ttyh2	164.501	2.29384	0.384603	5.96417	2.45875e-09	1.35207e-07	TIS UP
Mapk8ip1	47.4006	2.29363	0.511871	4.48088	7.43366e-06	0.00012613	TIS UP
Dse	45.6377	2.29186	0.793848	2.88703	0.00388901	0.0219827	TIS UP
Rgmb	114.862	2.29162	0.564688	4.0582	4.94516e-05	0.000605855	TIS UP
Ms4a4c	1299.16	2.29074	0.391901	5.84519	5.05984e-09	2.47042e-07	TIS UP
Klc3	27.2786	2.28939	0.732539	3.12529	0.00177633	0.0116663	TIS UP
Gm22	20.3501	2.28316	0.645113	3.53916	0.00040141	0.00342112	TIS UP
Peg3	33.677	2.28192	0.719883	3.16985	0.00152517	0.010326	TIS UP
Plscr1	23.2852	2.28166	0.551879	4.13435	3.55965e-05	0.000458898	TIS UP
Apobr	34.8006	2.27958	0.638608	3.56961	0.00035752	0.00309997	TIS UP
Cish	23.8376	2.27881	0.581332	3.91998	8.85571e-05	0.000979008	TIS UP
Wnt9a	13.0714	2.27878	0.724876	3.14368	0.00166837	0.0111016	TIS UP
H2-DMa	1971.75	2.27778	0.387229	5.88226	4.04713e-09	2.08772e-07	TIS UP
Lrfn3	20.5674	2.27309	0.687819	3.30478	0.000950498	0.00695835	TIS UP
Eda2r	160.274	2.2694	0.461433	4.91815	8.73646e-07	2.0825e-05	TIS UP
P2ry6	13.8172	2.26939	0.87193	2.60272	0.00924869	0.0431174	TIS UP
Ldhb	72.2991	2.26927	0.4857	4.67216	2.98053e-06	5.78807e-05	TIS UP
Grb10	267.666	2.268	0.379174	5.98143	2.21193e-09	1.23675e-07	TIS UP
Pgf	28.1523	2.26184	0.644863	3.50748	0.000452376	0.00379723	TIS UP
Add2	20.6946	2.26102	0.855065	2.64427	0.00818683	0.0393336	TIS UP
Tcf7l1	49.0145	2.25993	0.873072	2.58848	0.00964006	0.0446023	TIS UP
Rpl19-ps12	12.4641	2.25988	0.883705	2.55728	0.0105494	0.0481047	TIS UP
Nbl1	40.0149	2.25667	0.508204	4.44048	8.97576e-06	0.000146622	TIS UP
Tgm2	587.162	2.25269	0.571005	3.94513	7.9757e-05	0.000901275	TIS UP
Ptgir	191.92	2.25031	0.574126	3.91954	8.87188e-05	0.000979008	TIS UP
Ifitm3	581.368	2.24944	0.617691	3.64169	0.000270857	0.00247289	TIS UP
Cd74	106072	2.24465	0.335078	6.69889	2.10006e-11	2.02919e-09	TIS UP
Cyp4f18	3952.71	2.2429	0.308478	7.27084	3.57255e-13	5.46108e-11	TIS UP
Fam114a1	63.9036	2.24237	0.47866	4.68469	2.8039e-06	5.48339e-05	TIS UP
Sema4c	19.7918	2.24189	0.680211	3.29587	0.000981175	0.00714838	TIS UP
Pkd2	35.5728	2.23822	0.645281	3.46859	0.00052319	0.00426278	TIS UP
Tgfb1i1	64.703	2.23664	0.410337	5.45075	5.01589e-08	1.80507e-06	TIS UP
Muc1	42.9335	2.23458	0.520106	4.2964	1.73597e-05	0.000253504	TIS UP
Gm18342	358.449	2.23253	0.576926	3.8697	0.000108971	0.00115501	TIS UP
Cp	52.2492	2.23036	0.811456	2.7486	0.00598512	0.0309414	TIS UP
Ptk7	116.147	2.23016	0.354468	6.29158	3.14246e-10	2.21863e-08	TIS UP
Spry4	14.2222	2.22916	0.809741	2.75293	0.00590647	0.0306489	TIS UP
Cyp27a1	124.328	2.229	0.615259	3.62287	0.000291353	0.00262975	TIS UP
Col12a1	43.321	2.22505	0.588396	3.78155	0.000155857	0.00156912	TIS UP
Ptpn13	23.4604	2.22146	0.807633	2.75058	0.00594899	0.0308407	TIS UP
Tlcd2	22.0994	2.22104	0.590194	3.76324	0.000167729	0.00166055	TIS UP
S100a11	2298.66	2.21672	0.212952	10.4095	2.24435e-25	4.15504e-22	TIS UP
Vangl1	74.7991	2.21553	0.777026	2.85129	0.0043542	0.0240949	TIS UP
Car13	146.154	2.21313	0.583882	3.79037	0.000150424	0.00152548	TIS UP
Ptms	1219.41	2.2117	0.395132	5.59738	2.17612e-08	8.86518e-07	TIS UP
Mpdz	40.0532	2.21055	0.774981	2.8524	0.00433911	0.0240273	TIS UP
Tex14	25.9342	2.20324	0.829969	2.65461	0.00794012	0.0383362	TIS UP
Bmyc	333.985	2.20316	0.486807	4.52573	6.01862e-06	0.000105783	TIS UP
Cacna1i	432.482	2.2026	0.415579	5.30007	1.15756e-07	3.62541e-06	TIS UP
Il6st	4807.83	2.19856	0.463572	4.74264	2.10947e-06	4.33926e-05	TIS UP
Ak1	399.927	2.19754	0.442577	4.96534	6.85821e-07	1.67554e-05	TIS UP
B4galt2	80.1674	2.19423	0.722164	3.03841	0.00237831	0.0148084	TIS UP
Hhipl2	26.145	2.19331	0.845984	2.59261	0.00952511	0.0441467	TIS UP
Neurl3	1992.87	2.18836	0.456934	4.78922	1.67431e-06	3.59501e-05	TIS UP
Hck	272.118	2.18829	0.515143	4.24793	2.15758e-05	0.000303372	TIS UP
Matn2	40.8842	2.18676	0.549248	3.98137	6.85203e-05	0.000791738	TIS UP
Rhou	54.8138	2.18331	0.500217	4.36472	1.27285e-05	0.000195467	TIS UP
Akap3	16.6078	2.1812	0.846905	2.57549	0.0100098	0.0460204	TIS UP
Fam20c	23.2347	2.17626	0.783029	2.77929	0.0054478	0.0287069	TIS UP
Armcx3	49.8919	2.17264	0.590206	3.68116	0.000232178	0.00216726	TIS UP
Kif21a	95.2245	2.1724	0.662296	3.2801	0.0010377	0.00748384	TIS UP
Itgal	389.972	2.17189	0.723522	3.00184	0.00268356	0.0163248	TIS UP
Sh3pxd2b	114.407	2.15637	0.358571	6.01379	1.81231e-09	1.0271e-07	TIS UP
Nfib	129.461	2.15341	0.644712	3.34012	0.000837422	0.00627643	TIS UP
Soat1	601.362	2.15195	0.367639	5.85343	4.81526e-09	2.38785e-07	TIS UP
Zfp532	33.845	2.14468	0.742723	2.88759	0.00388207	0.0219562	TIS UP
Gatsl2	339.701	2.14345	0.391246	5.47852	4.28907e-08	1.57411e-06	TIS UP
Nxpe4	46.0536	2.14254	0.549662	3.89792	9.70234e-05	0.00104567	TIS UP
Sphk1	26.7828	2.13889	0.672635	3.17986	0.00147346	0.0100371	TIS UP
Nbea	517.411	2.13462	0.616706	3.46132	0.000537535	0.00436047	TIS UP
Rnase6	301.39	2.1339	0.455708	4.6826	2.83263e-06	5.52661e-05	TIS UP
Mmp13	39.5577	2.13114	0.626405	3.40217	0.000668519	0.00524409	TIS UP
Ceacam2	82.6784	2.12689	0.68467	3.10644	0.00189353	0.0122906	TIS UP
Fhdc1	47.6006	2.1254	0.540052	3.93555	8.30058e-05	0.000929464	TIS UP
Vgf	9.53452	2.12445	0.821289	2.58672	0.00968929	0.0447831	TIS UP
Srxn1	146.462	2.12136	0.49256	4.30681	1.65624e-05	0.000243998	TIS UP
Zfp248	58.9626	2.1208	0.669654	3.16701	0.00154016	0.0103938	TIS UP
Ccdc109b	63.6388	2.11493	0.510813	4.14032	3.46816e-05	0.000449351	TIS UP
Kynu	228.998	2.11461	0.625998	3.37799	0.000730174	0.00561429	TIS UP
Itga3	154.425	2.11068	0.448171	4.70955	2.48268e-06	4.97254e-05	TIS UP
Mvb12b	398.169	2.11045	0.381306	5.53478	3.11613e-08	1.2154e-06	TIS UP
Lcp2	192.234	2.11	0.58925	3.58083	0.000342503	0.00300042	TIS UP
Snai2	9.09162	2.10883	0.780979	2.70025	0.00692882	0.0347286	TIS UP
Slc7a2	18.668	2.1044	0.717257	2.93396	0.0033467	0.0194673	TIS UP
Fkbp14	69.6295	2.10397	0.80793	2.60415	0.00921023	0.0429502	TIS UP
Plekhg1	121.187	2.10067	0.556022	3.77803	0.000158072	0.00158073	TIS UP
Ndrg4	52.804	2.1005	0.684459	3.06885	0.00214886	0.0136397	TIS UP
Fam71e1	62.0494	2.0969	0.581174	3.60805	0.000308505	0.00274673	TIS UP
Xpnpep2	14.7449	2.09649	0.643757	3.25665	0.00112735	0.00802392	TIS UP
Ecm1	367.03	2.09423	0.346864	6.03761	1.56416e-09	9.08088e-08	TIS UP
Tmem150a	101.146	2.09145	0.38194	5.47585	4.35409e-08	1.59446e-06	TIS UP
Pld4	8104.36	2.09116	0.292162	7.15754	8.21386e-13	1.14049e-10	TIS UP
Lmna	1261.56	2.07956	0.311511	6.67572	2.46029e-11	2.34248e-09	TIS UP
Ttc39c	48.4269	2.07897	0.55118	3.77185	0.000162042	0.00160999	TIS UP
Efna1	151.918	2.07683	0.446762	4.64862	3.34169e-06	6.37061e-05	TIS UP
Pinlyp	761.587	2.07661	0.251063	8.27128	1.32531e-16	4.60047e-14	TIS UP
Btn1a1	36.5888	2.07523	0.563397	3.68342	0.000230123	0.00215048	TIS UP
Nrn1	45.6494	2.0748	0.512016	4.05221	5.07366e-05	0.000618414	TIS UP
Rab4a	26.04	2.07012	0.768625	2.69328	0.00707528	0.0353276	TIS UP
Bcar1	258.931	2.069	0.364258	5.68004	1.34664e-08	5.87376e-07	TIS UP
Camkk1	188.509	2.06537	0.466968	4.42294	9.73681e-06	0.000156749	TIS UP
Pcdh19	27.9537	2.0639	0.592956	3.4807	0.000500115	0.00411909	TIS UP
Tmem151a	22.3001	2.06273	0.708912	2.90971	0.00361764	0.0207423	TIS UP
Stab1	25.8227	2.06037	0.728847	2.8269	0.00470016	0.0255428	TIS UP
Cpq	80.8975	2.05693	0.536241	3.83584	0.000125138	0.0012991	TIS UP
AI464131	26.04	2.05265	0.731973	2.80427	0.00504313	0.0269785	TIS UP
Zfp229	132.224	2.05126	0.58634	3.49842	0.000468028	0.0039148	TIS UP
C1rl	31.3189	2.04585	0.580302	3.52549	0.000422702	0.00358061	TIS UP
Pim2	5256.47	2.04434	0.524809	3.89539	9.8041e-05	0.0010537	TIS UP
Zfp651	46.0143	2.04074	0.42179	4.83827	1.30972e-06	2.94899e-05	TIS UP
Fermt2	35.2899	2.03966	0.73189	2.78684	0.00532254	0.0281985	TIS UP
Ackr3	22.667	2.03532	0.685711	2.96819	0.00299555	0.0178027	TIS UP
Col4a1	305.043	2.03529	0.427106	4.76529	1.88583e-06	3.96239e-05	TIS UP
Tbc1d9	116.684	2.03489	0.671491	3.0304	0.00244226	0.0151331	TIS UP
Irak2	533.333	2.02947	0.388284	5.22677	1.72495e-07	5.07795e-06	TIS UP
Pcdhb22	58.0352	2.0294	0.583407	3.47854	0.000504148	0.00414411	TIS UP
Rnf43	20.1527	2.02816	0.797688	2.54255	0.0110048	0.0496379	TIS UP
Igf2bp2	147.302	2.02796	0.399221	5.07979	3.77848e-07	9.9608e-06	TIS UP
Dlec1	87.9079	2.0276	0.377059	5.37741	7.55655e-08	2.54358e-06	TIS UP
Lhfp	77.876	2.02459	0.655377	3.0892	0.00200698	0.0128914	TIS UP
Igf2	31.3722	2.0221	0.679265	2.97689	0.0029119	0.0174337	TIS UP
Gas2l1	306.657	2.02062	0.418767	4.82517	1.39885e-06	3.10355e-05	TIS UP
Cdsn	123.806	2.01439	0.659566	3.05411	0.00225727	0.0141981	TIS UP
Ssc5d	92.3325	2.01401	0.406617	4.9531	7.30409e-07	1.77406e-05	TIS UP
Trem2	54.0566	2.01371	0.62196	3.23768	0.00120507	0.00848645	TIS UP
Slc11a1	19.3164	2.01309	0.672396	2.99391	0.00275427	0.0166939	TIS UP
Susd2	21.5956	2.00936	0.642485	3.12748	0.00176309	0.0115976	TIS UP
Tnnt2	103.92	2.00916	0.658152	3.05273	0.00226772	0.0142477	TIS UP
Mgmt	192.273	2.00578	0.404728	4.95587	7.2007e-07	1.7515e-05	TIS UP
Lppr2	37.5426	2.00571	0.503088	3.98679	6.6973e-05	0.000776135	TIS UP
Eno2	72.5029	2.00293	0.562999	3.55761	0.000374248	0.00321761	TIS UP
Ust	23.5008	2.00091	0.745067	2.68554	0.0072413	0.0358771	TIS UP
Tdrkh	38.3898	1.99726	0.750849	2.66	0.0078141	0.0379477	TIS UP
Phldb1	228.748	1.99611	0.491765	4.05906	4.92697e-05	0.000604515	TIS UP
Cd300a	650.991	1.99539	0.297288	6.71199	1.91982e-11	1.88165e-09	TIS UP
Plau	83.0699	1.99307	0.49626	4.01618	5.91499e-05	0.000701963	TIS UP
Rps6kc1	313.83	1.99114	0.476732	4.17665	2.95836e-05	0.000392454	TIS UP
Asap2	14.532	1.98947	0.743879	2.67445	0.00748524	0.0367542	TIS UP
H2-Eb1	19160.2	1.98857	0.410999	4.83839	1.30895e-06	2.94899e-05	TIS UP
Fam83h	108.73	1.98738	0.448539	4.43079	9.38901e-06	0.000151883	TIS UP
Lpp	202.856	1.98731	0.344716	5.76507	8.16217e-09	3.77772e-07	TIS UP
Cd248	322.439	1.98649	0.349919	5.67699	1.37088e-08	5.94835e-07	TIS UP
Aph1c	50.6477	1.98602	0.570656	3.48025	0.000500955	0.00412397	TIS UP
Cox6b2	238.979	1.98431	0.40919	4.84937	1.23855e-06	2.8039e-05	TIS UP
Slc6a8	181.464	1.98373	0.376785	5.26489	1.40274e-07	4.32023e-06	TIS UP
Itgb7	1539.68	1.98247	0.509397	3.8918	9.95017e-05	0.001067	TIS UP
Cxx1b	106.688	1.97941	0.502743	3.93722	8.24316e-05	0.000924899	TIS UP
Pam	148.894	1.97924	0.607039	3.26049	0.00111219	0.00793296	TIS UP
Csf2rb	2459.31	1.9789	0.273957	7.22341	5.06982e-13	7.21994e-11	TIS UP
A430105I19Rik	549.744	1.97454	0.522317	3.78034	0.000156611	0.00157102	TIS UP
B4galnt2	14.6565	1.97015	0.774269	2.54453	0.0109424	0.0494499	TIS UP
Npr2	656.258	1.96958	0.536049	3.67426	0.000238538	0.00221545	TIS UP
Cnn2	526.539	1.9685	0.360306	5.46341	4.67066e-08	1.69548e-06	TIS UP
Cers6	164.462	1.96499	0.647118	3.03653	0.00239318	0.014866	TIS UP
Phlda1	131.623	1.96245	0.473604	4.14365	3.41821e-05	0.000443568	TIS UP
Hist2h2aa2	952.493	1.95733	0.306269	6.39089	1.64925e-10	1.26635e-08	TIS UP
Srgap3	24.4494	1.95356	0.762533	2.56194	0.010409	0.0475815	TIS UP
Phactr1	287.987	1.95325	0.335589	5.82034	5.87267e-09	2.80623e-07	TIS UP
Cdc42ep2	46.942	1.95266	0.447019	4.36818	1.25288e-05	0.000192756	TIS UP
Cd83	378.628	1.95264	0.516191	3.78279	0.000155083	0.00156416	TIS UP
Dok7	22.8335	1.94982	0.709086	2.74976	0.00596394	0.030897	TIS UP
Zfyve28	103.813	1.94621	0.641965	3.03165	0.00243222	0.0150877	TIS UP
Large	52.4532	1.94314	0.400467	4.85219	1.22105e-06	2.7756e-05	TIS UP
Pira2	67.6267	1.9426	0.624258	3.11185	0.00185917	0.0121116	TIS UP
Cdkn1a	7622	1.93725	0.394715	4.90798	9.2019e-07	2.18097e-05	TIS UP
Scimp	223.832	1.93359	0.317959	6.08127	1.19234e-09	7.17211e-08	TIS UP
Cspg4	99.8902	1.93274	0.427759	4.5183	6.23391e-06	0.000108764	TIS UP
Smpdl3a	104.994	1.92789	0.483573	3.98675	6.69837e-05	0.000776135	TIS UP
Vdr	127.719	1.92356	0.561249	3.42729	0.000609639	0.00487185	TIS UP
Pirb	142.759	1.91699	0.623547	3.07434	0.00210971	0.0134324	TIS UP
Tbx15	322.823	1.91509	0.457946	4.18192	2.89054e-05	0.000385298	TIS UP
Sh2b2	688.535	1.91319	0.424175	4.51038	6.4712e-06	0.000112082	TIS UP
Adora2a	150	1.90936	0.543932	3.51029	0.000447613	0.00376483	TIS UP
Ctsf	35.4362	1.90869	0.660116	2.89145	0.00383472	0.0217253	TIS UP
Rasgrp3	236.997	1.90353	0.335182	5.6791	1.35406e-08	5.89071e-07	TIS UP
Myo1d	309.738	1.89741	0.245866	7.71726	1.18859e-14	2.64057e-12	TIS UP
AI607873	133.53	1.89592	0.596329	3.17932	0.00147622	0.0100518	TIS UP
Sall2	45.6924	1.89544	0.434507	4.36227	1.28718e-05	0.000196941	TIS UP
Scarf2	102.027	1.89456	0.395954	4.78482	1.71144e-06	3.65591e-05	TIS UP
Tctn2	20.5573	1.89181	0.677381	2.79283	0.00522493	0.0277785	TIS UP
Id2	569.689	1.88916	0.260871	7.24173	4.43e-13	6.53209e-11	TIS UP
Hspb1	467.463	1.88639	0.397619	4.74421	2.09319e-06	4.31642e-05	TIS UP
Sec14l2	61.1215	1.88541	0.696431	2.70724	0.00678455	0.0341729	TIS UP
Csf1	1523.85	1.88444	0.284412	6.62573	3.4553e-11	3.18079e-09	TIS UP
Acot1	190.178	1.88079	0.71076	2.64617	0.00814083	0.0391367	TIS UP
Smoc1	1701.68	1.88001	0.34102	5.51289	3.52979e-08	1.35828e-06	TIS UP
Dnm1	120.222	1.87866	0.409724	4.58519	4.53571e-06	8.28662e-05	TIS UP
Hdgfrp3	49.121	1.87826	0.424055	4.42928	9.45503e-06	0.000152803	TIS UP
Lmo7	508.842	1.87633	0.66445	2.82389	0.00474445	0.0256657	TIS UP
Ankrd33b	302.146	1.87043	0.449244	4.16352	3.13384e-05	0.000411474	TIS UP
H2-Aa	15192.5	1.87003	0.351734	5.31661	1.05721e-07	3.33621e-06	TIS UP
Serpine2	683.081	1.86841	0.393112	4.75286	2.00559e-06	4.17715e-05	TIS UP
Acvrl1	83.4212	1.86211	0.650924	2.86072	0.0042268	0.0235621	TIS UP
Hmces	1763.16	1.86131	0.346999	5.36403	8.13873e-08	2.70134e-06	TIS UP
Gm7281	32.4618	1.8589	0.628186	2.95916	0.00308478	0.0182329	TIS UP
Tmem53	32.4115	1.8541	0.693623	2.67306	0.00751622	0.0368447	TIS UP
Mgst2	86.6732	1.85029	0.481809	3.84029	0.000122891	0.00127736	TIS UP
Dzip1l	20.2482	1.84341	0.721698	2.55427	0.0106412	0.0483908	TIS UP
Tbc1d2b	61.5446	1.84057	0.625214	2.94391	0.00324097	0.018981	TIS UP
Lyplal1	47.9633	1.83716	0.550047	3.34001	0.000837761	0.00627643	TIS UP
Arhgef17	129.315	1.83392	0.489723	3.7448	0.000180538	0.00176361	TIS UP
Pgam2	160.488	1.83023	0.601083	3.04489	0.00232762	0.0145462	TIS UP
Cpt1c	43.1496	1.82984	0.654499	2.79578	0.00517747	0.0275789	TIS UP
Ckb	4919.41	1.82851	0.541228	3.37845	0.000728949	0.00561264	TIS UP
Echdc3	25.6848	1.82637	0.536156	3.40642	0.000658213	0.00518051	TIS UP
Cybb	4153.2	1.82577	0.251776	7.25158	4.11931e-13	6.18635e-11	TIS UP
Rnf122	291.452	1.82516	0.335074	5.44703	5.12187e-08	1.83528e-06	TIS UP
Fads3	88.611	1.82448	0.580187	3.14465	0.00166288	0.0110802	TIS UP
Tmem163	571.917	1.8204	0.518666	3.50978	0.000448481	0.00377022	TIS UP
Ccl6	217.236	1.81865	0.534523	3.40238	0.000668023	0.00524286	TIS UP
Tmem38a	193.307	1.81667	0.345467	5.25859	1.45162e-07	4.42984e-06	TIS UP
Styxl1	19.1353	1.81092	0.684967	2.6438	0.008198	0.0393646	TIS UP
Mllt4	1364.73	1.80947	0.533351	3.39264	0.000692235	0.00538973	TIS UP
Serpine1	285.878	1.80426	0.500326	3.60617	0.000310754	0.00276148	TIS UP
Cd86	798.526	1.80397	0.531929	3.39138	0.000695415	0.00540944	TIS UP
Usp35	60.3426	1.80164	0.478539	3.76487	0.000166636	0.0016507	TIS UP
Dlg3	89.5433	1.80078	0.498798	3.61024	0.00030591	0.00273155	TIS UP
Mtmr11	42.9598	1.80027	0.657955	2.73616	0.00621603	0.0318681	TIS UP
A530032D15Rik	1100.62	1.79831	0.511672	3.51457	0.000440462	0.00371594	TIS UP
Frs3	84.658	1.79771	0.527482	3.4081	0.000654163	0.00515107	TIS UP
Cd274	1463.26	1.79627	0.241581	7.43547	1.04199e-13	1.78986e-11	TIS UP
Sh3bgrl2	2391.39	1.79552	0.398138	4.5098	6.48897e-06	0.000112273	TIS UP
Gm13841	148.61	1.79511	0.359926	4.98743	6.11867e-07	1.52391e-05	TIS UP
Atp11a	362.26	1.79229	0.47395	3.78159	0.000155828	0.00156912	TIS UP
Six4	22.752	1.77739	0.591354	3.00562	0.00265037	0.0161642	TIS UP
Selm	69.2518	1.77738	0.478439	3.71496	0.000203232	0.00194126	TIS UP
Camk2n1	66.3166	1.77579	0.573452	3.09667	0.00195707	0.0126342	TIS UP
Sidt2	10640.4	1.77306	0.354227	5.00545	5.57312e-07	1.41124e-05	TIS UP
Arhgef25	40.9055	1.76962	0.529267	3.34353	0.0008272	0.00620979	TIS UP
Dyrk4	64.6457	1.76674	0.581844	3.03645	0.0023938	0.014866	TIS UP
Osbpl10	17.1722	1.76477	0.641996	2.74888	0.00597994	0.0309242	TIS UP
Stx3	208.004	1.76075	0.504196	3.49219	0.000479071	0.00398317	TIS UP
Azin2	92.346	1.75721	0.341322	5.14825	2.62932e-07	7.30162e-06	TIS UP
Snai1	90.1375	1.75562	0.344975	5.08914	3.59695e-07	9.51309e-06	TIS UP
Synpo	39.5133	1.75523	0.563152	3.1168	0.00182823	0.0119435	TIS UP
Anxa1	465.341	1.75432	0.468272	3.74638	0.000179407	0.00175531	TIS UP
Vamp5	45.0476	1.75376	0.536053	3.27161	0.00106937	0.0076735	TIS UP
Tnfrsf1a	130.933	1.75111	0.36411	4.80928	1.51475e-06	3.30784e-05	TIS UP
Neo1	279.684	1.74744	0.304187	5.74463	9.21241e-09	4.20857e-07	TIS UP
Gstm5	115.926	1.74453	0.509486	3.4241	0.000616838	0.00491759	TIS UP
Crabp2	21.6961	1.74451	0.664721	2.62442	0.00867971	0.0410157	TIS UP
Plaur	429.545	1.74236	0.376224	4.63117	3.63609e-06	6.84571e-05	TIS UP
Gm15433	56.1126	1.73658	0.474904	3.65669	0.000255494	0.00234936	TIS UP
Tpst2	1506.01	1.73654	0.280075	6.20027	5.63679e-10	3.7871e-08	TIS UP
Tes	262.794	1.73502	0.435835	3.98091	6.86528e-05	0.000792719	TIS UP
Gm6264	437.261	1.73336	0.406645	4.26259	2.02072e-05	0.00028728	TIS UP
Piwil2	77.0557	1.7294	0.533699	3.2404	0.00119362	0.00842716	TIS UP
Prss36	291.278	1.7273	0.606676	2.84715	0.00441125	0.0243039	TIS UP
Adora1	33.0045	1.72597	0.679327	2.5407	0.0110629	0.049846	TIS UP
Dbn1	124.525	1.72499	0.381048	4.52697	5.98348e-06	0.000105276	TIS UP
Slc2a6	475.906	1.72333	0.333159	5.1727	2.30739e-07	6.52727e-06	TIS UP
BC022687	212.575	1.72273	0.285325	6.03777	1.56261e-09	9.08088e-08	TIS UP
Cul7	231.503	1.7227	0.485295	3.5498	0.000385519	0.00330598	TIS UP
B230118H07Rik	149.45	1.72214	0.508802	3.3847	0.000712552	0.00551698	TIS UP
Nkain1	88.398	1.71883	0.372872	4.60971	4.03224e-06	7.50673e-05	TIS UP
H2-Q1	21.7023	1.71617	0.648389	2.64682	0.00812533	0.0390945	TIS UP
Efnb1	162.977	1.71602	0.513173	3.34394	0.000825978	0.00620489	TIS UP
Apbb2	111.706	1.71463	0.277708	6.17423	6.64869e-10	4.31052e-08	TIS UP
Kcnh2	30.4082	1.71426	0.620434	2.763	0.00572728	0.0299805	TIS UP
Nfam1	240.715	1.71422	0.317491	5.39927	6.69113e-08	2.29504e-06	TIS UP
Cped1	34.3649	1.71358	0.605598	2.82956	0.00466117	0.0253805	TIS UP
Antxr1	306.946	1.71324	0.483178	3.54577	0.000391469	0.0033501	TIS UP
Src	164.071	1.71246	0.619704	2.76335	0.00572116	0.0299579	TIS UP
Pim1	4639.64	1.71198	0.50607	3.38289	0.000717269	0.0055432	TIS UP
Hist1h4h	167.211	1.70956	0.281987	6.06255	1.33977e-09	7.94423e-08	TIS UP
Rrad	434.607	1.70764	0.417002	4.09505	4.22084e-05	0.000532785	TIS UP
St3gal2	242.519	1.70574	0.416866	4.09181	4.28021e-05	0.000538241	TIS UP
Ighg2b	4262.6	1.70294	0.357756	4.76006	1.93534e-06	4.046e-05	TIS UP
Itm2c	1941.44	1.70275	0.219692	7.75063	9.14371e-15	2.11601e-12	TIS UP
Tmem140	150.365	1.69742	0.351035	4.83546	1.32838e-06	2.97893e-05	TIS UP
Bcar3	1959.46	1.69215	0.450812	3.75357	0.000174337	0.00171375	TIS UP
Zmat3	7973.01	1.68927	0.206212	8.1919	2.57137e-16	7.93411e-14	TIS UP
B4galt6	64.5357	1.68899	0.485579	3.4783	0.000504602	0.0041458	TIS UP
Myof	1598.88	1.68756	0.3138	5.37781	7.53964e-08	2.54302e-06	TIS UP
Il6ra	2556.52	1.68542	0.288078	5.85057	4.89888e-09	2.42211e-07	TIS UP
Zfr2	116.813	1.68485	0.497729	3.38507	0.0007116	0.00551217	TIS UP
Tlr1	562.065	1.68451	0.199911	8.42628	3.5683e-17	1.4156e-14	TIS UP
Map1lc3a	342.72	1.68443	0.355362	4.74003	2.13683e-06	4.38748e-05	TIS UP
H2-Oa	952.879	1.68393	0.2141	7.86515	3.68653e-15	9.44998e-13	TIS UP
AI854703	164.986	1.68282	0.622291	2.70422	0.0068464	0.0344013	TIS UP
Cdk18	395.055	1.67818	0.581931	2.88381	0.00392901	0.02214	TIS UP
Iglv3	236.172	1.67734	0.2544	6.59334	4.30039e-11	3.87314e-09	TIS UP
Slc25a13	113.43	1.6756	0.643404	2.60428	0.00920667	0.0429502	TIS UP
Rap1gap	57.49	1.67236	0.504557	3.31451	0.000918028	0.00675328	TIS UP
Gabbr1	73.6257	1.67066	0.63296	2.63945	0.00830419	0.0396573	TIS UP
Hs1bp3	761.8	1.66891	0.423218	3.94338	8.03417e-05	0.000906333	TIS UP
Rab34	82.4952	1.66838	0.493107	3.3834	0.000715937	0.00553547	TIS UP
BC021785	24.9646	1.66836	0.60272	2.76806	0.00563915	0.0295749	TIS UP
Prnp	328.459	1.66674	0.563426	2.95823	0.00309413	0.0182623	TIS UP
Zfp941	22.0762	1.66476	0.64989	2.5616	0.0104193	0.0476154	TIS UP
Mapre3	103.535	1.66197	0.306858	5.41609	6.09174e-08	2.11901e-06	TIS UP
Hmcn2	819.741	1.66046	0.311004	5.33903	9.34466e-08	3.0292e-06	TIS UP
Slfn2	1201.5	1.65946	0.391612	4.23751	2.26012e-05	0.000314604	TIS UP
Tcn2	874.922	1.65023	0.390733	4.22341	2.4063e-05	0.000331821	TIS UP
Rnd3	241.882	1.64726	0.588849	2.79742	0.00515121	0.0274537	TIS UP
Cand2	52.8825	1.64582	0.578377	2.84558	0.0044331	0.0243777	TIS UP
Slc43a2	2728.86	1.64546	0.187844	8.75969	1.95783e-18	1.0523e-15	TIS UP
Mpeg1	1573.57	1.63798	0.58768	2.7872	0.00531665	0.0281762	TIS UP
Slc37a2	610.718	1.6374	0.217783	7.51848	5.54153e-14	1.03069e-11	TIS UP
Fut10	52.3531	1.63709	0.628006	2.60681	0.00913894	0.0426894	TIS UP
Pgpep1	2405.71	1.63312	0.341264	4.7855	1.70558e-06	3.65275e-05	TIS UP
Ms4a4b	194.599	1.63259	0.408896	3.99268	6.5331e-05	0.000761287	TIS UP
Copz2	32.8123	1.63217	0.52024	3.13734	0.00170487	0.0112769	TIS UP
Thy1	144.196	1.6283	0.451275	3.60823	0.000308293	0.00274673	TIS UP
Capn2	656.353	1.62606	0.509821	3.18947	0.00142534	0.00978132	TIS UP
Megf8	520.688	1.62537	0.283688	5.72945	1.00759e-08	4.54973e-07	TIS UP
Kdm5b	1457.63	1.62397	0.411232	3.94903	7.84695e-05	0.000888219	TIS UP
Jun	4922.56	1.62333	0.189686	8.55798	1.14862e-17	4.90725e-15	TIS UP
Itpripl2	314.988	1.61886	0.463603	3.4919	0.000479595	0.00398554	TIS UP
Iglv1	10220	1.61785	0.352289	4.59239	4.38197e-06	8.04101e-05	TIS UP
Ncf1	909.558	1.61477	0.430428	3.75154	0.00017575	0.00172357	TIS UP
F11r	159.613	1.60858	0.513115	3.13493	0.00171898	0.0113567	TIS UP
H2-Q7	4326.48	1.60799	0.302447	5.31661	1.05716e-07	3.33621e-06	TIS UP
Raet1d	62.3148	1.60065	0.369313	4.33412	1.46345e-05	0.000220471	TIS UP
Atp6v0a1	1554.83	1.59909	0.314812	5.07951	3.78417e-07	9.9608e-06	TIS UP
Lrrc24	84.3842	1.59823	0.501281	3.18829	0.00143118	0.0098042	TIS UP
Spred3	69.4702	1.59695	0.488033	3.27221	0.00106711	0.00766389	TIS UP
Mtss1l	108.1	1.59538	0.526883	3.02796	0.00246209	0.0152503	TIS UP
Ift43	289.507	1.59487	0.212822	7.49393	6.68408e-14	1.21054e-11	TIS UP
Gnb5	99.1029	1.59335	0.476	3.34737	0.000815812	0.00614191	TIS UP
Cd68	459.144	1.5927	0.393426	4.04829	5.15924e-05	0.000625618	TIS UP
Il10ra	1483.3	1.59167	0.45059	3.53241	0.000411785	0.00350238	TIS UP
Gxylt2	33.2627	1.5871	0.497637	3.18927	0.00142635	0.00978252	TIS UP
Gas7	1717.6	1.58591	0.340916	4.65191	3.28868e-06	6.28394e-05	TIS UP
Qsox1	304.849	1.58439	0.264302	5.99461	2.03977e-09	1.15209e-07	TIS UP
Serpina3f	121.752	1.58437	0.58919	2.68907	0.0071652	0.0356247	TIS UP
Ighv2-5	127.409	1.58417	0.598221	2.64814	0.00809361	0.0389644	TIS UP
Lrrc25	100.555	1.58306	0.496323	3.18958	0.0014248	0.00978132	TIS UP
H2-Q5	2919.98	1.58204	0.593552	2.66538	0.00769008	0.0374327	TIS UP
Trim46	362.874	1.58161	0.279614	5.65641	1.54576e-08	6.60396e-07	TIS UP
Tyrobp	712.058	1.58134	0.239007	6.6163	3.68309e-11	3.37185e-09	TIS UP
Vmac	1070.53	1.58019	0.306512	5.1554	2.53089e-07	7.09927e-06	TIS UP
Ppap2b	166.105	1.57711	0.492799	3.20032	0.00137277	0.00948306	TIS UP
Gng12	470.122	1.5722	0.527156	2.98242	0.00285977	0.0171958	TIS UP
Cd14	100.523	1.57205	0.536669	2.92927	0.00339763	0.0196989	TIS UP
Plekha4	45.5638	1.56967	0.504442	3.1117	0.00186015	0.0121117	TIS UP
Samsn1	224.469	1.56939	0.393016	3.99318	6.51925e-05	0.00076067	TIS UP
Kdelr3	62.2189	1.56887	0.480719	3.26359	0.00110012	0.00785354	TIS UP
Clstn1	5559.31	1.56619	0.270589	5.78808	7.11943e-09	3.3228e-07	TIS UP
Cdc42bpb	2036.64	1.56488	0.395446	3.95726	7.58131e-05	0.000862251	TIS UP
Il13ra1	38.362	1.56463	0.463152	3.37823	0.000729548	0.00561397	TIS UP
Papss2	326.757	1.56459	0.290112	5.39305	6.92712e-08	2.35844e-06	TIS UP
Csf1r	584.388	1.5644	0.55506	2.81844	0.00482579	0.0260555	TIS UP
Fgd1	77.6762	1.5634	0.519316	3.0105	0.00260816	0.015971	TIS UP
Fam214b	356.878	1.56241	0.259438	6.02229	1.71971e-09	9.84667e-08	TIS UP
Nradd	112.813	1.56191	0.362144	4.31293	1.61102e-05	0.000239455	TIS UP
Ly6d	1858.58	1.56154	0.3521	4.43492	9.21077e-06	0.000149727	TIS UP
Fnip2	370.833	1.55882	0.38122	4.08903	4.3318e-05	0.0005433	TIS UP
Eps8l1	353.713	1.55841	0.613088	2.5419	0.0110253	0.0497031	TIS UP
9030617O03Rik	3503.3	1.55259	0.244188	6.3582	2.04131e-10	1.51906e-08	TIS UP
Lgmn	33212.6	1.55255	0.220638	7.03665	1.96915e-12	2.4856e-10	TIS UP
Pcna-ps2	61.3432	1.54971	0.580073	2.67157	0.00754965	0.0369542	TIS UP
Renbp	619.009	1.54606	0.454644	3.40061	0.000672368	0.00526457	TIS UP
Ypel3	3943.84	1.54575	0.395075	3.91255	9.13275e-05	0.00100182	TIS UP
Tlr3	29.4214	1.5405	0.579064	2.66033	0.00780652	0.037933	TIS UP
Lacc1	585.109	1.53469	0.276054	5.55938	2.70734e-08	1.07918e-06	TIS UP
Ddit4l	84.6142	1.53424	0.407395	3.76598	0.000165899	0.00164439	TIS UP
Flot2	197.272	1.53135	0.360769	4.24468	2.18903e-05	0.000307017	TIS UP
Gh	206.528	1.53006	0.563692	2.71435	0.00664057	0.0335187	TIS UP
Thsd1	80.3094	1.52883	0.563913	2.7111	0.00670598	0.0337976	TIS UP
Nsun3	1009.76	1.52691	0.312827	4.881	1.05549e-06	2.44258e-05	TIS UP
Vsig10l	40.1376	1.52513	0.553939	2.75324	0.00590088	0.0306294	TIS UP
Gm7592	57.2377	1.5236	0.581406	2.62055	0.00877891	0.0413321	TIS UP
Slc26a11	394.08	1.52202	0.3118	4.88139	1.05341e-06	2.44115e-05	TIS UP
Ces2f	30.5842	1.51822	0.472274	3.2147	0.0013058	0.0090905	TIS UP
Dgat2	182.649	1.51729	0.461876	3.28507	0.00101957	0.0073797	TIS UP
Zfp53	1150.63	1.51678	0.212146	7.14971	8.69604e-13	1.19747e-10	TIS UP
Fam171b	57.5764	1.51606	0.464084	3.26678	0.00108778	0.0077855	TIS UP
Eif2ak3	4218.05	1.50794	0.317518	4.74914	2.04283e-06	4.24016e-05	TIS UP
Frmd4a	170.664	1.50767	0.571089	2.63998	0.00829101	0.0396171	TIS UP
Slpi	1861.87	1.50675	0.296178	5.08732	3.63158e-07	9.58946e-06	TIS UP
Itfg3	949.972	1.50601	0.275916	5.45822	4.80932e-08	1.73448e-06	TIS UP
Ext1	245.81	1.5057	0.403165	3.7347	0.000187939	0.0018272	TIS UP
Sgsh	1141.65	1.50104	0.357995	4.19291	2.75395e-05	0.000370948	TIS UP
Fjx1	30.3411	1.50077	0.549988	2.72873	0.00635794	0.0323864	TIS UP
Laptm5	28250.7	1.49385	0.271595	5.50031	3.79131e-08	1.43244e-06	TIS UP
Sqstm1	11405.6	1.49326	0.187474	7.96515	1.65029e-15	4.58285e-13	TIS UP
Six1	30.051	1.49321	0.526905	2.83392	0.00459807	0.0251273	TIS UP
H2-Q6	4956.17	1.48992	0.253773	5.87109	4.32943e-09	2.19261e-07	TIS UP
Hey1	81.1676	1.48352	0.525772	2.82161	0.00477834	0.0258244	TIS UP
Gm10222	4112.82	1.48251	0.436826	3.39382	0.000689258	0.0053766	TIS UP
Mxra8	344.939	1.47577	0.443123	3.33038	0.000867266	0.0064526	TIS UP
Glipr2	1627.58	1.47543	0.221644	6.65675	2.79956e-11	2.65036e-09	TIS UP
Fam135a	98.463	1.47429	0.554997	2.6564	0.00789808	0.0381706	TIS UP
Kcnn1	121.337	1.47364	0.436836	3.37344	0.000742342	0.00569209	TIS UP
Gstt3	1109.36	1.46824	0.350386	4.19035	2.78522e-05	0.000373952	TIS UP
Map3k9	233.225	1.46739	0.460131	3.18906	0.00142737	0.00978313	TIS UP
Slc46a1	177.057	1.4672	0.439634	3.33732	0.000845919	0.00632333	TIS UP
Sept5	101.397	1.46649	0.441575	3.32104	0.000896835	0.00663252	TIS UP
Antxr2	488.646	1.46591	0.304881	4.80813	1.52347e-06	3.31384e-05	TIS UP
Usp17la	37.2092	1.46589	0.474884	3.08685	0.00202291	0.0129488	TIS UP
Olfml3	39.5884	1.46395	0.465891	3.14225	0.00167653	0.0111381	TIS UP
Rhof	875.197	1.46368	0.303824	4.81751	1.45363e-06	3.1953e-05	TIS UP
Ccdc122	49.6263	1.46317	0.484844	3.01781	0.00254611	0.0156602	TIS UP
Tnfrsf12a	317.409	1.46184	0.318425	4.59084	4.41463e-06	8.09204e-05	TIS UP
Gsn	1881.78	1.45995	0.532271	2.74288	0.00609033	0.03136	TIS UP
Bmpr1a	428.631	1.4591	0.410641	3.55323	0.000380529	0.00326823	TIS UP
Ddx4	33.8178	1.45705	0.480395	3.03303	0.00242112	0.0150301	TIS UP
Glis3	47.7837	1.45509	0.569899	2.55324	0.0106726	0.0484675	TIS UP
Scn4a	963.295	1.45503	0.362891	4.00957	6.08305e-05	0.000716802	TIS UP
Lzts2	1268.85	1.45477	0.277079	5.25038	1.51787e-07	4.56513e-06	TIS UP
Kdelc2	95.4509	1.45298	0.407545	3.5652	0.000363576	0.00313881	TIS UP
Nlrx1	84.652	1.45073	0.540771	2.68272	0.0073027	0.0361168	TIS UP
Arid3b	585.014	1.44834	0.429403	3.37292	0.000743755	0.0057003	TIS UP
Igkv8-19	929.944	1.44738	0.509258	2.84214	0.00448115	0.0245932	TIS UP
Fbxo17	44.4571	1.4456	0.54822	2.63689	0.00836695	0.0398451	TIS UP
Zfp948	100.198	1.44489	0.520259	2.77726	0.00548199	0.0288415	TIS UP
Kif13a	510.515	1.44378	0.48289	2.98987	0.00279099	0.0168674	TIS UP
Fas	128.662	1.44118	0.522817	2.75657	0.00584117	0.0304428	TIS UP
Fam212b	849.906	1.43843	0.386183	3.72474	0.000195515	0.00188576	TIS UP
Bank1	2017.37	1.43315	0.468187	3.06106	0.00220555	0.0139464	TIS UP
Slc35e4	415.875	1.43168	0.226844	6.31128	2.76735e-10	1.97895e-08	TIS UP
H2-DMb1	1075.36	1.43158	0.399622	3.58233	0.000340542	0.00298637	TIS UP
Snta1	131.147	1.43126	0.429881	3.32944	0.000870206	0.00647005	TIS UP
Bmp1	310.498	1.42951	0.220421	6.48537	8.85163e-11	7.26531e-09	TIS UP
Nyap1	37.8589	1.42823	0.429354	3.32645	0.000879599	0.00652242	TIS UP
Fcrl1	1408.03	1.42755	0.228973	6.23458	4.52992e-10	3.10607e-08	TIS UP
Il4ra	1726.84	1.42693	0.340906	4.1857	2.84293e-05	0.000380473	TIS UP
Tsc22d1	891.833	1.42672	0.387898	3.67809	0.000234986	0.00218856	TIS UP
Fah	45.934	1.42555	0.498709	2.85849	0.00425665	0.0236651	TIS UP
AA415398	112.032	1.42554	0.461756	3.08722	0.00202037	0.0129425	TIS UP
Cnga3	26.9678	1.42546	0.532107	2.6789	0.00738653	0.0363918	TIS UP
Maged1	1007.99	1.42183	0.396474	3.58618	0.000335555	0.00295196	TIS UP
Klf4	385.818	1.41861	0.421084	3.36894	0.000754579	0.00576733	TIS UP
Adck3	3761.64	1.41795	0.327364	4.3314	1.48162e-05	0.000222804	TIS UP
Leprel2	88.1857	1.41716	0.387037	3.66157	0.000250675	0.00231527	TIS UP
Sik1	4254.66	1.4149	0.396831	3.56549	0.00036317	0.00313693	TIS UP
Chst11	880.915	1.41258	0.367095	3.848	0.000119088	0.00124404	TIS UP
Zfp612	62.1019	1.41239	0.508067	2.77993	0.00543713	0.0286688	TIS UP
C920009B18Rik	766.765	1.41183	0.480443	2.93861	0.00329689	0.0192462	TIS UP
Mlkl	98.3373	1.41163	0.369919	3.81604	0.00013561	0.00138963	TIS UP
Plch1	82.0519	1.41152	0.422429	3.34145	0.000833431	0.00624961	TIS UP
Gpr176	447.772	1.40977	0.426894	3.30239	0.000958647	0.00700262	TIS UP
Tnfaip3	928.177	1.40685	0.323139	4.3537	1.33858e-05	0.00020387	TIS UP
Dennd2a	156.064	1.40659	0.467705	3.00742	0.00263474	0.0160806	TIS UP
Tlr4	273.338	1.40411	0.341294	4.1141	3.887e-05	0.000497047	TIS UP
Gm4735	1582.7	1.40318	0.417135	3.36386	0.000768592	0.00585029	TIS UP
Dusp5	4864.38	1.40259	0.239122	5.86558	4.47555e-09	2.23939e-07	TIS UP
Spint2	884.041	1.40096	0.234386	5.97716	2.27068e-09	1.26535e-07	TIS UP
Gpr137b	428.071	1.40059	0.266392	5.25761	1.45939e-07	4.4454e-06	TIS UP
Prf1	112.211	1.4003	0.534466	2.62	0.00879295	0.0413865	TIS UP
Tecpr1	4419.21	1.39665	0.295823	4.72124	2.34406e-06	4.7399e-05	TIS UP
Arhgap5	141.397	1.39603	0.51407	2.71563	0.00661494	0.0334298	TIS UP
Alpk1	98.907	1.39513	0.538045	2.59296	0.00951527	0.0441134	TIS UP
Itgb5	894.049	1.39315	0.355178	3.92239	8.76734e-05	0.000970641	TIS UP
Sh3pxd2a	784.837	1.39282	0.31742	4.38793	1.14435e-05	0.000178365	TIS UP
Efna4	42.3164	1.39053	0.541982	2.56564	0.0102985	0.0471672	TIS UP
Fam169b	448.823	1.39031	0.438542	3.17029	0.00152285	0.0103145	TIS UP
Scamp1	438.111	1.39028	0.371218	3.74519	0.00018026	0.00176262	TIS UP
Tgfbr3	154.324	1.38842	0.449576	3.08828	0.00201321	0.0129115	TIS UP
4632428N05Rik	1234.44	1.38734	0.408586	3.39545	0.000685147	0.00534954	TIS UP
Gm10260	357.993	1.38721	0.30954	4.48151	7.4116e-06	0.000126087	TIS UP
Hexa	2252.98	1.38062	0.387774	3.56036	0.000370341	0.00318895	TIS UP
Igfbp4	439.369	1.38044	0.410944	3.35919	0.000781723	0.00592857	TIS UP
Faim3	702.634	1.3802	0.397042	3.47621	0.000508558	0.00417624	TIS UP
Extl1	97.766	1.37919	0.480468	2.8705	0.00409818	0.0229757	TIS UP
Tmem116	109.346	1.37701	0.457351	3.01083	0.00260534	0.0159596	TIS UP
Impact	1060.76	1.37151	0.31397	4.36828	1.25228e-05	0.000192756	TIS UP
Mustn1	28.2423	1.37149	0.511466	2.6815	0.0073294	0.0362059	TIS UP
Cnr2	576.37	1.37148	0.307108	4.46577	7.97803e-06	0.000133598	TIS UP
Gm29216	23064.4	1.36899	0.318556	4.29748	1.72749e-05	0.000252707	TIS UP
Grap	3012.84	1.36761	0.347534	3.93517	8.31389e-05	0.000930329	TIS UP
Rab20	305.147	1.36527	0.377446	3.61713	0.00029789	0.00267375	TIS UP
Tubb6	913.648	1.3648	0.290344	4.70063	2.59359e-06	5.15071e-05	TIS UP
Dok4	98.7289	1.36439	0.36026	3.78722	0.000152339	0.00154085	TIS UP
Shisa5	7746.34	1.36243	0.422159	3.2273	0.00124965	0.00875214	TIS UP
Cntnap1	102.066	1.3624	0.507394	2.68509	0.00725106	0.0359041	TIS UP
Klf6	2149.83	1.36231	0.29968	4.54588	5.47056e-06	9.70719e-05	TIS UP
Gpr55	52.2332	1.36221	0.528233	2.57881	0.00991418	0.0456705	TIS UP
Foxo1	4203.27	1.35849	0.261518	5.19463	2.05132e-07	5.91332e-06	TIS UP
Trip6	226.952	1.35774	0.340059	3.99266	6.53367e-05	0.000761287	TIS UP
1700102P08Rik	27.5603	1.35685	0.519313	2.61278	0.00898092	0.0421403	TIS UP
Snx20	4698.65	1.35471	0.164897	8.21551	2.1127e-16	7.02835e-14	TIS UP
Icam1	4076.67	1.3528	0.272004	4.97345	6.57731e-07	1.62117e-05	TIS UP
Slc8b1	800.322	1.35108	0.456553	2.9593	0.00308339	0.0182329	TIS UP
Ier5	5427.43	1.35011	0.181682	7.4312	1.07618e-13	1.82972e-11	TIS UP
Tmem120b	253.912	1.34942	0.389229	3.46692	0.000526465	0.00428528	TIS UP
Bbc3	4107.13	1.3475	0.23494	5.73552	9.7216e-09	4.41366e-07	TIS UP
Sh3tc1	1204.33	1.34533	0.32789	4.10301	4.07815e-05	0.000517941	TIS UP
Espnl	74.4696	1.34428	0.495079	2.71528	0.00662189	0.0334447	TIS UP
Blk	1330.33	1.34316	0.354608	3.78772	0.000152038	0.00153997	TIS UP
Gm10925	92687.8	1.34283	0.2989	4.49258	7.03648e-06	0.000120371	TIS UP
Pvrl2	109.409	1.34283	0.437867	3.06674	0.00216407	0.0137118	TIS UP
H2-Ab1	16073.2	1.33584	0.324677	4.11436	3.88262e-05	0.000496868	TIS UP
Olfr1033	1109.93	1.33193	0.459199	2.90055	0.00372504	0.021263	TIS UP
Gbp11	71.1307	1.33126	0.433033	3.07428	0.00211014	0.0134324	TIS UP
Sesn2	1992.61	1.32897	0.285104	4.66135	3.14144e-06	6.03393e-05	TIS UP
H2-K2	518.532	1.32778	0.266092	4.98995	6.03957e-07	1.51098e-05	TIS UP
St3gal1	984.348	1.32778	0.326961	4.06097	4.8869e-05	0.000600483	TIS UP
Nlrp3	364.838	1.32741	0.403431	3.29031	0.00100076	0.00727202	TIS UP
Spsb2	113.939	1.32415	0.433881	3.05187	0.00227424	0.0142758	TIS UP
Gabarapl1	2025.15	1.32151	0.223831	5.90407	3.54637e-09	1.85816e-07	TIS UP
Csrnp1	2470.72	1.32133	0.295987	4.46413	8.03963e-06	0.000134359	TIS UP
Pvr	461.605	1.3177	0.277291	4.75204	2.01379e-06	4.18899e-05	TIS UP
Snap47	1096.84	1.31689	0.207237	6.35452	2.09082e-10	1.54147e-08	TIS UP
Celf4	71.256	1.31554	0.383977	3.42609	0.000612332	0.00488634	TIS UP
Trim30b	102.952	1.31256	0.46257	2.83754	0.0045463	0.0249015	TIS UP
Cdkl2	95.5568	1.31107	0.366675	3.57556	0.000349481	0.00304712	TIS UP
Psap	98724.5	1.30959	0.308815	4.24068	2.22845e-05	0.000311758	TIS UP
Pdk2	787.487	1.30607	0.429103	3.04374	0.0023366	0.0145869	TIS UP
Serpinb6a	599.072	1.30261	0.339038	3.84209	0.000121991	0.00126959	TIS UP
Cacnb1	381.622	1.29829	0.324977	3.99503	6.46857e-05	0.000755815	TIS UP
Nr3c2	44.1081	1.29771	0.500392	2.59338	0.00950364	0.0440717	TIS UP
Nrxn2	588.832	1.2944	0.457972	2.82638	0.00470773	0.0255506	TIS UP
Cmtm3	216.775	1.29164	0.245941	5.25185	1.50583e-07	4.54532e-06	TIS UP
Trim7	370.346	1.2904	0.452361	2.85259	0.00433639	0.0240203	TIS UP
Dtx4	644.494	1.28914	0.384329	3.35428	0.000795729	0.00601836	TIS UP
Hnrnpll	293.083	1.2878	0.340584	3.78115	0.000156105	0.00156963	TIS UP
Prox1	319.131	1.28765	0.496805	2.59186	0.009546	0.0442312	TIS UP
Tmtc3	207.492	1.28613	0.451946	2.84577	0.00443044	0.0243777	TIS UP
Pomgnt2	141.148	1.28589	0.5036	2.55339	0.0106679	0.0484675	TIS UP
Kctd21	75.3354	1.2814	0.414954	3.08807	0.00201463	0.0129156	TIS UP
Emilin1	74.5768	1.281	0.428342	2.9906	0.00278426	0.0168329	TIS UP
Sytl1	82.8124	1.28032	0.43639	2.9339	0.00334736	0.0194673	TIS UP
Tbc1d16	1405.19	1.27971	0.468798	2.72976	0.00633806	0.032328	TIS UP
Casp1	397.906	1.27802	0.30874	4.13946	3.4812e-05	0.00045034	TIS UP
Cyp4v3	141.236	1.26914	0.466835	2.7186	0.00655582	0.0332218	TIS UP
Rgs3	569.176	1.26686	0.448455	2.82495	0.00472882	0.02564	TIS UP
Gstm1	3319.47	1.26058	0.341812	3.68792	0.000226091	0.00211755	TIS UP
Palm2Akap2	135.649	1.25992	0.409864	3.07399	0.00211216	0.0134324	TIS UP
Spock2	74.8725	1.25843	0.4881	2.57822	0.009931	0.0457227	TIS UP
Pvrl1	262.343	1.25535	0.450357	2.78745	0.00531251	0.0281633	TIS UP
Ccng1	13453.2	1.25488	0.362314	3.46351	0.000533184	0.00433362	TIS UP
Lrp4	89.7225	1.25487	0.472033	2.65844	0.00785026	0.0380558	TIS UP
Eps8l2	147.542	1.25377	0.455091	2.75497	0.00586966	0.0305531	TIS UP
Ttc23	55.5654	1.25315	0.474265	2.64229	0.00823464	0.0394638	TIS UP
Numbl	179.289	1.25176	0.305353	4.09937	4.14274e-05	0.000524915	TIS UP
Dennd3	1790.13	1.24908	0.380591	3.28196	0.00103088	0.00744537	TIS UP
Ctsd	11498.5	1.24868	0.183513	6.80432	1.01527e-11	1.09138e-09	TIS UP
Ccdc92	181.015	1.24825	0.445589	2.80136	0.00508882	0.0271762	TIS UP
Zfp831	478.273	1.24796	0.377526	3.30564	0.000947591	0.00694012	TIS UP
Gns	13602.2	1.24678	0.308325	4.04371	5.2612e-05	0.000636155	TIS UP
Gm28437	70591.8	1.24466	0.461396	2.6976	0.00698405	0.0349769	TIS UP
Vash2	94.1369	1.24273	0.449466	2.76489	0.00569415	0.0298352	TIS UP
Hist2h3c1	108.394	1.24179	0.361342	3.43661	0.000589043	0.00472312	TIS UP
Birc3	3942.37	1.23889	0.360721	3.43449	0.00059367	0.00475564	TIS UP
Adm	514.056	1.23757	0.242639	5.10046	3.3883e-07	9.04742e-06	TIS UP
Dusp6	689.535	1.23467	0.453239	2.7241	0.00644764	0.0327532	TIS UP
Vopp1	353.926	1.23182	0.3838	3.20955	0.00132945	0.009222	TIS UP
Snx29	546.887	1.2316	0.220621	5.5824	2.37218e-08	9.54716e-07	TIS UP
Spata6	370.231	1.22779	0.353797	3.47033	0.000519821	0.00424364	TIS UP
Iffo2	309.499	1.22182	0.301518	4.05223	5.07318e-05	0.000618414	TIS UP
Prmt2	234.78	1.22012	0.314112	3.88436	0.0001026	0.00109446	TIS UP
Gm7236	260.54	1.22003	0.444803	2.74287	0.00609056	0.03136	TIS UP
C1ra	304.072	1.2193	0.456437	2.67134	0.007555	0.0369696	TIS UP
Tmem106a	65.6582	1.21618	0.340081	3.57614	0.000348708	0.00304198	TIS UP
Sort1	226.211	1.21534	0.383505	3.16904	0.00152944	0.0103424	TIS UP
Plekhg5	190.993	1.21093	0.380182	3.18514	0.00144683	0.00988401	TIS UP
Wwc2	322.349	1.21002	0.391133	3.09363	0.00197727	0.01273	TIS UP
Lbhd1	647.681	1.20792	0.3498	3.45318	0.000554023	0.00448113	TIS UP
Sept8	424.529	1.20644	0.432182	2.79151	0.00524631	0.0278655	TIS UP
Pkp3	299.124	1.20459	0.345625	3.48525	0.000491686	0.00406735	TIS UP
Zc2hc1a	153.916	1.20444	0.449246	2.68103	0.00733958	0.0362271	TIS UP
Rab11fip3	452.563	1.20338	0.309784	3.8846	0.0001025	0.00109446	TIS UP
Rhbdf1	409.47	1.2031	0.371399	3.23937	0.00119795	0.00844698	TIS UP
Prickle3	284.881	1.20277	0.318449	3.77695	0.000158758	0.00158335	TIS UP
Slc25a35	228.565	1.19979	0.378157	3.17274	0.0015101	0.0102407	TIS UP
Smim3	331.755	1.19903	0.382997	3.13065	0.00174417	0.0114958	TIS UP
Stard10	212.2	1.19762	0.34835	3.43799	0.00058605	0.00470138	TIS UP
Ctss	9363.09	1.19672	0.15577	7.6826	1.55897e-14	3.28804e-12	TIS UP
Tlr12	213.398	1.19402	0.296153	4.03175	5.53622e-05	0.000664586	TIS UP
Gatsl3	102.992	1.19382	0.329759	3.62027	0.000294292	0.00265054	TIS UP
Metrnl	45.134	1.19316	0.430658	2.77055	0.00559609	0.0293676	TIS UP
Gstm4	231.154	1.19186	0.30347	3.92744	8.5856e-05	0.000957518	TIS UP
Spns2	367.097	1.18913	0.370864	3.20636	0.00134424	0.00931825	TIS UP
E030030I06Rik	402.641	1.18714	0.311125	3.81565	0.000135823	0.00139096	TIS UP
Gramd3	1904.4	1.17944	0.338137	3.48804	0.000486566	0.00403543	TIS UP
Dos	175.124	1.17837	0.4588	2.56837	0.0102177	0.0468743	TIS UP
Calcoco1	2193.92	1.17786	0.20584	5.72221	1.05147e-08	4.70957e-07	TIS UP
Aifm2	208.63	1.17452	0.393452	2.98517	0.00283422	0.0170791	TIS UP
Pik3ip1	4131.5	1.17043	0.217034	5.39283	6.93575e-08	2.35844e-06	TIS UP
Tyro3	132.867	1.17015	0.391002	2.99268	0.00276537	0.0167429	TIS UP
Gimap6	2009.23	1.1697	0.35023	3.33979	0.000838405	0.00627798	TIS UP
Jund	13768.8	1.16857	0.244576	4.77792	1.77119e-06	3.75943e-05	TIS UP
Lipa	2137.35	1.16595	0.30534	3.81852	0.000134252	0.00137741	TIS UP
Cd55	3515.15	1.15994	0.354196	3.27485	0.00105718	0.00759912	TIS UP
Kif9	113.602	1.15858	0.287798	4.02566	5.68148e-05	0.000677629	TIS UP
Fchsd1	590.69	1.15329	0.399606	2.88606	0.00390096	0.0220182	TIS UP
Sema4b	4236.18	1.15212	0.20707	5.56393	2.63773e-08	1.05395e-06	TIS UP
H2-Q10	282.762	1.14859	0.306583	3.74643	0.000179366	0.00175531	TIS UP
Caskin2	282.481	1.14853	0.26953	4.26125	2.03283e-05	0.000288756	TIS UP
Pld3	1436.52	1.14848	0.259875	4.41936	9.89933e-06	0.000158482	TIS UP
Tbx6	74.9564	1.14752	0.44201	2.59614	0.00942784	0.043819	TIS UP
Tmem230	1000.08	1.14528	0.290944	3.93643	8.27027e-05	0.000927317	TIS UP
Tlr9	1546.03	1.14396	0.278737	4.10409	4.05912e-05	0.000516283	TIS UP
Dstyk	285.806	1.143	0.335557	3.40627	0.00065856	0.00518079	TIS UP
Abr	660.061	1.14188	0.29275	3.90051	9.59894e-05	0.00103788	TIS UP
Ighv5-17	138.823	1.14159	0.390312	2.92481	0.00344664	0.0199334	TIS UP
Atp1b1	2708.81	1.13858	0.31928	3.5661	0.00036234	0.00313138	TIS UP
Btg1	6130.03	1.13654	0.194543	5.84208	5.15531e-09	2.50431e-07	TIS UP
Nr4a3	130	1.13608	0.437914	2.5943	0.0094785	0.0439796	TIS UP
Fmo5	116.998	1.13229	0.280458	4.03729	5.40722e-05	0.000649702	TIS UP
Cplx2	2576.37	1.12861	0.302145	3.73532	0.000187477	0.00182461	TIS UP
Irf5	5603.66	1.12748	0.22416	5.02981	4.90967e-07	1.26048e-05	TIS UP
mt-Nd5	69211.5	1.12692	0.255532	4.41008	1.03333e-05	0.000164566	TIS UP
Adam15	1287.87	1.12537	0.419834	2.68052	0.00735072	0.0362575	TIS UP
Cndp2	3370.26	1.12186	0.398652	2.81412	0.00489102	0.0263307	TIS UP
Myadm	594.129	1.12089	0.286333	3.91465	9.05343e-05	0.000995698	TIS UP
Pik3r3	1044.79	1.12074	0.311376	3.59932	0.000319056	0.00282922	TIS UP
Pnpla7	4351.73	1.12008	0.265294	4.22203	2.42111e-05	0.000333117	TIS UP
AW209491	113.957	1.11836	0.352125	3.17604	0.001493	0.0101475	TIS UP
Cep170b	1878.75	1.11751	0.290833	3.84245	0.000121813	0.00126853	TIS UP
Gm7609	359.48	1.10976	0.395174	2.80828	0.00498073	0.0267275	TIS UP
Slc25a20	1019.01	1.10857	0.152875	7.25152	4.12126e-13	6.18635e-11	TIS UP
Zfhx2	502.65	1.10283	0.345803	3.1892	0.00142669	0.00978252	TIS UP
Tnfaip8l2	1042.82	1.10027	0.297524	3.6981	0.000217223	0.00204948	TIS UP
mt-Atp8	11986.6	1.09964	0.309041	3.55823	0.000373366	0.00321168	TIS UP
Cat	10168.2	1.09883	0.260821	4.21296	2.52044e-05	0.000343662	TIS UP
Psg23	355.566	1.09751	0.227922	4.81528	1.46997e-06	3.22696e-05	TIS UP
Stk17b	5710.8	1.09361	0.253564	4.31295	1.61092e-05	0.000239455	TIS UP
Snx19	1912.73	1.09176	0.227875	4.79106	1.659e-06	3.56675e-05	TIS UP
Nfkbia	4084.19	1.0855	0.283869	3.82396	0.000131328	0.00135407	TIS UP
Wfs1	255.802	1.08507	0.263562	4.11694	3.83944e-05	0.00049172	TIS UP
Sgpl1	2639.69	1.0845	0.202214	5.36315	8.1784e-08	2.70911e-06	TIS UP
Tnip1	2031.49	1.08121	0.28965	3.73281	0.000189356	0.00183719	TIS UP
Epha2	2327.49	1.08069	0.385884	2.80056	0.00510142	0.0272254	TIS UP
Ctif	281.381	1.07985	0.382059	2.8264	0.00470743	0.0255506	TIS UP
Crem	796.311	1.07485	0.386002	2.78458	0.00535975	0.0283685	TIS UP
Tmem8	344.921	1.07473	0.260902	4.11931	3.8001e-05	0.000487541	TIS UP
Cyp4f17	102.662	1.07473	0.32119	3.34609	0.000819586	0.00616521	TIS UP
Maged2	201.847	1.07241	0.420801	2.54849	0.0108191	0.0489859	TIS UP
Sgsm1	544.794	1.0723	0.290729	3.6883	0.000225756	0.0021156	TIS UP
Cyb561a3	10258.8	1.06968	0.154842	6.90819	4.90861e-12	5.60187e-10	TIS UP
Pgap1	257.211	1.06838	0.390882	2.73325	0.00627119	0.0320551	TIS UP
Sp140	6106.76	1.06757	0.293851	3.63304	0.000280102	0.00254349	TIS UP
Frmd6	302.352	1.0661	0.358473	2.97399	0.00293955	0.0175426	TIS UP
Rhob	2947.59	1.06574	0.202062	5.27431	1.33259e-07	4.12708e-06	TIS UP
Zfp365	352.365	1.06306	0.389189	2.73147	0.00630515	0.032216	TIS UP
Cpt1a	3061.5	1.06091	0.318115	3.33501	0.000852977	0.00636467	TIS UP
Ppfibp2	259.391	1.0583	0.402257	2.6309	0.00851584	0.0404409	TIS UP
1700009P17Rik	105.866	1.05747	0.392365	2.69512	0.00703641	0.0351863	TIS UP
Zfp385a	3606.2	1.05523	0.257551	4.09718	4.18213e-05	0.0005287	TIS UP
Rhbdf2	912.013	1.05478	0.309063	3.41284	0.000642896	0.00508156	TIS UP
Csprs	1142.9	1.05417	0.375905	2.80437	0.00504154	0.0269785	TIS UP
Tg	113.564	1.05054	0.324349	3.23891	0.00119986	0.00845688	TIS UP
Tbxa2r	466.427	1.05018	0.313514	3.34969	0.00080901	0.00609943	TIS UP
Ciita	2495.67	1.05003	0.380982	2.75612	0.00584913	0.0304747	TIS UP
Rab13	65.0047	1.04928	0.399367	2.62736	0.00860492	0.0407432	TIS UP
Pttg1ip	2271.9	1.04834	0.222847	4.70429	2.54749e-06	5.081e-05	TIS UP
mt-Nd4	75920.4	1.04763	0.271906	3.85292	0.000116718	0.00122494	TIS UP
Irs2	4015.93	1.04716	0.398545	2.62746	0.0086025	0.0407432	TIS UP
Dpy19l3	458.228	1.04641	0.302363	3.46078	0.000538617	0.00436712	TIS UP
Ccpg1	2743.3	1.04637	0.207404	5.04508	4.5334e-07	1.17657e-05	TIS UP
Cd151	563.909	1.04318	0.262511	3.97387	7.07152e-05	0.000812031	TIS UP
Fam101b	121.434	1.0397	0.355735	2.92267	0.0034704	0.0200276	TIS UP
Exoc6b	402.622	1.03925	0.248631	4.17989	2.91648e-05	0.000388135	TIS UP
Dyrk3	2951.32	1.03735	0.211626	4.9018	9.49613e-07	2.22851e-05	TIS UP
mt-Cytb	151596	1.03613	0.281819	3.67658	0.00023638	0.00219786	TIS UP
Ctsz	18798.6	1.03576	0.190116	5.44802	5.09346e-08	1.82903e-06	TIS UP
Fth1	80129.2	1.03519	0.194076	5.33392	9.61136e-08	3.1096e-06	TIS UP
Eogt	108.36	1.03463	0.306529	3.3753	0.000737344	0.00566158	TIS UP
Ftl1	49141.4	1.03388	0.306725	3.37071	0.000749759	0.00573576	TIS UP
Acox3	2685.42	1.033	0.243149	4.24843	2.15269e-05	0.000303197	TIS UP
Sphk2	2208.31	1.03268	0.152266	6.7821	1.18443e-11	1.25178e-09	TIS UP
Anxa4	553.668	1.02756	0.272115	3.7762	0.000159236	0.00158589	TIS UP
Zfp202	223.197	1.02425	0.352878	2.90255	0.00370137	0.0211641	TIS UP
Psen2	2018.65	1.02204	0.23519	4.34556	1.38918e-05	0.00021119	TIS UP
Cd2	2866.63	1.02053	0.391238	2.60847	0.00909476	0.0425188	TIS UP
Mob3a	2116.63	1.01911	0.209406	4.86665	1.13506e-06	2.5943e-05	TIS UP
Fosl2	616.828	1.01786	0.382305	2.66243	0.00775777	0.0377402	TIS UP
Gm5421	214.428	1.0177	0.389426	2.61333	0.00896646	0.0420843	TIS UP
Itm2b	13201.9	1.01726	0.227056	4.48021	7.45697e-06	0.000126397	TIS UP
Acad12	611.634	1.0165	0.324766	3.12996	0.00174833	0.0115113	TIS UP
Nfkb2	1949.12	1.01584	0.260576	3.89846	9.6808e-05	0.00104402	TIS UP
Slc48a1	2270.5	1.01482	0.193084	5.25586	1.47332e-07	4.47148e-06	TIS UP
Gm7120	466.482	1.01466	0.398484	2.54629	0.0108874	0.049255	TIS UP
Dmxl2	142.176	1.01426	0.374871	2.70562	0.00681762	0.0342877	TIS UP
Gm17132	172.213	1.01361	0.391632	2.58818	0.00964848	0.0446068	TIS UP
Plekhm3	1243.06	1.01242	0.335796	3.01499	0.00256987	0.015783	TIS UP
Cebpb	536.65	1.01241	0.24144	4.19321	2.75041e-05	0.000370771	TIS UP
Mroh1	1760.3	1.01171	0.228929	4.41931	9.90155e-06	0.000158482	TIS UP
Exoc4	6597.78	1.00948	0.300716	3.35694	0.000788094	0.00597145	TIS UP
Abca5	240.856	1.00817	0.297678	3.38679	0.000707147	0.00548277	TIS UP
Tmem86a	84.1122	1.00796	0.315595	3.19383	0.00140398	0.00965063	TIS UP
Fam214a	2168.84	1.00751	0.268455	3.75298	0.000174747	0.00171677	TIS UP
Rhobtb1	216.84	1.00719	0.38125	2.64181	0.00824654	0.0394952	TIS UP
Vat1	1013.62	1.00689	0.393501	2.55879	0.0105036	0.0479484	TIS UP
Dcxr	735.882	1.00679	0.284764	3.53551	0.000406984	0.00346331	TIS UP
Phyhip	190.676	1.00611	0.338304	2.97399	0.00293954	0.0175426	TIS UP
Tbc1d2	125.407	1.00594	0.333461	3.01666	0.00255577	0.0157079	TIS UP
Ms4a4a	118.644	1.00233	0.347214	2.88678	0.00389202	0.0219827	TIS UP
1110008P14Rik	669.713	1.00201	0.186633	5.36886	7.92361e-08	2.64576e-06	TIS UP
Relb	922.1	1.00127	0.361674	2.76844	0.00563254	0.0295496	TIS UP
Evi2a	898.482	1.0012	0.287281	3.48508	0.000491983	0.00406735	TIS UP
Grina	3390.12	0.999435	0.226622	4.41014	1.03303e-05	0.000164566	TIS UP
Leng9	175.265	0.996731	0.259338	3.84336	0.00012136	0.0012654	TIS UP
Ppp1r15a	3864.55	0.996239	0.234167	4.2544	2.09609e-05	0.000296226	TIS UP
Tmsb4x	24248.7	0.995469	0.294549	3.37963	0.000725827	0.00559377	TIS UP
Gm13769	175.571	0.994327	0.369537	2.69074	0.00712941	0.0354915	TIS UP
Nfkbie	1022.47	0.992017	0.349675	2.83697	0.00455439	0.0249294	TIS UP
Zbtb7b	1107.01	0.991899	0.302769	3.2761	0.00105253	0.00756892	TIS UP
Gtf2ird1	363.421	0.991847	0.374056	2.6516	0.00801119	0.0386234	TIS UP
Itgb2	3274.64	0.990819	0.207473	4.77564	1.79135e-06	3.79256e-05	TIS UP
Nuak2	1583.8	0.988116	0.21312	4.63643	3.5448e-06	6.69297e-05	TIS UP
Ticam1	762.616	0.987688	0.175024	5.64316	1.66957e-08	7.09651e-07	TIS UP
Unc93b1	24864.8	0.979526	0.219994	4.45251	8.48724e-06	0.000140153	TIS UP
Dip2c	509.719	0.979103	0.341469	2.86733	0.0041395	0.0231373	TIS UP
Tlr2	295.698	0.978655	0.297591	3.2886	0.00100689	0.00730693	TIS UP
Pqlc1	1217.84	0.977255	0.171957	5.68315	1.32235e-08	5.78293e-07	TIS UP
Amigo2	343.431	0.976331	0.328999	2.96758	0.00300153	0.0178294	TIS UP
Chid1	1671.83	0.975619	0.229221	4.25624	2.07894e-05	0.000294052	TIS UP
Ivd	7189.59	0.974916	0.223453	4.36295	1.28317e-05	0.00019651	TIS UP
Olfr118	78.8217	0.973535	0.382961	2.54212	0.0110181	0.0496842	TIS UP
Zfp52	880.309	0.972449	0.309588	3.14111	0.00168311	0.0111596	TIS UP
Mvp	1627.56	0.971329	0.185037	5.24937	1.52618e-07	4.57386e-06	TIS UP
Ly6e	43394.8	0.96733	0.254189	3.80555	0.00014149	0.00144278	TIS UP
Slc7a7	1276.31	0.966304	0.261413	3.69647	0.000218618	0.00205855	TIS UP
Il5ra	210.687	0.964586	0.358752	2.68872	0.00717256	0.0356333	TIS UP
Tmem104	745.08	0.964419	0.27184	3.54775	0.000388537	0.00333014	TIS UP
Irgq	2366.84	0.963315	0.277821	3.46739	0.000525537	0.00427981	TIS UP
Ctsb	12388.2	0.962503	0.192004	5.01294	5.36057e-07	1.35948e-05	TIS UP
Ccdc157	185.364	0.961872	0.341514	2.81649	0.00485514	0.0261716	TIS UP
Ryr1	153.511	0.961408	0.353444	2.72011	0.00652599	0.0330982	TIS UP
Letm2	200.342	0.960868	0.226855	4.2356	2.27944e-05	0.0003165	TIS UP
Dhx57	1772.71	0.960365	0.229378	4.18683	2.82879e-05	0.000378886	TIS UP
Dpm1	1187.53	0.959783	0.222243	4.31861	1.57014e-05	0.000234214	TIS UP
Bin2	2264.31	0.959438	0.331749	2.89206	0.0038272	0.0217048	TIS UP
Fuca1	2708.31	0.956132	0.178004	5.37141	7.81223e-08	2.62434e-06	TIS UP
D17H6S53E	213.431	0.955802	0.307307	3.11026	0.00186926	0.0121615	TIS UP
Gm8369	4149.83	0.952322	0.329235	2.89253	0.00382153	0.0216948	TIS UP
Mttp	994.24	0.95179	0.210171	4.52865	5.93627e-06	0.000104667	TIS UP
Irf1	2888.62	0.951572	0.146562	6.49263	8.43522e-11	6.9578e-09	TIS UP
Bcl6	325.895	0.951016	0.310867	3.05924	0.00221902	0.014005	TIS UP
Btg2	13632.4	0.950392	0.259402	3.66378	0.000248517	0.00229788	TIS UP
Tnfrsf10b	347.351	0.950369	0.335254	2.83477	0.00458586	0.0250688	TIS UP
Tcp11l2	5511.02	0.948866	0.223895	4.238	2.25516e-05	0.000314263	TIS UP
Lphn2	3040.28	0.948455	0.305429	3.10532	0.00190072	0.0123325	TIS UP
Rell2	213.464	0.948351	0.353158	2.68535	0.00724542	0.0358868	TIS UP
Junb	5256.13	0.948147	0.158684	5.97506	2.30012e-09	1.27324e-07	TIS UP
S1pr1	3873.58	0.946378	0.333789	2.83526	0.0045789	0.02504	TIS UP
Smap2	5155.74	0.945375	0.147951	6.38978	1.6612e-10	1.26967e-08	TIS UP
Hist1h1c	2982.2	0.944734	0.299903	3.15013	0.00163195	0.0109115	TIS UP
Zfp658	254.254	0.942613	0.23531	4.00584	6.17974e-05	0.000726142	TIS UP
Agpat4	438.267	0.937267	0.247885	3.78106	0.000156163	0.00156963	TIS UP
mt-Nd4l	6003.95	0.935585	0.228318	4.09773	4.1723e-05	0.000527858	TIS UP
H2-Eb2	2295.21	0.935328	0.258542	3.61771	0.000297225	0.00267117	TIS UP
Cyth3	1038.12	0.934702	0.296445	3.15304	0.00161582	0.0108211	TIS UP
Cbr1	500.312	0.934338	0.308845	3.02526	0.0024842	0.015343	TIS UP
Ceacam1	1686.31	0.934098	0.278328	3.3561	0.000790497	0.00598421	TIS UP
Tmcc3	809.341	0.932027	0.235538	3.95701	7.58935e-05	0.000862577	TIS UP
Gpr18	318.327	0.931347	0.354894	2.62429	0.00868287	0.041019	TIS UP
Mxd4	13540.8	0.930955	0.333384	2.79244	0.00523128	0.0278034	TIS UP
Gm16026	487.125	0.930783	0.329621	2.82379	0.00474589	0.0256657	TIS UP
4933426M11Rik	3743.18	0.927137	0.159968	5.79577	6.80069e-09	3.19192e-07	TIS UP
Psrc1	2769.4	0.925349	0.360623	2.56597	0.0102886	0.0471348	TIS UP
Tgfbr2	5293.7	0.92506	0.229629	4.02849	5.61351e-05	0.000672411	TIS UP
Npc1	1009.02	0.922537	0.188855	4.88489	1.03485e-06	2.40148e-05	TIS UP
Slc2a9	496.323	0.92103	0.205084	4.49098	7.0895e-06	0.00012103	TIS UP
Aldh3b1	6685.99	0.919806	0.275565	3.33789	0.000844166	0.00631306	TIS UP
Tapbp	9319.48	0.919684	0.183461	5.01296	5.36003e-07	1.35948e-05	TIS UP
Ddah2	160.897	0.915106	0.352452	2.5964	0.00942068	0.0438089	TIS UP
Dnajb9	1383.09	0.914624	0.228653	4.00006	6.33262e-05	0.000743057	TIS UP
Xdh	482.918	0.912009	0.347257	2.62632	0.00863124	0.040833	TIS UP
Yipf2	683.399	0.910629	0.327245	2.78271	0.0053907	0.0284691	TIS UP
Cpne8	1510.58	0.910159	0.172388	5.27973	1.29377e-07	4.01431e-06	TIS UP
Tmem120a	642.2	0.910067	0.348339	2.61259	0.00898582	0.0421514	TIS UP
4930402H24Rik	437.439	0.90978	0.264549	3.43899	0.00058389	0.00468857	TIS UP
Arrdc3	2055.91	0.90504	0.280706	3.22416	0.00126343	0.00883023	TIS UP
Gpr137	548.07	0.904814	0.244579	3.69948	0.000216045	0.00204183	TIS UP
St14	449.151	0.903209	0.293527	3.07709	0.00209033	0.0133241	TIS UP
Plekho2	3416.51	0.902638	0.234409	3.8507	0.000117782	0.00123225	TIS UP
Slc29a3	1619.86	0.902622	0.256688	3.51641	0.000437422	0.00369403	TIS UP
Anxa5	1084	0.897594	0.232543	3.85991	0.00011343	0.00119846	TIS UP
Lamp1	16747.8	0.897094	0.175006	5.12608	2.95831e-07	8.07412e-06	TIS UP
mt-Co3	136195	0.895271	0.328383	2.7263	0.00640479	0.0325653	TIS UP
Gaa	5667.73	0.893786	0.223669	3.99603	6.44148e-05	0.000754237	TIS UP
Cnbd2	154.453	0.893344	0.287035	3.11232	0.00185623	0.0121004	TIS UP
Gm8730	22050.4	0.892555	0.34274	2.60417	0.00920966	0.0429502	TIS UP
Slc31a2	114.762	0.890628	0.273638	3.25477	0.00113485	0.00806378	TIS UP
A530054K11Rik	3451.49	0.890256	0.345215	2.57884	0.00991314	0.0456705	TIS UP
Naga	2053.15	0.888541	0.251225	3.53684	0.000404948	0.00344951	TIS UP
Dapp1	1312.67	0.887457	0.261692	3.39122	0.000695811	0.00540999	TIS UP
Pigo	1193.71	0.885107	0.300387	2.94655	0.00321337	0.0188709	TIS UP
Ank	2008.71	0.883678	0.174272	5.07067	3.96412e-07	1.04016e-05	TIS UP
H2-D1	38106	0.88281	0.213539	4.13419	3.56201e-05	0.000458898	TIS UP
Il2rg	6085.66	0.882417	0.30294	2.91285	0.00358152	0.0205635	TIS UP
Dusp1	648.359	0.882146	0.331716	2.65934	0.00782938	0.0379998	TIS UP
Pip4k2c	1731.97	0.882011	0.187001	4.71663	2.39789e-06	4.8195e-05	TIS UP
Igf2r	5226.81	0.880466	0.289888	3.03726	0.00238736	0.0148537	TIS UP
Ralgds	1164.99	0.880377	0.331174	2.65835	0.00785234	0.0380558	TIS UP
Gm10116	1040.66	0.877909	0.303414	2.89343	0.00381055	0.0216454	TIS UP
Nfkbid	1197.47	0.877295	0.191392	4.58376	4.56693e-06	8.31631e-05	TIS UP
Gm29609	409.967	0.876209	0.264911	3.30755	0.000941144	0.00690504	TIS UP
Reep6	581.727	0.87609	0.322451	2.71697	0.00658822	0.033315	TIS UP
Dusp14	147.469	0.873924	0.320903	2.72333	0.00646284	0.0328004	TIS UP
Lrrc41	3064.26	0.87048	0.284664	3.05792	0.00222879	0.0140507	TIS UP
Nudt18	584.956	0.868654	0.278232	3.12205	0.00179598	0.0117767	TIS UP
Bmf	4569.08	0.86845	0.280028	3.1013	0.00192675	0.0124771	TIS UP
Ubtd1	417.173	0.868449	0.26477	3.28002	0.001038	0.00748384	TIS UP
Triobp	2513.03	0.867816	0.20457	4.24214	2.21398e-05	0.000310255	TIS UP
H2-K1	34179.1	0.866728	0.228511	3.79293	0.000148878	0.00151348	TIS UP
1110007C09Rik	285.991	0.863516	0.251457	3.43405	0.000594627	0.00476102	TIS UP
Man2b2	3661.65	0.862693	0.196701	4.3858	1.15559e-05	0.000179445	TIS UP
Unc119	839.831	0.862081	0.202038	4.26693	1.98185e-05	0.00028272	TIS UP
Napsa	11872.4	0.861712	0.209291	4.1173	3.83338e-05	0.000491321	TIS UP
Suox	424.878	0.858803	0.262781	3.26813	0.00108262	0.00775851	TIS UP
Map3k12	151.41	0.856592	0.314059	2.72748	0.00638193	0.0324788	TIS UP
Akap2	600.263	0.855729	0.316907	2.70025	0.00692865	0.0347286	TIS UP
Furin	2174.91	0.854537	0.296289	2.88413	0.00392492	0.022131	TIS UP
Jdp2	200.041	0.853761	0.311928	2.73705	0.00619933	0.0318021	TIS UP
Bmp2k	882.871	0.852537	0.27854	3.06074	0.00220793	0.0139509	TIS UP
Olfr1152	496.435	0.851477	0.273148	3.11728	0.0018253	0.0119314	TIS UP
Map3k14	1155.63	0.850697	0.204115	4.16773	3.07654e-05	0.00040603	TIS UP
Dnmbp	370.345	0.849697	0.24798	3.42648	0.00061147	0.00488414	TIS UP
Tmem205	321.34	0.849383	0.32668	2.60005	0.00932115	0.0434309	TIS UP
C030017K20Rik	391.408	0.849335	0.283922	2.99144	0.00277666	0.0167991	TIS UP
Dhtkd1	298.652	0.848213	0.301212	2.81601	0.00486249	0.0261942	TIS UP
Adamts13	475.789	0.846855	0.216078	3.91921	8.88405e-05	0.000979008	TIS UP
Slc25a19	2235.56	0.84632	0.175182	4.83108	1.35791e-06	3.02481e-05	TIS UP
Pik3r5	663.038	0.84612	0.284209	2.97711	0.00290981	0.0174275	TIS UP
Socs5	570.388	0.846083	0.252549	3.35017	0.000807615	0.00609442	TIS UP
Ptprj	7839.24	0.845718	0.258943	3.26604	0.00109061	0.00779903	TIS UP
Cd82	810.156	0.845555	0.310862	2.72004	0.00652746	0.0330982	TIS UP
Rnf11	924.475	0.842799	0.224513	3.7539	0.000174107	0.0017135	TIS UP
Filip1l	1579.72	0.842458	0.273272	3.08286	0.00205025	0.0131037	TIS UP
Zfp36	4271.88	0.839453	0.244648	3.43127	0.000600763	0.00480553	TIS UP
Plekhb2	2065.13	0.837356	0.156484	5.35107	8.74346e-08	2.85654e-06	TIS UP
Tmbim1	1944.38	0.836537	0.204398	4.09268	4.2642e-05	0.000536633	TIS UP
Ppp3ca	7371.49	0.835244	0.224863	3.71446	0.000203641	0.00194288	TIS UP
Crebl2	334.932	0.8351	0.326799	2.5554	0.0106067	0.0482661	TIS UP
Aldh4a1	1302.95	0.832593	0.299719	2.77792	0.00547088	0.0287921	TIS UP
Slc52a2	839.242	0.832202	0.250738	3.31902	0.000903351	0.00667478	TIS UP
Pde4a	1396.72	0.831638	0.218581	3.80471	0.000141973	0.00144682	TIS UP
Zdhhc24	591.968	0.831329	0.223003	3.72788	0.000193098	0.00186624	TIS UP
Atg2a	5607.69	0.828846	0.207441	3.99557	6.45396e-05	0.000755168	TIS UP
Nipal3	1776.72	0.827983	0.290139	2.85375	0.00432062	0.0239728	TIS UP
Bcl2l11	7250.7	0.825626	0.220476	3.74475	0.000180574	0.00176361	TIS UP
2810474O19Rik	4177.28	0.824173	0.193002	4.27028	1.95225e-05	0.000279693	TIS UP
Card6	2395.88	0.823931	0.259426	3.17598	0.00149332	0.0101475	TIS UP
Tmem173	4430.74	0.82361	0.283514	2.90501	0.00367243	0.0210275	TIS UP
Mier2	599.43	0.822783	0.301508	2.72889	0.00635475	0.0323864	TIS UP
Dnajb5	418.552	0.821806	0.321912	2.55289	0.0106834	0.0484902	TIS UP
Tcta	443.2	0.820731	0.252265	3.25345	0.00114012	0.00809751	TIS UP
Vps37a	821.696	0.820658	0.247408	3.31702	0.000909827	0.00669646	TIS UP
Gm28438	11196.8	0.819107	0.306463	2.67278	0.00752261	0.0368652	TIS UP
Dpp7	1529.97	0.818109	0.254531	3.21418	0.00130816	0.00909703	TIS UP
Txndc16	3103.92	0.81776	0.270492	3.02323	0.00250091	0.0154162	TIS UP
Notch1	3562.86	0.814501	0.295306	2.75816	0.00581284	0.0303331	TIS UP
Fbrs	4827.54	0.814481	0.226877	3.58997	0.000330712	0.00291706	TIS UP
Slc28a2	1548.7	0.814022	0.30418	2.67612	0.00744807	0.0366292	TIS UP
Asah2	246.874	0.812495	0.316458	2.56746	0.0102445	0.0469844	TIS UP
mt-Co1	497815	0.812399	0.297947	2.72665	0.00639805	0.0325509	TIS UP
Tnfrsf1b	1549.65	0.812039	0.291534	2.7854	0.0053462	0.0283058	TIS UP
Gpr107	1893.03	0.811479	0.21304	3.80905	0.000139504	0.0014234	TIS UP
Parp8	666.712	0.811251	0.270864	2.99505	0.00274403	0.016638	TIS UP
P2rx4	891.331	0.810738	0.196111	4.13407	3.56389e-05	0.000458898	TIS UP
Gba	2839.52	0.809432	0.206882	3.91254	9.13311e-05	0.00100182	TIS UP
Zmiz2	8393.39	0.807417	0.248067	3.25483	0.00113459	0.00806378	TIS UP
Rmdn1	198.245	0.806811	0.242616	3.32546	0.000882728	0.0065369	TIS UP
Pcnx	1832.12	0.805974	0.256764	3.13897	0.00169543	0.0112234	TIS UP
R3hdm2	4184.05	0.805683	0.247774	3.25169	0.0011472	0.00814081	TIS UP
Slc27a4	781.456	0.802842	0.237715	3.37733	0.000731938	0.00562526	TIS UP
Prkcd	11666.2	0.802148	0.182423	4.39719	1.0966e-05	0.000172698	TIS UP
Hdac11	496.345	0.801391	0.240465	3.33267	0.000860172	0.00640688	TIS UP
Wdr81	2852.27	0.796671	0.235422	3.38401	0.000714343	0.00552571	TIS UP
Coq10b	323.802	0.796022	0.215144	3.69995	0.000215644	0.00203919	TIS UP
Dgka	2473.43	0.794248	0.27888	2.84799	0.00439963	0.0242737	TIS UP
Mllt11	350.93	0.793722	0.300783	2.63885	0.00831877	0.0397156	TIS UP
Tmem184b	2993.06	0.791179	0.274603	2.88117	0.00396204	0.0223026	TIS UP
Cnnm2	185.346	0.790939	0.263091	3.00634	0.00264416	0.0161322	TIS UP
Aplp2	4656.77	0.790321	0.272348	2.90188	0.0037093	0.0211949	TIS UP
Mzb1	32370.6	0.789447	0.2067	3.8193	0.000133832	0.00137394	TIS UP
Tprgl	3563.42	0.788327	0.249986	3.15348	0.00161334	0.0108088	TIS UP
Creb3	716.253	0.78752	0.193861	4.06228	4.85951e-05	0.000598	TIS UP
Cyb5r3	2242.67	0.786849	0.227674	3.45604	0.000548184	0.00443606	TIS UP
Lrrc8d	1180.42	0.784114	0.173967	4.50726	6.56702e-06	0.000113506	TIS UP
1700017B05Rik	9596.53	0.783832	0.151504	5.17369	2.29521e-07	6.51495e-06	TIS UP
Plod3	2324.9	0.782962	0.202102	3.8741	0.000107021	0.00113651	TIS UP
Clec2i	1713.95	0.778598	0.244504	3.1844	0.00145053	0.00990116	TIS UP
Slc12a4	597.428	0.778205	0.25032	3.10884	0.00187822	0.0122103	TIS UP
Pla2g6	1069.97	0.777186	0.195959	3.96606	7.30699e-05	0.000834469	TIS UP
Sat1	3089.93	0.776486	0.199723	3.88781	0.000101152	0.00108246	TIS UP
Ctsa	10221.3	0.775537	0.173168	4.47852	7.51629e-06	0.000127026	TIS UP
Zrsr1	407.939	0.775048	0.245913	3.15172	0.00162312	0.0108656	TIS UP
Cd97	6596.85	0.773877	0.24605	3.1452	0.00165974	0.0110796	TIS UP
Bach1	1784.41	0.77108	0.225453	3.42014	0.000625889	0.00497072	TIS UP
Zfp36l1	6989.07	0.768206	0.182004	4.22082	2.43414e-05	0.000334634	TIS UP
Klhl14	410.406	0.768199	0.220585	3.48255	0.00049667	0.00409476	TIS UP
Prcp	3256.83	0.767748	0.16702	4.59674	4.29163e-06	7.91884e-05	TIS UP
Hsd17b11	1695.88	0.767348	0.236873	3.2395	0.00119741	0.00844678	TIS UP
Aga	786.858	0.764139	0.263797	2.89669	0.0037712	0.0214676	TIS UP
Mlycd	912.181	0.760103	0.242125	3.1393	0.00169351	0.0112151	TIS UP
Tldc1	541.081	0.759576	0.205161	3.70234	0.00021362	0.0020235	TIS UP
Sdhaf1	1495.05	0.757855	0.148287	5.11074	3.20898e-07	8.60998e-06	TIS UP
Vmp1	2107.46	0.755137	0.209373	3.60666	0.000310167	0.00275774	TIS UP
Gpr132	3487.76	0.754576	0.141099	5.34786	8.8998e-08	2.89626e-06	TIS UP
Capn1	1908.63	0.753769	0.220493	3.41855	0.00062955	0.00499467	TIS UP
Ubc	88137	0.753009	0.263418	2.85861	0.00425507	0.0236642	TIS UP
Bphl	846.976	0.752869	0.248805	3.02594	0.0024786	0.0153241	TIS UP
Ptger4	914.183	0.751375	0.265698	2.82793	0.00468494	0.0254933	TIS UP
Blnk	17863.9	0.751299	0.177353	4.23618	2.27352e-05	0.000315942	TIS UP
Arid5b	910.777	0.750692	0.246475	3.04571	0.00232128	0.014513	TIS UP
Ldlrap1	3322.95	0.750624	0.239721	3.13124	0.00174071	0.0114775	TIS UP
Elk3	773.279	0.750007	0.217392	3.45003	0.000560525	0.00452932	TIS UP
Fam109a	283.701	0.747595	0.250221	2.98774	0.00281046	0.0169666	TIS UP
Prr13	3056.59	0.746876	0.207526	3.59895	0.000319508	0.00283173	TIS UP
Snap23	1091.95	0.745901	0.185932	4.01168	6.02888e-05	0.00071193	TIS UP
Slc39a11	1430.56	0.745731	0.263944	2.82534	0.004723	0.0256251	TIS UP
Notch2	5628.58	0.745593	0.223252	3.33969	0.000838722	0.00627798	TIS UP
Oaz2	2343.43	0.745449	0.176656	4.21978	2.4454e-05	0.000335905	TIS UP
Galnt11	1323.57	0.744317	0.280988	2.64893	0.00807477	0.0388849	TIS UP
Rps2-ps10	12263.4	0.743933	0.289323	2.57128	0.0101322	0.0465207	TIS UP
Sesn3	3024.42	0.743616	0.183693	4.04813	5.16279e-05	0.000625618	TIS UP
Tmem123	9303.14	0.742013	0.181854	4.08027	4.49843e-05	0.000562287	TIS UP
Aldh2	44481.7	0.741803	0.228352	3.2485	0.00116015	0.00821521	TIS UP
Rnf185	1174.71	0.7409	0.168919	4.38614	1.1538e-05	0.000179334	TIS UP
Ghdc	461.457	0.738591	0.277813	2.65859	0.00784694	0.0380517	TIS UP
Rnasek	2020.35	0.737282	0.224528	3.2837	0.00102456	0.00740936	TIS UP
Hivep1	1875.35	0.73464	0.228159	3.21985	0.00128257	0.00894898	TIS UP
Cds2	5972.52	0.731293	0.269304	2.71549	0.00661772	0.0334337	TIS UP
Herc2	4194.05	0.730672	0.238157	3.06803	0.00215475	0.0136641	TIS UP
Fgf11	800.963	0.729399	0.234795	3.10653	0.00189297	0.0122906	TIS UP
Scpep1	4002.66	0.726834	0.171035	4.24962	2.14132e-05	0.00030185	TIS UP
Fam213a	362.075	0.726296	0.249902	2.90632	0.00365702	0.0209537	TIS UP
Glmp	3269.49	0.726109	0.212335	3.41964	0.000627033	0.00497743	TIS UP
Irf8	6031.33	0.726089	0.261248	2.77931	0.00544745	0.0287069	TIS UP
Tbc1d17	2898.05	0.725228	0.248919	2.91351	0.00357389	0.020542	TIS UP
Arsk	493.377	0.724636	0.230747	3.14039	0.00168723	0.011178	TIS UP
Fbxo32	692.014	0.724215	0.264842	2.73451	0.00624728	0.0319791	TIS UP
Ipo4	6011.33	0.723917	0.176139	4.10992	3.95795e-05	0.000505344	TIS UP
Gnat2	200.213	0.722974	0.268499	2.69265	0.00708857	0.0353305	TIS UP
Zfp592	4547.5	0.721031	0.25301	2.84981	0.00437449	0.024175	TIS UP
Trib1	4499.45	0.720428	0.282288	2.5521	0.0107076	0.0485576	TIS UP
Tpp1	4835.06	0.719258	0.176457	4.07612	4.57941e-05	0.00057027	TIS UP
Rtn4	4807.41	0.717774	0.215509	3.3306	0.000866587	0.00645177	TIS UP
Samhd1	13658.6	0.71724	0.160478	4.46939	7.84438e-06	0.000131492	TIS UP
Rasal3	4147.26	0.717037	0.166438	4.30814	1.64633e-05	0.000243356	TIS UP
Slc35f6	713.51	0.715671	0.214482	3.33674	0.000847663	0.00633353	TIS UP
Ube2h	5662.73	0.715025	0.206025	3.47057	0.000519358	0.00424194	TIS UP
Pnrc1	3477.85	0.713075	0.22677	3.14448	0.00166382	0.0110802	TIS UP
Cd81	8148.6	0.713069	0.211659	3.36896	0.000754533	0.00576733	TIS UP
AC168977.1	1105.02	0.710842	0.263241	2.70035	0.00692665	0.0347286	TIS UP
Arl8a	2637.67	0.709581	0.172942	4.10299	4.07837e-05	0.000517941	TIS UP
Mdm2	4754.96	0.705953	0.2001	3.528	0.000418718	0.00355047	TIS UP
Afap1	873.096	0.705717	0.253702	2.78167	0.00540795	0.028542	TIS UP
Zswim7	168.986	0.704711	0.237108	2.97211	0.00295758	0.0176249	TIS UP
Lysmd4	212.924	0.702614	0.263545	2.66601	0.00767568	0.0374063	TIS UP
Zfhx3	413.659	0.702153	0.265781	2.64185	0.00824551	0.0394952	TIS UP
Marveld1	234.484	0.701512	0.241818	2.90099	0.00371981	0.0212477	TIS UP
Abcb1b	1614.2	0.701224	0.254071	2.75995	0.00578102	0.0302238	TIS UP
Cstb	1598.19	0.70105	0.175175	4.00199	6.28115e-05	0.000737537	TIS UP
Slc5a3	364.814	0.699286	0.260311	2.68634	0.00722391	0.0358122	TIS UP
Wdfy2	1368.85	0.697314	0.230323	3.02756	0.00246539	0.0152594	TIS UP
Zfand3	1630.46	0.697145	0.145476	4.79215	1.65001e-06	3.55659e-05	TIS UP
Gnpda1	2650	0.695471	0.219138	3.17366	0.00150529	0.0102205	TIS UP
Ormdl3	1510.6	0.694059	0.132218	5.24936	1.52627e-07	4.57386e-06	TIS UP
Tpd52	4197.4	0.693884	0.199771	3.47339	0.000513921	0.00421198	TIS UP
Bpnt1	1696.72	0.688695	0.246178	2.79755	0.00514919	0.0274537	TIS UP
Dusp16	1501.19	0.687667	0.251038	2.73929	0.00615715	0.0316344	TIS UP
Pafah2	528.342	0.687598	0.220223	3.12228	0.00179455	0.0117719	TIS UP
Ppp3cc	1418.62	0.687039	0.18466	3.72057	0.000198777	0.00190785	TIS UP
Txnrd1	5783.35	0.686628	0.235174	2.91966	0.00350413	0.0201957	TIS UP
Por	2967.28	0.686052	0.233517	2.9379	0.00330439	0.0192518	TIS UP
Rftn2	200.312	0.685869	0.266146	2.57704	0.00996504	0.0458341	TIS UP
N4bp2l1	1484.31	0.684365	0.210578	3.24994	0.00115429	0.00818493	TIS UP
Abcc1	2810.46	0.68431	0.226201	3.02523	0.00248442	0.015343	TIS UP
Pgap3	523.731	0.683737	0.208607	3.27763	0.00104681	0.00753434	TIS UP
Pdrg1	3386.56	0.68299	0.230106	2.96815	0.00299597	0.0178027	TIS UP
Plgrkt	1719.1	0.682308	0.17824	3.82802	0.000129177	0.00133603	TIS UP
Unc45a	2541.45	0.682303	0.161802	4.2169	2.47678e-05	0.000338819	TIS UP
Cnksr3	877.437	0.679236	0.26242	2.58836	0.00964354	0.0446023	TIS UP
Chrnb2	375.247	0.677248	0.260565	2.59915	0.00934548	0.0435321	TIS UP
Dedd2	1594.43	0.674155	0.167407	4.02705	5.6481e-05	0.000674614	TIS UP
Acox1	1374.03	0.673969	0.189145	3.56324	0.000366311	0.00315914	TIS UP
H2afj	4299.67	0.673408	0.17484	3.85156	0.000117367	0.00122914	TIS UP
Sp100	6595.68	0.672969	0.237057	2.83885	0.00452771	0.0248079	TIS UP
Ncoa4	5569.19	0.672932	0.19471	3.45608	0.000548095	0.00443606	TIS UP
Foxj2	895.284	0.671872	0.167695	4.00651	6.16232e-05	0.000725117	TIS UP
Arhgap25	1629.32	0.670135	0.211446	3.1693	0.00152808	0.0103374	TIS UP
Fgd3	1701.1	0.670043	0.212246	3.15692	0.00159446	0.0106909	TIS UP
Tlr6	404.476	0.669983	0.231953	2.88845	0.00387152	0.0219121	TIS UP
Pdcl	2314.27	0.66876	0.257651	2.5956	0.00944258	0.043849	TIS UP
Tagap	568.76	0.668629	0.213332	3.13422	0.00172314	0.0113797	TIS UP
Cited2	2413.74	0.66821	0.241968	2.76156	0.00575257	0.030094	TIS UP
Ctse	2025.57	0.667221	0.211314	3.15749	0.00159133	0.0106828	TIS UP
Fbxw4	1538.01	0.666863	0.225841	2.95279	0.00314912	0.0185474	TIS UP
Nr2c1	497.571	0.666458	0.230853	2.88694	0.00389003	0.0219827	TIS UP
Ppp1r9b	3316.29	0.665807	0.179632	3.7065	0.000210142	0.00199623	TIS UP
Alg3	1315.45	0.665508	0.237906	2.79735	0.0051523	0.0274537	TIS UP
Ctdsp2	10069.9	0.660904	0.213776	3.09158	0.00199095	0.0127955	TIS UP
Os9	5804.35	0.660741	0.148751	4.44192	8.91595e-06	0.000145931	TIS UP
Zfp839	962.514	0.658409	0.177669	3.70582	0.000210709	0.00200048	TIS UP
Tmem189	2267.93	0.657911	0.225819	2.91344	0.00357471	0.020542	TIS UP
Scarb2	3982.06	0.657739	0.137775	4.77401	1.80593e-06	3.81373e-05	TIS UP
Trim14	609.621	0.65639	0.233082	2.81614	0.00486047	0.0261918	TIS UP
Akap13	9524.82	0.655055	0.186955	3.50381	0.000458657	0.00384414	TIS UP
Qpctl	751.3	0.653336	0.199961	3.26732	0.00108569	0.00777387	TIS UP
Snrk	1278.04	0.65295	0.210983	3.09479	0.00196949	0.0126848	TIS UP
Micall1	1636.49	0.652122	0.226286	2.88185	0.00395347	0.0222618	TIS UP
Zc3h12a	955.877	0.651695	0.234149	2.78325	0.00538175	0.0284398	TIS UP
Cmtm6	2783.26	0.650694	0.146958	4.42776	9.5215e-06	0.000153728	TIS UP
Zfp874a	654.655	0.64903	0.255264	2.54259	0.0110035	0.0496379	TIS UP
Zbtb10	679.364	0.648674	0.202781	3.19889	0.0013796	0.00952003	TIS UP
Zfyve9	648.54	0.648652	0.233823	2.77412	0.0055352	0.0290755	TIS UP
Fam63a	818.671	0.648591	0.203575	3.18601	0.00144252	0.00986264	TIS UP
Zswim8	2893.41	0.648186	0.223169	2.90447	0.00367877	0.0210566	TIS UP
Nfe2l2	4638.12	0.647201	0.173904	3.72159	0.000197971	0.0019023	TIS UP
Atp6v0d1	3655.71	0.646954	0.193278	3.34727	0.000816119	0.00614191	TIS UP
Snx13	1462.14	0.646733	0.252219	2.56417	0.0103424	0.0473549	TIS UP
Rnf166	1353.74	0.644489	0.242214	2.66082	0.00779502	0.0378882	TIS UP
Ublcp1	1062.6	0.643924	0.214093	3.00768	0.00263246	0.0160796	TIS UP
Pdlim2	1030.33	0.64344	0.163896	3.9259	8.64056e-05	0.000961075	TIS UP
Rnf215	496.533	0.643223	0.180309	3.56733	0.000360636	0.00311828	TIS UP
Nfatc1	4179.05	0.642655	0.217921	2.94903	0.00318772	0.0187416	TIS UP
Zfp287	251.186	0.642633	0.250007	2.57046	0.0101563	0.0466181	TIS UP
Prr5	3613.66	0.641865	0.158396	4.05229	5.0718e-05	0.000618414	TIS UP
Cd79b	29157	0.641803	0.194748	3.29556	0.000982273	0.00715325	TIS UP
Pbxip1	5303.52	0.640427	0.22782	2.81111	0.00493709	0.0265275	TIS UP
Sptlc1	1601.53	0.640052	0.162897	3.92918	8.52343e-05	0.000951221	TIS UP
Cyp4f16	907.223	0.638559	0.171866	3.71544	0.000202847	0.0019402	TIS UP
Ulk1	2599.07	0.638121	0.229893	2.77573	0.00550784	0.02895	TIS UP
Gdpd5	343.318	0.637703	0.214632	2.97115	0.00296686	0.0176676	TIS UP
Fam49a	960.073	0.636903	0.250357	2.54397	0.0109599	0.0495023	TIS UP
Man2b1	6656.47	0.636108	0.207245	3.06936	0.00214519	0.0136216	TIS UP
Capg	3002.64	0.635858	0.232939	2.72973	0.0063387	0.032328	TIS UP
Stat3	5857.77	0.63557	0.228267	2.78432	0.00536399	0.0283819	TIS UP
Atp10d	1141.15	0.635089	0.242938	2.6142	0.00894374	0.0420007	TIS UP
Ccdc126	453.426	0.633908	0.231585	2.73726	0.00619536	0.0318021	TIS UP
Taf1c	1900.68	0.630253	0.158679	3.97188	7.13067e-05	0.000817134	TIS UP
Nfe2l1	7329.95	0.629943	0.213861	2.94558	0.00322355	0.0189056	TIS UP
Tgif1	3244.17	0.629649	0.168063	3.7465	0.000179319	0.00175531	TIS UP
Laptm4a	4641.91	0.629035	0.145394	4.32641	1.51557e-05	0.000227254	TIS UP
Tln1	16248.2	0.628963	0.230901	2.72396	0.00645053	0.0327579	TIS UP
Cd37	12138	0.62814	0.214313	2.93095	0.00337924	0.0196253	TIS UP
Zgpat	2291.03	0.627859	0.186511	3.36634	0.000761724	0.00581129	TIS UP
Abcc5	1566.91	0.626141	0.234142	2.67419	0.0074909	0.0367639	TIS UP
Plbd2	3144.36	0.625638	0.149282	4.19098	2.77755e-05	0.000373523	TIS UP
Etv3	2363.24	0.623197	0.207062	3.00972	0.00261491	0.0160029	TIS UP
Mavs	4065.94	0.62315	0.229741	2.7124	0.00667971	0.0336856	TIS UP
Slc10a3	1411.19	0.61988	0.224396	2.76243	0.00573721	0.030023	TIS UP
Frrs1	1183.04	0.618707	0.234611	2.63716	0.00836039	0.0398432	TIS UP
Znfx1	1872.49	0.6183	0.224875	2.74953	0.00596815	0.030897	TIS UP
2310047M10Rik	536.675	0.617919	0.207605	2.97641	0.00291641	0.0174545	TIS UP
mt-Atp6	58639.6	0.616393	0.23172	2.66008	0.00781216	0.0379477	TIS UP
Lamp2	4260.4	0.615995	0.235607	2.6145	0.00893583	0.041976	TIS UP
Whrn	2079.78	0.615859	0.220122	2.79781	0.00514506	0.0274414	TIS UP
Lyn	6031.02	0.615174	0.202595	3.03647	0.00239366	0.014866	TIS UP
Slc25a45	1522.71	0.614354	0.185193	3.31737	0.000908685	0.00669342	TIS UP
Abhd5	392.1	0.613888	0.241232	2.54481	0.0109338	0.0494379	TIS UP
Agpat1	2855.38	0.613709	0.171432	3.57991	0.000343719	0.00300948	TIS UP
Ppp1r13b	1653.09	0.613295	0.188711	3.24991	0.0011544	0.00818493	TIS UP
Fam134c	3483.26	0.613037	0.201339	3.0448	0.00232833	0.0145462	TIS UP
Atp6v1d	2905.22	0.610328	0.215119	2.83717	0.0045515	0.0249218	TIS UP
Prkd2	4547.77	0.608236	0.141074	4.31146	1.62179e-05	0.000240626	TIS UP
Prune	1210.9	0.607908	0.221616	2.74307	0.00608682	0.03136	TIS UP
Atp6v0c	9686.61	0.60724	0.229955	2.64069	0.00827373	0.0395686	TIS UP
Jak1	7679.68	0.607109	0.177942	3.41183	0.00064529	0.00509082	TIS UP
Acadvl	3781.69	0.606842	0.195038	3.1114	0.00186205	0.0121194	TIS UP
Ugdh	1043.53	0.606819	0.195879	3.09793	0.00194878	0.0125953	TIS UP
Mr1	295.89	0.606286	0.210929	2.87436	0.00404853	0.0227357	TIS UP
Stard5	457.513	0.605629	0.215868	2.80556	0.00502295	0.0269107	TIS UP
Fam222b	521.13	0.604931	0.232812	2.59836	0.00936695	0.0436077	TIS UP
Spata13	4060.02	0.602684	0.208202	2.89471	0.00379509	0.0215889	TIS UP
Abtb1	1635.6	0.601337	0.225151	2.67082	0.00756666	0.0370158	TIS UP
S100a10	7422.8	0.600252	0.152154	3.94504	7.97852e-05	0.000901275	TIS UP
Mfsd11	1176.93	0.600155	0.223213	2.68871	0.00717284	0.0356333	TIS UP
Mcfd2	1827.04	0.597984	0.150755	3.9666	7.29046e-05	0.000833725	TIS UP
Commd3	2478.98	0.597509	0.214419	2.78664	0.00532576	0.0282066	TIS UP
Tmem19	835.131	0.597363	0.234536	2.547	0.0108655	0.0491691	TIS UP
Pisd	3537.29	0.597356	0.182179	3.27895	0.00104193	0.00750569	TIS UP
Ccndbp1	1794.68	0.595371	0.18739	3.17718	0.00148716	0.010118	TIS UP
Alkbh6	837.564	0.594993	0.190828	3.11795	0.00182111	0.0119087	TIS UP
Anxa6	5349.38	0.59487	0.176721	3.36616	0.000762236	0.00581253	TIS UP
Uhrf1bp1	1652.08	0.594826	0.158513	3.75254	0.000175048	0.00171871	TIS UP
Csnk1e	4830.12	0.594447	0.207853	2.85994	0.00423719	0.0236121	TIS UP
Dnajc16	1851.51	0.594293	0.205886	2.88652	0.00389529	0.0219937	TIS UP
Vgll4	1592.92	0.593377	0.151934	3.90549	9.40351e-05	0.00102139	TIS UP
Arf3	6759.05	0.593001	0.183832	3.22577	0.00125634	0.00878436	TIS UP
2410131K14Rik	896.988	0.591655	0.165301	3.57925	0.000344576	0.0030154	TIS UP
Cdipt	3447.5	0.590346	0.179185	3.29462	0.000985535	0.00717387	TIS UP
Pcyox1	2689.24	0.586644	0.182492	3.21463	0.00130612	0.0090905	TIS UP
Rassf1	2498.36	0.586025	0.195872	2.99187	0.00277274	0.0167815	TIS UP
Tex264	1412.46	0.584781	0.218756	2.67321	0.00751282	0.0368444	TIS UP
Rabac1	2415.8	0.584564	0.226664	2.57899	0.00990902	0.0456705	TIS UP
Zfyve27	2102.59	0.583863	0.171623	3.40201	0.000668931	0.00524409	TIS UP
Atp6v1b2	4631.43	0.582998	0.150422	3.87573	0.000106304	0.00113033	TIS UP
Ggact	698.112	0.578851	0.196646	2.94362	0.00324397	0.0189853
Tmbim4	1772.84	0.577672	0.148084	3.90097	9.58063e-05	0.00103657
Tgoln1	4277.43	0.577141	0.167716	3.44117	0.000579194	0.00465847
Rela	4931.09	0.57612	0.171877	3.35194	0.000802479	0.00605841
Lysmd1	903.123	0.575822	0.188387	3.05659	0.00223868	0.0141024
Ctsc	5584.31	0.574818	0.186746	3.07808	0.00208338	0.013295
Cdc42se1	6728.2	0.574323	0.171879	3.34145	0.000833431	0.00624961
Dnajc5	5049.18	0.572562	0.188133	3.0434	0.00233922	0.0145923
Dhx40	1903.46	0.571155	0.180595	3.16262	0.00156355	0.0105218
Plekhm1	2868.33	0.566755	0.183089	3.09552	0.00196468	0.0126685
Saraf	3052.79	0.563369	0.183629	3.06797	0.00215517	0.0136641
Arhgap35	1919.42	0.563177	0.202316	2.78365	0.00537517	0.0284316
Ipo13	3308.08	0.562418	0.177812	3.16299	0.00156156	0.0105168
Car12	2414.55	0.562132	0.192269	2.92367	0.00345931	0.0199858
Rnaset2a	1109.29	0.561307	0.143817	3.90292	9.50388e-05	0.00102984
Cnppd1	6248.03	0.561211	0.177592	3.16011	0.00157711	0.0105939
Urgcp	1317.39	0.561035	0.190961	2.93795	0.0033039	0.0192518
Ramp2	424.83	0.559704	0.187894	2.97883	0.00289348	0.0173609
Mreg	1026.81	0.558201	0.164271	3.39805	0.000678691	0.0053041
Nceh1	760.659	0.557553	0.169405	3.29124	0.000997483	0.00725134
Scamp2	3607.33	0.557247	0.175765	3.1704	0.00152228	0.0103145
Inpp5k	2854.72	0.55714	0.160907	3.4625	0.000535186	0.00434565
Alg1	1912.72	0.556029	0.137312	4.04939	5.1352e-05	0.000623635
Slc17a5	709.398	0.553158	0.215781	2.56352	0.0103617	0.0474044
Tbc1d10a	953.173	0.549473	0.142857	3.84631	0.000119909	0.00125183
Ccser2	859.579	0.549243	0.190493	2.88327	0.00393573	0.0221694
Sco2	955.167	0.548457	0.193013	2.84156	0.00448934	0.0246138
Smpd1	1326.03	0.546863	0.183163	2.98566	0.00282963	0.0170597
H13	7871.8	0.542401	0.20078	2.70147	0.00690336	0.0346457
Gpsm3	2730.61	0.541643	0.146284	3.70269	0.000213329	0.00202189
Dram2	591.086	0.541594	0.196633	2.75434	0.00588113	0.0305791
Stoml1	2098.28	0.541333	0.172633	3.13575	0.00171418	0.0113295
Ighm	131061	0.541043	0.207264	2.61041	0.00904335	0.0423497
Mcl1	12845.3	0.54076	0.142584	3.79258	0.000149088	0.0015147
Rnaset2b	6504.65	0.53877	0.155467	3.46549	0.000529268	0.00430389
Hsdl2	1132.38	0.536215	0.183847	2.91664	0.00353822	0.0203777
Cd53	6305.11	0.534575	0.134809	3.96544	7.32597e-05	0.000836064
Btbd19	966.616	0.532865	0.206777	2.577	0.0099662	0.0458341
Irf2bp2	4958.07	0.532459	0.199853	2.66425	0.00771594	0.0375476
Rit1	791.182	0.532183	0.155046	3.43243	0.000598196	0.00478729
Tmem127	2266.99	0.53063	0.203374	2.60913	0.00907719	0.0424605
Ei24	3892.41	0.530386	0.199558	2.6578	0.00786519	0.0380959
Smarca2	2201.28	0.529032	0.190274	2.78037	0.00542973	0.0286389
Nol6	8707.99	0.528691	0.132327	3.99535	6.45997e-05	0.000755341
Pced1b	1279.89	0.527213	0.193903	2.71896	0.00654881	0.0331963
Ube2g2	4129.94	0.523967	0.200784	2.60961	0.00906458	0.0424253
1810058I24Rik	2464.34	0.523268	0.155735	3.35998	0.000779479	0.00591963
Cyld	3885.15	0.522583	0.188051	2.77894	0.00545374	0.0287291
Tmco3	677.657	0.522492	0.192503	2.7142	0.00664358	0.0335237
Gosr2	4850.83	0.522111	0.180921	2.88585	0.00390362	0.0220258
Gpr108	2328.35	0.521035	0.197258	2.64139	0.00825667	0.0395324
Snap29	1659.22	0.520284	0.169827	3.06361	0.00218684	0.0138334
Tom1l2	859.729	0.516538	0.197474	2.61572	0.0089039	0.0418496
Nub1	6953.48	0.51619	0.157289	3.28179	0.00103151	0.00744669
Trp53inp1	13941	0.514209	0.198276	2.5934	0.00950315	0.0440717
1110059E24Rik	2733.78	0.513559	0.192029	2.67438	0.00748673	0.0367542
[truncated: 1,627 more rows]

## Sheet: S3E - DEA, UT sh_Spi1
Supplementary Data 3E. Differentially expressed genes by knockdown of PU.1 in proliferating lymphomas
Results of DE analysis by DESeq2 encompassing control;bcl2 UT lymphomas, comparing sh_Spi1 vs sh_ctrl pairs (n = 4).
DESeq2 models count data with a negative binomial distribution. Significance testing was performed using the Wald test
"padj" is the Benjamini-Hochberg adjusted P value.
The gene symbols used for downstream analyses of gene sets are assigned in the "Gene set" column.
Related to Fig. 7a
Grey font indicates that genes had padj <0.10 but |log2FoldChange| < 0.58, i.e. not considered significant.
SYMBOL	baseMean	log2FoldChange	lfcSE	stat	pvalue	padj (<0.10)	Gene set
Cd83	49.3664	-3.27481	0.786507	-4.16374	3.13077e-05	0.00679899	sh_Spi1 UT DOWN
Col7a1	100.584	-2.73381	0.749016	-3.64988	0.000262368	0.0304632	sh_Spi1 UT DOWN
Rps15a-ps5	354.747	-2.3791	0.672838	-3.53592	0.000406359	0.0400452	sh_Spi1 UT DOWN
Mpeg1	574.615	-2.21689	0.486031	-4.56122	5.08578e-06	0.00177703	sh_Spi1 UT DOWN
Adat3	576.278	-2.07971	0.45753	-4.54552	5.4799e-06	0.00183608	sh_Spi1 UT DOWN
Faim3	279.372	-2.01929	0.516187	-3.91194	9.15576e-05	0.0149124	sh_Spi1 UT DOWN
Lhx2	316.346	-2.01337	0.596335	-3.37625	0.000734823	0.0565506	sh_Spi1 UT DOWN
Plek	313.219	-1.9087	0.59025	-3.23372	0.0012219	0.0774553	sh_Spi1 UT DOWN
Col27a1	383.594	-1.90586	0.537324	-3.54696	0.000389711	0.0393977	sh_Spi1 UT DOWN
Ncf1	175.459	-1.79481	0.53262	-3.36978	0.000752272	0.0565506	sh_Spi1 UT DOWN
Apof	118.967	-1.76241	0.362875	-4.85679	1.19305e-06	0.000560722	sh_Spi1 UT DOWN
Ctsh	1398.93	-1.70908	0.282075	-6.05896	1.37002e-09	2.00828e-06	sh_Spi1 UT DOWN
Smim3	113.949	-1.65116	0.523281	-3.1554	0.00160279	0.0908017	sh_Spi1 UT DOWN
Lrrk2	392.217	-1.62177	0.288764	-5.61624	1.95162e-08	1.76051e-05	sh_Spi1 UT DOWN
Gas7	781.644	-1.34615	0.282958	-4.75741	1.9609e-06	0.000766517	sh_Spi1 UT DOWN
Cd40	269.193	-1.32056	0.363082	-3.63709	0.000275731	0.031701	sh_Spi1 UT DOWN
Iqsec2	148.015	-1.26958	0.386581	-3.28411	0.00102304	0.0702473	sh_Spi1 UT DOWN
Hsd17b13	102.533	-1.23442	0.364089	-3.39044	0.000697815	0.0555311	sh_Spi1 UT DOWN
Lacc1	276.859	-1.22161	0.352756	-3.46305	0.000534095	0.0460539	sh_Spi1 UT DOWN
H2-Aa	5393.22	-1.20392	0.35323	-3.40833	0.000653615	0.0528616	sh_Spi1 UT DOWN
Cd74	34223.7	-1.17914	0.3371	-3.49789	0.000468951	0.044631	sh_Spi1 UT DOWN
Nt5e	324.901	-1.16429	0.3113	-3.74009	0.000183956	0.0239695	sh_Spi1 UT DOWN
AC168977.1	671.208	-1.16234	0.335325	-3.46632	0.000527636	0.0460539	sh_Spi1 UT DOWN
Tdrd7	526.578	-1.12698	0.274081	-4.11187	3.92467e-05	0.00793528	sh_Spi1 UT DOWN
Il10ra	654.21	-1.12378	0.242145	-4.64092	3.4686e-06	0.00131214	sh_Spi1 UT DOWN
Tyrobp	261.179	-1.09483	0.341681	-3.20423	0.00135425	0.0814423	sh_Spi1 UT DOWN
Dock10	879.914	-1.07572	0.317749	-3.38545	0.000710619	0.0559291	sh_Spi1 UT DOWN
Ppm1e	479.061	-1.05994	0.270364	-3.92043	8.83928e-05	0.0148083	sh_Spi1 UT DOWN
Gm4737	1997.49	-1.05057	0.325414	-3.22841	0.00124478	0.0779554	sh_Spi1 UT DOWN
Pld4	2057.2	-1.04785	0.136501	-7.67654	1.63449e-14	6.38921e-11	sh_Spi1 UT DOWN
C130026I21Rik	1110.94	-0.997693	0.27485	-3.62996	0.00028347	0.0322053	sh_Spi1 UT DOWN
Zbed6	301.646	-0.955295	0.196424	-4.86344	1.15362e-06	0.000560722	sh_Spi1 UT DOWN
Cd2	1621.02	-0.953562	0.252427	-3.77757	0.000158363	0.0212556	sh_Spi1 UT DOWN
Gm13092	344.328	-0.947628	0.231826	-4.08768	4.35716e-05	0.0086604	sh_Spi1 UT DOWN
Pmaip1	1816.5	-0.945735	0.293044	-3.22728	0.00124973	0.0779554	sh_Spi1 UT DOWN
Scin	280.24	-0.939165	0.24126	-3.89276	9.91118e-05	0.0154971	sh_Spi1 UT DOWN
Fanca	2157.42	-0.921369	0.243319	-3.78667	0.000152677	0.0208191	sh_Spi1 UT DOWN
Spi1	2740.01	-0.917372	0.13606	-6.74241	1.5578e-11	3.65367e-08	sh_Spi1 UT DOWN
Col11a2	971.537	-0.91667	0.226523	-4.0467	5.19442e-05	0.00982499	sh_Spi1 UT DOWN
Capg	2026.37	-0.906734	0.238783	-3.79731	0.000146274	0.0204209	sh_Spi1 UT DOWN
Gm12411	1639.94	-0.873102	0.132613	-6.58382	4.58522e-11	7.68155e-08	sh_Spi1 UT DOWN
Dtx3	364.814	-0.869272	0.248746	-3.49462	0.000474739	0.044631	sh_Spi1 UT DOWN
Siglecg	2841.79	-0.86249	0.19411	-4.44331	8.85841e-06	0.00253372	sh_Spi1 UT DOWN
Zfp354c	259.3	-0.846982	0.251874	-3.36272	0.000771795	0.0572838	sh_Spi1 UT DOWN
Cd209c	151.219	-0.844945	0.220349	-3.83457	0.000125785	0.0186719	sh_Spi1 UT DOWN
Prkcb	899.626	-0.797768	0.176955	-4.5083	6.53479e-06	0.00201667	sh_Spi1 UT DOWN
Cd86	373.789	-0.787303	0.220545	-3.56981	0.00035724	0.0367964	sh_Spi1 UT DOWN
Golm1	980.222	-0.778299	0.245181	-3.17438	0.00150156	0.0876061	sh_Spi1 UT DOWN
Naip5	355.811	-0.775889	0.200179	-3.87597	0.000106201	0.0163871	sh_Spi1 UT DOWN
Limk1	1041.74	-0.77284	0.18784	-4.11435	3.88264e-05	0.00793528	sh_Spi1 UT DOWN
Haao	767.566	-0.772014	0.154277	-5.00409	5.61275e-07	0.000329103	sh_Spi1 UT DOWN
Adam19	2377.22	-0.749517	0.196759	-3.80932	0.000139351	0.020175	sh_Spi1 UT DOWN
Flot1	525.944	-0.744545	0.208587	-3.56947	0.000357704	0.0367964	sh_Spi1 UT DOWN
Zfp385a	1566.53	-0.734445	0.202437	-3.62801	0.00028561	0.0322053	sh_Spi1 UT DOWN
Sla	1414.76	-0.698329	0.223143	-3.12951	0.00175098	0.0946257	sh_Spi1 UT DOWN
Gsdmd	981.874	-0.688762	0.216653	-3.1791	0.00147735	0.0866245	sh_Spi1 UT DOWN
Sh3bp1	706.609	-0.674969	0.190519	-3.54279	0.000395922	0.0396836	sh_Spi1 UT DOWN
Fstl1	2720.38	-0.672793	0.204749	-3.28594	0.00101643	0.0702473	sh_Spi1 UT DOWN
Lpxn	1712.67	-0.616885	0.16245	-3.79739	0.000146225	0.0204209	sh_Spi1 UT DOWN
Tmsb4x	12758.1	-0.600751	0.102383	-5.86767	4.41964e-09	4.31909e-06	sh_Spi1 UT DOWN
Rnf11	573.258	-0.587189	0.114966	-5.10748	3.26487e-07	0.000212741	sh_Spi1 UT DOWN
Dennd1a	2889.82	-0.586078	0.14015	-4.18178	2.8923e-05	0.00639961	sh_Spi1 UT DOWN
Gpr155	1166.77	-0.582962	0.176472	-3.30342	0.00095512	0.067474	sh_Spi1 UT DOWN
Znf512b	1593.69	-0.578779	0.109677	-5.2771	1.31243e-07	9.61928e-05
Arhgap33	1184.74	-0.569317	0.129016	-4.41274	1.02069e-05	0.00278363
Bfsp2	882.647	-0.554625	0.157064	-3.5312	0.000413681	0.0400929
Slc25a23	2080	-0.543796	0.143141	-3.79904	0.00014526	0.0204209
Gm20605	841.187	-0.513682	0.133543	-3.84656	0.000119786	0.0181258
1700021K19Rik	2371.48	-0.513491	0.113692	-4.51652	6.28638e-06	0.00199244
Trex1	1243.69	-0.509324	0.146744	-3.47084	0.000518835	0.0457472
Rtel1	2511.96	-0.504104	0.15464	-3.25985	0.00111469	0.0734383
Ogfod1	1536.53	-0.503248	0.118794	-4.23632	2.27209e-05	0.00543773
Ptprc	7666.55	-0.495736	0.142686	-3.47432	0.000512152	0.0455
Cenpi	1620.08	-0.491273	0.136195	-3.60713	0.000309597	0.0340916
Phka2	2273.71	-0.479127	0.0809942	-5.91556	3.30739e-09	3.52598e-06
Lyn	3521.12	-0.475427	0.0791586	-6.00601	1.9015e-09	2.47765e-06
Rp2h	1078.8	-0.464383	0.114163	-4.06771	4.74768e-05	0.00927935
Cep83	2860.11	-0.463941	0.093065	-4.98513	6.19199e-07	0.000345779
Pik3ap1	4288.31	-0.458149	0.128864	-3.55528	0.000377579	0.0385032
Gfod1	2165.87	-0.440086	0.140619	-3.12963	0.00175027	0.0946257
Gpx1	18588	-0.435908	0.09448	-4.61376	3.95442e-06	0.00144917
Lmf2	3178.26	-0.429291	0.136017	-3.15615	0.00159864	0.0908017
Tep1	4554.81	-0.405208	0.123427	-3.28299	0.00102714	0.0702473
Dusp5	2498.99	-0.396986	0.0914013	-4.34333	1.40341e-05	0.00365728
Mkl1	1614.07	-0.390606	0.0997284	-3.9167	8.97704e-05	0.0148273
Mapk8ip3	2968.08	-0.37798	0.0858767	-4.40142	1.07543e-05	0.00286627
Stk38	3315.16	-0.373887	0.101853	-3.67085	0.000241746	0.0283496
Vim	16933.8	-0.371267	0.0814451	-4.5585	5.15213e-06	0.00177703
Idua	687.127	-0.364157	0.115745	-3.1462	0.00165406	0.0929269
Lmbrd2	786.425	-0.357978	0.111169	-3.22013	0.00128132	0.0786707
Cxcr4	6290.48	-0.346991	0.0714501	-4.8564	1.19537e-06	0.000560722
Tcirg1	2933.35	-0.344478	0.0990907	-3.47639	0.00050821	0.0454945
E2f8	2997.46	-0.344456	0.110062	-3.12966	0.00175009	0.0946257
Birc3	2355.49	-0.326034	0.100506	-3.24391	0.00117901	0.0751426
Ccnd3	5797.4	-0.324584	0.0848512	-3.82533	0.000130595	0.0191436
B230219D22Rik	2955.43	-0.31922	0.0711101	-4.48909	7.15271e-06	0.00215076
Atg16l1	1791.34	-0.308146	0.0872068	-3.53351	0.000410076	0.0400747
Osbpl8	3040.33	-0.304245	0.0909719	-3.34439	0.000824643	0.0604411
Pkmyt1	1782.72	-0.300758	0.0924456	-3.25335	0.00114054	0.074306
Rhog	2988.75	-0.288462	0.072175	-3.99671	6.42293e-05	0.0114124
Plagl2	2304.64	-0.282591	0.0880802	-3.20834	0.00133505	0.0811198
Morc2a	4334.28	-0.278994	0.0686587	-4.06349	4.83453e-05	0.00929418
Ppif	3768.11	-0.273275	0.078532	-3.47979	0.000501802	0.0452664
Rcc1	8568.96	-0.268834	0.0822178	-3.26978	0.0010763	0.0717143
Fmnl1	10887.9	-0.264401	0.0806604	-3.27796	0.00104561	0.0702473
Kif18b	3660.36	-0.264099	0.0812547	-3.25026	0.00115301	0.0743459
Rnf115	2377.79	-0.263265	0.0733436	-3.58947	0.000331349	0.035488
Coro1a	27155.3	-0.246512	0.0721423	-3.41703	0.00063309	0.0520822
Btk	9968.66	-0.242302	0.0770233	-3.14583	0.00165616	0.0929269
Arpc4	7093.65	-0.198618	0.0578382	-3.43403	0.000594675	0.0501709
Arpc2	13585.2	-0.190374	0.0564491	-3.37249	0.000744926	0.0565506
Hnrnpa3	61946	0.179548	0.05528	3.24798	0.00116229	0.0744816
Csnk1a1	11442.6	0.205393	0.0653341	3.14374	0.00166802	0.0931473
Rps23	106183	0.229591	0.0710494	3.23143	0.00123174	0.077659
Cdc42	12623.9	0.250745	0.0781441	3.20875	0.00133311	0.0811198
Rpl13	108618	0.258655	0.0756175	3.42056	0.000624912	0.0520822
Setd3	5373.9	0.290227	0.0805403	3.6035	0.000313967	0.0340916
Wdr6	7822.33	0.294516	0.087287	3.37411	0.00074054	0.0565506
Usp46	1027.39	0.319909	0.0958526	3.33751	0.000845332	0.0615727
Setd1b	2668.67	0.32255	0.0925067	3.48677	0.000488887	0.0449957
Otud7b	2844.13	0.325932	0.0994533	3.27724	0.00104829	0.0702473
Ube2d3	13439.3	0.32673	0.0767179	4.25885	2.05483e-05	0.0050202
Zfp592	3941.58	0.326866	0.085011	3.84498	0.000120561	0.0181258
Traf4	3235.11	0.336312	0.105169	3.19783	0.00138468	0.0828475
Uhrf1bp1	1701.79	0.345791	0.0818857	4.22285	2.41229e-05	0.00554684
Nanp	875.703	0.358219	0.114275	3.1347	0.00172031	0.0942713
Sco1	875.146	0.36298	0.0961335	3.77579	0.000159503	0.0212556
Zmiz1	7514.63	0.364708	0.0714072	5.10745	3.26541e-07	0.000212741
Wnk1	10108.7	0.371699	0.0819668	4.53475	5.76724e-06	0.00187868
H6pd	2305.7	0.403104	0.121602	3.31493	0.000916651	0.0651489
Ugcg	2699.13	0.40365	0.109887	3.67331	0.000239429	0.0283496
Cd93	6383.55	0.408051	0.109698	3.71976	0.000199415	0.0248167
Zfp407	1656.64	0.412988	0.117278	3.52143	0.000429224	0.0412583
Tars2	4926.8	0.413938	0.110791	3.73621	0.000186815	0.0240745
Nelfb	4362.76	0.426211	0.133888	3.18334	0.00145585	0.0862259
Rpp38	581.377	0.431656	0.131699	3.2776	0.00104693	0.0702473
Cct7	23954.5	0.450965	0.109291	4.12627	3.68687e-05	0.00772071
Slamf7	8873.86	0.461023	0.144896	3.18174	0.00146392	0.0862684
Mgarp	1342.05	0.468528	0.125965	3.71951	0.000199609	0.0248167
Nudt16	695.316	0.472081	0.143944	3.27962	0.00103947	0.0702473
Polr1a	9665.77	0.474299	0.132268	3.58591	0.000335906	0.035488
Zhx2	1479.78	0.518445	0.0939934	5.51576	3.4728e-08	2.90897e-05
Ikzf5	1488.45	0.521728	0.123543	4.22306	2.41004e-05	0.00554684
Snx10	1180.32	0.523852	0.160537	3.26312	0.00110195	0.0730087
Agpat9	2013.48	0.536821	0.164892	3.25559	0.00113158	0.0741345
Sphk2	1989.9	0.537753	0.157414	3.41617	0.000635094	0.0520822
Gm20390	9978.37	0.543126	0.161167	3.36995	0.000751823	0.0565506
Camk2b	582.364	0.551812	0.171229	3.22265	0.00127011	0.0783925
Rrm2b	1876.82	0.564489	0.165847	3.40368	0.000664851	0.0534021
Mex3a	1328.54	0.574057	0.154412	3.71771	0.000201039	0.0248167
Tceanc2	1520.02	0.578398	0.137449	4.20807	2.57556e-05	0.00580837
Snrk	1276.06	0.581168	0.177165	3.28038	0.00103668	0.0702473	sh_Spi1 UT UP
Smtnl2	643.432	0.585302	0.186566	3.13724	0.00170548	0.0942002	sh_Spi1 UT UP
Tvp23b	688.791	0.588428	0.176612	3.33175	0.000863015	0.0624727	sh_Spi1 UT UP
Srr	455.959	0.597752	0.189281	3.15802	0.00158845	0.0908017	sh_Spi1 UT UP
Tbxa2r	545.989	0.615934	0.143162	4.30236	1.68989e-05	0.00421645	sh_Spi1 UT UP
Tspan13	7920.54	0.623468	0.183954	3.38926	0.000700828	0.0555311	sh_Spi1 UT UP
Smagp	340.026	0.624118	0.182505	3.41973	0.00062684	0.0520822	sh_Spi1 UT UP
Atxn1l	2429.87	0.62717	0.186774	3.35792	0.000785323	0.0579213	sh_Spi1 UT UP
Dnajc28	190.236	0.6378	0.191902	3.32357	0.000888718	0.0639386	sh_Spi1 UT UP
Svil	3316.83	0.64212	0.204738	3.13629	0.00171098	0.0942002	sh_Spi1 UT UP
Mr1	260.148	0.645846	0.172114	3.75243	0.000175127	0.0230755	sh_Spi1 UT UP
Asph	3862.98	0.660832	0.166255	3.9748	7.04379e-05	0.0121474	sh_Spi1 UT UP
Nudt2	566.617	0.662413	0.187185	3.53882	0.000401927	0.039944	sh_Spi1 UT UP
Nedd9	4252.02	0.673438	0.0805214	8.36346	6.09042e-17	3.57112e-13	sh_Spi1 UT UP
Pcyox1l	420.303	0.680304	0.182759	3.72241	0.000197328	0.0248167	sh_Spi1 UT UP
Iffo2	350.445	0.695956	0.183736	3.7878	0.000151988	0.0208191	sh_Spi1 UT UP
Engase	794.338	0.701685	0.217609	3.22452	0.00126184	0.0782943	sh_Spi1 UT UP
Zfp276	935.019	0.742805	0.234455	3.16822	0.00153374	0.0881672	sh_Spi1 UT UP
Stc2	1948.2	0.764306	0.17683	4.32227	1.54434e-05	0.00393705	sh_Spi1 UT UP
Lsm5	1187.06	0.775276	0.159238	4.86867	1.12352e-06	0.000560722	sh_Spi1 UT UP
Rgcc	929.009	0.776412	0.247225	3.14051	0.00168657	0.0937363	sh_Spi1 UT UP
Mrpl18	4485.54	0.780624	0.195262	3.99783	6.39263e-05	0.0114124	sh_Spi1 UT UP
Rapgef3	2080.19	0.780824	0.235068	3.32169	0.000894726	0.0639784	sh_Spi1 UT UP
Arsi	1205.17	0.784453	0.247429	3.17041	0.00152222	0.0879362	sh_Spi1 UT UP
Mt2	976.325	0.79663	0.228552	3.48555	0.000491127	0.0449957	sh_Spi1 UT UP
H1f0	2983.99	0.799959	0.250606	3.1921	0.00141242	0.0840782	sh_Spi1 UT UP
Ndrg1	1435.36	0.868843	0.181625	4.78371	1.72093e-06	0.000695907	sh_Spi1 UT UP
Lat	272.092	0.870546	0.216758	4.01621	5.9141e-05	0.0108367	sh_Spi1 UT UP
Myo10	246.375	0.888851	0.220843	4.02481	5.70208e-05	0.010614	sh_Spi1 UT UP
Rab25	188.862	0.907307	0.203645	4.45533	8.37626e-06	0.00245571	sh_Spi1 UT UP
Snap47	727.821	0.915266	0.207384	4.41339	1.01763e-05	0.00278363	sh_Spi1 UT UP
Endou	4461.11	0.9266	0.26811	3.45605	0.000548162	0.0469219	sh_Spi1 UT UP
Spint2	800.302	0.926761	0.266191	3.48156	0.0004985	0.0452664	sh_Spi1 UT UP
Taf4a	2081.88	0.982237	0.251794	3.90096	9.58136e-05	0.0151839	sh_Spi1 UT UP
Ppt2	519.684	0.983255	0.27411	3.58708	0.000334397	0.035488	sh_Spi1 UT UP
Lck	420.889	0.986029	0.193803	5.0878	3.62247e-07	0.000223582	sh_Spi1 UT UP
Zap70	477.912	1.0119	0.21052	4.80669	1.5345e-06	0.000642683	sh_Spi1 UT UP
Pgk1-rs7	7493.45	1.01315	0.243592	4.15922	3.19342e-05	0.00680894	sh_Spi1 UT UP
Lzts2	950.841	1.02381	0.295589	3.46362	0.000532961	0.0460539	sh_Spi1 UT UP
Aldoc	736.08	1.04483	0.2157	4.84391	1.27309e-06	0.000574213	sh_Spi1 UT UP
Dkkl1	86.1938	1.0844	0.310453	3.49297	0.000477684	0.044631	sh_Spi1 UT UP
Celsr1	693.322	1.25522	0.233564	5.3742	7.69231e-08	6.01385e-05	sh_Spi1 UT UP
Coro1c	7386.04	1.25777	0.348953	3.60441	0.000312862	0.0340916	sh_Spi1 UT UP
Pex12	719.582	1.30253	0.351788	3.7026	0.000213398	0.0257992	sh_Spi1 UT UP
Wnk2	247.274	1.32909	0.408943	3.25005	0.00115383	0.0743459	sh_Spi1 UT UP
Gga3	3603.69	1.33107	0.394897	3.37068	0.000749821	0.0565506	sh_Spi1 UT UP
Slc37a1	774.202	1.47279	0.370458	3.97558	7.02067e-05	0.0121474	sh_Spi1 UT UP
Cic	9302.7	1.47446	0.371455	3.96943	7.20437e-05	0.0122443	sh_Spi1 UT UP
2610015P09Rik	1220.17	1.52763	0.391597	3.90104	9.57818e-05	0.0151839	sh_Spi1 UT UP
Elfn2	244.594	1.58014	0.441697	3.57743	0.000346992	0.0363319	sh_Spi1 UT UP
Kcnf1	1615.32	1.65018	0.484139	3.40849	0.000653241	0.0528616	sh_Spi1 UT UP
Sertad4	345.798	1.6562	0.492125	3.36541	0.000764293	0.0570883	sh_Spi1 UT UP
Uaca	179.142	1.67982	0.481058	3.49193	0.000479535	0.044631	sh_Spi1 UT UP
Crlf1	348.526	1.73278	0.471541	3.67472	0.000238113	0.0283496	sh_Spi1 UT UP
Lamb2	1605.07	1.7876	0.520112	3.43694	0.000588317	0.0499942	sh_Spi1 UT UP
Prss23	432.273	1.95002	0.403971	4.82712	1.38522e-06	0.000601649	sh_Spi1 UT UP
Sidt2	7253.72	1.98272	0.158882	12.4792	9.69161e-36	1.13653e-31	sh_Spi1 UT UP
Sh2d2a	342.761	2.06479	0.291796	7.07616	1.48208e-12	4.34508e-09	sh_Spi1 UT UP
March8	1327.05	2.11928	0.354458	5.97893	2.24605e-09	2.63394e-06	sh_Spi1 UT UP
Igkv6-23	45.4189	2.15522	0.672563	3.20449	0.00135301	0.0814423	sh_Spi1 UT UP
Itga2b	49.6361	2.64779	0.714816	3.70416	0.000212089	0.0257992	sh_Spi1 UT UP
Amotl2	68.5156	2.76107	0.761746	3.62466	0.000289342	0.0323154	sh_Spi1 UT UP
Hist1h2ai	41.991	4.67586	1.41917	3.29479	0.000984958	0.0691653	sh_Spi1 UT UP
Gm9923	58.1471	10.6023	3.34308	3.17143	0.00151692	0.0879362	sh_Spi1 UT UP

## Sheet: S3F - DEA, Suv- UT sh_Spi1
Supplementary Data 3F. Differentially expressed genes by knockdown of PU.1 in proliferating Suv39h1-;bcl2 lymphomas
Results of DE analysis by DESeq2 encompassing Suv39h1-;bcl2 UT lymphomas, comparing sh_Spi1 vs sh_ctrl pairs (n = 2).
DESeq2 models count data with a negative binomial distribution. Significance testing was performed using the Wald test
"padj" is the Benjamini-Hochberg adjusted P value.
The gene symbols used for downstream analyses of gene sets are assigned in the "Gene set" column.
Related to Fig. 7a
SYMBOL	baseMean	log2FoldChange	lfcSE	stat	pvalue	padj (<0.10)	Gene set
Gm9755	50.9364	-8.15094	1.91993	-4.24543	2.18175e-05	0.00293692	sh_Spi1 Suv39h1- UT DOWN
Aldh8a1	141.772	-6.23883	1.30759	-4.77124	1.831e-06	0.000402755	sh_Spi1 Suv39h1- UT DOWN
RP24-374C7.1	45.6475	-4.99627	1.62855	-3.06793	0.00215548	0.0972032	sh_Spi1 Suv39h1- UT DOWN
Rbpsuh-rs3	87.9124	-4.99474	1.47387	-3.38885	0.000701863	0.0439998	sh_Spi1 Suv39h1- UT DOWN
Gm21985	54.814	-4.95229	1.54915	-3.19679	0.00138968	0.0705417	sh_Spi1 Suv39h1- UT DOWN
Col1a2	46.4986	-4.74964	1.49435	-3.17841	0.00148087	0.0742684	sh_Spi1 Suv39h1- UT DOWN
Amd-ps3	94.5833	-4.74867	1.24982	-3.79949	0.000144996	0.0124169	sh_Spi1 Suv39h1- UT DOWN
Crygn	26.832	-4.56727	1.47466	-3.09717	0.00195378	0.0907278	sh_Spi1 Suv39h1- UT DOWN
Gng11	108.863	-4.49853	1.15671	-3.88906	0.000100632	0.00927739	sh_Spi1 Suv39h1- UT DOWN
Ccr6	85.8065	-4.32569	0.884983	-4.88788	1.01929e-06	0.000250585	sh_Spi1 Suv39h1- UT DOWN
Sgk3	78.8068	-4.09854	1.24392	-3.29485	0.00098473	0.0551185	sh_Spi1 Suv39h1- UT DOWN
Socs3	584.026	-4.06724	0.725663	-5.60486	2.08425e-08	8.42977e-06	sh_Spi1 Suv39h1- UT DOWN
Ly6c2	148.512	-3.60123	1.02048	-3.52897	0.000417184	0.0295517	sh_Spi1 Suv39h1- UT DOWN
Fstl5	91.4855	-3.44266	1.11839	-3.07823	0.00208232	0.0945946	sh_Spi1 Suv39h1- UT DOWN
Elfn2	82.6355	-3.40701	1.01211	-3.36627	0.000761934	0.0461504	sh_Spi1 Suv39h1- UT DOWN
Gm10012	189.175	-3.35521	0.729914	-4.59672	4.29197e-06	0.000867947	sh_Spi1 Suv39h1- UT DOWN
Gpr171	989.769	-3.34211	0.334575	-9.98912	1.70085e-23	1.06626e-19	sh_Spi1 Suv39h1- UT DOWN
Pik3r5	294.105	-3.31784	1.08483	-3.0584	0.00222519	0.0989342	sh_Spi1 Suv39h1- UT DOWN
Gm2223	1225.23	-3.00327	0.513444	-5.84927	4.93745e-09	2.8139e-06	sh_Spi1 Suv39h1- UT DOWN
Orc1	1418.05	-2.94718	0.283483	-10.3963	2.5764e-25	3.23029e-21	sh_Spi1 Suv39h1- UT DOWN
Hepacam2	145.392	-2.87831	0.786755	-3.65846	0.000253737	0.0198834	sh_Spi1 Suv39h1- UT DOWN
Gm9770	85.3655	-2.78582	0.859558	-3.24098	0.00119118	0.0631293	sh_Spi1 Suv39h1- UT DOWN
Nt5e	125.011	-2.62377	0.759689	-3.45375	0.000552858	0.0366758	sh_Spi1 Suv39h1- UT DOWN
Ubash3b	184.978	-2.6011	0.59682	-4.35827	1.31096e-05	0.00196278	sh_Spi1 Suv39h1- UT DOWN
Pou2f2	937.187	-2.59898	0.354789	-7.32543	2.38137e-13	3.68728e-10	sh_Spi1 Suv39h1- UT DOWN
Cybb	780.243	-2.57113	0.405812	-6.33579	2.36136e-10	1.74157e-07	sh_Spi1 Suv39h1- UT DOWN
Cyth4	1810.59	-2.42846	0.438842	-5.5338	3.13368e-08	1.15559e-05	sh_Spi1 Suv39h1- UT DOWN
Kmo	182.869	-2.38393	0.595165	-4.00551	6.18851e-05	0.00671139	sh_Spi1 Suv39h1- UT DOWN
Xkrx	270.025	-2.33756	0.577644	-4.04671	5.19431e-05	0.00576338	sh_Spi1 Suv39h1- UT DOWN
Foxn3	3212.98	-2.30651	0.440302	-5.23847	1.6191e-07	4.84494e-05	sh_Spi1 Suv39h1- UT DOWN
Sell	2395.73	-2.27648	0.422237	-5.39148	6.98788e-08	2.36795e-05	sh_Spi1 Suv39h1- UT DOWN
Slc37a1	428.038	-2.27078	0.572331	-3.9676	7.2601e-05	0.00754017	sh_Spi1 Suv39h1- UT DOWN
Rnase12	304.784	-2.25837	0.475287	-4.7516	2.01815e-06	0.000436268	sh_Spi1 Suv39h1- UT DOWN
Dock8	1429.51	-2.25438	0.481065	-4.68622	2.78291e-06	0.000591391	sh_Spi1 Suv39h1- UT DOWN
Spata6	744.796	-2.21179	0.644507	-3.43175	0.000599697	0.0393665	sh_Spi1 Suv39h1- UT DOWN
Gm6264	752.15	-2.18238	0.421131	-5.18218	2.19308e-07	6.1104e-05	sh_Spi1 Suv39h1- UT DOWN
Cd2	1854.78	-2.1399	0.373749	-5.72549	1.03137e-08	4.61835e-06	sh_Spi1 Suv39h1- UT DOWN
Nfkbiz	947.479	-2.1338	0.633669	-3.36737	0.000758883	0.0461504	sh_Spi1 Suv39h1- UT DOWN
Aldh16a1	2475.16	-2.07949	0.28655	-7.257	3.95768e-13	4.51104e-10	sh_Spi1 Suv39h1- UT DOWN
Msrb3	2619.05	-2.07618	0.286623	-7.24359	4.36952e-13	4.56542e-10	sh_Spi1 Suv39h1- UT DOWN
Gm2427	709.832	-2.07152	0.49035	-4.22457	2.39402e-05	0.00309445	sh_Spi1 Suv39h1- UT DOWN
Dclk2	449.728	-2.07133	0.456194	-4.54047	5.61295e-06	0.000977433	sh_Spi1 Suv39h1- UT DOWN
Dock10	365.072	-2.02928	0.559189	-3.62897	0.00028455	0.0218876	sh_Spi1 Suv39h1- UT DOWN
Caskin2	232.916	-2.02656	0.647051	-3.13199	0.00173624	0.0831886	sh_Spi1 Suv39h1- UT DOWN
Cacna1d	164.441	-1.99117	0.614697	-3.23928	0.00119834	0.0631293	sh_Spi1 Suv39h1- UT DOWN
Grap	2765.88	-1.94945	0.429711	-4.53666	5.71512e-06	0.000979847	sh_Spi1 Suv39h1- UT DOWN
Gm1966	306.823	-1.94211	0.477936	-4.06353	4.83352e-05	0.00550307	sh_Spi1 Suv39h1- UT DOWN
Itgb3	745.896	-1.92563	0.423511	-4.54682	5.44617e-06	0.000961747	sh_Spi1 Suv39h1- UT DOWN
Myo1e	662.248	-1.92143	0.447589	-4.29285	1.76392e-05	0.00248495	sh_Spi1 Suv39h1- UT DOWN
Nlrc5	317.241	-1.89067	0.603789	-3.13135	0.00174006	0.0831886	sh_Spi1 Suv39h1- UT DOWN
Csf1	1186.33	-1.84408	0.381929	-4.82835	1.3767e-06	0.00031965	sh_Spi1 Suv39h1- UT DOWN
Cdh17	529.691	-1.78608	0.451872	-3.95263	7.72966e-05	0.00781569	sh_Spi1 Suv39h1- UT DOWN
Zfp940	1187.16	-1.76419	0.30423	-5.79886	6.67679e-09	3.46067e-06	sh_Spi1 Suv39h1- UT DOWN
P2rx7	294.66	-1.7519	0.473771	-3.69777	0.000217506	0.0174813	sh_Spi1 Suv39h1- UT DOWN
Arap2	2613.42	-1.75163	0.360464	-4.85938	1.17751e-06	0.000283916	sh_Spi1 Suv39h1- UT DOWN
Plek	1226.41	-1.72284	0.513632	-3.35423	0.000795866	0.0470687	sh_Spi1 Suv39h1- UT DOWN
Cd83	1137.07	-1.71223	0.314607	-5.44245	5.25526e-08	1.83029e-05	sh_Spi1 Suv39h1- UT DOWN
Cd244	674.232	-1.67675	0.479306	-3.49829	0.000468254	0.0326165	sh_Spi1 Suv39h1- UT DOWN
Pkd1	1910.84	-1.66187	0.366522	-4.53417	5.78311e-06	0.000979847	sh_Spi1 Suv39h1- UT DOWN
Il10ra	950.242	-1.65534	0.410599	-4.03153	5.5416e-05	0.00609479	sh_Spi1 Suv39h1- UT DOWN
Gpr183	815.92	-1.6513	0.355783	-4.6413	3.46222e-06	0.000723488	sh_Spi1 Suv39h1- UT DOWN
AB124611	572.289	-1.64532	0.411261	-4.00067	6.31635e-05	0.00671139	sh_Spi1 Suv39h1- UT DOWN
Rnase10	357.191	-1.6437	0.505719	-3.25023	0.00115311	0.0625872	sh_Spi1 Suv39h1- UT DOWN
2610020H08Rik	271.954	-1.61774	0.493107	-3.2807	0.00103549	0.056694	sh_Spi1 Suv39h1- UT DOWN
Dcun1d3	353.136	-1.61387	0.443426	-3.63954	0.000273125	0.0212698	sh_Spi1 Suv39h1- UT DOWN
Rab30	312.057	-1.57205	0.513067	-3.06403	0.00218375	0.0977853	sh_Spi1 Suv39h1- UT DOWN
Ppm1l	1385.55	-1.56191	0.30937	-5.04868	4.44874e-07	0.000121257	sh_Spi1 Suv39h1- UT DOWN
Lrrfip1	2880.48	-1.54895	0.380807	-4.06756	4.7508e-05	0.00546472	sh_Spi1 Suv39h1- UT DOWN
Ece1	1919.65	-1.51184	0.483474	-3.12703	0.00176583	0.0838638	sh_Spi1 Suv39h1- UT DOWN
Zfp365	656.59	-1.49018	0.361284	-4.12468	3.71248e-05	0.00439124	sh_Spi1 Suv39h1- UT DOWN
Man1a	1331.87	-1.48179	0.310096	-4.77849	1.76613e-06	0.000395424	sh_Spi1 Suv39h1- UT DOWN
Ap1s3	1168.87	-1.47464	0.341954	-4.31239	1.615e-05	0.00232746	sh_Spi1 Suv39h1- UT DOWN
Bet1l	870.731	-1.46448	0.321392	-4.55667	5.19713e-06	0.000931769	sh_Spi1 Suv39h1- UT DOWN
Polg	3844.04	-1.44134	0.231826	-6.21734	5.05658e-10	3.33681e-07	sh_Spi1 Suv39h1- UT DOWN
Map9	911.377	-1.42213	0.325053	-4.37506	1.21399e-05	0.00190262	sh_Spi1 Suv39h1- UT DOWN
Pim2	4265.25	-1.42099	0.246877	-5.75588	8.61909e-09	4.15639e-06	sh_Spi1 Suv39h1- UT DOWN
A530032D15Rik	1006.93	-1.41785	0.419723	-3.37806	0.000729978	0.0446462	sh_Spi1 Suv39h1- UT DOWN
Ell2	482.982	-1.40324	0.456538	-3.07365	0.00211454	0.0957118	sh_Spi1 Suv39h1- UT DOWN
Atp10a	1383.58	-1.37055	0.35203	-3.89328	9.88984e-05	0.0091851	sh_Spi1 Suv39h1- UT DOWN
Man1a2	4512.71	-1.36929	0.229548	-5.96515	2.44416e-09	1.45928e-06	sh_Spi1 Suv39h1- UT DOWN
Vwa5a	1005.38	-1.35407	0.341949	-3.95987	7.49905e-05	0.00764415	sh_Spi1 Suv39h1- UT DOWN
D2hgdh	782.191	-1.35375	0.35122	-3.85441	0.000116011	0.0103896	sh_Spi1 Suv39h1- UT DOWN
Dip2a	549.419	-1.35153	0.375512	-3.59917	0.000319232	0.0236836	sh_Spi1 Suv39h1- UT DOWN
Eri3	3414.34	-1.35009	0.24073	-5.60833	2.04286e-08	8.42977e-06	sh_Spi1 Suv39h1- UT DOWN
Inpp5b	3014.28	-1.33822	0.307283	-4.355	1.33064e-05	0.00196278	sh_Spi1 Suv39h1- UT DOWN
Ncf1	1244.89	-1.31918	0.336599	-3.91914	8.88653e-05	0.00850529	sh_Spi1 Suv39h1- UT DOWN
Cd5	1075.69	-1.3046	0.341686	-3.81812	0.000134474	0.0116279	sh_Spi1 Suv39h1- UT DOWN
Csprs	637.73	-1.29092	0.37204	-3.46984	0.000520762	0.0352936	sh_Spi1 Suv39h1- UT DOWN
Ppfia4	614.081	-1.26066	0.373147	-3.37844	0.000728981	0.0446462	sh_Spi1 Suv39h1- UT DOWN
Pign	1201.36	-1.23804	0.345132	-3.58713	0.000334336	0.024514	sh_Spi1 Suv39h1- UT DOWN
Celf2	6196.74	-1.23226	0.275373	-4.47489	7.64509e-06	0.00124055	sh_Spi1 Suv39h1- UT DOWN
Slc39a14	978.55	-1.22859	0.353426	-3.47623	0.000508516	0.0349219	sh_Spi1 Suv39h1- UT DOWN
Dcaf5	2925.49	-1.20841	0.242777	-4.97745	6.44271e-07	0.000168289	sh_Spi1 Suv39h1- UT DOWN
Akt3	1472.39	-1.20612	0.331557	-3.63774	0.000275042	0.0212869	sh_Spi1 Suv39h1- UT DOWN
Ccdc88a	561.309	-1.19571	0.377776	-3.16514	0.00155007	0.0763365	sh_Spi1 Suv39h1- UT DOWN
Tifa	667.327	-1.18896	0.383716	-3.09855	0.00194473	0.0907278	sh_Spi1 Suv39h1- UT DOWN
Sipa1	10276.3	-1.17544	0.345595	-3.40121	0.000670883	0.0426981	sh_Spi1 Suv39h1- UT DOWN
Mgat4a	1652.53	-1.17248	0.306747	-3.8223	0.000132212	0.0115116	sh_Spi1 Suv39h1- UT DOWN
Usp46	627.223	-1.16896	0.356314	-3.28071	0.00103547	0.056694	sh_Spi1 Suv39h1- UT DOWN
Pnp	2357.41	-1.1544	0.292627	-3.94496	7.98118e-05	0.00800544	sh_Spi1 Suv39h1- UT DOWN
Plekhm3	704.502	-1.13517	0.345929	-3.2815	0.00103257	0.056694	sh_Spi1 Suv39h1- UT DOWN
Alox5ap	676.94	-1.12451	0.348034	-3.23105	0.00123338	0.0641667	sh_Spi1 Suv39h1- UT DOWN
Stat2	1204.09	-1.12376	0.307147	-3.65871	0.000253489	0.0198834	sh_Spi1 Suv39h1- UT DOWN
Irf4	2714.73	-1.11898	0.263478	-4.24695	2.16703e-05	0.00293692	sh_Spi1 Suv39h1- UT DOWN
Arrdc3	1657.76	-1.11542	0.269549	-4.13811	3.50181e-05	0.0042217	sh_Spi1 Suv39h1- UT DOWN
Txndc16	5523.92	-1.11413	0.312586	-3.56423	0.000364923	0.0264474	sh_Spi1 Suv39h1- UT DOWN
Fam102a	769.493	-1.11278	0.347214	-3.20488	0.00135121	0.0688677	sh_Spi1 Suv39h1- UT DOWN
Med12l	1227.3	-1.08878	0.329359	-3.30575	0.000947238	0.0537397	sh_Spi1 Suv39h1- UT DOWN
Aak1	1651.97	-1.07754	0.273527	-3.93944	8.16736e-05	0.00812717	sh_Spi1 Suv39h1- UT DOWN
Birc3	1285.74	-1.0683	0.319186	-3.34694	0.000817093	0.0480972	sh_Spi1 Suv39h1- UT DOWN
Slco4a1	1121.11	-1.06154	0.302354	-3.51094	0.000446532	0.0312772	sh_Spi1 Suv39h1- UT DOWN
Haao	1102.71	-1.0596	0.319027	-3.32134	0.00089586	0.0517617	sh_Spi1 Suv39h1- UT DOWN
Arhgef6	5622.85	-1.04163	0.238718	-4.36344	1.28032e-05	0.00195764	sh_Spi1 Suv39h1- UT DOWN
Itga4	5797.02	-1.01737	0.256873	-3.9606	7.47604e-05	0.00764415	sh_Spi1 Suv39h1- UT DOWN
Gimap7	1340.37	-1.0141	0.288301	-3.5175	0.000435637	0.0306855	sh_Spi1 Suv39h1- UT DOWN
Cd93	4294.19	-1.01055	0.283932	-3.55913	0.000372086	0.0266584	sh_Spi1 Suv39h1- UT DOWN
Dck	2671.07	-1.0018	0.25253	-3.96705	7.27676e-05	0.00754017	sh_Spi1 Suv39h1- UT DOWN
Plekhb2	2682.05	-0.993698	0.289687	-3.43025	0.00060302	0.0393785	sh_Spi1 Suv39h1- UT DOWN
Cd47	2330.53	-0.988512	0.256628	-3.85193	0.000117189	0.0103985	sh_Spi1 Suv39h1- UT DOWN
Ulbp1	2427.77	-0.9872	0.315347	-3.13052	0.00174498	0.0831886	sh_Spi1 Suv39h1- UT DOWN
Nedd4l	1008.81	-0.981438	0.312291	-3.1427	0.00167398	0.0810362	sh_Spi1 Suv39h1- UT DOWN
Hs2st1	2530.17	-0.964262	0.248873	-3.87452	0.000106834	0.0096366	sh_Spi1 Suv39h1- UT DOWN
Rbpj	3349.57	-0.963356	0.237181	-4.06169	4.87192e-05	0.00550307	sh_Spi1 Suv39h1- UT DOWN
Cox15	3641.35	-0.960832	0.28598	-3.35978	0.000780039	0.046572	sh_Spi1 Suv39h1- UT DOWN
Stat3	5518.45	-0.955403	0.223427	-4.27613	1.90168e-05	0.00262014	sh_Spi1 Suv39h1- UT DOWN
Mbnl1	16495.1	-0.953909	0.274199	-3.47889	0.000503488	0.034877	sh_Spi1 Suv39h1- UT DOWN
Mical3	1260.27	-0.950494	0.287917	-3.30128	0.000962442	0.0541125	sh_Spi1 Suv39h1- UT DOWN
Slain2	2414.46	-0.941428	0.259623	-3.62613	0.000287699	0.021995	sh_Spi1 Suv39h1- UT DOWN
Tbp	1359.41	-0.941372	0.295742	-3.18309	0.00145715	0.0733722	sh_Spi1 Suv39h1- UT DOWN
Gm5537	13938.7	-0.941259	0.283856	-3.31598	0.000913237	0.0520462	sh_Spi1 Suv39h1- UT DOWN
Cand1	9304.24	-0.91011	0.21716	-4.19097	2.77762e-05	0.00348258	sh_Spi1 Suv39h1- UT DOWN
Cdc42se2	4716.66	-0.903984	0.225887	-4.00193	6.28268e-05	0.00671139	sh_Spi1 Suv39h1- UT DOWN
Wdfy4	11582.3	-0.902399	0.210617	-4.28454	1.83116e-05	0.002551	sh_Spi1 Suv39h1- UT DOWN
Bcl2l11	5348.76	-0.893582	0.248134	-3.60121	0.000316741	0.0236532	sh_Spi1 Suv39h1- UT DOWN
Larp4	4340.95	-0.892856	0.228466	-3.90805	9.3045e-05	0.00877142	sh_Spi1 Suv39h1- UT DOWN
Mrpl2	3173.38	-0.883716	0.272427	-3.24386	0.00117921	0.0631293	sh_Spi1 Suv39h1- UT DOWN
Lat2	2145.44	-0.881614	0.271656	-3.24533	0.00117314	0.0631279	sh_Spi1 Suv39h1- UT DOWN
Prkar2a	3705.01	-0.873308	0.232974	-3.74853	0.000177876	0.0147696	sh_Spi1 Suv39h1- UT DOWN
Tmem229b	7070.74	-0.849425	0.225845	-3.7611	0.000169168	0.0142256	sh_Spi1 Suv39h1- UT DOWN
Bank1	1953.9	-0.84195	0.267191	-3.15112	0.00162647	0.0790416	sh_Spi1 Suv39h1- UT DOWN
Aff3	4057.58	-0.836284	0.263707	-3.17126	0.00151779	0.0755161	sh_Spi1 Suv39h1- UT DOWN
Lrrc8c	2305.38	-0.828286	0.251965	-3.28731	0.00101149	0.0561155	sh_Spi1 Suv39h1- UT DOWN
Agps	1935.29	-0.818331	0.263262	-3.10843	0.00188082	0.0883212	sh_Spi1 Suv39h1- UT DOWN
Ldlrap1	2116.85	-0.810627	0.262945	-3.08288	0.0020501	0.0934695	sh_Spi1 Suv39h1- UT DOWN
Syk	5006.03	-0.808466	0.251573	-3.21364	0.00131064	0.0673476	sh_Spi1 Suv39h1- UT DOWN
Lsm1	2160.8	-0.79952	0.255864	-3.12479	0.00177935	0.0841866	sh_Spi1 Suv39h1- UT DOWN
Sec23b	2908.15	-0.784242	0.24389	-3.21555	0.00130193	0.0671751	sh_Spi1 Suv39h1- UT DOWN
Ints2	2867.7	-0.767242	0.242147	-3.1685	0.00153229	0.0759359	sh_Spi1 Suv39h1- UT DOWN
Plac8	6197.27	-0.764125	0.223641	-3.41675	0.000633742	0.0409754	sh_Spi1 Suv39h1- UT DOWN
Gsn	8309.85	-0.761249	0.223309	-3.40894	0.000652157	0.041932	sh_Spi1 Suv39h1- UT DOWN
Foxo1	6618.49	-0.755986	0.223437	-3.38344	0.000715834	0.04441	sh_Spi1 Suv39h1- UT DOWN
Crlf3	3702.33	-0.745525	0.23255	-3.20587	0.00134654	0.0688677	sh_Spi1 Suv39h1- UT DOWN
G3bp2	6088.4	-0.730127	0.229973	-3.17484	0.00149919	0.0748877	sh_Spi1 Suv39h1- UT DOWN
Tapbp	4335.84	-0.718214	0.231838	-3.09791	0.00194891	0.0907278	sh_Spi1 Suv39h1- UT DOWN
Ak4	4781.95	-0.711974	0.225312	-3.15994	0.00157799	0.0771375	sh_Spi1 Suv39h1- UT DOWN
Pde7a	4975.4	-0.705792	0.228696	-3.08616	0.00202762	0.0931222	sh_Spi1 Suv39h1- UT DOWN
Raf1	5045.71	0.704775	0.227743	3.09461	0.00197073	0.0911771	sh_Spi1 Suv39h1- UT UP
Cxxc5	4591.15	0.720645	0.23538	3.06162	0.00220144	0.0982268	sh_Spi1 Suv39h1- UT UP
Aes	6632.77	0.741806	0.218765	3.39088	0.000696676	0.0438941	sh_Spi1 Suv39h1- UT UP
Ighd	5956.07	0.764867	0.2202	3.47352	0.000513688	0.0350034	sh_Spi1 Suv39h1- UT UP
Scap	3487.24	0.769952	0.236176	3.26008	0.00111382	0.0607176	sh_Spi1 Suv39h1- UT UP
Srgap2	2699.93	0.79309	0.250607	3.16468	0.00155254	0.0763365	sh_Spi1 Suv39h1- UT UP
Dap	3262.76	0.797521	0.246203	3.23928	0.0011983	0.0631293	sh_Spi1 Suv39h1- UT UP
Csnk1g2	11244.7	0.810058	0.211201	3.83548	0.00012532	0.0109879	sh_Spi1 Suv39h1- UT UP
Asap1	3788.31	0.819367	0.248082	3.30281	0.000957228	0.0540618	sh_Spi1 Suv39h1- UT UP
Jag2	2461.51	0.823593	0.254513	3.23596	0.00121235	0.0634476	sh_Spi1 Suv39h1- UT UP
Scaf1	5679.84	0.835583	0.232431	3.59497	0.000324433	0.0239279	sh_Spi1 Suv39h1- UT UP
Ptms	2369.27	0.853618	0.257226	3.31855	0.000904863	0.0520421	sh_Spi1 Suv39h1- UT UP
Mcm3ap	3691.04	0.861874	0.254656	3.38446	0.000713188	0.04441	sh_Spi1 Suv39h1- UT UP
Scrib	4102.94	0.86995	0.283659	3.06689	0.002163	0.0972032	sh_Spi1 Suv39h1- UT UP
Klra1	4605.24	0.935014	0.271936	3.43836	0.00058525	0.0386204	sh_Spi1 Suv39h1- UT UP
Pycr1	2506.85	0.952328	0.250712	3.79849	0.00014558	0.0124169	sh_Spi1 Suv39h1- UT UP
Ipo11	3072.71	0.968399	0.246739	3.92479	8.6806e-05	0.0083721	sh_Spi1 Suv39h1- UT UP
Ndrg1	8354.91	0.970108	0.232713	4.16869	3.06349e-05	0.00376569	sh_Spi1 Suv39h1- UT UP
Oxnad1	1736.91	0.980341	0.275622	3.55684	0.000375349	0.0267394	sh_Spi1 Suv39h1- UT UP
Tbk1	1264.29	0.992391	0.291284	3.40695	0.000656926	0.0420231	sh_Spi1 Suv39h1- UT UP
Crot	1284	0.993636	0.286839	3.46409	0.000532031	0.0357525	sh_Spi1 Suv39h1- UT UP
PCDHGB6	3009.06	1.03588	0.308027	3.36294	0.00077117	0.0462628	sh_Spi1 Suv39h1- UT UP
E4f1	1277.55	1.05074	0.325374	3.22932	0.00124086	0.064289	sh_Spi1 Suv39h1- UT UP
Mul1	1159.53	1.06963	0.296182	3.61139	0.000304566	0.0230039	sh_Spi1 Suv39h1- UT UP
Hivep3	2573.05	1.07969	0.247372	4.36465	1.27329e-05	0.00195764	sh_Spi1 Suv39h1- UT UP
Atf7	2421.88	1.08967	0.263842	4.13002	3.62736e-05	0.00433142	sh_Spi1 Suv39h1- UT UP
Med12	3521.55	1.11519	0.243568	4.57853	4.68248e-06	0.000903214	sh_Spi1 Suv39h1- UT UP
Nt5dc2	2287.65	1.12812	0.313276	3.60105	0.000316935	0.0236532	sh_Spi1 Suv39h1- UT UP
Fam73b	872.763	1.14631	0.34401	3.3322	0.000861628	0.0500143	sh_Spi1 Suv39h1- UT UP
Mpzl1	902.916	1.20119	0.326715	3.67658	0.000236379	0.0188772	sh_Spi1 Suv39h1- UT UP
Atp6v0a1	2147.94	1.21345	0.278582	4.3558	1.32579e-05	0.00196278	sh_Spi1 Suv39h1- UT UP
Rpl15-ps3	7601.92	1.21699	0.323703	3.75959	0.00017019	0.0142256	sh_Spi1 Suv39h1- UT UP
Lrrc32	1006.96	1.23232	0.355803	3.46348	0.000533236	0.0357525	sh_Spi1 Suv39h1- UT UP
Stx16	3626.78	1.23672	0.248187	4.983	6.26076e-07	0.000167016	sh_Spi1 Suv39h1- UT UP
Klf3	995.23	1.23944	0.334238	3.70825	0.000208693	0.0169982	sh_Spi1 Suv39h1- UT UP
Slc26a11	1508.12	1.24939	0.359475	3.4756	0.000509708	0.0349219	sh_Spi1 Suv39h1- UT UP
Slc25a53	617.25	1.25322	0.375554	3.33698	0.000846927	0.0496204	sh_Spi1 Suv39h1- UT UP
Ddit3	2576.31	1.27801	0.303246	4.21444	2.50403e-05	0.00318702	sh_Spi1 Suv39h1- UT UP
Plekhh3	529.756	1.29334	0.380825	3.39616	0.000683395	0.0432748	sh_Spi1 Suv39h1- UT UP
Rhobtb1	1182.29	1.29349	0.331613	3.9006	9.59565e-05	0.00897837	sh_Spi1 Suv39h1- UT UP
Mmp9	5124.22	1.30815	0.233821	5.59467	2.21048e-08	8.66092e-06	sh_Spi1 Suv39h1- UT UP
Cbs	1009.17	1.32262	0.313914	4.21332	2.51647e-05	0.00318702	sh_Spi1 Suv39h1- UT UP
Akap9	1715.01	1.34097	0.404323	3.31659	0.000911227	0.0520462	sh_Spi1 Suv39h1- UT UP
Ctps2	1919.33	1.35284	0.260875	5.1858	2.15091e-07	6.1104e-05	sh_Spi1 Suv39h1- UT UP
Sorcs2	1236.75	1.36944	0.410579	3.33538	0.000851821	0.049675	sh_Spi1 Suv39h1- UT UP
Ints8	1297.77	1.37713	0.307057	4.48493	7.29374e-06	0.00120328	sh_Spi1 Suv39h1- UT UP
Hnrnpll	1378.11	1.46177	0.410437	3.56151	0.000368729	0.0265697	sh_Spi1 Suv39h1- UT UP
Ahnak	1116.97	1.47842	0.439457	3.36421	0.000767642	0.0462628	sh_Spi1 Suv39h1- UT UP
Spp1	5116.6	1.49891	0.233277	6.42546	1.31472e-10	1.03025e-07	sh_Spi1 Suv39h1- UT UP
Tnk2	5262.9	1.5568	0.228399	6.81614	9.35187e-12	9.01952e-09	sh_Spi1 Suv39h1- UT UP
Larp1b	3792.92	1.55931	0.242284	6.43588	1.22762e-10	1.02613e-07	sh_Spi1 Suv39h1- UT UP
Gsr	294.855	1.56231	0.481965	3.24154	0.00118884	0.0631293	sh_Spi1 Suv39h1- UT UP
Txnrd2	1279.26	1.56872	0.298835	5.24945	1.52552e-07	4.78173e-05	sh_Spi1 Suv39h1- UT UP
Tbxa2r	447.18	1.57548	0.435314	3.61918	0.00029554	0.0224574	sh_Spi1 Suv39h1- UT UP
Dmwd	4992.74	1.59994	0.331972	4.8195	1.43917e-06	0.000328079	sh_Spi1 Suv39h1- UT UP
Nfia	501.479	1.60174	0.429843	3.72635	0.000194275	0.0160252	sh_Spi1 Suv39h1- UT UP
4930523C07Rik	1408.02	1.61084	0.328065	4.91013	9.10145e-07	0.000231652	sh_Spi1 Suv39h1- UT UP
Acp2	589.256	1.65662	0.518485	3.19512	0.00139774	0.0706647	sh_Spi1 Suv39h1- UT UP
Tecpr1	4729.02	1.67293	0.225689	7.41253	1.23916e-13	2.58944e-10	sh_Spi1 Suv39h1- UT UP
Ltbp4	1501.77	1.72207	0.37794	4.55647	5.20209e-06	0.000931769	sh_Spi1 Suv39h1- UT UP
Pnrc2	3789.65	1.84117	0.232536	7.91781	2.41728e-15	7.57698e-12	sh_Spi1 Suv39h1- UT UP
Tcea3	344.885	1.8873	0.490116	3.85073	0.000117769	0.0103985	sh_Spi1 Suv39h1- UT UP
Zfp704	911.587	1.89682	0.584367	3.24594	0.00117064	0.0631279	sh_Spi1 Suv39h1- UT UP
Slc15a4	1567.9	1.90573	0.318876	5.97638	2.28151e-09	1.43028e-06	sh_Spi1 Suv39h1- UT UP
Dtx3	284.775	1.93875	0.493914	3.92529	8.66265e-05	0.0083721	sh_Spi1 Suv39h1- UT UP
Gstp2	1569.67	1.94372	0.424386	4.58007	4.64811e-06	0.000903214	sh_Spi1 Suv39h1- UT UP
B4galt4	267.898	1.94719	0.502373	3.87598	0.000106198	0.0096366	sh_Spi1 Suv39h1- UT UP
Capn5	661.347	1.95776	0.477941	4.09623	4.19929e-05	0.00492063	sh_Spi1 Suv39h1- UT UP
Dmpk	150.107	1.97928	0.640465	3.09038	0.00199899	0.0921447	sh_Spi1 Suv39h1- UT UP
Pcdhgc4	1039.42	1.98205	0.504608	3.9279	8.56917e-05	0.0083721	sh_Spi1 Suv39h1- UT UP
Nrgn	2850.94	2.06923	0.360434	5.74094	9.41532e-09	4.37219e-06	sh_Spi1 Suv39h1- UT UP
Podxl	302.645	2.08911	0.473185	4.41499	1.01016e-05	0.00160321	sh_Spi1 Suv39h1- UT UP
Dlk1	1311.59	2.09094	0.360226	5.80454	6.45444e-09	3.46067e-06	sh_Spi1 Suv39h1- UT UP
Klra7	451.254	2.11739	0.463531	4.56796	4.92492e-06	0.000921621	sh_Spi1 Suv39h1- UT UP
Myo7a	367.052	2.19843	0.52038	4.22466	2.39299e-05	0.00309445	sh_Spi1 Suv39h1- UT UP
4930432K21Rik	270.299	2.22745	0.515499	4.32095	1.55362e-05	0.00226503	sh_Spi1 Suv39h1- UT UP
Kcnk1	860.381	2.26223	0.431886	5.23803	1.62297e-07	4.84494e-05	sh_Spi1 Suv39h1- UT UP
Tac4	274.416	2.28629	0.560049	4.08231	4.459e-05	0.00517657	sh_Spi1 Suv39h1- UT UP
Cers4	1609.23	2.33344	0.51179	4.55938	5.13059e-06	0.000931769	sh_Spi1 Suv39h1- UT UP
Pcdh1	154.664	2.35942	0.7171	3.29023	0.00100107	0.0557842	sh_Spi1 Suv39h1- UT UP
Arvcf	155.435	2.37303	0.640189	3.70677	0.00020992	0.0169982	sh_Spi1 Suv39h1- UT UP
Car2	2736.53	2.42467	0.465348	5.21045	1.88383e-07	5.4929e-05	sh_Spi1 Suv39h1- UT UP
Fgf9	234.572	2.48615	0.552554	4.49938	6.81507e-06	0.0011393	sh_Spi1 Suv39h1- UT UP
Agtrap	697.831	2.54314	0.345317	7.36466	1.77605e-13	3.18116e-10	sh_Spi1 Suv39h1- UT UP
Wipi1	651.026	2.5896	0.410447	6.30921	2.80469e-10	1.95362e-07	sh_Spi1 Suv39h1- UT UP
Ret	265.343	2.63985	0.631416	4.18085	2.90427e-05	0.00360532	sh_Spi1 Suv39h1- UT UP
Klhdc1	249.36	2.65592	0.716557	3.70651	0.000210139	0.0169982	sh_Spi1 Suv39h1- UT UP
Slc7a3	197.893	2.67444	0.597924	4.47287	7.71754e-06	0.00124055	sh_Spi1 Suv39h1- UT UP
Gm10163	303.635	2.68765	0.481282	5.58437	2.34555e-08	8.91168e-06	sh_Spi1 Suv39h1- UT UP
Efnb2	810.402	2.69308	0.494801	5.44275	5.24651e-08	1.83029e-05	sh_Spi1 Suv39h1- UT UP
Celsr1	353.335	2.7635	0.881547	3.13483	0.00171955	0.082922	sh_Spi1 Suv39h1- UT UP
Mier2	304.838	2.78584	0.830439	3.35466	0.000794621	0.0470687	sh_Spi1 Suv39h1- UT UP
Tle6	145.135	2.79081	0.702606	3.97208	7.12465e-05	0.00750663	sh_Spi1 Suv39h1- UT UP
Zic2	162.86	2.86646	0.782413	3.66362	0.000248679	0.0197338	sh_Spi1 Suv39h1- UT UP
Ltbp3	106.995	2.92687	0.937874	3.12075	0.00180391	0.0850279	sh_Spi1 Suv39h1- UT UP
Gfra1	574.733	2.96894	0.456552	6.50295	7.8758e-11	7.05334e-08	sh_Spi1 Suv39h1- UT UP
Nrxn2	248.765	2.97302	0.650356	4.57138	4.84517e-06	0.000920436	sh_Spi1 Suv39h1- UT UP
Adcy6	79.2622	3.07026	0.898621	3.41663	0.000634011	0.0409754	sh_Spi1 Suv39h1- UT UP
Gm14681	1038.83	3.08866	0.395047	7.81847	5.34712e-15	1.34084e-11	sh_Spi1 Suv39h1- UT UP
Tmem132a	104.587	3.25417	0.803332	4.05085	5.10326e-05	0.00571292	sh_Spi1 Suv39h1- UT UP
Stc2	1008.49	3.29801	0.578944	5.6966	1.22217e-08	5.28401e-06	sh_Spi1 Suv39h1- UT UP
Pcbd1	190.513	3.34233	0.691436	4.83389	1.33889e-06	0.000316735	sh_Spi1 Suv39h1- UT UP
Pcsk9	228.966	3.35996	0.791813	4.24337	2.20187e-05	0.00293692	sh_Spi1 Suv39h1- UT UP
Fam78b	237.594	3.38105	0.844812	4.00213	6.27745e-05	0.00671139	sh_Spi1 Suv39h1- UT UP
Pdgfc	193.694	3.47885	0.708926	4.90721	9.23799e-07	0.000231652	sh_Spi1 Suv39h1- UT UP
Perp	194.04	3.72301	0.864886	4.30463	1.67269e-05	0.0023832	sh_Spi1 Suv39h1- UT UP
Fnbp1l	307.978	3.77653	0.821214	4.59872	4.25104e-06	0.000867947	sh_Spi1 Suv39h1- UT UP
Lhx2	834.63	3.90111	0.536144	7.27624	3.4325e-13	4.30366e-10	sh_Spi1 Suv39h1- UT UP
Kif26a	347.972	4.14878	0.503156	8.24551	1.64453e-16	6.87304e-13	sh_Spi1 Suv39h1- UT UP
Lama5	124.432	4.21849	1.07869	3.91074	9.20144e-05	0.00873998	sh_Spi1 Suv39h1- UT UP
6430548M08Rik	41.921	4.46745	1.24926	3.57609	0.000348767	0.0254235	sh_Spi1 Suv39h1- UT UP
Cav1	58.5296	4.4706	1.32179	3.38222	0.000719032	0.04441	sh_Spi1 Suv39h1- UT UP
Cp	46.8979	4.59565	1.18567	3.87599	0.000106194	0.0096366	sh_Spi1 Suv39h1- UT UP
Pdgfa	645.611	4.64374	0.635151	7.31124	2.64679e-13	3.68728e-10	sh_Spi1 Suv39h1- UT UP
Iqgap2	72.9108	5.35613	1.00045	5.35373	8.616e-08	2.84283e-05	sh_Spi1 Suv39h1- UT UP
Sardh	23.2958	6.18061	2.00461	3.0832	0.00204789	0.0934695	sh_Spi1 Suv39h1- UT UP
Bai2	31.9604	6.68022	1.77534	3.76278	0.000168038	0.0142256	sh_Spi1 Suv39h1- UT UP
Gm14287	30.5269	8.3514	2.12692	3.92652	8.61854e-05	0.0083721	sh_Spi1 Suv39h1- UT UP
Tinagl1	37.9551	8.41229	2.02169	4.16101	3.16837e-05	0.0038568	sh_Spi1 Suv39h1- UT UP
Gm10177	92.3686	9.90312	1.7094	5.79333	6.90037e-09	3.46067e-06	sh_Spi1 Suv39h1- UT UP

## Sheet: S3G - DEA, Suv- ADR sh_Spi1
Supplementary Data 3G. Differentially expressed genes by knockdown of PU.1 in TIS-deficient Suv39h1-;bcl2 lymphomas
Results of DE analysis by DESeq2 encompassing Suv39h1-;bcl2 ADR lymphomas, comparing sh_Spi1 vs sh_ctrl pairs (n = 2).
DESeq2 models count data with a negative binomial distribution. Significance testing was performed using the Wald test
"padj" is the Benjamini-Hochberg adjusted P value.
The gene symbols used for downstream analyses of gene sets are assigned in the "Gene set" column.
Related to Fig. 7a
SYMBOL	baseMean	log2FoldChange	lfcSE	stat	pvalue	padj (<0.10)	Gene set
Ebi3	40.182	-5.70665	1.5994	-3.568	0.000359714	0.0421031	sh_Spi1 Suv39h1- ADR DOWN
Ms4a6c	53.8603	-4.94966	1.31787	-3.75579	0.000172794	0.0253392	sh_Spi1 Suv39h1- ADR DOWN
Pde6h	29.6455	-4.89205	1.44479	-3.38598	0.000709236	0.0685487	sh_Spi1 Suv39h1- ADR DOWN
5430435G22Rik	60.688	-3.38449	1.04181	-3.24866	0.00115951	0.0924346	sh_Spi1 Suv39h1- ADR DOWN
Cysltr1	135.359	-3.31544	0.704629	-4.70522	2.53587e-06	0.000980383	sh_Spi1 Suv39h1- ADR DOWN
Dgcr8	1652.88	-3.30861	0.293424	-11.2759	1.72664e-29	2.20285e-25	sh_Spi1 Suv39h1- ADR DOWN
Stx11	64.5177	-3.28568	0.965378	-3.40351	0.000665249	0.0657926	sh_Spi1 Suv39h1- ADR DOWN
Nlrp3	455.606	-3.18711	0.633622	-5.02999	4.905e-07	0.000231771	sh_Spi1 Suv39h1- ADR DOWN
Ccr6	126.331	-2.95415	0.776874	-3.80261	0.000143178	0.0220081	sh_Spi1 Suv39h1- ADR DOWN
Aktip	1374.92	-2.93387	0.34246	-8.56704	1.06175e-17	2.70916e-14	sh_Spi1 Suv39h1- ADR DOWN
Cybb	3596.29	-2.9159	0.337838	-8.63106	6.07836e-18	1.93869e-14	sh_Spi1 Suv39h1- ADR DOWN
Ttc28	79.1879	-2.90327	0.881935	-3.29194	0.000995006	0.0846285	sh_Spi1 Suv39h1- ADR DOWN
Gpr171	657.792	-2.87185	0.429684	-6.68363	2.33101e-11	2.47826e-08	sh_Spi1 Suv39h1- ADR DOWN
Fam129a	227.809	-2.75239	0.807407	-3.40892	0.000652197	0.0650057	sh_Spi1 Suv39h1- ADR DOWN
Pik3r5	373.489	-2.62303	0.742101	-3.5346	0.000408392	0.0457041	sh_Spi1 Suv39h1- ADR DOWN
Tnip3	109.098	-2.58978	0.806205	-3.21231	0.00131674	0.0990305	sh_Spi1 Suv39h1- ADR DOWN
Entpd1	756.13	-2.54836	0.351693	-7.24598	4.29336e-13	6.08608e-10	sh_Spi1 Suv39h1- ADR DOWN
Gpr183	955.959	-2.52062	0.605935	-4.15989	3.18399e-05	0.00712371	sh_Spi1 Suv39h1- ADR DOWN
Lrch1	1610.24	-2.51188	0.297319	-8.44843	2.95235e-17	6.27767e-14	sh_Spi1 Suv39h1- ADR DOWN
Pkd1	2088.51	-2.4908	0.287343	-8.66838	4.38316e-18	1.86401e-14	sh_Spi1 Suv39h1- ADR DOWN
Asb2	127.036	-2.48097	0.692898	-3.58056	0.000342853	0.0412324	sh_Spi1 Suv39h1- ADR DOWN
Kdm4b	4569.56	-2.40385	0.473775	-5.07383	3.89893e-07	0.000203205	sh_Spi1 Suv39h1- ADR DOWN
Pou2f2	1365.43	-2.35935	0.416833	-5.66017	1.51222e-08	1.07183e-05	sh_Spi1 Suv39h1- ADR DOWN
Lrrc32	1093.91	-2.35844	0.569625	-4.14034	3.46793e-05	0.00749896	sh_Spi1 Suv39h1- ADR DOWN
A930011G23Rik	203.576	-2.30191	0.697752	-3.29903	0.000970189	0.0836329	sh_Spi1 Suv39h1- ADR DOWN
Sorl1	775.665	-2.26111	0.550157	-4.10993	3.9578e-05	0.00841559	sh_Spi1 Suv39h1- ADR DOWN
Nckipsd	1243.37	-2.18457	0.605391	-3.60852	0.000307945	0.0388987	sh_Spi1 Suv39h1- ADR DOWN
Rbpsuh-rs3	219.131	-2.17954	0.589251	-3.69883	0.000216592	0.0297127	sh_Spi1 Suv39h1- ADR DOWN
Dock10	459.788	-2.15746	0.481977	-4.47627	7.59595e-06	0.00254875	sh_Spi1 Suv39h1- ADR DOWN
Dock8	1418.52	-2.07418	0.33033	-6.27912	3.40491e-10	2.89599e-07	sh_Spi1 Suv39h1- ADR DOWN
Dhcr7	4512.47	-2.04627	0.430027	-4.75847	1.95064e-06	0.000802785	sh_Spi1 Suv39h1- ADR DOWN
Rpgrip1l	171.796	-2.03196	0.591924	-3.4328	0.000597388	0.0611425	sh_Spi1 Suv39h1- ADR DOWN
Gm10259	1050.18	-2.02546	0.37716	-5.37029	7.86094e-08	5.27842e-05	sh_Spi1 Suv39h1- ADR DOWN
Gja1	992.978	-2.00092	0.488254	-4.09811	4.16531e-05	0.00871164	sh_Spi1 Suv39h1- ADR DOWN
Lrwd1	3218.88	-1.98986	0.263563	-7.54985	4.35772e-14	6.94948e-11	sh_Spi1 Suv39h1- ADR DOWN
Ets2	636.663	-1.98943	0.529664	-3.75602	0.000172636	0.0253392	sh_Spi1 Suv39h1- ADR DOWN
Cd83	3595.19	-1.78429	0.344065	-5.18591	2.14963e-07	0.000124659	sh_Spi1 Suv39h1- ADR DOWN
S1pr2	420.947	-1.75454	0.443879	-3.95275	7.72589e-05	0.0138827	sh_Spi1 Suv39h1- ADR DOWN
Fcer2a	2315.29	-1.73375	0.382226	-4.53592	5.73521e-06	0.00197756	sh_Spi1 Suv39h1- ADR DOWN
Ppfia4	331.128	-1.72253	0.485284	-3.54954	0.000385905	0.0443548	sh_Spi1 Suv39h1- ADR DOWN
9930111J21Rik1	369.07	-1.708	0.458872	-3.72216	0.000197523	0.0279999	sh_Spi1 Suv39h1- ADR DOWN
Sla	402.91	-1.70424	0.520738	-3.27274	0.00106509	0.0871056	sh_Spi1 Suv39h1- ADR DOWN
Mtx3	458.08	-1.67846	0.403863	-4.15601	3.23856e-05	0.00712371	sh_Spi1 Suv39h1- ADR DOWN
Gm1966	374.618	-1.67559	0.462189	-3.62533	0.000288594	0.038353	sh_Spi1 Suv39h1- ADR DOWN
Rad54l	1329.02	-1.66658	0.466427	-3.57308	0.000352812	0.0416776	sh_Spi1 Suv39h1- ADR DOWN
Chtf8	3700.94	-1.66141	0.257264	-6.458	1.06098e-10	1.04123e-07	sh_Spi1 Suv39h1- ADR DOWN
Cd80	401.739	-1.6419	0.442759	-3.70834	0.000208622	0.0292483	sh_Spi1 Suv39h1- ADR DOWN
Slc10a7	1567.55	-1.61791	0.48024	-3.36897	0.000754494	0.0707782	sh_Spi1 Suv39h1- ADR DOWN
Kctd12	295.485	-1.58369	0.47934	-3.3039	0.00095349	0.0835901	sh_Spi1 Suv39h1- ADR DOWN
Zc3h12a	769.814	-1.56429	0.400382	-3.90699	9.34514e-05	0.0161115	sh_Spi1 Suv39h1- ADR DOWN
Sidt2	6929.47	-1.55725	0.341056	-4.56597	4.97185e-06	0.00176197	sh_Spi1 Suv39h1- ADR DOWN
Vprbp	3098.75	-1.55328	0.292646	-5.30772	1.11002e-07	6.74364e-05	sh_Spi1 Suv39h1- ADR DOWN
Mbnl1	16690.7	-1.51209	0.255243	-5.9241	3.14003e-09	2.50378e-06	sh_Spi1 Suv39h1- ADR DOWN
D3Ertd254e	923.248	-1.50706	0.37657	-4.00207	6.27903e-05	0.0117806	sh_Spi1 Suv39h1- ADR DOWN
Ebf1	1584.17	-1.47536	0.345247	-4.27335	1.92559e-05	0.00492136	sh_Spi1 Suv39h1- ADR DOWN
Nfatc2ip	822.714	-1.46586	0.343204	-4.27111	1.94502e-05	0.00492136	sh_Spi1 Suv39h1- ADR DOWN
Sh3bgrl2	927.846	-1.46532	0.333778	-4.39011	1.13292e-05	0.00336136	sh_Spi1 Suv39h1- ADR DOWN
Itgb3	1176.69	-1.45091	0.372701	-3.89296	9.90295e-05	0.0168456	sh_Spi1 Suv39h1- ADR DOWN
Hells	2324.08	-1.43146	0.443374	-3.22855	0.00124418	0.0962014	sh_Spi1 Suv39h1- ADR DOWN
Msrb3	3045.7	-1.42879	0.267587	-5.33954	9.31832e-08	5.94415e-05	sh_Spi1 Suv39h1- ADR DOWN
Tnfaip3	1977	-1.39757	0.303502	-4.60482	4.12813e-06	0.00150476	sh_Spi1 Suv39h1- ADR DOWN
Ttc13	1874.57	-1.38407	0.291278	-4.75173	2.01682e-06	0.000804082	sh_Spi1 Suv39h1- ADR DOWN
Tceanc	508.907	-1.35619	0.406625	-3.33525	0.000852237	0.0779125	sh_Spi1 Suv39h1- ADR DOWN
Cd5	653.201	-1.35402	0.384073	-3.52543	0.000422799	0.0465006	sh_Spi1 Suv39h1- ADR DOWN
Cdh17	1387.55	-1.34419	0.346483	-3.87952	0.000104662	0.0175695	sh_Spi1 Suv39h1- ADR DOWN
5031439G07Rik	5018.16	-1.33754	0.376207	-3.55532	0.000377518	0.0437852	sh_Spi1 Suv39h1- ADR DOWN
Gimap4	6346.07	-1.31917	0.372431	-3.54204	0.000397043	0.0452275	sh_Spi1 Suv39h1- ADR DOWN
Coro2a	1423.35	-1.3008	0.300531	-4.32835	1.50232e-05	0.00425924	sh_Spi1 Suv39h1- ADR DOWN
Lrrc8c	1875	-1.27173	0.374566	-3.39521	0.000685751	0.0672986	sh_Spi1 Suv39h1- ADR DOWN
Mllt6	3921.42	-1.26595	0.26101	-4.85021	1.23328e-06	0.000561935	sh_Spi1 Suv39h1- ADR DOWN
Cbfa2t3	682.777	-1.26082	0.372819	-3.38187	0.000719941	0.0690602	sh_Spi1 Suv39h1- ADR DOWN
Kansl3	3284.35	-1.25458	0.262863	-4.77275	1.81728e-06	0.000772829	sh_Spi1 Suv39h1- ADR DOWN
Dhdds	1670.78	-1.2042	0.336526	-3.57832	0.000345812	0.0412324	sh_Spi1 Suv39h1- ADR DOWN
Tjap1	2241.31	-1.15562	0.319364	-3.6185	0.000296316	0.0385755	sh_Spi1 Suv39h1- ADR DOWN
Ndc1	1227.95	-1.1475	0.306333	-3.74591	0.000179744	0.0257661	sh_Spi1 Suv39h1- ADR DOWN
Myo1e	1036.03	-1.14644	0.347294	-3.30108	0.00096314	0.0835901	sh_Spi1 Suv39h1- ADR DOWN
Lamc1	2874.43	-1.11438	0.265753	-4.19328	2.74947e-05	0.00637776	sh_Spi1 Suv39h1- ADR DOWN
Slc15a3	3970.52	-1.09581	0.258838	-4.23359	2.29989e-05	0.0054337	sh_Spi1 Suv39h1- ADR DOWN
Pum2	5451.59	-1.09401	0.262716	-4.16423	3.12407e-05	0.0071173	sh_Spi1 Suv39h1- ADR DOWN
Ap1ar	4015.71	-1.09	0.256903	-4.24285	2.20697e-05	0.00531256	sh_Spi1 Suv39h1- ADR DOWN
Snx27	4881.24	-1.08679	0.254603	-4.26857	1.96731e-05	0.00492136	sh_Spi1 Suv39h1- ADR DOWN
Plekhm3	861.774	-1.08584	0.336562	-3.22627	0.00125415	0.0963882	sh_Spi1 Suv39h1- ADR DOWN
Il6ra	1021.62	-1.07746	0.332094	-3.24444	0.00117683	0.0925311	sh_Spi1 Suv39h1- ADR DOWN
Zhx1	1463.93	-1.05902	0.329739	-3.21169	0.00131958	0.0990305	sh_Spi1 Suv39h1- ADR DOWN
Rb1	1654.51	-1.05653	0.29165	-3.62258	0.00029168	0.0383634	sh_Spi1 Suv39h1- ADR DOWN
Azin1	3596.98	-1.04201	0.303612	-3.43204	0.00059906	0.0611425	sh_Spi1 Suv39h1- ADR DOWN
Hdac4	1140.42	-1.03787	0.318353	-3.26012	0.00111364	0.0904953	sh_Spi1 Suv39h1- ADR DOWN
Pim1	2179.54	-1.01935	0.306368	-3.32721	0.000877207	0.0788127	sh_Spi1 Suv39h1- ADR DOWN
Rbpj	3888.46	-1.01443	0.306034	-3.31476	0.000917209	0.0818304	sh_Spi1 Suv39h1- ADR DOWN
Scap	2407.61	-1.01173	0.273056	-3.70523	0.000211196	0.0292873	sh_Spi1 Suv39h1- ADR DOWN
Cyb561a3	3633.56	-0.994307	0.258338	-3.84886	0.00011867	0.0185603	sh_Spi1 Suv39h1- ADR DOWN
Slc2a3	6824.65	-0.989003	0.245117	-4.03483	5.46427e-05	0.0107251	sh_Spi1 Suv39h1- ADR DOWN
Slc25a19	1882.26	-0.98051	0.281624	-3.48163	0.000498369	0.053272	sh_Spi1 Suv39h1- ADR DOWN
E330009J07Rik	2187.04	-0.970702	0.274437	-3.53706	0.000404604	0.0456809	sh_Spi1 Suv39h1- ADR DOWN
Cd52	9069.84	-0.961581	0.254439	-3.77921	0.000157324	0.0238946	sh_Spi1 Suv39h1- ADR DOWN
Stx7	4978.72	-0.952185	0.293255	-3.24695	0.00116648	0.0924346	sh_Spi1 Suv39h1- ADR DOWN
Lax1	2985.09	-0.917773	0.275513	-3.33115	0.000864888	0.078257	sh_Spi1 Suv39h1- ADR DOWN
Rhof	2125.87	-0.908457	0.277579	-3.27279	0.00106493	0.0871056	sh_Spi1 Suv39h1- ADR DOWN
Ehd1	3190.35	-0.906864	0.264717	-3.42578	0.00061303	0.0620717	sh_Spi1 Suv39h1- ADR DOWN
Tbc1d14	3231.06	-0.90406	0.271135	-3.33436	0.000854973	0.0779125	sh_Spi1 Suv39h1- ADR DOWN
Surf4	5731.57	-0.855426	0.253896	-3.3692	0.000753875	0.0707782	sh_Spi1 Suv39h1- ADR DOWN
Larp4	3713.34	-0.824688	0.257067	-3.20807	0.00133628	0.0996972	sh_Spi1 Suv39h1- ADR DOWN
Akap13	5448.91	-0.812934	0.249826	-3.25401	0.0011379	0.0918816	sh_Spi1 Suv39h1- ADR DOWN
Ppp2r4	11726.8	-0.800988	0.238149	-3.36339	0.000769918	0.0716979	sh_Spi1 Suv39h1- ADR DOWN
Sptan1	7382.08	0.848612	0.243841	3.48018	0.000501069	0.053272	sh_Spi1 Suv39h1- ADR UP
Ndufa10	9552.99	0.867387	0.24098	3.59942	0.00031893	0.0398912	sh_Spi1 Suv39h1- ADR UP
Dstn	3230.12	0.901592	0.274631	3.28292	0.00102739	0.0868046	sh_Spi1 Suv39h1- ADR UP
Ltbp4	1954.61	0.937927	0.284779	3.29353	0.00098939	0.0846285	sh_Spi1 Suv39h1- ADR UP
Ptms	2284.97	0.973778	0.276921	3.51645	0.000437355	0.0476904	sh_Spi1 Suv39h1- ADR UP
Rasal3	3665.15	0.980773	0.283338	3.4615	0.000537179	0.0566391	sh_Spi1 Suv39h1- ADR UP
Gstp2	1679.1	0.987296	0.288717	3.4196	0.000627125	0.0629989	sh_Spi1 Suv39h1- ADR UP
Rsrp1	4528.36	1.02371	0.254136	4.02818	5.62097e-05	0.0108655	sh_Spi1 Suv39h1- ADR UP
Slc37a3	1631.42	1.04923	0.297509	3.5267	0.000420774	0.0465006	sh_Spi1 Suv39h1- ADR UP
Zfp513	1045.16	1.06168	0.321561	3.30163	0.000961232	0.0835901	sh_Spi1 Suv39h1- ADR UP
Rps6-ps4	19325.3	1.07632	0.240743	4.47084	7.79129e-06	0.00254875	sh_Spi1 Suv39h1- ADR UP
Telo2	1513.68	1.10646	0.308198	3.59011	0.000330539	0.0409419	sh_Spi1 Suv39h1- ADR UP
Gm6136	1574.03	1.10678	0.309255	3.57888	0.00034507	0.0412324	sh_Spi1 Suv39h1- ADR UP
Wbscr22	1842.6	1.15296	0.299084	3.85497	0.000115745	0.0185603	sh_Spi1 Suv39h1- ADR UP
Hist1h1c	3212.48	1.1568	0.26165	4.42116	9.81713e-06	0.00313117	sh_Spi1 Suv39h1- ADR UP
Sik3	3515.39	1.21445	0.370679	3.27627	0.00105188	0.0871056	sh_Spi1 Suv39h1- ADR UP
Pcca	2552.76	1.22865	0.36431	3.37255	0.000744759	0.0707782	sh_Spi1 Suv39h1- ADR UP
Mxra8	652.442	1.32505	0.366825	3.6122	0.000303613	0.0388987	sh_Spi1 Suv39h1- ADR UP
Nubpl	838.279	1.37595	0.367288	3.74625	0.000179497	0.0257661	sh_Spi1 Suv39h1- ADR UP
Smn1	2476.28	1.4302	0.308223	4.64013	3.48189e-06	0.00130653	sh_Spi1 Suv39h1- ADR UP
Aim1l	593.78	1.48993	0.386965	3.8503	0.000117973	0.0185603	sh_Spi1 Suv39h1- ADR UP
Ppm1l	1226.61	1.50707	0.379	3.97645	6.99517e-05	0.012934	sh_Spi1 Suv39h1- ADR UP
Pou2f1	2768.26	1.52803	0.420419	3.63455	0.00027847	0.037397	sh_Spi1 Suv39h1- ADR UP
Pcdhgc4	964.013	1.59963	0.413155	3.87175	0.000108057	0.0179037	sh_Spi1 Suv39h1- ADR UP
Arl5b	992.456	1.60435	0.394388	4.06794	4.74313e-05	0.00960521	sh_Spi1 Suv39h1- ADR UP
Tcea3	401.966	1.65174	0.428997	3.85025	0.000117999	0.0185603	sh_Spi1 Suv39h1- ADR UP
Zfp704	939.62	1.68648	0.383452	4.39815	1.09178e-05	0.00336136	sh_Spi1 Suv39h1- ADR UP
Bzrap1	702.066	1.70814	0.398021	4.29158	1.77406e-05	0.00481562	sh_Spi1 Suv39h1- ADR UP
Myo6	330.873	1.712	0.523005	3.27339	0.00106265	0.0871056	sh_Spi1 Suv39h1- ADR UP
Podxl	257.034	1.77652	0.551521	3.22113	0.00127688	0.0975474	sh_Spi1 Suv39h1- ADR UP
Dmpk	294.547	1.78122	0.472978	3.76597	0.000165906	0.0249015	sh_Spi1 Suv39h1- ADR UP
Vps9d1	440.415	1.79952	0.409721	4.39206	1.12283e-05	0.00336136	sh_Spi1 Suv39h1- ADR UP
Pnkp	1873.6	1.81433	0.360512	5.03264	4.83761e-07	0.000231771	sh_Spi1 Suv39h1- ADR UP
B4galt4	241.423	1.84258	0.510528	3.60916	0.000307186	0.0388987	sh_Spi1 Suv39h1- ADR UP
Stc2	596.684	1.85306	0.481617	3.84757	0.000119294	0.0185603	sh_Spi1 Suv39h1- ADR UP
Gm2810	244.593	1.86712	0.551093	3.38803	0.000703973	0.0685487	sh_Spi1 Suv39h1- ADR UP
Vps39	2911.93	1.87718	0.293572	6.39426	1.61325e-10	1.47013e-07	sh_Spi1 Suv39h1- ADR UP
Sipa1	10518.6	1.91782	0.247334	7.75395	8.90779e-15	1.62351e-11	sh_Spi1 Suv39h1- ADR UP
Abcg2	188.509	1.93236	0.589543	3.27772	0.00104649	0.0871056	sh_Spi1 Suv39h1- ADR UP
Msantd2	330.148	1.94506	0.60433	3.21854	0.00128846	0.0978465	sh_Spi1 Suv39h1- ADR UP
Zic2	195.993	1.99827	0.56931	3.50999	0.000448119	0.04845	sh_Spi1 Suv39h1- ADR UP
Ramp1	396.093	2.03054	0.498298	4.07496	4.60221e-05	0.00947016	sh_Spi1 Suv39h1- ADR UP
Spp1	4628.26	2.03956	0.345272	5.9071	3.48176e-09	2.61296e-06	sh_Spi1 Suv39h1- ADR UP
Dlk1	1772.91	2.19452	0.513431	4.27424	1.91794e-05	0.00492136	sh_Spi1 Suv39h1- ADR UP
Efnb2	931.622	2.21638	0.619221	3.57931	0.0003445	0.0412324	sh_Spi1 Suv39h1- ADR UP
Ret	299.698	2.25961	0.52516	4.3027	1.68728e-05	0.00467963	sh_Spi1 Suv39h1- ADR UP
Atl1	118.681	2.28771	0.691843	3.30669	0.000944061	0.0835901	sh_Spi1 Suv39h1- ADR UP
Rhod	1270.64	2.33539	0.594567	3.92789	8.56951e-05	0.0149767	sh_Spi1 Suv39h1- ADR UP
Kif26a	239.267	2.43441	0.607896	4.00465	6.21093e-05	0.0117806	sh_Spi1 Suv39h1- ADR UP
Pdgfa	352.958	2.455	0.565629	4.3403	1.42291e-05	0.0041258	sh_Spi1 Suv39h1- ADR UP
Klhdc1	223.084	2.47205	0.71625	3.45138	0.000557738	0.0579901	sh_Spi1 Suv39h1- ADR UP
Tmem132a	100.504	2.49177	0.768959	3.24044	0.00119346	0.0928424	sh_Spi1 Suv39h1- ADR UP
Gmppb	707.062	2.52787	0.359693	7.02787	2.09708e-12	2.67546e-09	sh_Spi1 Suv39h1- ADR UP
Dnhd1	128.54	2.56604	0.79008	3.24782	0.00116294	0.0924346	sh_Spi1 Suv39h1- ADR UP
Capn5	948.951	2.65154	0.523005	5.06982	3.98192e-07	0.000203205	sh_Spi1 Suv39h1- ADR UP
1810014B01Rik	455.727	2.76121	0.650528	4.24457	2.19017e-05	0.00531256	sh_Spi1 Suv39h1- ADR UP
Gfra1	284.854	2.79498	0.548647	5.09431	3.50022e-07	0.000194156	sh_Spi1 Suv39h1- ADR UP
Upk1b	233.691	2.90546	0.86999	3.33964	0.000838859	0.0775519	sh_Spi1 Suv39h1- ADR UP
Wdr60	790.405	3.18967	0.352154	9.0576	1.33347e-19	8.50623e-16	sh_Spi1 Suv39h1- ADR UP
Lhx2	369.779	3.23998	0.677555	4.78187	1.73674e-06	0.000764048	sh_Spi1 Suv39h1- ADR UP
Hspg2	97.434	3.66031	0.927791	3.94519	7.97366e-05	0.0141289	sh_Spi1 Suv39h1- ADR UP
Lrig1	65.8155	3.95335	1.21899	3.24314	0.00118221	0.0925311	sh_Spi1 Suv39h1- ADR UP
Lama5	205.486	3.95406	0.576477	6.859	6.93427e-12	8.04249e-09	sh_Spi1 Suv39h1- ADR UP
Lcp2	78.0887	4.96017	1.36429	3.6357	0.000277225	0.037397	sh_Spi1 Suv39h1- ADR UP
Adamtsl2	61.3992	5.2317	1.29069	4.05342	5.04745e-05	0.0100618	sh_Spi1 Suv39h1- ADR UP
