# Supplementary material for: Senescence-associated lineage-aberrant plasticity evokes T-cell-mediated tumor control
Source: Nat Commun. 2025 Mar 31;16:3079. doi: 10.1038/s41467-025-57429-x (PMC11955568; doi:10.1038/s41467-025-57429-x)
Supplement: Supplementary file 6 — Supplementary Data 4 [file 41467_2025_57429_MOESM6_ESM.xlsx]

## Sheet: Data S4
Supplementary Data 4 provides details on TIS induction in DLBCL cell lines and the corresponding measured parameters, as well as detailed readout values of samples submitted to RNA-seq analysis
			Data corresponds to				Exemplary flow plots and SA-b-gal images shown for WSU-DLCL2 in Supplementary Fig. 5b.
			Fig. 4a	Fig. 4b	Fig. 4c		Characteristics of samples from which RNA-seq data was generated ("UT: CFSElow" and "ADR: CFSEhigh" were sequenced).
			Values represent difference between ADR and UT cell lines				% Sa-b-gal+				% CFSE retention
Senescence category	Cell line	ADR / (ng/ml)	ΔSA-b-gal+ / % (ADR-UT)	Δred. NBT+ / % (ADR-UT)	ΔCD11c+ / % (ADR-UT)		UT: CFSElow	ADR: CFSEhigh	ADR: CFSElow		UT: CFSEhigh	ADR: CFSEhigh	ΔCFSEhigh	Cell line	Senescence category
Senescence-Competent	SU-DHL10	15	0.852349	0.0300363	0.485267		0.0015	0.8864	N/A		0.0037	0.969	0.9653	SU-DHL10	Senescence-Competent
	RCK8	15 (readout on d7)	0.344639	0.00298954	0.0159845		0.0019	0.7875	0.2999		0.0097	0.691	0.6813	RCK8
	Karpas-422	10	0.477261	0.011443	0.0876752		0.0547	0.7709	0.4183		0.0409	0.496	0.4551	Karpas-422
	DB	25	0.572359	0.000406325	N/A		0.0031	0.6636	0.497		0.031	0.685	0.654	DB
	U2932	22.5	0.29297	0.0126557	0.0743		0.0101	0.6436	0.1368		0.0989	0.503	0.4041	U2932
	WSU-DLCL2	8.5	0.452137	0.0367157	0.07068		0	0.5219	0.0095		0.0453	0.432	0.3867	WSU-DLCL2
Intermediate	SUDHL2	15	0.177784	0.00189659	0.0349993		0.0072	0.5133	0.2008		0.177	0.426	0.249	SUDHL2	Intermediate
	OCI-Ly1	7.5	0.123408	0.00531144	0.00025		0.0072	0.4849	0.1452		0.0078	0.507	0.4992	OCI-Ly1
	OCI-Ly18	15	0.144259	0.000888322	0.000506		0.0179	0.2105	0.1029		0.112	0.878	0.766	OCI-Ly18
	Toledo	15	0.0927958	0	0		0	0.1484	0.0301		0.0285	0.387	0.3585	Toledo
	RI-1	15	0.0163654	0.002911	0		0.0109	0.1423	0.037		0.077	0.721	0.644	RI-1
	SU-DHL4	7.5	0.0856346	1.19506e-06	0		0	0.015	0		0.0537	0.412	0.3583	SU-DHL4
Senescence-Incompetent	SU-DHL6	10	0	-2.20205e-05	0		0	0.0112	0.0012		0.0774	0.304	0.2266	SU-DHL6	Senescence-Incompetent
	SU-DHL5	5	0.00411967	0.0010304	0.0214497		0.0018	0.002	0		0.341	0.506	0.165	SU-DHL5
	CARNAVAL	10	0.00213144	0	0		0	0.0065	0		0.265	0.0838	-0.1812	CARNAVAL
	OCI-Ly7	2.5	0.0171242	0.00325603	0.07506		0	0	0		0.271	0.236	-0.035	OCI-Ly7
	DOHH-2	2.5	0	0	0.00036		0	0.0015	0		0.49	0.432	-0.058	DOHH-2
	NU-DHL1	2.5	0	0	-0.08485		0	0.0057	0.0012		0.229	0.209	-0.02	NU-DHL1
Legend:	N/A = not available						Criteria for senescence-competence: >50% SA-β-gal in CellTracehigh fractions and >35% excess of CellTracehigh-gated cells in ADR over untreated samples (ΔCFSEhigh);
							senescence-intermediate: one of the two criteria fulfilled;
							senescence-incompetent: neither of the two criteria fulfilled.
