# Supplementary material for: Senescence-associated lineage-aberrant plasticity evokes T-cell-mediated tumor control
Source: Nat Commun. 2025 Mar 31;16:3079. doi: 10.1038/s41467-025-57429-x (PMC11955568; doi:10.1038/s41467-025-57429-x)
Supplement: Supplementary file 7 — Supplementary Data 5 [file 41467_2025_57429_MOESM7_ESM.xlsx]

## Sheet: Data S5
Supplementary Data 5. PU.1 targets in TIS, related to Fig. 5, 6, 7, Supplementary Fig. 1, 2, 7, 8
Note that this file contains the following worksheets:
Worksheet	Description
A	List of genes affected by knockdown of PU.1 exlusively in TIS
B	Humanized version of the PU.1(TIS) gene set, and compared to human DCvsB_UP gene set
C	Pathway annotation of the murine PU.1(TIS) gene set

## Sheet: S5A - PU.1 targets in TIS
Supplementary Data 5A. List of genes that were downregulated by sh_Spi1 exclusively in the TIS condition
Results were generated by using the UpSet plot platform at https://vcg.github.io/upset/ and an input matrix that can be data-loaded into the UpSet platform by providing following URL: https://raw.githubusercontent.com/quickaccessfor/projectrnaseqanalysis/main/rnaseq_shTF_description_fc0.58.json. DE analysis results were used to compare sh_Spi1 with sh_ctrl paired samples from both, TIS-proficient…
Resulting gene set is referred to as "PU.1 targets in TIS", "PU1_lymphTIS" or "PU.1(TIS)" in the paper and relates to Fig. 5a, 6c,7a, Supplementary Fig. 1c, 2f,g, 3c
Gene Symbol	log2FoldChange	padj	Direction upon sh_Spi1	TIS-restricted ?	Ensembl Gene ID
Rpl15-ps3	-10.6009	0.0694383	DOWN	Yes	ENSMUSG00000061167
Gm14548	-6.1721	0.00193032	DOWN	Yes	ENSMUSG00000074417
Gm15210	-4.87599	0.0495271	DOWN	Yes	ENSMUSG00000071041
Wfdc17	-4.43224	7.27335e-07	DOWN	Yes	ENSMUSG00000069792
Ccl22	-3.90981	0.00611155	DOWN	Yes	ENSMUSG00000031779
Il1b	-3.50803	1.88262e-05	DOWN	Yes	ENSMUSG00000027398
Bcl2a1b	-2.97921	0.0273715	DOWN	Yes	ENSMUSG00000089929
Nxpe2	-2.87949	0.00154528	DOWN	Yes	ENSMUSG00000032028
Clec12a	-2.87103	1.96394e-18	DOWN	Yes	ENSMUSG00000053063
Ptafr	-2.86464	0.000538569	DOWN	Yes	ENSMUSG00000056529
Hsd17b14	-2.74607	0.0302655	DOWN	Yes	ENSMUSG00000030825
Myo1f	-2.71449	0.00659312	DOWN	Yes	ENSMUSG00000024300
Rnase6	-2.59596	0.000326251	DOWN	Yes	ENSMUSG00000021880
March1	-2.58911	0.0021498	DOWN	Yes	ENSMUSG00000036469
Ccr1	-2.55794	0.00510781	DOWN	Yes	ENSMUSG00000025804
Siglech	-2.53345	0.0226362	DOWN	Yes	ENSMUSG00000051504
Sirpa	-2.37102	1.53021e-06	DOWN	Yes	ENSMUSG00000037902
Pira2	-2.30893	0.0450694	DOWN	Yes	ENSMUSG00000089942
Fgf2	-2.25952	0.0279443	DOWN	Yes	ENSMUSG00000037225
Aph1c	-2.23851	0.000750638	DOWN	Yes	ENSMUSG00000053040
Cd300ld	-2.14646	0.0291173	DOWN	Yes	ENSMUSG00000034641
Tmem51	-2.12013	0.0694383	DOWN	Yes	ENSMUSG00000040616
Lrrc25	-2.04364	6.70743e-05	DOWN	Yes	ENSMUSG00000049988
Ccl6	-1.98407	0.0775854	DOWN	Yes	ENSMUSG00000018927
Cemip	-1.96542	0.0872309	DOWN	Yes	ENSMUSG00000052353
Hck	-1.94221	0.0108259	DOWN	Yes	ENSMUSG00000003283
Csf2rb2	-1.90174	4.4713e-07	DOWN	Yes	ENSMUSG00000071714
Lamp3	-1.89776	0.0715549	DOWN	Yes	ENSMUSG00000041247
Ms4a1	-1.83227	0.00134073	DOWN	Yes	ENSMUSG00000024673
Apba1	-1.82876	0.00714075	DOWN	Yes	ENSMUSG00000024897
Lcp2	-1.81013	0.0302655	DOWN	Yes	ENSMUSG00000002699
Cacna1f	-1.76275	0.0928653	DOWN	Yes	ENSMUSG00000031142
AC132444.5	-1.73396	0.0104037	DOWN	Yes	ENSMUSG00000095500
Tbc1d9	-1.71883	0.0352469	DOWN	Yes	ENSMUSG00000031709
H2-DMb2	-1.65336	7.03133e-05	DOWN	Yes	ENSMUSG00000037548
H2-DMa	-1.59003	2.6238e-08	DOWN	Yes	ENSMUSG00000037649
Ccl3	-1.57695	0.0578902	DOWN	Yes	ENSMUSG00000000982
M1ap	-1.53794	0.0478189	DOWN	Yes	ENSMUSG00000030041
Scimp	-1.53319	0.0108003	DOWN	Yes	ENSMUSG00000057135
Renbp	-1.51817	0.0184055	DOWN	Yes	ENSMUSG00000031387
H2-Eb1	-1.5123	9.43361e-05	DOWN	Yes	ENSMUSG00000060586
Atxn1	-1.49864	0.0898486	DOWN	Yes	ENSMUSG00000046876
H2-Ab1	-1.45932	3.93656e-05	DOWN	Yes	ENSMUSG00000073421
Fcgr3	-1.44766	0.000221252	DOWN	Yes	ENSMUSG00000059498
Gm7609	-1.44731	0.0244725	DOWN	Yes	ENSMUSG00000079457
Csf2rb	-1.44664	0.000753946	DOWN	Yes	ENSMUSG00000071713
Bcl3	-1.43158	1.41747e-05	DOWN	Yes	ENSMUSG00000053175
Fcrl5	-1.41792	0.008939	DOWN	Yes	ENSMUSG00000048031
Ciita	-1.37287	9.20672e-05	DOWN	Yes	ENSMUSG00000022504
Kctd14	-1.34359	0.0011855	DOWN	Yes	ENSMUSG00000051727
Plxnc1	-1.33015	0.0442931	DOWN	Yes	ENSMUSG00000074785
H2-DMb1	-1.32502	0.000830298	DOWN	Yes	ENSMUSG00000079547
AC133103.1	-1.29334	0.0050293	DOWN	Yes	ENSMUSG00000079190
Hpse	-1.2933	4.84564e-05	DOWN	Yes	ENSMUSG00000035273
Cul7	-1.29188	0.010608	DOWN	Yes	ENSMUSG00000038545
Lmo2	-1.26624	0.000738978	DOWN	Yes	ENSMUSG00000032698
Sh2b2	-1.26401	0.0558268	DOWN	Yes	ENSMUSG00000005057
Bcar3	-1.26322	0.0185859	DOWN	Yes	ENSMUSG00000028121
Cmpk2	-1.22362	0.0233136	DOWN	Yes	ENSMUSG00000020638
Mad2l1	-1.2022	0.00238005	DOWN	Yes	ENSMUSG00000029910
Rcan2	-1.18382	0.00504147	DOWN	Yes	ENSMUSG00000039601
Pla2g7	-1.18038	0.000654022	DOWN	Yes	ENSMUSG00000023913
Itgb7	-1.16988	0.00942946	DOWN	Yes	ENSMUSG00000001281
Themis2	-1.16205	7.46369e-07	DOWN	Yes	ENSMUSG00000037731
Mvb12b	-1.14775	0.000205574	DOWN	Yes	ENSMUSG00000038740
Gm6377	-1.14455	0.0429284	DOWN	Yes	ENSMUSG00000048621
Antxr1	-1.13567	0.0159523	DOWN	Yes	ENSMUSG00000033420
Slc37a2	-1.11653	0.0806135	DOWN	Yes	ENSMUSG00000032122
Cd68	-1.10091	0.000738978	DOWN	Yes	ENSMUSG00000018774
Mob3b	-1.0883	0.0756083	DOWN	Yes	ENSMUSG00000073910
Vpreb3	-1.08541	0.00821477	DOWN	Yes	ENSMUSG00000000903
Rasgrp1	-1.0847	0.0126838	DOWN	Yes	ENSMUSG00000027347
Tlr2	-1.05762	0.000419156	DOWN	Yes	ENSMUSG00000027995
Oas2	-1.05007	0.0183429	DOWN	Yes	ENSMUSG00000032690
Epsti1	-1.04108	0.0251249	DOWN	Yes	ENSMUSG00000022014
Ly6a	-1.03615	0.0273715	DOWN	Yes	ENSMUSG00000075602
Ctss	-1.03217	0.008939	DOWN	Yes	ENSMUSG00000038642
Slfn2	-1.02829	0.0437863	DOWN	Yes	ENSMUSG00000072620
Rac2	-1.02734	0.0393097	DOWN	Yes	ENSMUSG00000033220
Plb1	-1.02617	0.0868056	DOWN	Yes	ENSMUSG00000029134
Tnfaip8l2	-1.02556	0.00462196	DOWN	Yes	ENSMUSG00000013707
Pik3ap1	-1.02171	0.0009494	DOWN	Yes	ENSMUSG00000025017
Rtp4	-1.02087	0.0455154	DOWN	Yes	ENSMUSG00000033355
Armcx2	-1.00852	0.0370795	DOWN	Yes	ENSMUSG00000033436
Tonsl	-1.00161	0.0301604	DOWN	Yes	ENSMUSG00000059323
Ly6e	-1.00075	0.000181097	DOWN	Yes	ENSMUSG00000022587
Ifi27l2a	-0.989327	0.0010072	DOWN	Yes	ENSMUSG00000079017
Acot1	-0.988865	0.0304072	DOWN	Yes	ENSMUSG00000072949
Tlr9	-0.982694	0.0106183	DOWN	Yes	ENSMUSG00000045322
Ly6d	-0.982004	0.0450694	DOWN	Yes	ENSMUSG00000034634
Cd180	-0.96099	0.008939	DOWN	Yes	ENSMUSG00000021624
Rasgrp3	-0.960289	0.0450694	DOWN	Yes	ENSMUSG00000071042
Chst10	-0.960076	0.0154902	DOWN	Yes	ENSMUSG00000026080
Cyp51	-0.946226	4.23096e-06	DOWN	Yes	ENSMUSG00000001467
Ckb	-0.938667	0.008939	DOWN	Yes	ENSMUSG00000001270
Slc28a2	-0.929495	0.0393097	DOWN	Yes	ENSMUSG00000027219
Tagap	-0.919291	0.00635053	DOWN	Yes	ENSMUSG00000033450
Hivep1	-0.912564	0.0217277	DOWN	Yes	ENSMUSG00000021366
Dusp5	-0.908717	0.0492871	DOWN	Yes	ENSMUSG00000034765
Dnase2a	-0.900902	0.000159708	DOWN	Yes	ENSMUSG00000003812
Dusp10	-0.900193	0.0935216	DOWN	Yes	ENSMUSG00000039384
B4galnt1	-0.897719	1.06696e-05	DOWN	Yes	ENSMUSG00000006731
Suox	-0.896875	0.00204395	DOWN	Yes	ENSMUSG00000049858
Gm18342	-0.880711	0.00399995	DOWN	Yes	ENSMUSG00000101279
Trex1	-0.876505	0.0118873	DOWN	Yes	ENSMUSG00000049734
1700021K19Rik	-0.872771	0.00181887	DOWN	Yes	ENSMUSG00000035629
Sp140	-0.872508	0.0020776	DOWN	Yes	ENSMUSG00000070031
Ptdss2	-0.86996	0.00316501	DOWN	Yes	ENSMUSG00000025495
Itgam	-0.837167	0.0221164	DOWN	Yes	ENSMUSG00000030786
Stk17b	-0.834403	0.0069317	DOWN	Yes	ENSMUSG00000026094
Ptprc	-0.831911	0.000266291	DOWN	Yes	ENSMUSG00000026395
Tgfb1	-0.808408	0.0113085	DOWN	Yes	ENSMUSG00000002603
H2-Oa	-0.804733	0.0184906	DOWN	Yes	ENSMUSG00000024334
Kcnk6	-0.804022	0.0565256	DOWN	Yes	ENSMUSG00000046410
Hvcn1	-0.801906	0.00536004	DOWN	Yes	ENSMUSG00000064267
Cd300a	-0.79799	0.0129426	DOWN	Yes	ENSMUSG00000034652
Itgb2	-0.796905	0.000221252	DOWN	Yes	ENSMUSG00000000290
Srxn1	-0.79243	0.0550933	DOWN	Yes	ENSMUSG00000032802
Rdh12	-0.782784	0.00123018	DOWN	Yes	ENSMUSG00000021123
Evi2a	-0.782337	0.00888021	DOWN	Yes	ENSMUSG00000078771
Gpr137b-ps	-0.781516	0.0981391	DOWN	Yes	ENSMUSG00000097715
Oasl1	-0.774416	0.029394	DOWN	Yes	ENSMUSG00000041827
Sh3bgrl3	-0.772164	0.00047444	DOWN	Yes	ENSMUSG00000028843
Lyn	-0.770742	0.0037899	DOWN	Yes	ENSMUSG00000042228
Slamf9	-0.770524	0.025059	DOWN	Yes	ENSMUSG00000026548
Sp100	-0.753801	0.0126838	DOWN	Yes	ENSMUSG00000026222
Cotl1	-0.752821	0.0953479	DOWN	Yes	ENSMUSG00000031827
Pde4a	-0.748941	0.000465151	DOWN	Yes	ENSMUSG00000032177
Lgmn	-0.747569	2.96593e-05	DOWN	Yes	ENSMUSG00000021190
Icam1	-0.740951	0.0145015	DOWN	Yes	ENSMUSG00000037405
Ly86	-0.73448	0.00166187	DOWN	Yes	ENSMUSG00000021423
Sh2d3c	-0.719655	0.0551976	DOWN	Yes	ENSMUSG00000059013
Acox3	-0.710111	0.0131102	DOWN	Yes	ENSMUSG00000029098
Gm2a	-0.706188	0.0304072	DOWN	Yes	ENSMUSG00000000594
Micu1	-0.704033	0.0017711	DOWN	Yes	ENSMUSG00000020111
Coro1a	-0.702679	0.0586293	DOWN	Yes	ENSMUSG00000030707
Napsa	-0.70063	0.00528969	DOWN	Yes	ENSMUSG00000002204
Ptger4	-0.687729	0.0145015	DOWN	Yes	ENSMUSG00000039942
Atp6v0a1	-0.68603	0.0113085	DOWN	Yes	ENSMUSG00000019302
Samhd1	-0.684999	0.0750935	DOWN	Yes	ENSMUSG00000027639
Ccr7	-0.683648	0.0234305	DOWN	Yes	ENSMUSG00000037944
Btg1	-0.680766	0.0069317	DOWN	Yes	ENSMUSG00000036478
Calhm2	-0.665174	0.0773363	DOWN	Yes	ENSMUSG00000033033
Man2b1	-0.657665	0.000525656	DOWN	Yes	ENSMUSG00000005142
Gns	-0.656561	0.00104436	DOWN	Yes	ENSMUSG00000034707
Tln1	-0.653471	0.0359534	DOWN	Yes	ENSMUSG00000028465
Plxnb2	-0.653437	0.0313232	DOWN	Yes	ENSMUSG00000036606
Card11	-0.653289	0.0596481	DOWN	Yes	ENSMUSG00000036526
Tor3a	-0.650841	0.0602054	DOWN	Yes	ENSMUSG00000060519
Pdxk	-0.647566	0.0139049	DOWN	Yes	ENSMUSG00000032788
Cd82	-0.647255	0.0219525	DOWN	Yes	ENSMUSG00000027215
Fcrla	-0.645878	0.0812332	DOWN	Yes	ENSMUSG00000038421
Chd9	-0.639629	0.0139049	DOWN	Yes	ENSMUSG00000056608
Shisa5	-0.638194	0.0384915	DOWN	Yes	ENSMUSG00000025647
Scpep1	-0.637398	0.0442931	DOWN	Yes	ENSMUSG00000000278
Tpm4	-0.635146	0.00515407	DOWN	Yes	ENSMUSG00000031799
Elovl5	-0.635026	0.0543013	DOWN	Yes	ENSMUSG00000032349
Cep83	-0.631254	0.0159523	DOWN	Yes	ENSMUSG00000020024
Tubb2b	-0.622953	0.0125381	DOWN	Yes	ENSMUSG00000045136
Tceanc2	-0.622663	0.018493	DOWN	Yes	ENSMUSG00000028619
Smc6	-0.619741	0.0367931	DOWN	Yes	ENSMUSG00000020608
Parp14	-0.617124	0.0586293	DOWN	Yes	ENSMUSG00000034422
Fmnl3	-0.616131	0.0908894	DOWN	Yes	ENSMUSG00000023008
Emb	-0.598434	0.0951525	DOWN	Yes	ENSMUSG00000021728
Mgat1	-0.591233	0.0359321	DOWN	Yes	ENSMUSG00000020346
Swap70	-0.585222	0.00214184	DOWN	Yes	ENSMUSG00000031015
Zfp709	-0.580196	0.0589157	DOWN	Yes	ENSMUSG00000056019

## Sheet: S5B - PU.1(TIS) humanized vs DC
Supplementary Data 5B. Humanized gene set list of "PU.1 targets in TIS" and compared to DC signature
For probing of the PU1_lymphTIS gene set in human settings, the mouse gene symbols were converted to human orthologs using ﻿dbOrtho (https://biodbnetabcc.ncifcrf.gov/db/dbOrtho.php) and HCOP (https://www.genenames.org/tools/hcop) database tools and manual curation.
Resulting gene set is referred to as "PU.1 targets in TIS", "PU1_lymphTIS" or "PU.1(TIS)" and used in Fig. 6a,e and Supplementary Fig. 1c, 2g, 7g, 8a,b,c
PU1(TIS)_HUM (152 genes)		DC_vs_B_UP_HUM (143 genes)		Overlap between PU1(TIS) and DC (Excel function)	Overlap between PU1(TIS) and DC (extracted, 7genes)
ACOT1		TNFRSF1A			KCNK6
ACOX3		TIFAB			CSF2RB
ANOS1		PLXDC2			ITGB2
ANTXR1		AKAP13			SAMHD1
APBA1		TYROBP			PLXNB2
APH1B		DOCK1			LGMN
ARMCX2		OSCAR			COTL1
ATP6V0A1		CPVL
ATXN1		NAPSB
B4GALNT1		RNF130
BCAR3		VDR
BCL2A1		CD74
BCL3		OGT
BTG1		CLEC10A
CACNA1F		SLC7A11
CALHM2		MT-CO1
CARD11		CYP2S1
CCL22		HLA-DPA1
CCL3		FERMT3
CCR1		KCTD12
CCR7		CD109
CD180		GPX1
CD300A		CTSB
CD300LD		CD36
CD68		IRF4
CD82		SPATS2L
CEMIP		GPRIN3
CEP83		SH3BP4
CHD9		PLD4
CHST10		TGFBI
CIITA		CSF2RA
CKB		EPB41L3
CLEC12A		KLF4
CMPK2		FRMD4B
CORO1A		CALCRL
COTL1		H2AFY
CSF2RB		SCN9A
CTSS		GRAMD1B
CUL7		PALD1
CYP51A1		ARL4C
DNASE2		GAPDH
DUSP10		H3F3B
DUSP5		CD4
ELOVL5		SH2B3
EMB		S100A4
EPSTI1		ACTG1
EVI2A		HNRNPH1
FCGR2A		MPEG1
FCRL5		ETS2
FCRLA		ID2
FGF2		TTYH2
FMNL3		IL18R1
GM2A		FNIP2
GNS		MYCL
HCK		VIM
HIVEP1		B2M
HLA-DMA		RRBP1
HLA-DMB		HLA-DRA
HLA-DOA		RUNX2
HLA-DQB1		MCL1
HLA-DRB5		DAPK1
HPSE		FURIN
HSD17B14		KCNK6		KCNK6
HVCN1		HLA-B
IFI27L2		GNA15
ICAM1		GPR183
IL1B		THBD
ITGAM		GRN
ITGB2		MT-ND4
ITGB7		PLAUR
KCNK6		SLC4A3
KCTD14		APOBR
LAMP3		SPNS3
LCP2		CST3
LGMN		APP
LMO2		SHTN1
LRRC25		FCGRT
LY6D		FOS
LY6E		FOSL2
LY86		MT-CO2
LYN		SULF2
M1AP		TMEM170B
MAD2L1		P2RY6
MAN2B1		INPP4A
MARCH1		TNFRSF1B
MGAT1		PSAP
MICU1		B3GNT5
MOB3B		LYZ
MS4A1		AXL
MVB12B		C15orf39
MYO1F		ANXA1
NAPSA		SMOX
NXPE2		CSF2RB		CSF2RB
OAS2		CD33
OASL		DST
PARP14		ITGB2		ITGB2
PDE4A		FLT3
PDXK		SAMHD1		SAMHD1
PIK3AP1		ALDH2
PLA2G7		SPRED2
PLB1		PTPRE
PLXNB2		PABPC1
PLXNC1		CSF1R
PTAFR		P2RY1
PTDSS2		MT-CO3
PTGER4		LCP1
PTPRC		PLXNB2		PLXNB2
RAC2		FCER1G
RASGRP1		GNAQ
RASGRP3		AMICA1
RCAN2		MT-ATP6
RDH12		FAM160A1
RENBP		CUEDC1
RNASE6		LGMN		LGMN
RTP4		SRGN
SAMHD1		BHLHE40
SCIMP		LTBR
SCPEP1		COTL1		COTL1
SH2B2		SLC8A1
SH2D3C		PLEK
SH3BGRL3		SMIM3
SHISA5		CBX6
SIRPA		SLC7A5
SLAMF9		LILRB4
SLC28A2		ZMIZ1
SLC37A2		FCER1A
SLFN12		MOB1B
SMC6		NEGR1
SP100		UBC
SP140		CCDC50
SRXN1		TNFRSF21
STK17B		CSF3R
SUOX		FAM105A
SWAP70		ITM2C
TAGAP		DDX5
TBC1D9		CCDC88A
TCEANC2		MS4A6A
TGFB1		DOCK5
THEMIS2		TNFAIP2
TLN1		DAB2
TLR2		TBC1D8
TLR9		LGALS1
TMEM51		H1F0
TNFAIP8L2
TONSL
TOR3A
TPM4
TREX1
TUBB2B
VPREB3
ZNF443
CCL23

## Sheet: S5C - Annotation of PU.1(TIS)
Supplementary Data 5C. Pathway annotation of "PU.1 targets in TIS"
The mouse gene set PU.1_lymphTIS was annotated using the pathway overrepresentation analysis tool of the innateDB platform at innatedb.com
Tabular results for Fig. 7a are shown here.
Pathway Name	Pathway Id	Source Name	Pathway uploaded gene count	Genes in InnateDB for this entity	Pathway p-value	Pathway p-value (corrected)	Gene Symbols	Genes (Symbol|IDBG-ID|Ensembl|Entrez)
Staphylococcus aureus infection	10352	KEGG	11	51	2.38332e-12	2.40715e-10	Fcgr3; H2-Ab1; H2-DMa; H2-DMb1; H2-DMb2; H2-Eb1; H2-Oa; Icam1; Itgam; Itgb2; Ptafr;	Fcgr3|IDBG-204038|ENSMUSG00000059498|14131|; H2-Ab1|IDBG-170861|ENSMUSG00000073421|14961|; H2-DMa|IDBG-170449|ENSMUSG00000037649|14998|; H2-DMb1|IDBG-252191|ENSMUSG00000079547|14999|; H2-DMb2|IDBG-170493|ENSMUSG00000037548|15000|; H2-Eb1|IDBG-171115|ENSMUSG00000060586|14969|; H2-Oa|IDBG-170180|ENSMUSG00000024334|15001|; Icam1|IDBG-138668|ENSMUSG00000037405|15894|; Itgam|IDBG-210531|ENSMUSG0000003…
Leishmaniasis	10360	KEGG	12	64	1.34297e-12	2.71279e-10	Fcgr3; H2-Ab1; H2-DMa; H2-DMb1; H2-DMb2; H2-Eb1; H2-Oa; Il1b; Itgam; Itgb2; Tgfb1; Tlr2;	Fcgr3|IDBG-204038|ENSMUSG00000059498|14131|; H2-Ab1|IDBG-170861|ENSMUSG00000073421|14961|; H2-DMa|IDBG-170449|ENSMUSG00000037649|14998|; H2-DMb1|IDBG-252191|ENSMUSG00000079547|14999|; H2-DMb2|IDBG-170493|ENSMUSG00000037548|15000|; H2-Eb1|IDBG-171115|ENSMUSG00000060586|14969|; H2-Oa|IDBG-170180|ENSMUSG00000024334|15001|; Il1b|IDBG-205936|ENSMUSG00000027398|16176|; Itgam|IDBG-210531|ENSMUSG00000030…
Phagosome	10382	KEGG	14	165	1.03108e-09	6.9426e-08	Atp6v0a1; Coro1a; Ctss; Fcgr3; H2-Ab1; H2-DMa; H2-DMb1; H2-DMb2; H2-Eb1; H2-Oa; Itgam; Itgb2; Tlr2; Tubb2b;	Atp6v0a1|IDBG-211715|ENSMUSG00000019302|11975|; Coro1a|IDBG-209756|ENSMUSG00000030707|12721|; Ctss|IDBG-172850|ENSMUSG00000038642|13040|; Fcgr3|IDBG-204038|ENSMUSG00000059498|14131|; H2-Ab1|IDBG-170861|ENSMUSG00000073421|14961|; H2-DMa|IDBG-170449|ENSMUSG00000037649|14998|; H2-DMb1|IDBG-252191|ENSMUSG00000079547|14999|; H2-DMb2|IDBG-170493|ENSMUSG00000037548|15000|; H2-Eb1|IDBG-171115|ENSMUSG0000…
Intestinal immune network for IgA production	8107	KEGG	8	41	6.43015e-09	2.59778e-07	H2-Ab1; H2-DMa; H2-DMb1; H2-DMb2; H2-Eb1; H2-Oa; Itgb7; Tgfb1;	H2-Ab1|IDBG-170861|ENSMUSG00000073421|14961|; H2-DMa|IDBG-170449|ENSMUSG00000037649|14998|; H2-DMb1|IDBG-252191|ENSMUSG00000079547|14999|; H2-DMb2|IDBG-170493|ENSMUSG00000037548|15000|; H2-Eb1|IDBG-171115|ENSMUSG00000060586|14969|; H2-Oa|IDBG-170180|ENSMUSG00000024334|15001|; Itgb7|IDBG-188077|ENSMUSG00000001281|16421|; Tgfb1|IDBG-158292|ENSMUSG00000002603|21803|;
Immune System	17702	REACTOME	29	884	6.24612e-09	3.15429e-07	Card11; Cd180; Ciita; Csf2rb; Csf2rb2; Ctss; Cul7; Fgf2; H2-Ab1; Hck; Icam1; Il1b; Itgam; Itgb7; Lcp2; Lgmn; Ly86; Lyn; Oas2; Oasl1; Pik3ap1; Ptafr; Ptprc; Rasgrp1; Sirpa; Sp100; Tlr9; Trex1; Tubb2b;	Card11|IDBG-207118|ENSMUSG00000036526|108723|; Cd180|IDBG-179053|ENSMUSG00000021624|17079|; Ciita|IDBG-132343|ENSMUSG00000022504|12265|; Csf2rb|IDBG-158959|ENSMUSG00000071713|12983|; Csf2rb2|IDBG-158858|ENSMUSG00000071714|12984|; Ctss|IDBG-172850|ENSMUSG00000038642|13040|; Cul7|IDBG-187621|ENSMUSG00000038545|66515|; Fgf2|IDBG-140464|ENSMUSG00000037225|14173|; H2-Ab1|IDBG-170861|ENSMUSG00000073421…
Viral myocarditis	8115	KEGG	9	73	4.71254e-08	1.58656e-06	H2-Ab1; H2-DMa; H2-DMb1; H2-DMb2; H2-Eb1; H2-Oa; Icam1; Itgb2; Rac2;	H2-Ab1|IDBG-170861|ENSMUSG00000073421|14961|; H2-DMa|IDBG-170449|ENSMUSG00000037649|14998|; H2-DMb1|IDBG-252191|ENSMUSG00000079547|14999|; H2-DMb2|IDBG-170493|ENSMUSG00000037548|15000|; H2-Eb1|IDBG-171115|ENSMUSG00000060586|14969|; H2-Oa|IDBG-170180|ENSMUSG00000024334|15001|; Icam1|IDBG-138668|ENSMUSG00000037405|15894|; Itgb2|IDBG-167243|ENSMUSG00000000290|16414|; Rac2|IDBG-159514|ENSMUSG00000033…
Antigen processing and presentation	687	KEGG	9	75	5.99565e-08	1.73017e-06	Ciita; Ctss; H2-Ab1; H2-DMa; H2-DMb1; H2-DMb2; H2-Eb1; H2-Oa; Lgmn;	Ciita|IDBG-132343|ENSMUSG00000022504|12265|; Ctss|IDBG-172850|ENSMUSG00000038642|13040|; H2-Ab1|IDBG-170861|ENSMUSG00000073421|14961|; H2-DMa|IDBG-170449|ENSMUSG00000037649|14998|; H2-DMb1|IDBG-252191|ENSMUSG00000079547|14999|; H2-DMb2|IDBG-170493|ENSMUSG00000037548|15000|; H2-Eb1|IDBG-171115|ENSMUSG00000060586|14969|; H2-Oa|IDBG-170180|ENSMUSG00000024334|15001|; Lgmn|IDBG-165744|ENSMUSG000000211…
Asthma	2791	KEGG	6	23	8.59096e-08	2.16922e-06	H2-Ab1; H2-DMa; H2-DMb1; H2-DMb2; H2-Eb1; H2-Oa;	H2-Ab1|IDBG-170861|ENSMUSG00000073421|14961|; H2-DMa|IDBG-170449|ENSMUSG00000037649|14998|; H2-DMb1|IDBG-252191|ENSMUSG00000079547|14999|; H2-DMb2|IDBG-170493|ENSMUSG00000037548|15000|; H2-Eb1|IDBG-171115|ENSMUSG00000060586|14969|; H2-Oa|IDBG-170180|ENSMUSG00000024334|15001|;
Interferon gamma signaling	18614	REACTOME	7	43	2.23892e-07	5.02513e-06	Ciita; H2-Ab1; Icam1; Oas2; Oasl1; Ptafr; Sp100;	Ciita|IDBG-132343|ENSMUSG00000022504|12265|; H2-Ab1|IDBG-170861|ENSMUSG00000073421|14961|; Icam1|IDBG-138668|ENSMUSG00000037405|15894|; Oas2|IDBG-196257|ENSMUSG00000032690|246728|; Oasl1|IDBG-193110|ENSMUSG00000041827|231655|; Ptafr|IDBG-194111|ENSMUSG00000056529|19204|; Sp100|IDBG-175861|ENSMUSG00000026222|101055663,20684|;
Lysosome	4357	KEGG	10	123	4.47058e-07	8.2096e-06	Atp6v0a1; Cd68; Ctss; Dnase2a; Gm2a; Gns; Lamp3; Lgmn; Man2b1; Napsa;	Atp6v0a1|IDBG-211715|ENSMUSG00000019302|11975|; Cd68|IDBG-191443|ENSMUSG00000018774|12514|; Ctss|IDBG-172850|ENSMUSG00000038642|13040|; Dnase2a|IDBG-175257|ENSMUSG00000003812|13423|; Gm2a|IDBG-174816|ENSMUSG00000000594|14667|; Gns|IDBG-192814|ENSMUSG00000034707|75612|; Lamp3|IDBG-143153|ENSMUSG00000041247|239739|; Lgmn|IDBG-165744|ENSMUSG00000021190|19141|; Man2b1|IDBG-176836|ENSMUSG00000005142|1…
Cell adhesion molecules (CAMs)	635	KEGG	11	154	4.26423e-07	8.61375e-06	H2-Ab1; H2-DMa; H2-DMb1; H2-DMb2; H2-Eb1; H2-Oa; Icam1; Itgam; Itgb2; Itgb7; Ptprc;	H2-Ab1|IDBG-170861|ENSMUSG00000073421|14961|; H2-DMa|IDBG-170449|ENSMUSG00000037649|14998|; H2-DMb1|IDBG-252191|ENSMUSG00000079547|14999|; H2-DMb2|IDBG-170493|ENSMUSG00000037548|15000|; H2-Eb1|IDBG-171115|ENSMUSG00000060586|14969|; H2-Oa|IDBG-170180|ENSMUSG00000024334|15001|; Icam1|IDBG-138668|ENSMUSG00000037405|15894|; Itgam|IDBG-210531|ENSMUSG00000030786|16409|; Itgb2|IDBG-167243|ENSMUSG0000000…
Graft-versus-host disease	2802	KEGG	7	50	6.54826e-07	1.10229e-05	H2-Ab1; H2-DMa; H2-DMb1; H2-DMb2; H2-Eb1; H2-Oa; Il1b;	H2-Ab1|IDBG-170861|ENSMUSG00000073421|14961|; H2-DMa|IDBG-170449|ENSMUSG00000037649|14998|; H2-DMb1|IDBG-252191|ENSMUSG00000079547|14999|; H2-DMb2|IDBG-170493|ENSMUSG00000037548|15000|; H2-Eb1|IDBG-171115|ENSMUSG00000060586|14969|; H2-Oa|IDBG-170180|ENSMUSG00000024334|15001|; Il1b|IDBG-205936|ENSMUSG00000027398|16176|;
Type I diabetes mellitus	637	KEGG	7	55	1.2763e-06	1.98317e-05	H2-Ab1; H2-DMa; H2-DMb1; H2-DMb2; H2-Eb1; H2-Oa; Il1b;	H2-Ab1|IDBG-170861|ENSMUSG00000073421|14961|; H2-DMa|IDBG-170449|ENSMUSG00000037649|14998|; H2-DMb1|IDBG-252191|ENSMUSG00000079547|14999|; H2-DMb2|IDBG-170493|ENSMUSG00000037548|15000|; H2-Eb1|IDBG-171115|ENSMUSG00000060586|14969|; H2-Oa|IDBG-170180|ENSMUSG00000024334|15001|; Il1b|IDBG-205936|ENSMUSG00000027398|16176|;
Toxoplasmosis	10393	KEGG	9	113	2.07482e-06	2.99367e-05	Ciita; H2-Ab1; H2-DMa; H2-DMb1; H2-DMb2; H2-Eb1; H2-Oa; Tgfb1; Tlr2;	Ciita|IDBG-132343|ENSMUSG00000022504|12265|; H2-Ab1|IDBG-170861|ENSMUSG00000073421|14961|; H2-DMa|IDBG-170449|ENSMUSG00000037649|14998|; H2-DMb1|IDBG-252191|ENSMUSG00000079547|14999|; H2-DMb2|IDBG-170493|ENSMUSG00000037548|15000|; H2-Eb1|IDBG-171115|ENSMUSG00000060586|14969|; H2-Oa|IDBG-170180|ENSMUSG00000024334|15001|; Tgfb1|IDBG-158292|ENSMUSG00000002603|21803|; Tlr2|IDBG-154818|ENSMUSG00000027…
Cytokine Signaling in Immune system	17370	REACTOME	11	194	4.18133e-06	5.63085e-05	Ciita; Csf2rb; Csf2rb2; H2-Ab1; Icam1; Il1b; Lyn; Oas2; Oasl1; Ptafr; Sp100;	Ciita|IDBG-132343|ENSMUSG00000022504|12265|; Csf2rb|IDBG-158959|ENSMUSG00000071713|12983|; Csf2rb2|IDBG-158858|ENSMUSG00000071714|12984|; H2-Ab1|IDBG-170861|ENSMUSG00000073421|14961|; Icam1|IDBG-138668|ENSMUSG00000037405|15894|; Il1b|IDBG-205936|ENSMUSG00000027398|16176|; Lyn|IDBG-128365|ENSMUSG00000042228|17096,666513|; Oas2|IDBG-196257|ENSMUSG00000032690|246728|; Oasl1|IDBG-193110|ENSMUSG000000…
Malaria	10373	KEGG	6	47	7.50205e-06	9.47133e-05	Icam1; Il1b; Itgb2; Tgfb1; Tlr2; Tlr9;	Icam1|IDBG-138668|ENSMUSG00000037405|15894|; Il1b|IDBG-205936|ENSMUSG00000027398|16176|; Itgb2|IDBG-167243|ENSMUSG00000000290|16414|; Tgfb1|IDBG-158292|ENSMUSG00000002603|21803|; Tlr2|IDBG-154818|ENSMUSG00000027995|24088|; Tlr9|IDBG-195818|ENSMUSG00000045322|81897|;
Allograft rejection	2794	KEGG	6	48	8.50366e-06	9.54299e-05	H2-Ab1; H2-DMa; H2-DMb1; H2-DMb2; H2-Eb1; H2-Oa;	H2-Ab1|IDBG-170861|ENSMUSG00000073421|14961|; H2-DMa|IDBG-170449|ENSMUSG00000037649|14998|; H2-DMb1|IDBG-252191|ENSMUSG00000079547|14999|; H2-DMb2|IDBG-170493|ENSMUSG00000037548|15000|; H2-Eb1|IDBG-171115|ENSMUSG00000060586|14969|; H2-Oa|IDBG-170180|ENSMUSG00000024334|15001|;
Interferon Signaling	18616	REACTOME	7	72	8.04673e-06	9.56141e-05	Ciita; H2-Ab1; Icam1; Oas2; Oasl1; Ptafr; Sp100;	Ciita|IDBG-132343|ENSMUSG00000022504|12265|; H2-Ab1|IDBG-170861|ENSMUSG00000073421|14961|; Icam1|IDBG-138668|ENSMUSG00000037405|15894|; Oas2|IDBG-196257|ENSMUSG00000032690|246728|; Oasl1|IDBG-193110|ENSMUSG00000041827|231655|; Ptafr|IDBG-194111|ENSMUSG00000056529|19204|; Sp100|IDBG-175861|ENSMUSG00000026222|101055663,20684|;
Autoimmune thyroid disease	2816	KEGG	6	62	3.79763e-05	0.000403748	H2-Ab1; H2-DMa; H2-DMb1; H2-DMb2; H2-Eb1; H2-Oa;	H2-Ab1|IDBG-170861|ENSMUSG00000073421|14961|; H2-DMa|IDBG-170449|ENSMUSG00000037649|14998|; H2-DMb1|IDBG-252191|ENSMUSG00000079547|14999|; H2-DMb2|IDBG-170493|ENSMUSG00000037548|15000|; H2-Eb1|IDBG-171115|ENSMUSG00000060586|14969|; H2-Oa|IDBG-170180|ENSMUSG00000024334|15001|;
GPVI-mediated activation cascade	18392	REACTOME	5	42	6.37593e-05	0.000643969	Csf2rb; Csf2rb2; Lcp2; Lyn; Rac2;	Csf2rb|IDBG-158959|ENSMUSG00000071713|12983|; Csf2rb2|IDBG-158858|ENSMUSG00000071714|12984|; Lcp2|IDBG-161461|ENSMUSG00000002699|16822|; Lyn|IDBG-128365|ENSMUSG00000042228|17096,666513|; Rac2|IDBG-159514|ENSMUSG00000033220|19354|;
Innate Immune System	16733	REACTOME	14	450	0.000176535	0.0016981	Card11; Cd180; Ctss; Fgf2; Hck; Itgam; Lcp2; Lgmn; Ly86; Lyn; Rasgrp1; Sirpa; Tlr9; Trex1;	Card11|IDBG-207118|ENSMUSG00000036526|108723|; Cd180|IDBG-179053|ENSMUSG00000021624|17079|; Ctss|IDBG-172850|ENSMUSG00000038642|13040|; Fgf2|IDBG-140464|ENSMUSG00000037225|14173|; Hck|IDBG-209984|ENSMUSG00000003283|15162|; Itgam|IDBG-210531|ENSMUSG00000030786|16409|; Lcp2|IDBG-161461|ENSMUSG00000002699|16822|; Lgmn|IDBG-165744|ENSMUSG00000021190|19141|; Ly86|IDBG-145270|ENSMUSG00000021423|17084|;…
Trafficking and processing of endosomal TLR	16858	REACTOME	3	12	0.000214188	0.00196663	Ctss; Lgmn; Tlr9;	Ctss|IDBG-172850|ENSMUSG00000038642|13040|; Lgmn|IDBG-165744|ENSMUSG00000021190|19141|; Tlr9|IDBG-195818|ENSMUSG00000045322|81897|;
Osteoclast differentiation	10372	KEGG	7	126	0.000294957	0.0025905	Fcgr3; Gm14548; Il1b; Lcp2; Pira2; Sirpa; Tgfb1;	Fcgr3|IDBG-204038|ENSMUSG00000059498|14131|; Gm14548|IDBG-136738|ENSMUSG00000074417|100038909,18722,18724,18727,18729,18730|; Il1b|IDBG-205936|ENSMUSG00000027398|16176|; Lcp2|IDBG-161461|ENSMUSG00000002699|16822|; Pira2|IDBG-486538|ENSMUSG00000089942|18725,18729|; Sirpa|IDBG-206000|ENSMUSG00000037902|19261|; Tgfb1|IDBG-158292|ENSMUSG00000002603|21803|;
Adaptive Immune System	19062	REACTOME	14	484	0.000373916	0.00314712	Card11; Ctss; Cul7; Fgf2; H2-Ab1; Icam1; Itgb7; Lcp2; Lgmn; Lyn; Pik3ap1; Ptprc; Rasgrp1; Tubb2b;	Card11|IDBG-207118|ENSMUSG00000036526|108723|; Ctss|IDBG-172850|ENSMUSG00000038642|13040|; Cul7|IDBG-187621|ENSMUSG00000038545|66515|; Fgf2|IDBG-140464|ENSMUSG00000037225|14173|; H2-Ab1|IDBG-170861|ENSMUSG00000073421|14961|; Icam1|IDBG-138668|ENSMUSG00000037405|15894|; Itgb7|IDBG-188077|ENSMUSG00000001281|16421|; Lcp2|IDBG-161461|ENSMUSG00000002699|16822|; Lgmn|IDBG-165744|ENSMUSG00000021190|1914…
Platelet activation, signaling and aggregation	17716	REACTOME	8	186	0.000613421	0.00495644	Csf2rb; Csf2rb2; Lcp2; Lyn; Rac2; Rasgrp1; Tgfb1; Tln1;	Csf2rb|IDBG-158959|ENSMUSG00000071713|12983|; Csf2rb2|IDBG-158858|ENSMUSG00000071714|12984|; Lcp2|IDBG-161461|ENSMUSG00000002699|16822|; Lyn|IDBG-128365|ENSMUSG00000042228|17096,666513|; Rac2|IDBG-159514|ENSMUSG00000033220|19354|; Rasgrp1|IDBG-197782|ENSMUSG00000027347|19419|; Tgfb1|IDBG-158292|ENSMUSG00000002603|21803|; Tln1|IDBG-141551|ENSMUSG00000028465|21894|;
Hemostasis	16941	REACTOME	12	407	0.000859789	0.00620276	Csf2rb; Csf2rb2; Itgam; Lcp2; Lyn; Rac2; Rasgrp1; Sh2b2; Sirpa; Tgfb1; Tln1; Tubb2b;	Csf2rb|IDBG-158959|ENSMUSG00000071713|12983|; Csf2rb2|IDBG-158858|ENSMUSG00000071714|12984|; Itgam|IDBG-210531|ENSMUSG00000030786|16409|; Lcp2|IDBG-161461|ENSMUSG00000002699|16822|; Lyn|IDBG-128365|ENSMUSG00000042228|17096,666513|; Rac2|IDBG-159514|ENSMUSG00000033220|19354|; Rasgrp1|IDBG-197782|ENSMUSG00000027347|19419|; Sh2b2|IDBG-204502|ENSMUSG00000005057|23921|; Sirpa|IDBG-206000|ENSMUSG000000…
Chemokine signaling pathway	4351	KEGG	8	195	0.000836656	0.00625943	Ccl22; Ccl3; Ccl6; Ccr1; Ccr7; Hck; Lyn; Rac2;	Ccl22|IDBG-182591|ENSMUSG00000031779|20299|; Ccl3|IDBG-205582|ENSMUSG00000000982|20302|; Ccl6|IDBG-205549|ENSMUSG00000018927|20305|; Ccr1|IDBG-206525|ENSMUSG00000025804|12768|; Ccr7|IDBG-210918|ENSMUSG00000037944|12775|; Hck|IDBG-209984|ENSMUSG00000003283|15162|; Lyn|IDBG-128365|ENSMUSG00000042228|17096,666513|; Rac2|IDBG-159514|ENSMUSG00000033220|19354|;
B cell receptor signaling pathway	790	KEGG	5	72	0.000823915	0.00640119	Card11; Lyn; Pik3ap1; Rac2; Rasgrp3;	Card11|IDBG-207118|ENSMUSG00000036526|108723|; Lyn|IDBG-128365|ENSMUSG00000042228|17096,666513|; Pik3ap1|IDBG-165835|ENSMUSG00000025017|83490|; Rac2|IDBG-159514|ENSMUSG00000033220|19354|; Rasgrp3|IDBG-198444|ENSMUSG00000071042|240168|;
MAPK signaling pathway	728	KEGG	9	253	0.00109402	0.00762045	Cacna1f; Dusp10; Dusp5; Fgf2; Il1b; Rac2; Rasgrp1; Rasgrp3; Tgfb1;	Cacna1f|IDBG-129059|ENSMUSG00000031142|54652|; Dusp10|IDBG-207813|ENSMUSG00000039384|63953|; Dusp5|IDBG-176683|ENSMUSG00000034765|240672|; Fgf2|IDBG-140464|ENSMUSG00000037225|14173|; Il1b|IDBG-205936|ENSMUSG00000027398|16176|; Rac2|IDBG-159514|ENSMUSG00000033220|19354|; Rasgrp1|IDBG-197782|ENSMUSG00000027347|19419|; Rasgrp3|IDBG-198444|ENSMUSG00000071042|240168|; Tgfb1|IDBG-158292|ENSMUSG00000002…
Cytokine-cytokine receptor interaction	604	KEGG	9	264	0.00147284	0.00991711	Ccl22; Ccl3; Ccl6; Ccr1; Ccr7; Csf2rb; Csf2rb2; Il1b; Tgfb1;	Ccl22|IDBG-182591|ENSMUSG00000031779|20299|; Ccl3|IDBG-205582|ENSMUSG00000000982|20302|; Ccl6|IDBG-205549|ENSMUSG00000018927|20305|; Ccr1|IDBG-206525|ENSMUSG00000025804|12768|; Ccr7|IDBG-210918|ENSMUSG00000037944|12775|; Csf2rb|IDBG-158959|ENSMUSG00000071713|12983|; Csf2rb2|IDBG-158858|ENSMUSG00000071714|12984|; Il1b|IDBG-205936|ENSMUSG00000027398|16176|; Tgfb1|IDBG-158292|ENSMUSG00000002603|2180…
TCR signaling	19711	REACTOME	4	52	0.00191869	0.0117447	Card11; H2-Ab1; Lcp2; Ptprc;	Card11|IDBG-207118|ENSMUSG00000036526|108723|; H2-Ab1|IDBG-170861|ENSMUSG00000073421|14961|; Lcp2|IDBG-161461|ENSMUSG00000002699|16822|; Ptprc|IDBG-195821|ENSMUSG00000026395|19264|;
Toll-Like Receptors Cascades	18742	REACTOME	6	127	0.00187729	0.0118504	Cd180; Ctss; Itgam; Lgmn; Ly86; Tlr9;	Cd180|IDBG-179053|ENSMUSG00000021624|17079|; Ctss|IDBG-172850|ENSMUSG00000038642|13040|; Itgam|IDBG-210531|ENSMUSG00000030786|16409|; Lgmn|IDBG-165744|ENSMUSG00000021190|19141|; Ly86|IDBG-145270|ENSMUSG00000021423|17084|; Tlr9|IDBG-195818|ENSMUSG00000045322|81897|;
Hematopoietic cell lineage	682	KEGG	5	86	0.00183321	0.0119455	H2-Eb1; Il1b; Itgam; Ms4a1; Siglech;	H2-Eb1|IDBG-171115|ENSMUSG00000060586|14969|; Il1b|IDBG-205936|ENSMUSG00000027398|16176|; Itgam|IDBG-210531|ENSMUSG00000030786|16409|; Ms4a1|IDBG-146027|ENSMUSG00000024673|12482|; Siglech|IDBG-188669|ENSMUSG00000051504|233274|;
Biosynthesis of unsaturated fatty acids	618	KEGG	3	25	0.0020335	0.0120814	Acot1; Acox3; Elovl5;	Acot1|IDBG-156004|ENSMUSG00000072949|26897|; Acox3|IDBG-157027|ENSMUSG00000029098|80911|; Elovl5|IDBG-186110|ENSMUSG00000032349|68801|;
FCERI mediated NF-kB activation	17306	REACTOME	3	27	0.00254814	0.0147064	Card11; Lyn; Rasgrp1;	Card11|IDBG-207118|ENSMUSG00000036526|108723|; Lyn|IDBG-128365|ENSMUSG00000042228|17096,666513|; Rasgrp1|IDBG-197782|ENSMUSG00000027347|19419|;
Systemic lupus erythematosus	2813	KEGG	6	139	0.00295762	0.0165955	H2-Ab1; H2-DMa; H2-DMb1; H2-DMb2; H2-Eb1; H2-Oa;	H2-Ab1|IDBG-170861|ENSMUSG00000073421|14961|; H2-DMa|IDBG-170449|ENSMUSG00000037649|14998|; H2-DMb1|IDBG-252191|ENSMUSG00000079547|14999|; H2-DMb2|IDBG-170493|ENSMUSG00000037548|15000|; H2-Eb1|IDBG-171115|ENSMUSG00000060586|14969|; H2-Oa|IDBG-170180|ENSMUSG00000024334|15001|;
Semaphorin interactions	19281	REACTOME	4	59	0.00305489	0.016678	Plxnc1; Ptprc; Rac2; Tln1;	Plxnc1|IDBG-186904|ENSMUSG00000074785|54712|; Ptprc|IDBG-195821|ENSMUSG00000026395|19264|; Rac2|IDBG-159514|ENSMUSG00000033220|19354|; Tln1|IDBG-141551|ENSMUSG00000028465|21894|;
Chagas disease (American trypanosomiasis)	10401	KEGG	5	104	0.00419245	0.0222862	Ccl3; Il1b; Tgfb1; Tlr2; Tlr9;	Ccl3|IDBG-205582|ENSMUSG00000000982|20302|; Il1b|IDBG-205936|ENSMUSG00000027398|16176|; Tgfb1|IDBG-158292|ENSMUSG00000002603|21803|; Tlr2|IDBG-154818|ENSMUSG00000027995|24088|; Tlr9|IDBG-195818|ENSMUSG00000045322|81897|;
African trypanosomiasis	10402	KEGG	3	33	0.00454727	0.0235525	Icam1; Il1b; Tlr9;	Icam1|IDBG-138668|ENSMUSG00000037405|15894|; Il1b|IDBG-205936|ENSMUSG00000027398|16176|; Tlr9|IDBG-195818|ENSMUSG00000045322|81897|;
Phosphorylation of CD3 and TCR zeta chains	17106	REACTOME	2	11	0.00537939	0.0265033	H2-Ab1; Ptprc;	H2-Ab1|IDBG-170861|ENSMUSG00000073421|14961|; Ptprc|IDBG-195821|ENSMUSG00000026395|19264|;
CD4 T cell receptor signaling	16105	INOH	4	69	0.00537004	0.0271187	Card11; H2-Ab1; Rac2; Rasgrp1;	Card11|IDBG-207118|ENSMUSG00000036526|108723|; H2-Ab1|IDBG-170861|ENSMUSG00000073421|14961|; Rac2|IDBG-159514|ENSMUSG00000033220|19354|; Rasgrp1|IDBG-197782|ENSMUSG00000027347|19419|;
FCGR activation	18177	REACTOME	2	12	0.00641243	0.0308407	Hck; Lyn;	Hck|IDBG-209984|ENSMUSG00000003283|15162|; Lyn|IDBG-128365|ENSMUSG00000042228|17096,666513|;
Amoebiasis	10368	KEGG	5	119	0.00738871	0.0347097	Il1b; Itgam; Itgb2; Tgfb1; Tlr2;	Il1b|IDBG-205936|ENSMUSG00000027398|16176|; Itgam|IDBG-210531|ENSMUSG00000030786|16409|; Itgb2|IDBG-167243|ENSMUSG00000000290|16414|; Tgfb1|IDBG-158292|ENSMUSG00000002603|21803|; Tlr2|IDBG-154818|ENSMUSG00000027995|24088|;
Developmental Biology	19101	REACTOME	10	409	0.00880788	0.0404362	Aph1c; Chd9; Fgf2; Lyn; Plxnc1; Ptprc; Rac2; Tgfb1; Tln1; Tubb2b;	Aph1c|IDBG-180033|ENSMUSG00000053040|68318|; Chd9|IDBG-179416|ENSMUSG00000056608|109151|; Fgf2|IDBG-140464|ENSMUSG00000037225|14173|; Lyn|IDBG-128365|ENSMUSG00000042228|17096,666513|; Plxnc1|IDBG-186904|ENSMUSG00000074785|54712|; Ptprc|IDBG-195821|ENSMUSG00000026395|19264|; Rac2|IDBG-159514|ENSMUSG00000033220|19354|; Tgfb1|IDBG-158292|ENSMUSG00000002603|21803|; Tln1|IDBG-141551|ENSMUSG00000028465…
MHC class II antigen presentation	18215	REACTOME	4	80	0.00902397	0.0405076	Ctss; H2-Ab1; Lgmn; Tubb2b;	Ctss|IDBG-172850|ENSMUSG00000038642|13040|; H2-Ab1|IDBG-170861|ENSMUSG00000073421|14961|; Lgmn|IDBG-165744|ENSMUSG00000021190|19141|; Tubb2b|IDBG-143968|ENSMUSG00000045136|73710|;
Regulation of KIT signaling	17223	REACTOME	2	15	0.0100002	0.0439137	Lyn; Sh2b2;	Lyn|IDBG-128365|ENSMUSG00000042228|17096,666513|; Sh2b2|IDBG-204502|ENSMUSG00000005057|23921|;
Hypertrophic cardiomyopathy (HCM)	4398	KEGG	4	84	0.0106748	0.0458791	Cacna1f; Itgb7; Tgfb1; Tpm4;	Cacna1f|IDBG-129059|ENSMUSG00000031142|54652|; Itgb7|IDBG-188077|ENSMUSG00000001281|16421|; Tgfb1|IDBG-158292|ENSMUSG00000002603|21803|; Tpm4|IDBG-167420|ENSMUSG00000031799|326618|;
Fc gamma R-mediated phagocytosis	4349	KEGG	4	86	0.0115689	0.0486856	Hck; Lyn; Ptprc; Rac2;	Hck|IDBG-209984|ENSMUSG00000003283|15162|; Lyn|IDBG-128365|ENSMUSG00000042228|17096,666513|; Ptprc|IDBG-195821|ENSMUSG00000026395|19264|; Rac2|IDBG-159514|ENSMUSG00000033220|19354|;
Dilated cardiomyopathy	5708	KEGG	4	89	0.0129981	0.053584	Cacna1f; Itgb7; Tgfb1; Tpm4;	Cacna1f|IDBG-129059|ENSMUSG00000031142|54652|; Itgb7|IDBG-188077|ENSMUSG00000001281|16421|; Tgfb1|IDBG-158292|ENSMUSG00000002603|21803|; Tpm4|IDBG-167420|ENSMUSG00000031799|326618|;
Signal Transduction	19426	REACTOME	24	1490	0.0132879	0.053683	Aph1c; Atp6v0a1; Ccl22; Ccl3; Ccl6; Ccr1; Ccr7; Csf2rb; Csf2rb2; Fgf2; Lyn; Pde4a; Plb1; Ptafr; Ptger4; Rac2; Rasgrp1; Rdh12; Sh2b2; Tagap; Tgfb1; Tln1; Tlr9; Tubb2b;	Aph1c|IDBG-180033|ENSMUSG00000053040|68318|; Atp6v0a1|IDBG-211715|ENSMUSG00000019302|11975|; Ccl22|IDBG-182591|ENSMUSG00000031779|20299|; Ccl3|IDBG-205582|ENSMUSG00000000982|20302|; Ccl6|IDBG-205549|ENSMUSG00000018927|20305|; Ccr1|IDBG-206525|ENSMUSG00000025804|12768|; Ccr7|IDBG-210918|ENSMUSG00000037944|12775|; Csf2rb|IDBG-158959|ENSMUSG00000071713|12983|; Csf2rb2|IDBG-158858|ENSMUSG00000071714|…
Other semaphorin interactions	19680	REACTOME	2	18	0.0142846	0.0554901	Plxnc1; Ptprc;	Plxnc1|IDBG-186904|ENSMUSG00000074785|54712|; Ptprc|IDBG-195821|ENSMUSG00000026395|19264|;
Smooth Muscle Contraction	17460	REACTOME	2	18	0.0142846	0.0554901	Tln1; Tpm4;	Tln1|IDBG-141551|ENSMUSG00000028465|21894|; Tpm4|IDBG-167420|ENSMUSG00000031799|326618|;
Fc epsilon receptor (FCERI) signaling	18703	REACTOME	5	146	0.0168469	0.0642089	Card11; Fgf2; Lcp2; Lyn; Rasgrp1;	Card11|IDBG-207118|ENSMUSG00000036526|108723|; Fgf2|IDBG-140464|ENSMUSG00000037225|14173|; Lcp2|IDBG-161461|ENSMUSG00000002699|16822|; Lyn|IDBG-128365|ENSMUSG00000042228|17096,666513|; Rasgrp1|IDBG-197782|ENSMUSG00000027347|19419|;
Glycosaminoglycan degradation	752	KEGG	2	21	0.019221	0.0693327	Gns; Hpse;	Gns|IDBG-192814|ENSMUSG00000034707|75612|; Hpse|IDBG-183400|ENSMUSG00000035273|15442|;
Syndecan interactions	16738	REACTOME	2	21	0.019221	0.0693327	Fgf2; Tgfb1;	Fgf2|IDBG-140464|ENSMUSG00000037225|14173|; Tgfb1|IDBG-158292|ENSMUSG00000002603|21803|;
Axon guidance	18680	REACTOME	7	268	0.0198002	0.070169	Aph1c; Lyn; Plxnc1; Ptprc; Rac2; Tln1; Tubb2b;	Aph1c|IDBG-180033|ENSMUSG00000053040|68318|; Lyn|IDBG-128365|ENSMUSG00000042228|17096,666513|; Plxnc1|IDBG-186904|ENSMUSG00000074785|54712|; Ptprc|IDBG-195821|ENSMUSG00000026395|19264|; Rac2|IDBG-159514|ENSMUSG00000033220|19354|; Tln1|IDBG-141551|ENSMUSG00000028465|21894|; Tubb2b|IDBG-143968|ENSMUSG00000045136|73710|;
Toll-like receptor signaling pathway	699	KEGG	4	100	0.019184	0.0717623	Ccl3; Il1b; Tlr2; Tlr9;	Ccl3|IDBG-205582|ENSMUSG00000000982|20302|; Il1b|IDBG-205936|ENSMUSG00000027398|16176|; Tlr2|IDBG-154818|ENSMUSG00000027995|24088|; Tlr9|IDBG-195818|ENSMUSG00000045322|81897|;
Generation of second messenger molecules	19597	REACTOME	2	22	0.0210038	0.0719115	H2-Ab1; Lcp2;	H2-Ab1|IDBG-170861|ENSMUSG00000073421|14961|; Lcp2|IDBG-161461|ENSMUSG00000002699|16822|;
Interleukin receptor SHC signaling	18490	REACTOME	2	22	0.0210038	0.0719115	Csf2rb; Csf2rb2;	Csf2rb|IDBG-158959|ENSMUSG00000071713|12983|; Csf2rb2|IDBG-158858|ENSMUSG00000071714|12984|;
Chemokine receptors bind chemokines	19018	REACTOME	3	58	0.0214134	0.0720919	Ccl22; Ccl3; Ccr7;	Ccl22|IDBG-182591|ENSMUSG00000031779|20299|; Ccl3|IDBG-205582|ENSMUSG00000000982|20302|; Ccr7|IDBG-210918|ENSMUSG00000037944|12775|;
Lysosome Vesicle Biogenesis	17687	REACTOME	2	23	0.0228529	0.0732743	Dnase2a; Gns;	Dnase2a|IDBG-175257|ENSMUSG00000003812|13423|; Gns|IDBG-192814|ENSMUSG00000034707|75612|;
T cell receptor signaling pathway	692	KEGG	4	105	0.0225078	0.0733318	Card11; Lcp2; Ptprc; Rasgrp1;	Card11|IDBG-207118|ENSMUSG00000036526|108723|; Lcp2|IDBG-161461|ENSMUSG00000002699|16822|; Ptprc|IDBG-195821|ENSMUSG00000026395|19264|; Rasgrp1|IDBG-197782|ENSMUSG00000027347|19419|;
Extracellular matrix organization	17713	REACTOME	6	216	0.0232355	0.0733372	Ctss; Fgf2; Icam1; Itgam; Itgb7; Tgfb1;	Ctss|IDBG-172850|ENSMUSG00000038642|13040|; Fgf2|IDBG-140464|ENSMUSG00000037225|14173|; Icam1|IDBG-138668|ENSMUSG00000037405|15894|; Itgam|IDBG-210531|ENSMUSG00000030786|16409|; Itgb7|IDBG-188077|ENSMUSG00000001281|16421|; Tgfb1|IDBG-158292|ENSMUSG00000002603|21803|;
Integrin cell surface interactions	18764	REACTOME	3	59	0.0223969	0.0741669	Icam1; Itgam; Itgb7;	Icam1|IDBG-138668|ENSMUSG00000037405|15894|; Itgam|IDBG-210531|ENSMUSG00000030786|16409|; Itgb7|IDBG-188077|ENSMUSG00000001281|16421|;
Fatty acid elongation	668	KEGG	2	24	0.0247665	0.0769667	Acot1; Elovl5;	Acot1|IDBG-156004|ENSMUSG00000072949|26897|; Elovl5|IDBG-186110|ENSMUSG00000032349|68801|;
G beta:gamma signalling through PI3Kgamma	19520	REACTOME	2	25	0.0267433	0.080629	Csf2rb; Csf2rb2;	Csf2rb|IDBG-158959|ENSMUSG00000071713|12983|; Csf2rb2|IDBG-158858|ENSMUSG00000071714|12984|;
alpha-Linolenic acid metabolism	742	KEGG	2	25	0.0267433	0.080629	Acox3; Plb1;	Acox3|IDBG-157027|ENSMUSG00000029098|80911|; Plb1|IDBG-150740|ENSMUSG00000029134|665270|;
Integrin alphaIIb beta3 signaling	19519	REACTOME	2	26	0.0287817	0.0854987	Rasgrp1; Tln1;	Rasgrp1|IDBG-197782|ENSMUSG00000027347|19419|; Tln1|IDBG-141551|ENSMUSG00000028465|21894|;
Natural killer cell mediated cytotoxicity	716	KEGG	4	114	0.0293309	0.0858672	Icam1; Itgb2; Lcp2; Rac2;	Icam1|IDBG-138668|ENSMUSG00000037405|15894|; Itgb2|IDBG-167243|ENSMUSG00000000290|16414|; Lcp2|IDBG-161461|ENSMUSG00000002699|16822|; Rac2|IDBG-159514|ENSMUSG00000033220|19354|;
Signaling by the B Cell Receptor (BCR)	16805	REACTOME	5	171	0.0308003	0.0888808	Card11; Fgf2; Lyn; Pik3ap1; Rasgrp1;	Card11|IDBG-207118|ENSMUSG00000036526|108723|; Fgf2|IDBG-140464|ENSMUSG00000037225|14173|; Lyn|IDBG-128365|ENSMUSG00000042228|17096,666513|; Pik3ap1|IDBG-165835|ENSMUSG00000025017|83490|; Rasgrp1|IDBG-197782|ENSMUSG00000027347|19419|;
G-protein beta:gamma signalling	19369	REACTOME	2	28	0.0330379	0.0939953	Csf2rb; Csf2rb2;	Csf2rb|IDBG-158959|ENSMUSG00000071713|12983|; Csf2rb2|IDBG-158858|ENSMUSG00000071714|12984|;
Fc epsilon RI signaling pathway	708	KEGG	3	69	0.0335685	0.0941783	Lcp2; Lyn; Rac2;	Lcp2|IDBG-161461|ENSMUSG00000002699|16822|; Lyn|IDBG-128365|ENSMUSG00000042228|17096,666513|; Rac2|IDBG-159514|ENSMUSG00000033220|19354|;
Leukocyte transendothelial migration	755	KEGG	4	122	0.0363241	0.100513	Icam1; Itgam; Itgb2; Rac2;	Icam1|IDBG-138668|ENSMUSG00000037405|15894|; Itgam|IDBG-210531|ENSMUSG00000030786|16409|; Itgb2|IDBG-167243|ENSMUSG00000000290|16414|; Rac2|IDBG-159514|ENSMUSG00000033220|19354|;
FCERI mediated Ca+2 mobilization	18706	REACTOME	2	31	0.0398495	0.108778	Lcp2; Lyn;	Lcp2|IDBG-161461|ENSMUSG00000002699|16822|; Lyn|IDBG-128365|ENSMUSG00000042228|17096,666513|;
Antigen activates B Cell Receptor (BCR) leading to generation of second messengers	16813	REACTOME	2	33	0.0446595	0.120283	Lyn; Pik3ap1;	Lyn|IDBG-128365|ENSMUSG00000042228|17096,666513|; Pik3ap1|IDBG-165835|ENSMUSG00000025017|83490|;
Integrin signaling pathway	16139	INOH	3	81	0.0501262	0.125006	Itgam; Itgb7; Tln1;	Itgam|IDBG-210531|ENSMUSG00000030786|16409|; Itgb7|IDBG-188077|ENSMUSG00000001281|16421|; Tln1|IDBG-141551|ENSMUSG00000028465|21894|;
Platelet Aggregation (Plug Formation)	19588	REACTOME	2	34	0.0471413	0.125297	Rasgrp1; Tln1;	Rasgrp1|IDBG-197782|ENSMUSG00000027347|19419|; Tln1|IDBG-141551|ENSMUSG00000028465|21894|;
Activation of gene expression by SREBF (SREBP)	17082	REACTOME	2	35	0.0496726	0.125423	Chd9; Cyp51;	Chd9|IDBG-179416|ENSMUSG00000056608|109151|; Cyp51|IDBG-132394|ENSMUSG00000001467|13121|;
Downstream TCR signaling	17143	REACTOME	2	35	0.0496726	0.125423	Card11; H2-Ab1;	Card11|IDBG-207118|ENSMUSG00000036526|108723|; H2-Ab1|IDBG-170861|ENSMUSG00000073421|14961|;
Primary immunodeficiency	2817	KEGG	2	35	0.0496726	0.125423	Ciita; Ptprc;	Ciita|IDBG-132343|ENSMUSG00000022504|12265|; Ptprc|IDBG-195821|ENSMUSG00000026395|19264|;
EPH-ephrin mediated repulsion of cells	18281	REACTOME	2	36	0.0522521	0.128719	Aph1c; Lyn;	Aph1c|IDBG-180033|ENSMUSG00000053040|68318|; Lyn|IDBG-128365|ENSMUSG00000042228|17096,666513|;
Cell surface interactions at the vascular wall	17646	REACTOME	3	83	0.0532095	0.129498	Itgam; Lyn; Sirpa;	Itgam|IDBG-210531|ENSMUSG00000030786|16409|; Lyn|IDBG-128365|ENSMUSG00000042228|17096,666513|; Sirpa|IDBG-206000|ENSMUSG00000037902|19261|;
Signaling by GPCR	17023	REACTOME	11	616	0.0493779	0.129537	Ccl22; Ccl3; Ccl6; Ccr1; Ccr7; Csf2rb; Csf2rb2; Pde4a; Ptafr; Ptger4; Rac2;	Ccl22|IDBG-182591|ENSMUSG00000031779|20299|; Ccl3|IDBG-205582|ENSMUSG00000000982|20302|; Ccl6|IDBG-205549|ENSMUSG00000018927|20305|; Ccr1|IDBG-206525|ENSMUSG00000025804|12768|; Ccr7|IDBG-210918|ENSMUSG00000037944|12775|; Csf2rb|IDBG-158959|ENSMUSG00000071713|12983|; Csf2rb2|IDBG-158858|ENSMUSG00000071714|12984|; Pde4a|IDBG-139354|ENSMUSG00000032177|18577|; Ptafr|IDBG-194111|ENSMUSG00000056529|192…
Apoptosis	759	KEGG	3	84	0.0547848	0.131745	Csf2rb; Csf2rb2; Il1b;	Csf2rb|IDBG-158959|ENSMUSG00000071713|12983|; Csf2rb2|IDBG-158858|ENSMUSG00000071714|12984|; Il1b|IDBG-205936|ENSMUSG00000027398|16176|;
FCERI mediated MAPK activation	19649	REACTOME	2	38	0.0575509	0.136768	Lcp2; Lyn;	Lcp2|IDBG-161461|ENSMUSG00000002699|16822|; Lyn|IDBG-128365|ENSMUSG00000042228|17096,666513|;
Interleukin-2 signaling	17042	REACTOME	2	39	0.0602679	0.139932	Csf2rb; Csf2rb2;	Csf2rb|IDBG-158959|ENSMUSG00000071713|12983|; Csf2rb2|IDBG-158858|ENSMUSG00000071714|12984|;
Interleukin-3, 5 and GM-CSF signaling	19407	REACTOME	2	39	0.0602679	0.139932	Csf2rb; Csf2rb2;	Csf2rb|IDBG-158959|ENSMUSG00000071713|12983|; Csf2rb2|IDBG-158858|ENSMUSG00000071714|12984|;
Class A/1 (Rhodopsin-like receptors)	17050	REACTOME	6	277	0.0644354	0.147909	Ccl22; Ccl3; Ccl6; Ccr7; Ptafr; Ptger4;	Ccl22|IDBG-182591|ENSMUSG00000031779|20299|; Ccl3|IDBG-205582|ENSMUSG00000000982|20302|; Ccl6|IDBG-205549|ENSMUSG00000018927|20305|; Ccr7|IDBG-210918|ENSMUSG00000037944|12775|; Ptafr|IDBG-194111|ENSMUSG00000056529|19204|; Ptger4|IDBG-128023|ENSMUSG00000039942|19219|;
XBP1(S) activates chaperone genes	19156	REACTOME	2	41	0.0658308	0.149414	Cul7; Tln1;	Cul7|IDBG-187621|ENSMUSG00000038545|66515|; Tln1|IDBG-141551|ENSMUSG00000028465|21894|;
Ether lipid metabolism	674	KEGG	2	42	0.0686746	0.150786	Pla2g7; Plb1;	Pla2g7|IDBG-184295|ENSMUSG00000023913|27226|; Plb1|IDBG-150740|ENSMUSG00000029134|665270|;
IRE1alpha activates chaperones	17973	REACTOME	2	42	0.0686746	0.150786	Cul7; Tln1;	Cul7|IDBG-187621|ENSMUSG00000038545|66515|; Tln1|IDBG-141551|ENSMUSG00000028465|21894|;
Muscle contraction	18180	REACTOME	2	42	0.0686746	0.150786	Tln1; Tpm4;	Tln1|IDBG-141551|ENSMUSG00000028465|21894|; Tpm4|IDBG-167420|ENSMUSG00000031799|326618|;
Regulation of actin cytoskeleton	724	KEGG	5	216	0.0705331	0.153201	Fgf2; Itgam; Itgb2; Itgb7; Rac2;	Fgf2|IDBG-140464|ENSMUSG00000037225|14173|; Itgam|IDBG-210531|ENSMUSG00000030786|16409|; Itgb2|IDBG-167243|ENSMUSG00000000290|16414|; Itgb7|IDBG-188077|ENSMUSG00000001281|16421|; Rac2|IDBG-159514|ENSMUSG00000033220|19354|;
Non-integrin membrane-ECM interactions	19127	REACTOME	2	43	0.0715584	0.153774	Fgf2; Tgfb1;	Fgf2|IDBG-140464|ENSMUSG00000037225|14173|; Tgfb1|IDBG-158292|ENSMUSG00000002603|21803|;
Immunoregulatory interactions between a Lymphoid and a non-Lymphoid cell	17324	REACTOME	2	45	0.0774417	0.16295	Icam1; Itgb7;	Icam1|IDBG-138668|ENSMUSG00000037405|15894|; Itgb7|IDBG-188077|ENSMUSG00000001281|16421|;
Regulation of cholesterol biosynthesis by SREBP (SREBF)	17083	REACTOME	2	45	0.0774417	0.16295	Chd9; Cyp51;	Chd9|IDBG-179416|ENSMUSG00000056608|109151|; Cyp51|IDBG-132394|ENSMUSG00000001467|13121|;
Signaling by Interleukins	18761	REACTOME	3	100	0.0829095	0.172657	Csf2rb; Csf2rb2; Il1b;	Csf2rb|IDBG-158959|ENSMUSG00000071713|12983|; Csf2rb2|IDBG-158858|ENSMUSG00000071714|12984|; Il1b|IDBG-205936|ENSMUSG00000027398|16176|;
GPCR downstream signaling	16814	REACTOME	9	524	0.0873875	0.180125	Ccl6; Ccr1; Ccr7; Csf2rb; Csf2rb2; Pde4a; Ptafr; Ptger4; Rac2;	Ccl6|IDBG-205549|ENSMUSG00000018927|20305|; Ccr1|IDBG-206525|ENSMUSG00000025804|12768|; Ccr7|IDBG-210918|ENSMUSG00000037944|12775|; Csf2rb|IDBG-158959|ENSMUSG00000071713|12983|; Csf2rb2|IDBG-158858|ENSMUSG00000071714|12984|; Pde4a|IDBG-139354|ENSMUSG00000032177|18577|; Ptafr|IDBG-194111|ENSMUSG00000056529|19204|; Ptger4|IDBG-128023|ENSMUSG00000039942|19219|; Rac2|IDBG-159514|ENSMUSG00000033220|19…
Costimulation by the CD28 family	18551	REACTOME	2	49	0.0896416	0.182905	H2-Ab1; Lyn;	H2-Ab1|IDBG-170861|ENSMUSG00000073421|14961|; Lyn|IDBG-128365|ENSMUSG00000042228|17096,666513|;
Signaling by Insulin receptor	17037	REACTOME	3	104	0.0907493	0.183314	Atp6v0a1; Fgf2; Tlr9;	Atp6v0a1|IDBG-211715|ENSMUSG00000019302|11975|; Fgf2|IDBG-140464|ENSMUSG00000037225|14173|; Tlr9|IDBG-195818|ENSMUSG00000045322|81897|;
Membrane Trafficking	17132	REACTOME	4	173	0.101453	0.200916	Dnase2a; Gns; Tonsl; Tubb2b;	Dnase2a|IDBG-175257|ENSMUSG00000003812|13423|; Gns|IDBG-192814|ENSMUSG00000034707|75612|; Tonsl|IDBG-156338|ENSMUSG00000059323|66914,72749|; Tubb2b|IDBG-143968|ENSMUSG00000045136|73710|;
Toll Like Receptor 4 (TLR4) Cascade	19911	REACTOME	3	109	0.100967	0.201935	Cd180; Itgam; Ly86;	Cd180|IDBG-179053|ENSMUSG00000021624|17079|; Itgam|IDBG-210531|ENSMUSG00000030786|16409|; Ly86|IDBG-145270|ENSMUSG00000021423|17084|;
Signaling by SCF-KIT	17280	REACTOME	3	112	0.107311	0.210455	Fgf2; Lyn; Sh2b2;	Fgf2|IDBG-140464|ENSMUSG00000037225|14173|; Lyn|IDBG-128365|ENSMUSG00000042228|17096,666513|; Sh2b2|IDBG-204502|ENSMUSG00000005057|23921|;
Clathrin derived vesicle budding	19013	REACTOME	2	56	0.112215	0.21588	Dnase2a; Gns;	Dnase2a|IDBG-175257|ENSMUSG00000003812|13423|; Gns|IDBG-192814|ENSMUSG00000034707|75612|;
trans-Golgi Network Vesicle Budding	18801	REACTOME	2	56	0.112215	0.21588	Dnase2a; Gns;	Dnase2a|IDBG-175257|ENSMUSG00000003812|13423|; Gns|IDBG-192814|ENSMUSG00000034707|75612|;
Peptide ligand-binding receptors	18683	REACTOME	4	181	0.114695	0.21857	Ccl22; Ccl3; Ccl6; Ccr7;	Ccl22|IDBG-182591|ENSMUSG00000031779|20299|; Ccl3|IDBG-205582|ENSMUSG00000000982|20302|; Ccl6|IDBG-205549|ENSMUSG00000018927|20305|; Ccr7|IDBG-210918|ENSMUSG00000037944|12775|;
Unfolded Protein Response (UPR)	17157	REACTOME	2	59	0.1223	0.230884	Cul7; Tln1;	Cul7|IDBG-187621|ENSMUSG00000038545|66515|; Tln1|IDBG-141551|ENSMUSG00000028465|21894|;
Cytosolic DNA-sensing pathway	8116	KEGG	2	61	0.129143	0.23933	Il1b; Trex1;	Il1b|IDBG-205936|ENSMUSG00000027398|16176|; Trex1|IDBG-201128|ENSMUSG00000049734|22040|;
PI3K Cascade	18655	REACTOME	2	61	0.129143	0.23933	Fgf2; Tlr9;	Fgf2|IDBG-140464|ENSMUSG00000037225|14173|; Tlr9|IDBG-195818|ENSMUSG00000045322|81897|;
Colorectal cancer	702	KEGG	2	65	0.143087	0.260393	Rac2; Tgfb1;	Rac2|IDBG-159514|ENSMUSG00000033220|19354|; Tgfb1|IDBG-158292|ENSMUSG00000002603|21803|;
Transcriptional regulation of white adipocyte differentiation	16682	REACTOME	2	65	0.143087	0.260393	Chd9; Tgfb1;	Chd9|IDBG-179416|ENSMUSG00000056608|109151|; Tgfb1|IDBG-158292|ENSMUSG00000002603|21803|;
Pancreatic cancer	795	KEGG	2	66	0.146622	0.264444	Rac2; Tgfb1;	Rac2|IDBG-159514|ENSMUSG00000033220|19354|; Tgfb1|IDBG-158292|ENSMUSG00000002603|21803|;
Axon guidance	612	KEGG	3	130	0.148377	0.265241	Plxnb2; Plxnc1; Rac2;	Plxnb2|IDBG-172822|ENSMUSG00000036606|140570|; Plxnc1|IDBG-186904|ENSMUSG00000074785|54712|; Rac2|IDBG-159514|ENSMUSG00000033220|19354|;
Fcgamma receptor (FCGR) dependent phagocytosis	18964	REACTOME	2	67	0.150176	0.266101	Hck; Lyn;	Hck|IDBG-209984|ENSMUSG00000003283|15162|; Lyn|IDBG-128365|ENSMUSG00000042228|17096,666513|;
p53 signaling pathway	666	KEGG	2	68	0.153746	0.270059	Cd82; Shisa5;	Cd82|IDBG-192552|ENSMUSG00000027215|12521|; Shisa5|IDBG-201052|ENSMUSG00000025647|66940|;
Metabolism of lipids and lipoproteins	17812	REACTOME	8	519	0.161573	0.28136	Acox3; Chd9; Cyp51; Elovl5; Gm2a; Lgmn; Plb1; Ptdss2;	Acox3|IDBG-157027|ENSMUSG00000029098|80911|; Chd9|IDBG-179416|ENSMUSG00000056608|109151|; Cyp51|IDBG-132394|ENSMUSG00000001467|13121|; Elovl5|IDBG-186110|ENSMUSG00000032349|68801|; Gm2a|IDBG-174816|ENSMUSG00000000594|14667|; Lgmn|IDBG-165744|ENSMUSG00000021190|19141|; Plb1|IDBG-150740|ENSMUSG00000029134|665270|; Ptdss2|IDBG-212007|ENSMUSG00000025495|27388|;
EPH-Ephrin signaling	18408	REACTOME	2	72	0.168189	0.287917	Aph1c; Lyn;	Aph1c|IDBG-180033|ENSMUSG00000053040|68318|; Lyn|IDBG-128365|ENSMUSG00000042228|17096,666513|;
DAP12 interactions	19893	REACTOME	3	138	0.168059	0.290154	Fgf2; Lcp2; Sirpa;	Fgf2|IDBG-140464|ENSMUSG00000037225|14173|; Lcp2|IDBG-161461|ENSMUSG00000002699|16822|; Sirpa|IDBG-206000|ENSMUSG00000037902|19261|;
Arrhythmogenic right ventricular cardiomyopathy (ARVC)	4368	KEGG	2	74	0.175497	0.292978	Cacna1f; Itgb7;	Cacna1f|IDBG-129059|ENSMUSG00000031142|54652|; Itgb7|IDBG-188077|ENSMUSG00000001281|16421|;
IRS-mediated signalling	19299	REACTOME	2	74	0.175497	0.292978	Fgf2; Tlr9;	Fgf2|IDBG-140464|ENSMUSG00000037225|14173|; Tlr9|IDBG-195818|ENSMUSG00000045322|81897|;
Platelet degranulation	16641	REACTOME	2	74	0.175497	0.292978	Tgfb1; Tln1;	Tgfb1|IDBG-158292|ENSMUSG00000002603|21803|; Tln1|IDBG-141551|ENSMUSG00000028465|21894|;
Diseases associated with visual transduction	19427	REACTOME	2	75	0.17917	0.294247	Plb1; Rdh12;	Plb1|IDBG-150740|ENSMUSG00000029134|665270|; Rdh12|IDBG-152851|ENSMUSG00000021123|77974|;
Visual phototransduction	19178	REACTOME	2	75	0.17917	0.294247	Plb1; Rdh12;	Plb1|IDBG-150740|ENSMUSG00000029134|665270|; Rdh12|IDBG-152851|ENSMUSG00000021123|77974|;
Downstream signaling events of B Cell Receptor (BCR)	19848	REACTOME	3	144	0.183299	0.2986	Card11; Fgf2; Rasgrp1;	Card11|IDBG-207118|ENSMUSG00000036526|108723|; Fgf2|IDBG-140464|ENSMUSG00000037225|14173|; Rasgrp1|IDBG-197782|ENSMUSG00000027347|19419|;
IRS-related events	19250	REACTOME	2	78	0.190259	0.300253	Fgf2; Tlr9;	Fgf2|IDBG-140464|ENSMUSG00000037225|14173|; Tlr9|IDBG-195818|ENSMUSG00000045322|81897|;
IRS-related events triggered by IGF1R	18469	REACTOME	2	78	0.190259	0.300253	Fgf2; Tlr9;	Fgf2|IDBG-140464|ENSMUSG00000037225|14173|; Tlr9|IDBG-195818|ENSMUSG00000045322|81897|;
Response to elevated platelet cytosolic Ca2+	19315	REACTOME	2	78	0.190259	0.300253	Tgfb1; Tln1;	Tgfb1|IDBG-158292|ENSMUSG00000002603|21803|; Tln1|IDBG-141551|ENSMUSG00000028465|21894|;
GPCR ligand binding	18571	REACTOME	6	379	0.192317	0.301147	Ccl22; Ccl3; Ccl6; Ccr7; Ptafr; Ptger4;	Ccl22|IDBG-182591|ENSMUSG00000031779|20299|; Ccl3|IDBG-205582|ENSMUSG00000000982|20302|; Ccl6|IDBG-205549|ENSMUSG00000018927|20305|; Ccr7|IDBG-210918|ENSMUSG00000037944|12775|; Ptafr|IDBG-194111|ENSMUSG00000056529|19204|; Ptger4|IDBG-128023|ENSMUSG00000039942|19219|;
Cardiac muscle contraction	4354	KEGG	2	79	0.193977	0.30141	Cacna1f; Tpm4;	Cacna1f|IDBG-129059|ENSMUSG00000031142|54652|; Tpm4|IDBG-167420|ENSMUSG00000031799|326618|;
Glycerophospholipid biosynthesis	19211	REACTOME	2	77	0.186552	0.301468	Plb1; Ptdss2;	Plb1|IDBG-150740|ENSMUSG00000029134|665270|; Ptdss2|IDBG-212007|ENSMUSG00000025495|27388|;
IGF1R signaling cascade	18472	REACTOME	2	81	0.20144	0.308264	Fgf2; Tlr9;	Fgf2|IDBG-140464|ENSMUSG00000037225|14173|; Tlr9|IDBG-195818|ENSMUSG00000045322|81897|;
Signaling by Type 1 Insulin-like Growth Factor 1 Receptor (IGF1R)	18473	REACTOME	2	81	0.20144	0.308264	Fgf2; Tlr9;	Fgf2|IDBG-140464|ENSMUSG00000037225|14173|; Tlr9|IDBG-195818|ENSMUSG00000045322|81897|;
Insulin receptor signalling cascade	18398	REACTOME	2	82	0.205185	0.311634	Fgf2; Tlr9;	Fgf2|IDBG-140464|ENSMUSG00000037225|14173|; Tlr9|IDBG-195818|ENSMUSG00000045322|81897|;
Role of LAT2/NTAL/LAB on calcium mobilization	18625	REACTOME	2	84	0.212697	0.320633	Fgf2; Lyn;	Fgf2|IDBG-140464|ENSMUSG00000037225|14173|; Lyn|IDBG-128365|ENSMUSG00000042228|17096,666513|;
Orphan transporters	17390	REACTOME	2	85	0.216464	0.323894	Chd9; Tubb2b;	Chd9|IDBG-179416|ENSMUSG00000056608|109151|; Tubb2b|IDBG-143968|ENSMUSG00000045136|73710|;
G alpha (s) signalling events	16694	REACTOME	2	89	0.231588	0.343976	Pde4a; Ptger4;	Pde4a|IDBG-139354|ENSMUSG00000032177|18577|; Ptger4|IDBG-128023|ENSMUSG00000039942|19219|;
Glycerophospholipid metabolism	622	KEGG	2	91	0.239177	0.352656	Plb1; Ptdss2;	Plb1|IDBG-150740|ENSMUSG00000029134|665270|; Ptdss2|IDBG-212007|ENSMUSG00000025495|27388|;
Defective B3GAT3 causes JDSSDHD	17861	REACTOME	2	106	0.296283	0.358378	Gns; Hpse;	Gns|IDBG-192814|ENSMUSG00000034707|75612|; Hpse|IDBG-183400|ENSMUSG00000035273|15442|;
Defective B4GALT1 causes B4GALT1-CDG (CDG-2d)	19245	REACTOME	2	106	0.296283	0.358378	Gns; Hpse;	Gns|IDBG-192814|ENSMUSG00000034707|75612|; Hpse|IDBG-183400|ENSMUSG00000035273|15442|;
Defective B4GALT7 causes EDS, progeroid type	17791	REACTOME	2	106	0.296283	0.358378	Gns; Hpse;	Gns|IDBG-192814|ENSMUSG00000034707|75612|; Hpse|IDBG-183400|ENSMUSG00000035273|15442|;
Defective CHST14 causes EDS, musculocontractural type	19017	REACTOME	2	106	0.296283	0.358378	Gns; Hpse;	Gns|IDBG-192814|ENSMUSG00000034707|75612|; Hpse|IDBG-183400|ENSMUSG00000035273|15442|;
Defective CHST3 causes SEDCJD	19031	REACTOME	2	106	0.296283	0.358378	Gns; Hpse;	Gns|IDBG-192814|ENSMUSG00000034707|75612|; Hpse|IDBG-183400|ENSMUSG00000035273|15442|;
Defective CHST6 causes MCDC1	19716	REACTOME	2	106	0.296283	0.358378	Gns; Hpse;	Gns|IDBG-192814|ENSMUSG00000034707|75612|; Hpse|IDBG-183400|ENSMUSG00000035273|15442|;
Defective CHSY1 causes TPBS	17859	REACTOME	2	106	0.296283	0.358378	Gns; Hpse;	Gns|IDBG-192814|ENSMUSG00000034707|75612|; Hpse|IDBG-183400|ENSMUSG00000035273|15442|;
Defective EXT1 causes exostoses 1, TRPS2 and CHDS	19490	REACTOME	2	106	0.296283	0.358378	Gns; Hpse;	Gns|IDBG-192814|ENSMUSG00000034707|75612|; Hpse|IDBG-183400|ENSMUSG00000035273|15442|;
Defective EXT2 causes exostoses 2	19903	REACTOME	2	106	0.296283	0.358378	Gns; Hpse;	Gns|IDBG-192814|ENSMUSG00000034707|75612|; Hpse|IDBG-183400|ENSMUSG00000035273|15442|;
Defective PAPSS2 causes SEMD-PA	19463	REACTOME	2	106	0.296283	0.358378	Gns; Hpse;	Gns|IDBG-192814|ENSMUSG00000034707|75612|; Hpse|IDBG-183400|ENSMUSG00000035273|15442|;
Defective SLC26A2 causes chondrodysplasias	19918	REACTOME	2	106	0.296283	0.358378	Gns; Hpse;	Gns|IDBG-192814|ENSMUSG00000034707|75612|; Hpse|IDBG-183400|ENSMUSG00000035273|15442|;
Diseases associated with glycosaminoglycan metabolism	17949	REACTOME	2	106	0.296283	0.358378	Gns; Hpse;	Gns|IDBG-192814|ENSMUSG00000034707|75612|; Hpse|IDBG-183400|ENSMUSG00000035273|15442|;
Diseases of glycosylation	17808	REACTOME	2	106	0.296283	0.358378	Gns; Hpse;	Gns|IDBG-192814|ENSMUSG00000034707|75612|; Hpse|IDBG-183400|ENSMUSG00000035273|15442|;
Glycosaminoglycan metabolism	16666	REACTOME	2	106	0.296283	0.358378	Gns; Hpse;	Gns|IDBG-192814|ENSMUSG00000034707|75612|; Hpse|IDBG-183400|ENSMUSG00000035273|15442|;
MPS I - Hurler syndrome	17707	REACTOME	2	106	0.296283	0.358378	Gns; Hpse;	Gns|IDBG-192814|ENSMUSG00000034707|75612|; Hpse|IDBG-183400|ENSMUSG00000035273|15442|;
MPS II - Hunter syndrome	17928	REACTOME	2	106	0.296283	0.358378	Gns; Hpse;	Gns|IDBG-192814|ENSMUSG00000034707|75612|; Hpse|IDBG-183400|ENSMUSG00000035273|15442|;
MPS IIIA - Sanfilippo syndrome A	19358	REACTOME	2	106	0.296283	0.358378	Gns; Hpse;	Gns|IDBG-192814|ENSMUSG00000034707|75612|; Hpse|IDBG-183400|ENSMUSG00000035273|15442|;
MPS IIIB - Sanfilippo syndrome B	19355	REACTOME	2	106	0.296283	0.358378	Gns; Hpse;	Gns|IDBG-192814|ENSMUSG00000034707|75612|; Hpse|IDBG-183400|ENSMUSG00000035273|15442|;
MPS IIIC - Sanfilippo syndrome C	17652	REACTOME	2	106	0.296283	0.358378	Gns; Hpse;	Gns|IDBG-192814|ENSMUSG00000034707|75612|; Hpse|IDBG-183400|ENSMUSG00000035273|15442|;
MPS IIID - Sanfilippo syndrome D	17761	REACTOME	2	106	0.296283	0.358378	Gns; Hpse;	Gns|IDBG-192814|ENSMUSG00000034707|75612|; Hpse|IDBG-183400|ENSMUSG00000035273|15442|;
MPS IV - Morquio syndrome A	17376	REACTOME	2	106	0.296283	0.358378	Gns; Hpse;	Gns|IDBG-192814|ENSMUSG00000034707|75612|; Hpse|IDBG-183400|ENSMUSG00000035273|15442|;
MPS IV - Morquio syndrome B	17124	REACTOME	2	106	0.296283	0.358378	Gns; Hpse;	Gns|IDBG-192814|ENSMUSG00000034707|75612|; Hpse|IDBG-183400|ENSMUSG00000035273|15442|;
MPS IX - Natowicz syndrome	18442	REACTOME	2	106	0.296283	0.358378	Gns; Hpse;	Gns|IDBG-192814|ENSMUSG00000034707|75612|; Hpse|IDBG-183400|ENSMUSG00000035273|15442|;
MPS VI - Maroteaux-Lamy syndrome	19188	REACTOME	2	106	0.296283	0.358378	Gns; Hpse;	Gns|IDBG-192814|ENSMUSG00000034707|75612|; Hpse|IDBG-183400|ENSMUSG00000035273|15442|;
MPS VII - Sly syndrome	18978	REACTOME	2	106	0.296283	0.358378	Gns; Hpse;	Gns|IDBG-192814|ENSMUSG00000034707|75612|; Hpse|IDBG-183400|ENSMUSG00000035273|15442|;
Mucopolysaccharidoses	19617	REACTOME	2	106	0.296283	0.358378	Gns; Hpse;	Gns|IDBG-192814|ENSMUSG00000034707|75612|; Hpse|IDBG-183400|ENSMUSG00000035273|15442|;
Rho GTPase cycle	18718	REACTOME	2	106	0.296283	0.358378	Rac2; Tagap;	Rac2|IDBG-159514|ENSMUSG00000033220|19354|; Tagap|IDBG-135078|ENSMUSG00000033450|72536|;
Signaling by Rho GTPases	18142	REACTOME	2	106	0.296283	0.358378	Rac2; Tagap;	Rac2|IDBG-159514|ENSMUSG00000033220|19354|; Tagap|IDBG-135078|ENSMUSG00000033450|72536|;
Factors involved in megakaryocyte development and platelet production	18141	REACTOME	2	109	0.307671	0.369938	Sh2b2; Tubb2b;	Sh2b2|IDBG-204502|ENSMUSG00000005057|23921|; Tubb2b|IDBG-143968|ENSMUSG00000045136|73710|;
Alzheimer's disease	675	KEGG	3	172	0.258414	0.378258	Aph1c; Cacna1f; Il1b;	Aph1c|IDBG-180033|ENSMUSG00000053040|68318|; Cacna1f|IDBG-129059|ENSMUSG00000031142|54652|; Il1b|IDBG-205936|ENSMUSG00000027398|16176|;
Mitotic Prometaphase	18604	REACTOME	2	112	0.319026	0.381321	Mad2l1; Tubb2b;	Mad2l1|IDBG-153481|ENSMUSG00000029910|102641123,56150|; Tubb2b|IDBG-143968|ENSMUSG00000045136|73710|;
Phospholipid metabolism	19213	REACTOME	2	120	0.349079	0.414788	Plb1; Ptdss2;	Plb1|IDBG-150740|ENSMUSG00000029134|665270|; Ptdss2|IDBG-212007|ENSMUSG00000025495|27388|;
Focal adhesion	788	KEGG	3	207	0.356656	0.421313	Itgb7; Rac2; Tln1;	Itgb7|IDBG-188077|ENSMUSG00000001281|16421|; Rac2|IDBG-159514|ENSMUSG00000033220|19354|; Tln1|IDBG-141551|ENSMUSG00000028465|21894|;
Cell cycle	717	KEGG	2	123	0.360242	0.423075	Mad2l1; Tgfb1;	Mad2l1|IDBG-153481|ENSMUSG00000029910|102641123,56150|; Tgfb1|IDBG-158292|ENSMUSG00000002603|21803|;
Resolution of Sister Chromatid Cohesion	17085	REACTOME	2	105	0.292481	0.425045	Mad2l1; Tubb2b;	Mad2l1|IDBG-153481|ENSMUSG00000029910|102641123,56150|; Tubb2b|IDBG-143968|ENSMUSG00000045136|73710|;
G alpha (i) signalling events	18914	REACTOME	3	214	0.376307	0.439387	Ccl6; Ccr1; Ccr7;	Ccl6|IDBG-205549|ENSMUSG00000018927|20305|; Ccr1|IDBG-206525|ENSMUSG00000025804|12768|; Ccr7|IDBG-210918|ENSMUSG00000037944|12775|;
DAP12 signaling	19896	REACTOME	2	131	0.389661	0.452365	Fgf2; Lcp2;	Fgf2|IDBG-140464|ENSMUSG00000037225|14173|; Lcp2|IDBG-161461|ENSMUSG00000002699|16822|;
Endocytosis	4385	KEGG	3	225	0.406945	0.46973	Fam125b; Tgfb1; Tonsl;	Fam125b|IDBG-162818|ENSMUSG00000038740|72543|; Tgfb1|IDBG-158292|ENSMUSG00000002603|21803|; Tonsl|IDBG-156338|ENSMUSG00000059323|66914,72749|;
Signaling by ERBB4	17279	REACTOME	2	140	0.42204	0.484387	Aph1c; Fgf2;	Aph1c|IDBG-180033|ENSMUSG00000053040|68318|; Fgf2|IDBG-140464|ENSMUSG00000037225|14173|;
GPCR signaling	16219	INOH	3	243	0.456088	0.520507	Fgf2; Il1b; Tgfb1;	Fgf2|IDBG-140464|ENSMUSG00000037225|14173|; Il1b|IDBG-205936|ENSMUSG00000027398|16176|; Tgfb1|IDBG-158292|ENSMUSG00000002603|21803|;
Jak-STAT signaling pathway	651	KEGG	2	154	0.470623	0.534077	Csf2rb; Csf2rb2;	Csf2rb|IDBG-158959|ENSMUSG00000071713|12983|; Csf2rb2|IDBG-158858|ENSMUSG00000071714|12984|;
G alpha (q) signalling events	19293	REACTOME	2	156	0.477368	0.538705	Ccl6; Ptafr;	Ccl6|IDBG-205549|ENSMUSG00000018927|20305|; Ptafr|IDBG-194111|ENSMUSG00000056529|19204|;
Fatty acid, triacylglycerol, and ketone body metabolism	16965	REACTOME	2	165	0.507075	0.569051	Chd9; Elovl5;	Chd9|IDBG-179416|ENSMUSG00000056608|109151|; Elovl5|IDBG-186110|ENSMUSG00000032349|68801|;
Separation of Sister Chromatids	16986	REACTOME	2	167	0.513529	0.57311	Mad2l1; Tubb2b;	Mad2l1|IDBG-153481|ENSMUSG00000029910|102641123,56150|; Tubb2b|IDBG-143968|ENSMUSG00000045136|73710|;
Mitotic Anaphase	19723	REACTOME	2	173	0.532562	0.591085	Mad2l1; Tubb2b;	Mad2l1|IDBG-153481|ENSMUSG00000029910|102641123,56150|; Tubb2b|IDBG-143968|ENSMUSG00000045136|73710|;
Mitotic Metaphase and Anaphase	18597	REACTOME	2	174	0.535685	0.591302	Mad2l1; Tubb2b;	Mad2l1|IDBG-153481|ENSMUSG00000029910|102641123,56150|; Tubb2b|IDBG-143968|ENSMUSG00000045136|73710|;
Gastrin-CREB signalling pathway via PKC and MAPK	17282	REACTOME	2	180	0.554128	0.605048	Ccl6; Ptafr;	Ccl6|IDBG-205549|ENSMUSG00000018927|20305|; Ptafr|IDBG-194111|ENSMUSG00000056529|19204|;
Calcium signaling pathway	667	KEGG	2	181	0.557152	0.605079	Cacna1f; Ptafr;	Cacna1f|IDBG-129059|ENSMUSG00000031142|54652|; Ptafr|IDBG-194111|ENSMUSG00000056529|19204|;
Disease	16877	REACTOME	9	879	0.553126	0.607236	Aph1c; Atp6v0a1; Fgf2; Gns; Hpse; Pdxk; Plb1; Rdh12; Tgfb1;	Aph1c|IDBG-180033|ENSMUSG00000053040|68318|; Atp6v0a1|IDBG-211715|ENSMUSG00000019302|11975|; Fgf2|IDBG-140464|ENSMUSG00000037225|14173|; Gns|IDBG-192814|ENSMUSG00000034707|75612|; Hpse|IDBG-183400|ENSMUSG00000035273|15442|; Pdxk|IDBG-169129|ENSMUSG00000032788|216134|; Plb1|IDBG-150740|ENSMUSG00000029134|665270|; Rdh12|IDBG-152851|ENSMUSG00000021123|77974|; Tgfb1|IDBG-158292|ENSMUSG00000002603|218…
Metabolism of amino acids and derivatives	18120	REACTOME	2	183	0.563157	0.60833	Ckb; Suox;	Ckb|IDBG-173411|ENSMUSG00000001270|12709|; Suox|IDBG-198090|ENSMUSG00000049858|211389|;
JAK STAT pathway and regulation	16126	INOH	2	204	0.62272	0.665553	Csf2rb; Il1b;	Csf2rb|IDBG-158959|ENSMUSG00000071713|12983|; Il1b|IDBG-205936|ENSMUSG00000027398|16176|;
Class I MHC mediated antigen processing & presentation	16844	REACTOME	2	203	0.620029	0.666201	Ctss; Cul7;	Ctss|IDBG-172850|ENSMUSG00000038642|13040|; Cul7|IDBG-187621|ENSMUSG00000038545|66515|;
Pathways in cancer	4393	KEGG	3	322	0.646767	0.687615	Fgf2; Rac2; Tgfb1;	Fgf2|IDBG-140464|ENSMUSG00000037225|14173|; Rac2|IDBG-159514|ENSMUSG00000033220|19354|; Tgfb1|IDBG-158292|ENSMUSG00000002603|21803|;
Mus musculus biological processes	16801	REACTOME	2	218	0.658883	0.696829	Chd9; Tgfb1;	Chd9|IDBG-179416|ENSMUSG00000056608|109151|; Tgfb1|IDBG-158292|ENSMUSG00000002603|21803|;
Glycogen storage diseases	18944	REACTOME	2	228	0.683004	0.707522	Gns; Hpse;	Gns|IDBG-192814|ENSMUSG00000034707|75612|; Hpse|IDBG-183400|ENSMUSG00000035273|15442|;
Metabolism of carbohydrates	19819	REACTOME	2	228	0.683004	0.707522	Gns; Hpse;	Gns|IDBG-192814|ENSMUSG00000034707|75612|; Hpse|IDBG-183400|ENSMUSG00000035273|15442|;
Myoclonic epilepsy of Lafora	19721	REACTOME	2	228	0.683004	0.707522	Gns; Hpse;	Gns|IDBG-192814|ENSMUSG00000034707|75612|; Hpse|IDBG-183400|ENSMUSG00000035273|15442|;
Metabolism of proteins	17734	REACTOME	5	555	0.680404	0.715841	Cul7; Mgat1; Pla2g7; Tln1; Tubb2b;	Cul7|IDBG-187621|ENSMUSG00000038545|66515|; Mgat1|IDBG-166792|ENSMUSG00000020346|17308|; Pla2g7|IDBG-184295|ENSMUSG00000023913|27226|; Tln1|IDBG-141551|ENSMUSG00000028465|21894|; Tubb2b|IDBG-143968|ENSMUSG00000045136|73710|;
Metabolism	17674	REACTOME	13	1414	0.70943	0.731147	Acox3; Chd9; Ckb; Cyp51; Elovl5; Gm2a; Gns; Hpse; Lgmn; Pdxk; Plb1; Ptdss2; Suox;	Acox3|IDBG-157027|ENSMUSG00000029098|80911|; Chd9|IDBG-179416|ENSMUSG00000056608|109151|; Ckb|IDBG-173411|ENSMUSG00000001270|12709|; Cyp51|IDBG-132394|ENSMUSG00000001467|13121|; Elovl5|IDBG-186110|ENSMUSG00000032349|68801|; Gm2a|IDBG-174816|ENSMUSG00000000594|14667|; Gns|IDBG-192814|ENSMUSG00000034707|75612|; Hpse|IDBG-183400|ENSMUSG00000035273|15442|; Lgmn|IDBG-165744|ENSMUSG00000021190|19141|; …
Signalling by NGF	19028	REACTOME	2	251	0.733263	0.751874	Aph1c; Fgf2;	Aph1c|IDBG-180033|ENSMUSG00000053040|68318|; Fgf2|IDBG-140464|ENSMUSG00000037225|14173|;
M Phase	17726	REACTOME	2	273	0.774924	0.790579	Mad2l1; Tubb2b;	Mad2l1|IDBG-153481|ENSMUSG00000029910|102641123,56150|; Tubb2b|IDBG-143968|ENSMUSG00000045136|73710|;
Transmembrane transport of small molecules	18857	REACTOME	4	518	0.785715	0.79756	Atp6v0a1; Chd9; Slc28a2; Tubb2b;	Atp6v0a1|IDBG-211715|ENSMUSG00000019302|11975|; Chd9|IDBG-179416|ENSMUSG00000056608|109151|; Slc28a2|IDBG-203005|ENSMUSG00000027219|269346|; Tubb2b|IDBG-143968|ENSMUSG00000045136|73710|;
Neuroactive ligand-receptor interaction	720	KEGG	2	283	0.791933	0.799853	Ptafr; Ptger4;	Ptafr|IDBG-194111|ENSMUSG00000056529|19204|; Ptger4|IDBG-128023|ENSMUSG00000039942|19219|;
Cell Cycle, Mitotic	16819	REACTOME	2	423	0.935607	0.940262	Mad2l1; Tubb2b;	Mad2l1|IDBG-153481|ENSMUSG00000029910|102641123,56150|; Tubb2b|IDBG-143968|ENSMUSG00000045136|73710|;
Cell Cycle	17635	REACTOME	2	501	0.967999	0.967999	Mad2l1; Tubb2b;	Mad2l1|IDBG-153481|ENSMUSG00000029910|102641123,56150|; Tubb2b|IDBG-143968|ENSMUSG00000045136|73710|;
