# Supplementary material for: Senescence-associated lineage-aberrant plasticity evokes T-cell-mediated tumor control
Source: Nat Commun. 2025 Mar 31;16:3079. doi: 10.1038/s41467-025-57429-x (PMC11955568; doi:10.1038/s41467-025-57429-x)
Supplement: Supplementary file 8 — Supplementary Data 6 [file 41467_2025_57429_MOESM8_ESM.xlsx]

## Sheet: Data S6
Supplementary Data 6. Materials employed during this study.
Note that this file contains the following worksheets:
Worksheet	Description
A	Flow Cytometry reagents
B	Antibodies for Immunoblots
C	Taqman assays for qRT-PCR

## Sheet: S6A - Flow Cytometry
Antibodies for flow cytometry
Antigen, species reactivity	Dilution	Clone	Company	Catalog no.	Isotype	RRID
CD11b-Biotin, mouse	1:200	REA592	Miltenyi Biotec	130-109-362; 130-113-804	Recombinant human IgG1	AB_2654660, AB_2733498
CD11b-PE, mouse	1:100	M1/70	eBioscience	12-0112-82	Rat IgG2b, κ	AB_2734869
CD11c-Biotin, mouse	01:50:00	N418	Miltenyi Biotec	130-125-219	Hamster IgG	AB_2889434
CD115-Biotin, mouse	1:100	REA827	Miltenyi Biotec	130-112-826	Recombinant human IgG1	AB_2654560
CD134-Pe/Cy7, mouse	1:25	OX-86	BioLegend	119416	Rat IgG1, κ	AB_2566155
CD16/CD32-APC, mouse	1:10	93	Miltenyi Biotec	130-102-390	Rat IgG2aλ	AB_2660223
CD19-Alexa Fluor 647, mouse	1:100	6D5	BioLegend	115522	Rat IgG2aκ	AB_389329
CD19-PE, mouse	1:100	6D5	Miltenyi Biotec	130-123-272	Rat IgG2aκ	AB_2819465
CD274-PE, mouse	1:100	MIH5	eBioscience	12-5982-82	Rat / IgG2a, lambda	AB_466089
CD274-APC, mouse	1:100	MIH5	BD Pharmingen	564715	Rat / IgG2a, lambda	AB_2687479
CD3e-PE, mouse	1:100	145-2C11	eBioscience	12-0031-82	Armenian Hamster IgG	AB_465496
CD4-BV650, mouse	1:100	GK1.5	BioLegend	100469	Rat IgG2b, κ	AB_2783035
CD45R/B220-FITC, mouse and human	1:100	RA3-6B2	BD Pharmingen	553088	Rat IgG2aκ	AB_394618
CD45R/B220-PE, mouse and human	1:100	RA3-6B2	BD Pharmingen	553090	Rat IgG2aκ	AB_394620
CD69-APC, mouse	1:100	H1.2F3	BioLegend	104514	Armenian Hamster IgG	AB_492843
CD69-APC/Cy7, mouse	1:100	H1.2F3	BioLegend	104525	Armenian Hamster IgG	AB_10683447
CD8a-VioGreen, mouse	1:20	53-6.7	Miltenyi Biotec	130-102-409	Rat IgG2aκ	AB_2659891
CD86-APC, mouse	1:330	GL1	eBioscience	17-0862-82	Rat IgG2aκ	AB_469419
MHCI-APC, mouse	1:50	28-14-8	eBioscience	17-5999-82	Mouse / IgG2a, kappa	AB_2573252
MHC II-APC, mouse	1:160	M5/114.15.2	eBioscience	17-5321-82	Rat IgG2b, κ	AB_467561
CD11b-Biotin, human	1:50	REA713	Miltenyi Biotec	130-110-609	recombinant human IgG1	AB_2654678
CD11c-Biotin, human	1:50	REA618	Miltenyi Biotec	130-113-586	recombinant human IgG1	AB_2726186
CD19-PE, human	1:20	HIB19	BD Pharmingen	555413	Mouse IgG1k	AB_395813
CD20-PE, human	1:25	B9E9	BeckmanCoulter	IM1451	Mouse IgG2a	AB_131065
CD274-APC, human	1:20	MIH1	BD Pharmingen	563741	Mouse BALB/c IgG1, κ	AB_273839
CD86-FITC, human	1:50	FM95	Miltenyi Biotec	130-114-097	Mouse IgG1k	AB_2751198
Streptavidin-APC	1:100		Miltenyi Biotec	130-106-792
Streptavidin-PE	1:200		Miltenyi Biotec	130-106-790
FcR Blocking Reagent, human			Miltenyi Biotec	130-059-901		AB_2892112
FcR Blocking Reagent, mouse			Miltenyi Biotec	130-092-575		AB_2892833

## Sheet: S6B - Immunoblot
Antibodies SimpleWestern / Immunoblot
Antigen, source species	dilution in Western Blot, blocking Agent	dilution for Simple Western	clone	company	catalog no	RRID
β-Actin, Rabbit		1:50	13E5	Cell Signaling	4970	AB_2223172
C/EBPβ, Mouse IgG2a kappa	1:100, 2% milk	1:50	H-7	Santa Cruz	sc-7962	AB_626772
CSF-1R/M-CSF-R, Rabbit		1:25	polyclonal	Cell Signaling	3152	AB_2085233
Phospho-c-Jun (Ser63) II, Rabbit		1:50	polyclonal	Cell Signaling	9261	AB_2130162
c-Jun, Rabbit	1:1000, 5%BSA	1:50	60A8	Cell Signaling	9165	AB_2130165
JunD. Mouse IgG2B		1:50	512709	R&D systems	MAB5526-SP	B_2265202
Pax5/BSAP, Rabbit		1:50	1207C	R&D Systems	MAB3487-SP	AB_2927783
PU.1, Mouse IgG1 κ (for probing mouse cells)	1:100, 2% milk	1:50	C-3	Santa Cruz	sc-390405	AB_2889361
PU.1, Rabbit (for probing human cells)	1:1000, 5% BSA		polyclonal	Cell Signaling	2266	AB_10692379
TATA binding protein (TBP), Mouse IgG2a k		1:100	﻿mAbcam 51841	Abcam	ab51841	AB_94575
TATA binding protein (TBP), Rabbit	1:5000, 5% milk	1:100	EPR21954	Abcam	ab220788	AB_2927785
α-Tubulin, Mouse	1:10000, 5% milk		B-5-1-2	Sigma-Aldrich	T5168	AB_477579
HRP-linked AffiniPure Goat Anti-Mouse IgG (H+L)		1:100 (for anti-TBP,﻿ mAbcam 51841 detection)	polyclonal	Jackson ImmunoResearch	115-035-003	AB_1001528
HRP-linked Amersham Sheep Anti-Mouse F(ab')₂ fragment	1:2500		polyclonal	GE Healthcare	NA9310	AB_772193
HRP-linked Amersham Donkey Anti-Rabbit F(ab')₂ fragment	1:2500		polyclonal	GE Healthcare	NA9340	AB_772191
Anti-Rabbit Detection Module for Wes, Peggy Sue or Sally Sue				ProteinSimple	DM-001
Anti-Mouse Detection Module for Jess, Wes, Peggy Sue or Sally Sue				ProteinSimple	DM-002

## Sheet: S6C - Taqmans
Taqman assays for qRT-PCR
HUMAN
Gene	Assay ID (all by Applied Biosystems)	Location of assay, remarks
BACH2	Hs00935338_m1
CCL22	Hs01574247_m1
CCL3	Hs00234142_m1
CD19	Hs01047410_g1
CD44	Hs01075861_m1
CD86	Hs01567026_m1
CDKN1A	Hs00355782_m1
CDKN2A	Hs00923894_m1
CEBPA	Hs00269972_s1
CEBPB	Hs00942496_s1	outside of coding sequence (overexpression of ccds-cDNA not detectable)
CIITA	Hs00172106_m1
CSF1R	Hs00911250_m1
CSF2RB	Hs00166144_m1
CXCL10	Hs00171042_m1
FCGR2A	Hs00234969_m1
IL1B	Hs01555410_m1
IL6	Hs00174131_m1
ITGAX	Hs00174217_m1
JUN	Hs01103582_s1	outside of coding sequence (overexpression of ccds-cDNA not detectable)
LGALS3	Hs00173587_m1
LMNB1	Hs01059210_m1
MS4A1	Hs00544818_m1
MYC	Hs00153408_m1
NCF2	Hs01084940_m1
NFKBIA	Hs00153283_m1
PAX5	Hs00172003_m1
PCNA	Hs00427214_g1
PRDM1	Hs00153357_m1
RAC2	Hs00427439_g1
RPL19	Hs02338565_gH
TNFAIP3	Hs00234713_m1
ZEB2	Hs00207691_m1
MOUSE
Gene	Assay ID (all by Applied Biosystems)
Bach2	Mm00464379_m1
Blnk	Mm01197846_m1
C3	Mm01232779_m1
Ccl2	Mm00441242_m1
Ccr2	Mm00438270_m1
Cd19	Mm00515420_m1
Cd274	Mm00452054_m1
Cd68	Mm03047343_m1
Cd74	Mm00658576_m1
Cd86	Mm00444540_m1
Ciita	Mm00482914_m1
Csf1r	Mm01266652_m1
Csf2ra	Mm00438331_g1
Csf2rb	Mm00655745_m1
Csf2rb2	Mm00655763_m1
Ctss	Mm01255859_m1
Ebf1	Mm00432954_m1
Fcgr2b	Mm00438875_m1
Fcgr3	Mm00438882_m1
Gapdh	Mm99999915_g1
H2-Ab1	Mm00439216_m1
H2-Dma	Mm00439226_m1
H2-Eb1	Mm00439221_m1
Igll1	Mm01716144_m1
Ikzf1	Mm01187878_m1
Ikzf3	Mm01306721_m1
Il1b	Mm00434228_m1
Itgam	Mm00434455_m1
Itgax	Mm00498698_m1
Itgb2	Mm00434513_m1
Jun	Mm00495062_s1
Lgals3	Mm00802901_m1
Ly6a	Mm00726565_s1
Ms4a1	Mm00545909_m1
Myc	Mm00487804_m1
Pax5	Mm00435502_m1
Pdcd1lg2	Mm00451734_m1
Spi1	Mm00488142_m1
