# Supplementary material for: Senescence-associated lineage-aberrant plasticity evokes T-cell-mediated tumor control
Source: Nat Commun. 2025 Mar 31;16:3079. doi: 10.1038/s41467-025-57429-x (PMC11955568; doi:10.1038/s41467-025-57429-x)
Supplement: Supplementary file 9 — Supplementary Data 7 [file 41467_2025_57429_MOESM9_ESM.xlsx]

## Sheet: Data S7
Gene set name →	JUN_OIS_Martinez2020	CEBPB_OEKO_Huggins2013	PU1_Minderjahn2020	HAEMOPEDIA_Macrop_vs_B_UP_Mouse	HAEMOPEDIA_DC_vs_B_up_Mouse	HAEMOPEDIA_Neutro_vs_B_up_Mouse	HAEMOPEDIA_DC_vs_B_up_Mouse100	HaemoRNAseq_Macrop_vs_B_UP_Hum	HaemoRNAseq_DC_vs_B_UP_Human	HaemoRNAseq_Neutro_vs_B_UP_human	core_SUVARness_Schleich
Definition →	>genes that were downregulated by fold-change < -log2(1.5) and adj. Q < 0.10 by siJUN in OIS fibroblasts and were direct JUN targets as identified by ChIP-seq experiments. Martinez-Zamudio-RI et al., Nature Cell Biology, 2020.	>differentially regulated genes shared between C/EBPbeta overexpressing RasV12 3T3s (up) and Cebpb knockout RasV12 MEFs (down), excluding genes affected by Cebpg knockout (up), Huggins-CJ et al., Molecular Cell Biology, 2013.	>genes upregulated after PU.1 mRNA transfection in PU.1 negative human T-cell leukemia CTV-1 cell line, Minderjahn-J, Nature Communications, 2020	>all mouse genes that are significantly higher expressed in macrophages than B cells according to Haemosphere platform (by microarray)	>mouse genes that are significantly up in Dendritic vs B cells by log2FC >0.5 according to Haemosphere platform (by microarray)	>mouse genes that are significantly up in Neutrophils vs B cells by log2FC >1.5 according to Haemosphere platform (by microarray)	>Top 100 mouse genes up in Dendritic vs B cells by log2FC >0.5 according to Haemosphere platform (by microarray)	>human genes that are significantly up in Macrophages vs B cells by log2FC >2 according to Haemosphere platform (by RNA-seq)	>human genes that are significantly up in dendritic vs B cells by log2FC >2 according to Haemosphere platform (by RNA-seq)	>human genes that are significantly up in Neutrophils vs B cells by log2FC >2 according to Haemosphere platform (by RNA-seq)	>core SUVARness signature as in Schleich-K et al., Nature Communications, 2020.
Elements ↓	ABCA1	1190003J15RIK	CD84	MS4A6D	PAK1	CPEB2	PAK1	TNFRSF1A	TNFRSF1A	CCL4L2	FKBP9
	ABCG2	9930013L23RIK	GSN	TGFBI	CCL5	ITGB2L	CADM1	TMEM150B	TIFAB	CST7	F2R
	ABHD2	A130040M12RIK	PLAC8	CD300A	CADM1	IL1RN	OSBPL3	FCGR3A	PLXDC2	CNN2	FSTL1
	ABHD17C	ABCB1A	BTK	CSF1R	OSBPL3	RAB11FIP5	FNBP1L	TYROBP	AKAP13	ALPL	PLPP3
	ACPP	ACPP	GPR85	IL13RA1	FNBP1L	LYZ2	WDR86	OSCAR	TYROBP	ZNF467	NCKAP1
	ACSL5	AIM2	LPCAT2	NUPR1	WDR86	FAM217B	ARRDC4	CPVL	DOCK1	CLDN9	CTSC
	ACVRL1	AKR1B3	MYO1F	CLEC4A1	CD8A	MIRT2	NOSTRIN	ZNF467	OSCAR	NLRP9P	WLS
	ADAM12	AKR1C18	CTSS	MS4A8A	ARRDC4	CSF3R	RAB7B	CD93	CPVL	MBOAT7	PRRX1
	ADAMTS5	ARRDC4	CNR2	AI607873	KLRD1	JDP2	CPNE2	SECTM1	NAPSB	ANPEP	MMP9
	ADAMTS9	BCL2L15	CYSLTR1	MFSD7A	LYZ1	SFXN5	CTTNBP2NL	PTGES	RNF130	TGFA	ITGAM
	ADARB1	BDKRB2	RASSF2	CLEC7A	MARVELD1	GDA	CLU	FCN1	VDR	FERMT3	GPX8
	ADSS	BID	GXYLT2	CD300LG	NOSTRIN	NUBPL	PAPSS2	LILRA2	CD74	VASP	SGPL1
	AGO3	BMP2K	CACNA1D	IL1B	RAB7B	MCEMP1	SEPT3	CD300LF	OGT	TRPM6	SGK1
	AHNAK2	C3	MFSD1	CD14	FNDC7	CLEC4E	FMNL2	ANPEP	CLEC10A	CCR3	FKBP10
	AHR	CAMP	ARL11	GM5150	CACNB3	PPP1R3B	TM4SF5	S100A9	SLC7A11	IFITM1	GAS1
	AKR1B1	CASP4	CYTH4	TREM2	MX1	CEBPE	SLAMF8	PLXDC2	MT-CO1	NFIC	SDC2
	AKT3	CCK	GPR114	FCGR1	CTTNBP2NL	ARG2	ATF3	CYP2S1	CYP2S1	NLRP12	CDH2
	ALDH1A3	CCL11	AMICA1	NAV1	MRAS	NHSL2	KLRI1	LIN7A	HLA-DPA1	PVRL2	CD274
	ALOX5AP	CCL7	NBPF20	ADORA2B	NFIL3	NGP	ID2	RAB32	FERMT3	LINC00664	FAM114A1
	AMPD3	CCR1	LRMP	AIF1	CLU	KLRA17	RAB38	CSTA	KCTD12	S100A11	SNX7
	ANGPTL4	CD47	RP11-433M22.2	P2RY6	CCL4	PDPN	ADCY6	LILRB2	CD109	BEST1	XAF1
	ANKRD36BP2	CEBPB	EVI2B	ABCA9	NRP1	ATF3	ADAM8	LST1	GPX1	HIST1H1C	CD38
	ANKRD42	CP	AIF1	TNFAIP2	ADCY6	ADGRG3	MYCL	RASSF4	CTSB	ALOX5AP
	ANPEP	CSF2	CXorf21	TNS4	NCCRP1	IRG1	STRIP2	LMO2	CD36	TRIM25
	AP1AR	CSF3	CD244	CD300LD	PAPSS2	CELSR3	PLA2G4F	ACTN1	IRF4	NTNG2
	AREG	CXCL2	MANBA	SLC11A1	SEPT3	RSAD2	TBC1D8	FAM198B	SPATS2L	ZDHHC18
	AREGB	CYR61	NBPF10	CLEC4A3	NAGA	SCNN1A	TNFAIP2	NLRP12	GPRIN3	ZNF697
	ARMC10	DDIT3	MAP7	DPEP2	FMNL2	TNFRSF1A	SERPINB6B	CLEC12B	SH3BP4	GPAT3
	ARMC10P1	DOCK4	PNRC1	XDH	LPAR3	LST1	ARHGAP22	VCAN	PLD4	DUSP6
	ARNT2	DRAM1	GPR183	RIN2	TM4SF5	ADAM8	HAVCR2	S100A11	TGFBI	RP1-28O10.1
	ARSG	DST	GPA33	PDLIM4	ADRBK2	SLC15A3	ATP11A	MARVELD1	CSF2RA	C3AR1
	ASXL2	ELL2	ARHGEF40	F10	SLAMF8	HCAR2	SPSB1	CSF2RA	EPB41L3	LILRA6
	ATE1	ERN1	ARHGAP9	TNFSF13	ATF3	OSM	FSCN1	EPB41L3	KLF4	ORM1
	ATG14	FABP4	SSXP10	TNFSFM13	KLRI1	IER3	GCNT2	NACC2	FRMD4B	NFKBIA
	ATP2B1	FAH	MIS18BP1	DRAM1	ANXA3	IGF1R	TLR11	FCAR	CALCRL	TSPAN16
	ATP6V1C1	FAM82A1	FRY	GALNT9	CXX1C	ATP11A	RAMP1	LGALS2	H2AFY	SPI1
	ATP13A3	FAS	BTG2	TNFRSF1A	PDE4DIP	CDC42EP2	PDLIM4	UPP1	SCN9A	ANXA3
	ATXN3	FGFR1OP	ZNF439	4930455G09RIK	ID2	ARHGAP23	P2RY6	FRMD4B	GRAMD1B	IFITM3
	BBS2	FZD1	TGM5	CCDC109B	RAB38	FCGR4	ARL4C	P2RY2	PALD1	CD300LB
	BBS9	GADD45B	CXCR2	PI16	GCNT2	CLEC5A	ADAM23	C3AR1	ARL4C	TLR8
	BCL2A1	GBE1	CALCOCO2	APOC2	FAM129A	CLDN15	CSF2RB2	LILRA6	GAPDH	CREB5
	BCL9	GDPD1	TRIM22	ARRDC4	ADAM8	CD300LB	FRMD4A	CFD	H3F3B	CDKN2D
	BCR	HP	GLA	PLA2G7	TNFRSF11A	GM166	LAD1	ADGRE1	CD4	NINJ1
	BCRP1	IKBKE	CYB5R4	GM1673	MYCL	STFA2	IL1B	IER3	SH2B3	NFAM1
	BCRP3	IL13RA2	BMF	CDC42EP2	STRIP2	GCNT2	GM6377	HK3	S100A4	DOCK4
	BDKRB2	IL18RAP	MYT1L	PLD1	TRERF1	CHIL3	CPQ	LYNX1	ACTG1	MGAM2
	BET1	IL1A	CCNG2	PILRA	PLA2G4F	PABPC1L	IL13RA1	MTMR11	HNRNPH1	CXCL1
	BHLHE41	IL1RAP	TP53INP1	AOAH	TBC1D8	LHX1	MEFV	PLD1	MPEG1	GIMAP4
	BOD1L1	IL6	C1RL	CCL6	TNFAIP2	LTB4R1	PIK3CB	CCDC149	ETS2	JAG1
	BRWD1	IRG1	ZBTB18	VNN3	KLRE1	IL13RA1	SH3PXD2B	CDA	ID2	HSPA6
	BTN2A2	IVL	SLA	FYB	SERPINB6B	PIK3CB	HSPA1A	PTGER2	TTYH2	OTX1
	BTN2A3P	JUNB	CD48	NRP1	CDHR1	RETNLG	CCL4	CD300LB	IL18R1	ID2
	BZW2	KLRA2	RP11-212I21.4	HP	ARHGAP22	ARAP3	KIF1A	LINC01272	FNIP2	OSM
	C1orf63	LCE1I	RASGRP3	PROS1	HAVCR2	CASS4	FYB	GNAQ	MYCL	TLCD2
	C1QTNF1	LCE3F	EMP3	PAPSS2	NME9	PROK2	CXCL9	SIRPB1	VIM	QSOX1
	C8orf4	LCN2	JDP2	PILRB1	GPC1	ANKRD22	1700025G04RIK	PVR	B2M	HIST1H2BC
	C11orf95	LIF	RP11-1055B8.7	CXCL16	FFAR2	GSN	SULF2	C5AR1	RRBP1	DENND5A
	C12orf55	LOX	AFAP1-AS1	CCL3	ASPRV1	CSF2RB2	FUT4	NFAM1	HLA-DRA	FGR
	C18orf8	LYZ1	AP001626.1	CAMK1	HSPA1B	UGT1A7C	ZBTB46	CD4	RUNX2	PDLIM7
	CA9	MAFF	KLHL24	RND3	HSD3B7	CES1D	APOL7C	CTSD	MCL1	CDC42EP3
	CA12	MAP3K8	TRANK1	CXCL10	VCAM1	GM5763	AVPI1	EMP1	DAPK1	ACTBP8
	CACHD1	MMP8	SPINK2	MEFV	RAP2A	WFDC21	TTC39A	GIMAP4	FURIN	ICAM1
	CACNA1A	NFKBIZ	MXD4	SLAMF8	ATP11A	ATP8B4	BCL2A1C	AIF1	KCNK6	DAPK1
	CASC7	ODC1	CD37	EMILIN2	ARL4C	SLC40A1	RGS1	WDFY3	HLA-B	LCP2
	CASC19	OLR1	RP11-861A13.4	SIRPB1C	SPSB1	CXCL2	FFAR4	PID1	GNA15	NFIL3
	CASP8	OSMR	CD38	ADGRE1	SLC4A8	PYGL	FGL2	ALDH1A1	GPR183	TNFAIP6
	CCAT1	P2RX4	RP11-4M23.2	TMEM106A	FSCN1	ACTN1	PDGFB	LILRB3	THBD	GLULP4
	CCBL2	PDE4B	GMIP	UGT1A7C	CCL3	PXN	SULT1A1	C5AR2	GRN	THBD
	CCDC71L	PIM1	TRPM4	CX3CR1	TLR11	PTGS2	GPR68	MAFB	MT-ND4	LRG1
	CCL3	PION	MYO15B	P2RY1	RAMP1	CLEC7A	RTN1	RPH3A	PLAUR	HCAR3
	CCL3L1	PLK2	CRIM1	HSPA1A	CCL12	C5AR2	KIT	ID2	SLC4A3	PTGS2
	CCL3L3	PRDX6	ATP8B3	GPR35	PDLIM4	CPD	ITGAX	HMOX1	APOBR	B3GNT8
	CCL20	PRL8A9	PDE1B	CXCL9	P2RY6	TRPM2	KLRK1	CDKN1C	SPNS3	IFIT3
	CCNG2	PTGER2	LPAR2	GSPT2	LAG3	CLEC4B1	SH3BGRL	MARCO	CST3	FRAT2
	CCNT1	PTPRK	GAB3	UGT1A8	TSPAN33	FAM101B	ZMYND15	NID1	APP	BID
	CD58	PTX3	SH2D3C	UGT1A10	ADAM23	EMILIN2	SPINT1	FNIP2	SHTN1	RCN3
	CD69	PVRL2	LINC00877	HFE	SLC22A18	IGHG2C	IFI205	MYCL	FCGRT	TMEM170B
	CD82	RAPH1	CREBRF	TIAM2	CXCL1	GLYCAM1	FAM129A	GNA15	FOS	ADGRE3
	CDCP1	RNF11	CD33	CYSLTR1	PTMS	MTUS1	ENO2	SMPDL3A	FOSL2	MTND5P32
	CDK17	S100A8	KLHL4	SERPINB10	LARGE	RHOU	PMAIP1	B3GNT5	MT-CO2	CASS4
	CEBPZ	SBNO2	PBXIP1	IGSF6	LIMA1	SAMSN1	BATF3	ETS2	SULF2	P4HA2
	CFLAR	SERPINB9G	CALCOCO1	CLEC4B1	CPNE2	TACSTD2	RND3	TIMP1	TMEM170B	CCR1
	CHST11	SLC25A37	UCP2	CLEC5A	CSF2RB2	TGFBI	CCND1	HBEGF	P2RY6	B3GNT5
	CLEC2B	SLCO3A1	GAPT	CSF3R	FRMD4A	RAB3D	FOSB	MS4A6A	INPP4A	FAM129A
	CLEC2D	SLFN2	ARNTL	NOSTRIN	LAD1	LCP2	ESAM	SLC11A1	TNFRSF1B	KIAA0513
	CLGN	SLIT2	FGL2	ATF3	IL1B	HK3	PDGFA	CD33	PSAP	ARAP3
	CLMP	SLIT3	TBXAS1	CLEC4D	FGL2	PALM	P2RY14	SDC2	B3GNT5	SLC19A1
	COL10A1	SLPI	LST1	CD68	CPQ	STFA2L1	VSIG10	CLEC12A	LYZ	IL1RN
	COLEC12	SOD3	RGL4	TMEM51	IL13RA1	SOAT2	KCTD17	THBD	AXL	CYP27A1
	CORO2B	SPRR2H	ABCA7	GPX3	MEFV	HMOX1	ANPEP	LPCAT2	C15orf39	LILRB2
	CPD	STEAP1	BMP10	MBOAT1	SNX21	G0S2	TMEM176B	H1F0	ANXA1	RP4-673D20.3
	CREBRF	STEAP2	ARPP21	LCP2	PIK3CB	RGS3	MBOAT1	AC104809.4	SMOX	EEPD1
	CSAD	STOM	TCP11L2	TLR8	CDKN1A	SGMS2	HFE	PLAUR	CSF2RB	CAMK1G
	CSF2	TCFEC	GAL3ST4	HNRNPLL	MEGF8	XDH	CXCL16	IQSEC2	CD33	SLC26A8
	CSGALNACT1	TMEM38B	GPR65	HCAR2	STBD1	MSRB1	PDIA5	ARPIN	DST	PADI4
	CTH	TNFAIP3	C10orf54	I830077J02RIK	SH3PXD2B	PRR5L	CLEC9A	TCN2	ITGB2	MYO1F
	CTSS	TNIP1	GPR56	LTBR	HSPA1A	FUT4	UBE2E2	ADM	FLT3	MMP9
	CXCL1	TTC39C	C9orf9	MCEMP1	BAHCC1	RALB	AIF1	CST3	SAMHD1	HOTAIRM1
	CXCL2	TXNIP	MFAP4	WFDC17	USP18	TNFSF14	OLFM1	FBP1	ALDH2	SLC25A37
	CXCL3	VCAM1	METTL7A	GPR160	PPM1H	LRRC25	NAV1	MITF	SPRED2	KRT23
	CXCL5	VEGFC	PCED1B-AS1	IP6K3	SEMA4A	GDPD3		DAPK1	PTPRE	ABHD2
	CXCL6	VGLL3	SPNS3	CLEC4E	IFT43	CSF1		PRAM1	PABPC1	HPSE
	CXCL10	WDYHV1	STAG3	AKR1C12	KIF1A	CHIL1		SHTN1	CSF1R	FTH1P7
	CYP26B1	XDH	SLC45A3	CD300LB	FYB	TBC1D2B		SIRPB2	P2RY1	C10orf105
	DANCR	ZC3H12A	CTB-133G6.1	SULF2	FAM131A	GM12854		LRP1	MT-CO3	BMX
	DCAF8	ZFPM2	ATG16L2	RAP2A	I830077J02RIK	ALOX5		TGFBI	LCP1	PILRA
	DCP1A		YPEL3	KLF4	CCR2	MYL2		KCNMB1	PLXNB2	RBP7
	DDI2		SYT1	ITGAM	STAP2	AA467197		HGF	FCER1G	LTBR
	DDIT3		PROCA1	BATF3	SERPINF1	INHBA		CFP	GNAQ	MXD1
	DDIT4		C16orf93	CPQ	MB21D1	PI16		HNMT	AMICA1	COTL1
	DDX18		HBP1	LPL	ITGAE	SLCO3A1		P2RY13	MT-ATP6	PLEK
	DDX39B		SKOR1	HPGD	CCL17	MRGPRA1		IGF2BP2	FAM160A1	MPP1
	DENND4C		AC009005.2	LRP1	CX3CR1	TREM1		NLRP3	CUEDC1	NDST1
	DGAT2		LYL1	UBE2E2	TSPAN3	DGAT2		CCR1	LGMN	CHST15
	DGKE		RP11-37C7.3	APOBR	MBOAT1	FMNL2		CES1	SRGN	BCL2A1
	DHX32		SDAD1P1	CLEC10A	HAP1	SEMA4F		LYZ	BHLHE40	C10orf54
	DIO2		ZMAT1	MGL2	FXYD2	NLRX1		KIAA0513	LTBR	NFE4
	DLGAP1-AS2		HMGB3P32	CCL4	CXCL9	LTBR		TIAM1	COTL1	CYP4F3
	DOCK5		C19orf82	HMOX1	1700025G04RIK	EMB		CTSL	SLC8A1	LILRA2
	DPP4		MTL5	ADAP1	APOBR	RASIP1		ANXA1	PLEK	CA4
	DUSP4		BTBD11	CEBPA	DNAAF3	UPP1		APOBEC3A	SMIM3	JDP2
	DUSP5		APOBR	CD33	SULF2	PIRA2		TLR8	CBX6	MEFV
	DUSP6		RNASE6	LILR4B	SLC22A23	UGT1A5		FAM129B	SLC7A5	OPLAH
	DUSP16		HERC2P9	BAG3	HNRNPLL	HDC		MYOF	LILRB4	EFHC2
	DYNC2H1		RP11-38J22.6	LRRC25	ZBTB46	HLX		LTBR	ZMIZ1	VNN3
	EDEM1		FSIP1	GUCA1A	P2RX5	IGSF6		ABCC3	FCER1A	LOXL1
	EDEM3		LRRC37A15P	SULT1A1	APOL7C	UGT1A10		EREG	MOB1B	SELL
	EFTUD1		AP001171.1	SLC7A8	AVPI1	GADD45A		RP11-568K15.1	NEGR1	FTH1
	EFTUD1P1		KB-431C1.4	CHST1	MMP25	LHFPL2		RNF217	UBC	SLPI
	EHF		HSH2D	CCR5	GM5763	TNFAIP2		PLBD1	CCDC50	PFKFB3
	EIF2AK1		SLC15A2	TNFRSF21	HFE	STX11		APOA2	TNFRSF21	TNFAIP2
	ELK4		YPEL1	SLFN1	BCL2A1C	PLA2G7		TMEM176B	CSF3R	PANX2
	ELL2		ANGPTL6	ABCD2	BEX6	TNFRSF21		RASGRP4	FAM105A	ARHGAP26
	ELMOD2		PIK3AP1	CAV1	RGS12	RUFY4		LILRA5	ITM2C	CEBPB
	ELP2		PLD4	APOC1	RGS1	S100A11		MRAS	DDX5	TECPR2
	EML1		EAF2	FCOR	FFAR4	ASPRV1		LRRC25	CCDC88A	CYTH4
	ENO2		PATL2	TMEM205	GM6377	CERS6		THBS1	MS4A6A	PLIN4
	ENOSF1		MX2	SIGLEC1	AMICA1	STK39		C1QA	DOCK5	MRVI1
	ENTPD7		TMEM156	MS4A6C	MANSC1	5-SEP		SIGLEC22P	TNFAIP2	CXCL16
	ERCC1		SLC7A7	GPR141	PDGFB	ID1		FCER1G	DAB2	PYGL
	EREG		NEXN	HAL	TTC39A	TYROBP		LDLRAD3	TBC1D8	TNFRSF1A
	ERN1		LAMP3	LIMA1	MLLT4	DHRS9		AMICA1	LGALS1	PLB1
	ERRFI1		LTB	CTBP2	SULT1A1	RECK		DAGLA	H1F0	IFI6
	ESM1		ACACB	PLAU	EXOC3L4	IL1B		FBN2		CDH23
	ETS2		EFHC1	TMEM141	GPR68	CHIL4		STAB1		NHSL2
	EYA4		AC072062.1	FKBP9	RTN1	CHIL5		RHOU		SLC12A1
	FAM43A		RP1-32B1.4	NAT8L	CC2D2A	CEACAM10		CD36		FCGR2A
	FAM72A		AC009506.1	IL6RA	KIT	LYPD6B		CUEDC1		SECTM1
	FAM72B		CEBPE	SORT1	RASA4	HP		GIMAP6		RIT1
	FAM72D		P2RY10	SNTA1	ANPEP	GM14548		KCNE3		DMXL2
	FAM91A1		LINC01021	NHSL2	ITGAX	GM15930		CD300E		RNF130
	FAM102A		KLF7	FUT4	KLRK1	FYB		ARRB1		ERN1
	FAM126A		CD34	NFIL3	SH3BGRL	SLC11A1		RBP7		ASPRV1
	FAM185A		IDNK	CLN8	ZMYND15	4930438A08RIK		PDK4		MME
	FAM196A		MYLK-AS1	CRYBA4	GLYCAM1	TBC1D2		SLC8A1		DAAM2
	FAM213A		AF127936.5	MAP3K6	SPINT1	PILRB1		SASH1		IFNGR1
	FBXL20		NLRP6	CD209B	NOTCH4	MMP8		SMIM3		MNDA
	FBXO28		KRT8P46	ITGB5	IFI205	SQRDL		LILRA1		FAM157A
	FER1L6		S100Z	GM5763	MMP23	MVB12B		SORT1		TNFRSF10C
	FGF2		SLC2A11	TNFRSF11A	NUDT17	IFITM1		CEBPB		PADI2
	FGF7		SLC18A2	BATF2	CD209B	TRP53INP2		CLEC7A		DGAT2
	FHOD3		DPEP2	CCL2	SHTN1	APOM		MEFV		RNF19B
	FKBP11		RP11-359E3.4	WFDC18	ENO2	GM5150		CD14		ITM2B
	FLRT3		RP11-369G6.2	SPINK2	PMAIP1	CHAC1		TMTC1		SLC11A1
	FMNL2		AC004840.9	TREML4	TUBB6	RHOB		HRH2		AATK
	FNBP4		GPC2	PIK3CB	BATF3	VNN3		SLC24A4		ITGAD
	FOXQ1		SELL	PAK1	TGFBI	TRIB1		RUSC2		PLPPR2
	FUT8		PLA2G2C	HPCAL1	EPB41L3	SOCS3		C19orf38		HIST1H2AC
	GAS5		CHGB	CDS1	RND3	TBC1D8		CEBPA		PPCDC
	GCC2		PAIP2B	FKBP1B	CD207	FGR		CSF3R		TPD52L2
	GCH1		AL133458.1	THBS1	AI607873	LY6F		FAM20C		TALDO1
	GDF15		ERO1LB	PIGZ	FOSB	MYO1F		ZNF697		FRMD4B
	GDNF		IGFBP7	CTTNBP2NL	SESTD1	TNFSF13B		TMEM176A		TRIB1
	GEM		LCN9		ESAM	MGLL		PDGFC		ITPRIP
	GEMIN5		CD300A		PDGFA	CARD10		ALDH3B1		DEDD2
	GJA1		ZCWPW1		ARC	VSIG10L		G0S2		MIR4772
	GLIS3		CTC-459F4.1		P2RY14	GM10693		LRP3		LILRA5
	GM2A		RP11-455F5.4		BCL2L14	SLFN4		ARHGEF40		IFITM2
	GMCL1		BNIP3		NR4A2	CCRL2		KCTD15		NLRP3
	GNG11		TNFAIP2		VSIG10	SCRG1		CEBPD		LILRB3
	GNL3		CCDC24		CD209D	EDNRA		DOCK5		MIR22HG
	GPBP1L1		AC007092.1		KCTD17	FOSB		ZNF503		LUCAT1
	GPR135		RP11-830F9.7		FAM135A	TREM3		TNFAIP2		GK
	GRK5		WBP1		TMEM176B	TMEM38A		DMXL2		TSPAN2
	GSAP		RP11-405F3.4		TBC1D9	DRAM1		IER5L		CLEC4D
	GTF2E1		HTR7P1		FUT4	CD300LF		PFKFB4		B2M
	GTPBP10		PIK3IP1		CXCL16	SLC2A6		CSF1R		CLEC4E
	HDAC3		CD1C		PDIA5	AMER2		SIGLEC9		CSRNP1
	HEPHL1		FAM179A		MICAL2	LCN2		SERPINA1		FCGR3B
	HEY1		GPR97		CDKN2B	B430306N03RIK		CD163		DMRTC2
	HGF		CDH23		ENPP4	CEBPB		CD300C		TBC1D30
	HK2		CEL		CLEC9A	MCAM		PYGL		C5AR2
	HMG20A		MGAT3		UBE2E2	SIRPB1C				ATG2A
	HNRNPU-AS1		ITGB6		PALLD	BC100530				PXN-AS1
	HOMER1		AC079610.1		TREML4	FAS				PPP1R18
	HPS5		GIPR		AIF1	STFA1				IL18RAP
	HSPA8		RP11-586D19.2		MPEG1	CD101				PRR33
	IER3		TTLL6		KCNIP3	IL18RAP				GBP5
	IFNE		ENPP7P11		CCND1	TMEM40				CTA-384D8.35
	IGFBP5		LINC01088		OLFM1	PAK1				SCARF1
	IL1A		NPAS1		NAV1	ARSG				MCL1
	IL1B		H1FX-AS1			PTGER2				ADAMTSL4
	IL1R1		RP5-1103G7.4			ANXA1				LYZ
	IL1RL1		RP5-1092A3.4			CXCR2				RN7SKP296
	IL6		CYP4F2			FOS				CDKN1C
	IL8		ZNF165			OLFM4				HLX
	IL12A		PLCXD2			CRISPLD2				TMEM119
	IL24		CTD-3224K15.3			SLC2A3				GADD45G
	IL36RN		NKAPP1			OSGIN1				TLE3
	IMPAD1		RP11-551L14.1			IFNLR1				NACC2
	INPP5F		LINC00341			6430548M08RIK				DHRS9
	IP6K2		WDFY4			ARL11				PLEKHG3
	IPO5		AVIL			KRT86				ADM
	IRAK2		RP5-1185I7.1			NT5E				MICALCL
	IRAK3		RP4-694B14.5			5430421N21RIK				CD300A
	ITGB3		PHACTR1			PTAFR				SLC15A3
	IVNS1ABP		RP11-568N6.1			PADI4				SDCBP
	JMY		IL18RAP			ARMC7				SERPING1
	JUN		CELF2-AS1			NFAM1				GJB6
	KCNJ2		RP11-61O1.1			C5AR1				CFP
	KCNN3		HSD17B8			NCAM1				HIST2H2BE
	KDM7A		RASGEF1B			FCER1G				KIAA1257
	KHDRBS1		CAMK4			GM7665				P2RY13
	KIAA0907		AFAP1L2			C3				TXNRD1
	KIAA1199		FAM13A-AS1			UGT1A6A				HCAR2
	KIF3B		RP5-1086K13.1			WIPI1				NEDD9
	KLHL7		LINC00886			DDX60				RNF24
	KRR1		LINC00173			LILRA6				LINC00937
	KRTAP1-5		TXLNB			BMX				DUSP1
	LAPTM5		RP11-713P17.3			FFAR2				ITGB2
	LARS		AC009133.17			AGAP1				SYNJ1
	LETMD1		RP3-460G2.2			4632428N05RIK				SLED1
	LIF		RP11-10K16.1			SLFN1				IGF2R
	LINC00265		RP5-966M1.6			CAMP				PPT1
	LINC00657		RP3-388E23.2			CHRM3				PTPRE
	LINC00837		RP11-157N3.1			LY6G5B				CXCR2
	LINC00973		FAM167A			SIGLECE				LCP1
	LINC00999		RUNDC3A			SEPN1				ADGRE2
	LINC01001		GUCY1B2			TINAGL1				BAIAP2
	LINC01002		RP11-25H12.1			P2RY13				GNAQ
	LMBR1		AC074138.3			MEFV				BST1
	LPXN		GABARAP			GLIPR2				SVILP1
	LRIG1		RP11-26E5.1			EGLN3				ADORA2A-AS1
	LRRC15		IFI35			UGT1A1				ITGAX
	LRRC58		RP11-347C18.3			SLC32A1				LINC01002
	LUCAT1		RP11-353N14.2			CCL4				HEY1
	LYAR		KRT8			AF251705				LRRC4
	LYPLA1		RP11-396C23.4			OLFML2B				CPPED1
	LYRM7		LHX4			TIMP2				SFN
	MANBA		BCL6			HNRNPLL				BCL6
	MAP2K1		EMR2			CHST13				CEACAM4
	MAP3K5		ZMIZ1-AS1			BMPR1A				ZYX
	MAP3K13		RP11-383F6.1			DGKG				LILRA1
	MCL1		RP11-443P15.2			DGAT1				FAM8A1
	MCUR1		CASC2			TARM1				CLEC7A
	MED1		GGT1			CD300A				NME8
	MED28		C2orf81			OAS3				HRH2
	MEDAG		RP11-55K13.1			CD6				SLC24A4
	MEG3		HHLA2			AMICA1				RP11-44F14.2
	MEG8		ATP13A4			PGLYRP1				SLC2A3
	MEPCE		FZD2			DMWD				CYSTM1
	MERTK		RP11-173A16.2			CD300LD				XPO6
	METTL8		ADAM2			ITGAM				TMEM132D
	MFGE8		RP11-250B2.5			SCAMP1				CSF3R
	MIR31HG		OPRL1			RAP1GAP2				LINC01272
	MIR539		MPP7			TUBA8				LINC00963
	MIR635		RGPD2			PLD1				IRS2
	MIR770		ZNF467			MMP25				TNFSF13B
	MIR889		RP11-1055B8.4			PIRB				G0S2
	MIR1262		PKIB			CD63				ACSL1
	MIR3189		RP11-54O7.1			LIN28A				XKR8
	MIR4449		RP11-16C1.2			CD177				ARHGEF40
	MKL2		TIPARP-AS1			KLF5				CEBPD
	MMD		MC1R			PILRA				CPQ
	MME-AS1		MAP7D2			SEMA6B				LRFN1
	MMP3		S100A13			DUSP1				ADGRG3
	MMP10		RP11-98D18.9			PER1				RBM47
	MMP12		AC079584.2			IL1R2				SIGLEC9
	MMP19		CACFD1			SIRPA				LINC00282
	MORC3		SNAI3			IL18R1				FPR1
	MPHOSPH6		RP11-1055B8.6			RASGRP4				GPR84
	MT1A		RP3-329A5.8			GPR35				NHS
	MT1X		AC004951.6			SLC6A13				SLC6A6
	MTAP					SLC6A12				IL6R
	MTF1					TREML4				FCGR3A
	MTFMT					WFDC17				LAMP2
	MTMR4					DFNA5				TYROBP
	MUM1					CCDC80				PREX1
	MYBBP1A					PLAUR				CD93
	MYC					GCA				VNN2
	MYO1D					MAPK13				PTGES
	NAB1					PHOSPHO1				CTSS
	NAMPT					CPNE2				CD300LF
	NAMPTL					ARRDC4				ABHD12B
	NAV3					NFIL3				MICAL2
	NBR1					ST3GAL5				IVNS1ABP
	NEK10					SEMA4A				SIRPA
	NFKBIA					GM9949				RAB32
	NFKBIZ					GPC1				RALB
	NFYA					APH1B				CSF1
	NKX3-1					CXCR1				SIPA1L2
	NMRK1					UGT1A8				LST1
	NOLC1					PLK3				LITAF
	NOP58					HACD4				MGAM
	NR4A3					MXD1				KREMEN1
	NRG1					PPP1R3D				CLEC12B
	NRIP3					CCNO				TREM1
	NUMB					GALM				ROPN1L
	NUS1					GP1BB				PHOSPHO1
	OR5B21					APP				PRDM5
	OSGIN2					SLC39A4				SEC14L1
	OSMR					PBX1				CSF2RA
	OTUB2					GM5483				CXCL6
	PANX1					FPR1				FCAR
	PAQR3					FMO5				UPP1
	PAQR5					UGT1A6B				P2RY2
	PARN					BC117090				HCG27
	PCNX					HPCAL1				LINC01127
	PDCD11					SLC7A11				IER3
	PDE4DIP					DMXL2				SBNO2
	PDGFRA					LILRB4A				SLA
	PDP2					LILR4B				IFIT2
	PEG10					ORM1				CDA
	PFKFB3					HSD11B1				SIRPB1
	PGM2L1					CCL3				FFAR2
	PHC3					TST				PECAM1
	PHLDA1					AQP9				ST3GAL4
	PHYH					TGM2				SNX18
	PI3					ZFP652				HIST2H2BF
	PIK3CG					FGL2				GPR162
	PITPNC1					LTF				TLR4
	PLAT					ACVRL1				CCL3L3
	PLEK2					PFKFB4				FOXO3
	PLIN2					I830077J02RIK				C5AR1
	PLTP					IFITM2				WDFY3
	POLR1B					PPP1R42				NPL
	POLR3A					APOBR				SLC40A1
	POU2F2					LRG1				GPR27
	PPARA					UGT1A9				SLC45A4
	PPP1R10					UGT1A2				IL1R1
	PPP2R1B					AOAH				TLR2
	PREX1					CD33				ITGA5
	PRKD3					FGD4				RNF175
	PRKG2					IFITM6				AMPD2
	PRPF4					SORT1				KCNJ15
	PTGS2					RGS1				ETS2
	PTPN12					ITGB2				FAM157C
	PUS7					TNF				CEACAM3
	QPCT					IL15				VEGFA
	RAB3D					FPR2				LINC00877
	RAB31					IFIT1BL2				CTD-3088G3.8
	RAC2					CRTAC1				WLS
	RALGPS2					NFE2				CCNJL
	RAP2A					MMP9				CLEC12A
	RASA2					SLC22A15				RASGRP4
	RASD1					RPS6KA2				SAMSN1
	RASSF3					FAM129A				MMP25
	RASSF8					RAB11FIP4				EPHB1
	RBPJ					LBP				APOBR
	RCC2					MGAM				MANSC1
	RCN3					LY6C1				PTEN
	RDH10					FOXD4				MEGF9
	RFTN2					ACTA2				NECAB2
	RGS5					OASL2				PRAM1
	RIPK2					SMOX				FCGRT
	RNA5SP334					TMEM45A2				FOS
	RNF149					GM15922				SPRY2
	RNU4-24P					RPL3L				NAMPT
	RNU4ATAC					CCL6				LINC01270
	RNU5A-1					CD14				IL1B
	RNU6-403P					CLEC4D				GBP2
	RNU6-564P					GPR84				FYB
	RNU6ATAC					A530064D06RIK				TREML2
	RNU6ATAC2P					PRPS1L1				TNFRSF1B
	RORA									C15orf39
	RPL3									TNFRSF12A
	RPL4									RGS3
	RPL18A									TGM3
	RPL23									PHC2
	RPL23A									PLBD1
	RPS3									ACPP
	RPS6KB1									CD177
	RPS15AP10									SIGLEC7
	RRAD									RAB3D
	RRN3									LPCAT2
	RRN3P1									BTNL8
	RRN3P2									PLXNC1
	RRP1B									IL1RAP
	RSL24D1									FCER1G
	RTTN									FRY
	RWDD2A									MARCH1
	SAA1									KCNE3
	SALL1									CFAP58-AS1
	SAMD4B									FTH1P2
	SBNO1									F5
	SCG5									SRGN
	SDE2									ARRB2
	SEMA3C									FPR2
	SEMA6D									PTAFR
	SERPINB3									LSP1
	SERPINB4									SLC8A1
	SERPINB7									RNF149
	SESTD1									PPM1F
	SEZ6L2									CD63
	SH2B3									CAMP
	SH3PXD2B									PSTPIP2
	SHC3									CHI3L1
	SHPRH									LOXHD1
	SIAE									NOL4L
	SIN3A									SPACA6P
	SLC4A7									NAMPTP1
	SLC7A2									S100A8
	SLC11A2									LINC00211
	SLC16A6									ZBTB7B
	SLC16A6P1									RP11-70C1.1
	SLC18B1									CNTNAP3
	SLC22A4									SESN2
	SLC25A15									CARD19
	SLC25A15P1									PLIN5
	SLC25A15P5									ADAM8
	SLC25A37									NFE2
	SLC36A4									APOBEC3A
	SLC39A6									BMP6
	SLC39A14									NOV
	SLC43A3									MMP25-AS1
	SLTM									GLT1D1
	SMOC1									MSRB1
	SNAPC1									PLK3
	SNHG1									CFAP58
	SNHG16									SAT1
	SNORA2A									FHL3
	SNORA12									PLXDC2
	SNORA14B									IPCEF1
	SNORA21									SVIL
	SNORA22									FTL
	SNORA26									OSCAR
	SNORA31									ZMYND15
	SNORA38B									TREML3P
	SNORA59A									SIRPB2
	SNORA59B									FCN1
	SNORA68									VDR
	SNORA71A									FGD4
	SNORA71D									STX11
	SNORD1B									KY
	SNORD3A									NEBL
	SNORD3B-1									VNN1
	SNORD3B-2									LIN7A
	SNORD3C									THEMIS2
	SNORD3D									KIAA1324
	SNORD4B									OR52K3P
	SNORD14D									CD14
	SNORD14E									ACTN1
	SNORD15A									F2RL1
	SNORD15B									IFITM9P
	SNORD16									CXCR1
	SNORD17									DSC2
	SNORD18A									PLAU
	SNORD42A									PLEKHO2
	SNORD46									CHSY1
	SNORD53									S100A9
	SNORD55									S100A12
	SNORD69									CHST7
	SNORD70									GAB2
	SNORD78									TNFSF14
	SNORD83A									AQP9
	SNORD91B									RP11-47I22.2
	SNORD92									HK3
	SNORD93									RGS18
	SNORD100									LAMB3
	SNORD111									LATS2
	SNORD113-6									IL1R2
	SNORD113-8									TMCC3
	SNORD113-9									LINC00671
	SNORD114-1									MCEMP1
	SNORD114-3									ARAP1
	SNORD114-5									RP11-473M20.5
	SNORD114-9									S100A4
	SNORD114-11									IFIT1
	SNORD114-12									TREML4
	SNORD114-13									RAC2
	SNORD114-21									SUMO1P1
	SNORD114-22									SEMA6B
	SNORD114-23									VMP1
	SNORD114-25									FAM157B
	SNORD114-28									SPP1
	SNORD117									SLCO3A1
	SOCS3									CXCL8
	SORD									CMTM2
	SOX4									PXN
	SP3									TIMP1
	SP140									NABP1
	SPAST									GABARAPL1
	SPRY2									GNA15
	SQRDL									C20orf197
	SRD5A3									RTN3
	SRPR									PLAUR
	ST3GAL1									HAL
	ST20									CRISPLD2
	ST20-MTHFS									STX3
	STAT6									OASL
	STEAP1B									TOB1
	STEAP2									FNDC3B
	STK4									SIRPAP1
	STK38L									FOSL2
	SUPV3L1									GLUL
	SYT11									DRC7
	TAGLN3									FAM212B
	TBC1D9									FAM214B
	TBRG1									DOK3
	TBXAS1									QPCT
	TCP11L2									LIPN
	TFPI2									DOCK5
	THBD									SORL1
	TMEM57									STEAP4
	TMEM156									FGL2
	TMEM170A									FAM101B
	TMX4									AOAH
	TNC									SOCS3
	TNFAIP3									LRRC25
	TNFRSF10B									CSTA
	TNFSF15									DYSF
	TNIP1									PROK2
	TOP1									AMICA1
	TPCN1									AIF1
	TPT1									RFX2
	TPT1-AS1									CUEDC1
	TRAF3IP2									NCF2
	TRAP1									CFD
	TRIB1									LINC01506
	TRIM23									KCNJ2
	TRIM33									S100P
	TRIM52									GLIPR2
	TRPA1									STK40
	TRPS1									SULT1B1
	UBAC2									PPP1R3B
	UBE2W									SORT1
	ULBP1									H1F0
	URB1									TMEM71
	USP3									SLC22A4
	USP12									C5orf58
	USP53									RN7SL368P
	UST									DHX34
	UTP6									DBN1
	VEGFA									FCGR1B
	VNN1									ALDH1A2
	VNN3									RXRA
	VPS13D									FLOT1
	VWA9									NR6A1
	WDR3									PLD1
	WDR35									ABHD5
	WDR36									APOA2
	WLS									PI3
	WNT5A-AS1									TSHZ3
	ZBTB21									PGLYRP1
	ZBTB37									GNB2
	ZC3H8									CPD
	ZC3H12A									SELPLG
	ZC3H12C									PFKFB4
	ZCCHC6									CYP4F12
	ZCCHC17									ST3GAL6
	ZNF143									SERPINA1
	ZNF217									UBTD1
	ZNF404									RGS2
	ZNF438									PGD
	ZRANB1									MBOAT2
	ZSWIM5
	ZSWIM6
